# Supplementary material for: On the generation of global surrogate models through unconstrained multi-objective optimization
Source: Research Square preprint supplement (doi:10.21203/rs.3.rs-1409615/v1), 2022-06-03
Supplement: Supplementary file 1 [file 0d0b689c3c4df548fa53b527.csv]

id	name	first	last	compas_screening_date	sex	dob	age	age_cat	race	juv_fel_count	decile_score	juv_misd_count	juv_other_count	priors_count	days_b_screening_arrest	c_jail_in	c_jail_out	c_case_number	c_offense_date	c_arrest_date	c_days_from_compas	c_charge_degree	c_charge_desc	is_recid	r_case_number	r_charge_degree	r_days_from_arrest	r_offense_date	r_charge_desc	r_jail_in	r_jail_out	violent_recid	is_violent_recid	vr_case_number	vr_charge_degree	vr_offense_date	vr_charge_desc	type_of_assessment	decile_score	score_text	screening_date	v_type_of_assessment	v_decile_score	v_score_text	v_screening_date	in_custody	out_custody	priors_count	start
1	miguel hernandez	miguel	hernandez	2013-08-14	Male	1947-04-18	69	Greater than 45	Other	0	1	0	0	0	-1	2013-08-13 06:03:42	2013-08-14 05:41:20	13011352CF10A	2013-08-13		1	(F3)	Aggravated Assault w/Firearm	0									0					Risk of Recidivism	1	Low	2013-08-14	Risk of Violence	1	Low	2013-08-14	2014-07-07	2014-07-14	0	0
1	miguel hernandez	miguel	hernandez	2013-08-14	Male	1947-04-18	69	Greater than 45	Other	0	1	0	0	0	-1	2013-08-13 06:03:42	2013-08-14 05:41:20	13011352CF10A	2013-08-13		1	(F3)	Aggravated Assault w/Firearm	0									0					Risk of Recidivism	1	Low	2013-08-14	Risk of Violence	1	Low	2013-08-14	2014-07-07	2014-07-14	0	334
3	kevon dixon	kevon	dixon	2013-01-27	Male	1982-01-22	34	25 - 45	African-American	0	3	0	0	0	-1	2013-01-26 03:45:27	2013-02-05 05:36:53	13001275CF10A	2013-01-26		1	(F3)	Felony Battery w/Prior Convict	1	13009779CF10A	(F3)		2013-07-05	Felony Battery (Dom Strang)				1	13009779CF10A	(F3)	2013-07-05	Felony Battery (Dom Strang)	Risk of Recidivism	3	Low	2013-01-27	Risk of Violence	1	Low	2013-01-27	2013-01-26	2013-02-05	0	9
4	ed philo	ed	philo	2013-04-14	Male	1991-05-14	24	Less than 25	African-American	0	4	0	1	4	-1	2013-04-13 04:58:34	2013-04-14 07:02:04	13005330CF10A	2013-04-13		1	(F3)	Possession of Cocaine	1	13011511MM10A	(M1)	0	2013-06-16	Driving Under The Influence	2013-06-16	2013-06-16		0					Risk of Recidivism	4	Low	2013-04-14	Risk of Violence	3	Low	2013-04-14	2013-06-16	2013-06-16	4	0
4	ed philo	ed	philo	2013-04-14	Male	1991-05-14	24	Less than 25	African-American	0	4	0	1	4	-1	2013-04-13 04:58:34	2013-04-14 07:02:04	13005330CF10A	2013-04-13		1	(F3)	Possession of Cocaine	1	13011511MM10A	(M1)	0	2013-06-16	Driving Under The Influence	2013-06-16	2013-06-16		0					Risk of Recidivism	4	Low	2013-04-14	Risk of Violence	3	Low	2013-04-14	2013-06-16	2013-06-16	4	63
5	marcu brown	marcu	brown	2013-01-13	Male	1993-01-21	23	Less than 25	African-American	0	8	1	0	1				13000570CF10A	2013-01-12		1	(F3)	Possession of Cannabis	0									0					Risk of Recidivism	8	High	2013-01-13	Risk of Violence	6	Medium	2013-01-13			1	0
6	bouthy pierrelouis	bouthy	pierrelouis	2013-03-26	Male	1973-01-22	43	25 - 45	Other	0	1	0	0	2				12014130CF10A		2013-01-09	76	(F7)	arrest case no charge	0									0					Risk of Recidivism	1	Low	2013-03-26	Risk of Violence	1	Low	2013-03-26			2	0
7	marsha miles	marsha	miles	2013-11-30	Male	1971-08-22	44	25 - 45	Other	0	1	0	0	0	0	2013-11-30 04:50:18	2013-12-01 12:28:56	13022355MM10A	2013-11-30		0	(M1)	Battery	0									0					Risk of Recidivism	1	Low	2013-11-30	Risk of Violence	1	Low	2013-11-30	2013-11-30	2013-12-01	0	1
8	edward riddle	edward	riddle	2014-02-19	Male	1974-07-23	41	25 - 45	Caucasian	0	6	0	0	14	-1	2014-02-18 05:08:24	2014-02-24 12:18:30	14002304CF10A	2014-02-18		1	(F3)	Possession Burglary Tools	1	14004485CF10A	(F2)	0	2014-03-31	Poss of Firearm by Convic Felo	2014-03-31	2014-04-18		0					Risk of Recidivism	6	Medium	2014-02-19	Risk of Violence	2	Low	2014-02-19	2014-03-31	2014-04-18	14	5
9	steven stewart	steven	stewart	2013-08-30	Male	1973-02-25	43	25 - 45	Other	0	4	0	0	3	-1	2013-08-29 08:55:23	2013-08-30 08:42:13	13012216CF10A		2013-08-29	1	(F3)	arrest case no charge	0									0					Risk of Recidivism	4	Low	2013-08-30	Risk of Violence	3	Low	2013-08-30	2014-05-22	2014-06-03	3	0
9	steven stewart	steven	stewart	2013-08-30	Male	1973-02-25	43	25 - 45	Other	0	4	0	0	3	-1	2013-08-29 08:55:23	2013-08-30 08:42:13	13012216CF10A		2013-08-29	1	(F3)	arrest case no charge	0									0					Risk of Recidivism	4	Low	2013-08-30	Risk of Violence	3	Low	2013-08-30	2014-10-28	2014-11-01	3	277
9	steven stewart	steven	stewart	2013-08-30	Male	1973-02-25	43	25 - 45	Other	0	4	0	0	3	-1	2013-08-29 08:55:23	2013-08-30 08:42:13	13012216CF10A		2013-08-29	1	(F3)	arrest case no charge	0									0					Risk of Recidivism	4	Low	2013-08-30	Risk of Violence	3	Low	2013-08-30	2014-10-28	2014-11-01	3	428
10	elizabeth thieme	elizabeth	thieme	2014-03-16	Female	1976-06-03	39	25 - 45	Caucasian	0	1	0	0	0	-1	2014-03-15 05:35:34	2014-03-18 04:28:46	14004524MM10A	2014-03-15		1	(M1)	Battery	0									0					Risk of Recidivism	1	Low	2014-03-16	Risk of Violence	1	Low	2014-03-16	2014-03-15	2014-03-18	0	2
11	darrell blackburn	darrell	blackburn	2013-12-09	Male	1995-11-16	20	Less than 25	Caucasian	0	10	0	1	0	-1	2013-12-08 08:17:29	2014-01-10 12:16:01	13016981CF10A	2013-12-08		1	(F3)	Possession Of Alprazolam	0									0					Risk of Recidivism	10	High	2013-12-09	Risk of Violence	9	High	2013-12-09	2014-08-06	2020-01-01	0	32
11	darrell blackburn	darrell	blackburn	2013-12-09	Male	1995-11-16	20	Less than 25	Caucasian	0	10	0	1	0	-1	2013-12-08 08:17:29	2014-01-10 12:16:01	13016981CF10A	2013-12-08		1	(F3)	Possession Of Alprazolam	0									0					Risk of Recidivism	10	High	2013-12-09	Risk of Violence	9	High	2013-12-09	2015-04-07	2015-04-20	0	844
11	darrell blackburn	darrell	blackburn	2013-12-09	Male	1995-11-16	20	Less than 25	Caucasian	0	10	0	1	0	-1	2013-12-08 08:17:29	2014-01-10 12:16:01	13016981CF10A	2013-12-08		1	(F3)	Possession Of Alprazolam	0									0					Risk of Recidivism	10	High	2013-12-09	Risk of Violence	9	High	2013-12-09	2015-04-07	2015-04-20	0	497
12	jamie good	jamie	good	2014-09-05	Female	1989-04-23	26	25 - 45	Caucasian	0	5	0	0	0	-1	2014-09-04 02:37:17	2014-09-05 08:41:35	14012075CF10A	2014-09-04		1	(F3)	Possession Of Alprazolam	0									0					Risk of Recidivism	5	Medium	2014-09-05	Risk of Violence	3	Low	2014-09-05	2014-10-29	2015-01-09	0	0
12	jamie good	jamie	good	2014-09-05	Female	1989-04-23	26	25 - 45	Caucasian	0	5	0	0	0	-1	2014-09-04 02:37:17	2014-09-05 08:41:35	14012075CF10A	2014-09-04		1	(F3)	Possession Of Alprazolam	0									0					Risk of Recidivism	5	Medium	2014-09-05	Risk of Violence	3	Low	2014-09-05	2015-05-15	2015-05-29	0	126
12	jamie good	jamie	good	2014-09-05	Female	1989-04-23	26	25 - 45	Caucasian	0	5	0	0	0	-1	2014-09-04 02:37:17	2014-09-05 08:41:35	14012075CF10A	2014-09-04		1	(F3)	Possession Of Alprazolam	0									0					Risk of Recidivism	5	Medium	2014-09-05	Risk of Violence	3	Low	2014-09-05	2015-05-15	2015-05-29	0	266
13	bo bradac	bo	bradac	2013-11-04	Male	1994-06-10	21	Less than 25	Caucasian	0	3	0	0	1	428	2015-01-06 03:55:34	2015-01-07 03:38:44	13000017CF10A	2012-12-31		308	(F2)	Insurance Fraud	1	15002891MM10A	(M1)	0	2015-01-06	Battery	2015-01-06	2015-01-07		1	15000258CF10A	(F2)	2015-01-06	Aggrav Battery w/Deadly Weapon	Risk of Recidivism	3	Low	2013-11-04	Risk of Violence	5	Medium	2013-11-04	2015-01-06	2015-01-07	1	0
14	benjamin franc	benjamin	franc	2013-11-26	Male	1988-06-01	27	25 - 45	Caucasian	0	4	0	0	0	-1	2013-11-25 06:31:06	2013-11-26 08:26:57	13016402CF10A	2013-11-25		1	(F3)	Poss 3,4 MDMA (Ecstasy)	0									0					Risk of Recidivism	4	Low	2013-11-26	Risk of Violence	4	Low	2013-11-26	2013-11-25	2013-11-26	0	0
15	ellyaher lanza	ellyaher	lanza	2013-10-03	Male	1992-08-18	23	Less than 25	African-American	0	6	0	0	3	0	2013-10-03 04:07:35	2013-10-07 08:17:30	13018837MM10A	2013-10-03		0	(M1)	Battery	1	14010414TC40A	(M2)		2014-02-08	Driving License Suspended				0					Risk of Recidivism	6	Medium	2013-10-03	Risk of Violence	4	Low	2013-10-03	2013-10-03	2013-10-07	3	4
16	kortney coleman	kortney	coleman	2013-01-01	Female	1978-08-22	37	25 - 45	Caucasian	0	1	0	0	0	0	2013-01-01 03:28:03	2013-01-02 01:12:19	13000053MM10A	2013-01-01		0	(M1)	Battery	0									0					Risk of Recidivism	1	Low	2013-01-01	Risk of Violence	1	Low	2013-01-01	2013-01-01	2013-01-02	0	1
17	kyle lewis	kyle	lewis	2014-07-31	Male	1994-04-18	22	Less than 25	Caucasian	0	3	0	0	0	0	2014-07-31 02:05:33	2014-07-31 08:33:42	14011646MM10A	2014-07-31		0	(M1)	Battery	0									0					Risk of Recidivism	3	Low	2014-07-31	Risk of Violence	5	Medium	2014-07-31	2014-07-31	2014-07-31	0	0
18	jarrod turbe	jarrod	turbe	2013-10-09	Male	1974-12-02	41	25 - 45	African-American	0	4	0	0	0	-1	2013-10-08 11:53:09	2013-10-09 02:16:51	13014121CF10A	2013-10-08		1	(F3)	Poss3,4 Methylenedioxymethcath	0									0					Risk of Recidivism	4	Low	2013-10-09	Risk of Violence	2	Low	2013-10-09	2013-10-08	2013-10-09	0	0
19	craig gilbert	craig	gilbert	2013-10-30	Female	1968-06-14	47	Greater than 45	Caucasian	0	1	0	0	1	-20	2013-10-10 05:12:58	2013-10-24 11:30:00	12000212CF10A		2012-06-27	490	(F3)	arrest case no charge	1	14007704CF10A	(F3)	0	2014-06-03	Grand Theft (Motor Vehicle)	2014-06-03	2014-11-19		0					Risk of Recidivism	1	Low	2013-10-30	Risk of Violence	1	Low	2013-10-30	2014-06-03	2014-11-19	1	0
20	samuel seraphin	samuel	seraphin	2014-06-03	Male	1985-03-25	31	25 - 45	African-American	0	3	0	0	7	22	2014-06-25 02:15:57	2014-06-28 05:02:21	14004186CF10A	2014-03-24		71	(F3)	Felony Driving While Lic Suspd	1	14009921MM10A	(M1)	0	2014-06-25	Criminal Mischief>$200<$1000	2014-06-25	2014-06-28		0					Risk of Recidivism	3	Low	2014-06-03	Risk of Violence	2	Low	2014-06-03	2014-06-25	2014-06-28	7	0
21	mario hernandez	mario	hernandez	2014-03-24	Male	1979-01-25	37	25 - 45	Hispanic	0	1	0	0	0	0	2014-03-24 03:20:57	2014-03-24 09:09:10	14005100MM10A	2014-03-24		0	(M1)	Battery	0									0					Risk of Recidivism	1	Low	2014-03-24	Risk of Violence	1	Low	2014-03-24	2014-03-24	2014-03-24	0	0
22	darrious davis	darrious	davis	2013-12-22	Male	1990-06-22	25	25 - 45	African-American	0	10	0	0	3	-1	2013-12-21 05:42:02	2013-12-22 09:11:18	13017598CF10A	2013-12-21		1	(F3)	Grand Theft in the 3rd Degree	0									0					Risk of Recidivism	10	High	2013-12-22	Risk of Violence	9	High	2013-12-22	2015-03-30	2015-05-31	3	0
22	darrious davis	darrious	davis	2013-12-22	Male	1990-06-22	25	25 - 45	African-American	0	10	0	0	3	-1	2013-12-21 05:42:02	2013-12-22 09:11:18	13017598CF10A	2013-12-21		1	(F3)	Grand Theft in the 3rd Degree	0									0					Risk of Recidivism	10	High	2013-12-22	Risk of Violence	9	High	2013-12-22	2015-03-30	2015-05-31	3	525
23	neil heckart	neil	heckart	2013-11-17	Male	1984-12-24	31	25 - 45	Caucasian	0	5	0	0	6	-1	2013-11-16 07:12:12	2013-11-17 08:28:54	13015941CF10A	2013-11-16		1	(F3)	Driving While License Revoked	1	14010409CF10A	(F3)		2014-07-16	Grand Theft in the 3rd Degree				1	14010409CF10A	(F1)	2014-07-16	Kidnapping (Facilitate Felony)	Risk of Recidivism	5	Medium	2013-11-17	Risk of Violence	4	Low	2013-11-17	2013-11-16	2013-11-17	6	0
24	michael lux	michael	lux	2014-11-15	Male	1985-01-08	31	25 - 45	Caucasian	0	3	0	0	5	-1	2014-11-14 01:37:05	2014-11-15 04:57:04	14015346CF10A	2014-11-14		1	(F3)	Possession Of Heroin	1	15005595CF10A	(F3)	1	2015-04-27	Possession of Cocaine	2015-04-28	2015-06-01		0					Risk of Recidivism	3	Low	2014-11-15	Risk of Violence	2	Low	2014-11-15	2016-02-16	2016-03-18	5	0
25	columbus wilson	columbus	wilson	2014-05-02	Male	1951-06-28	64	Greater than 45	African-American	0	6	0	0	13	-1	2014-05-01 06:49:08	2014-05-02 09:28:02	14006083CF10A		2014-05-01	1	(F3)	arrest case no charge	1	14006189CF10A	(F2)	0	2014-05-03	Poss Cocaine/Intent To Del/Sel	2014-05-03	2014-05-04		0					Risk of Recidivism	6	Medium	2014-05-02	Risk of Violence	3	Low	2014-05-02	2014-05-03	2014-05-04	13	0
26	vandivuiet williams	vandivuiet	williams	2013-04-18	Male	1994-11-29	21	Less than 25	African-American	0	9	0	0	1	-1	2013-04-17 01:40:58	2013-04-20 04:19:42	13005492CF10A	2013-04-17		1	(F3)	Battery on Law Enforc Officer	1	13009581MM10A	(M2)	0	2013-05-18	Prowling/Loitering	2013-05-18	2013-05-19		0					Risk of Recidivism	9	High	2013-04-18	Risk of Violence	9	High	2013-04-18	2013-05-18	2013-05-19	1	2
27	nelson avalo	nelson	avalo	2014-10-16	Male	1988-08-06	27	25 - 45	Caucasian	0	2	0	0	0	0	2014-10-16 05:43:29	2014-10-16 12:40:42	14013962CF10A	2014-10-16		0	(M1)	Possession Of Methamphetamine	1	15003574TC30A	(M2)		2015-01-05	Operating W/O Valid License				0					Risk of Recidivism	2	Low	2014-10-16	Risk of Violence	3	Low	2014-10-16	2014-10-16	2014-10-16	0	0
28	janel denicola	janel	denicola	2013-11-22	Female	1995-03-22	21	Less than 25	Caucasian	0	4	0	0	0	-2	2013-11-20 04:12:09	2013-11-21 07:53:21	13016112CF10A	2013-11-20		2	(F3)	Introduce Contraband Into Jail	0									0					Risk of Recidivism	4	Low	2013-11-22	Risk of Violence	5	Medium	2013-11-22	2013-11-20	2013-11-21	0	0
29	jeremiah joseph	jeremiah	joseph	2014-10-16	Male	1991-08-29	24	Less than 25	African-American	0	-1	0	0	2	0	2014-10-16 02:13:30	2014-10-17 03:38:48	14013974CF10A	2014-10-16		0	(F3)	Poss Pyrrolidinovalerophenone	1	15000162MM30A	(M2)		2015-01-12	Petit Theft				0					Risk of Recidivism	-1	N/A	2014-10-16	Risk of Violence	6	Medium	2014-10-16	2014-10-16	2014-10-17	2	1
30	dominic pabon	dominic	pabon	2013-02-08	Male	1992-01-23	24	Less than 25	Hispanic	0	4	0	0	1	0	2013-02-08 04:50:02	2013-02-09 04:43:17	13001998CF10A	2013-02-07		1	(F3)	Lewd/Lasc Battery Pers 12+/<16	1	14001650MM40A	(M1)		2014-03-26	Possess Cannabis/20 Grams Or Less				0					Risk of Recidivism	4	Low	2013-02-08	Risk of Violence	5	Medium	2013-02-08	2013-02-08	2013-02-09	1	1
31	anthony laporta	anthony	laporta	2014-12-03	Male	1973-07-07	42	25 - 45	Caucasian	0	3	0	0	1	-132	2014-07-24 12:09:29	2014-11-06 05:57:36	14010046CF10A	2014-07-23		133	(F1)	Trafficking In Methamphetamine	0									0					Risk of Recidivism	3	Low	2014-12-03	Risk of Violence	1	Low	2014-12-03	2014-07-24	2014-11-06	1	0
32	russell sottile	russell	sottile	2013-01-25	Male	1973-01-10	43	25 - 45	Caucasian	0	1	0	0	1	-1	2013-01-24 03:43:22	2013-01-25 09:12:10	13003773TC10A	2013-01-24		1	(M2)	Susp Drivers Lic 1st Offense	0									0					Risk of Recidivism	1	Low	2013-01-25	Risk of Violence	2	Low	2013-01-25	2013-01-24	2013-01-25	1	0
33	andre ashley	andre	ashley	2013-05-11	Male	1983-08-24	32	25 - 45	Other	0	3	0	0	0	-1	2013-05-10 08:38:16	2013-05-12 03:33:36	13009088MM10A	2013-05-10		1	(M1)	Battery	0									0					Risk of Recidivism	3	Low	2013-05-11	Risk of Violence	4	Low	2013-05-11	2013-05-10	2013-05-12	0	1
34	bernice marion	bernice	marion	2013-05-24	Female	1962-02-16	54	Greater than 45	African-American	0	9	0	0	0	-1	2013-05-23 07:25:37	2013-09-11 05:51:06	13007351CF10A	2013-05-23		1	(F3)	Poss3,4 Methylenedioxymethcath	0									0					Risk of Recidivism	9	High	2013-05-24	Risk of Violence	5	Medium	2013-05-24	2013-09-11	2020-01-01	0	1043
35	michael thompson	michael	thompson	2014-08-21	Male	1972-01-19	44	25 - 45	African-American	0	6	0	0	8	0	2014-08-21 03:56:39	2014-08-21 08:30:05	02046989TC30A		2002-11-16	4296	(M2)	arrest case no charge	0									0					Risk of Recidivism	6	Medium	2014-08-21	Risk of Violence	4	Low	2014-08-21	2014-08-21	2014-08-21	8	0
37	deandrae counts	deandrae	counts	2013-05-06	Male	1989-02-08	27	25 - 45	African-American	0	3	0	0	8	-1	2013-05-05 09:07:10	2013-05-22 09:08:22	13006419CF10A	2013-05-05		1	(F3)	Carrying Concealed Firearm	1	14001039TC10A	(M2)		2013-11-06	Driving License Suspended				1	15002479CF10A	(F3)	2015-02-23	Felony Battery	Risk of Recidivism	3	Low	2013-05-06	Risk of Violence	3	Low	2013-05-06	2013-08-30	2013-08-31	8	16
37	deandrae counts	deandrae	counts	2013-05-06	Male	1989-02-08	27	25 - 45	African-American	0	3	0	0	8	-1	2013-05-05 09:07:10	2013-05-22 09:08:22	13006419CF10A	2013-05-05		1	(F3)	Carrying Concealed Firearm	1	14001039TC10A	(M2)		2013-11-06	Driving License Suspended				1	15002479CF10A	(F3)	2015-02-23	Felony Battery	Risk of Recidivism	3	Low	2013-05-06	Risk of Violence	3	Low	2013-05-06	2013-08-30	2013-08-31	8	117
38	victoria soltau	victoria	soltau	2013-03-18	Female	1979-09-03	36	25 - 45	Caucasian	0	3	0	0	3	53	2013-05-10 11:15:09	2013-05-11 07:01:59	12018170CF10A		2012-12-13	95	(F3)	arrest case no charge	0									0					Risk of Recidivism	3	Low	2013-03-18	Risk of Violence	1	Low	2013-03-18	2013-05-10	2013-05-11	3	0
38	victoria soltau	victoria	soltau	2013-03-18	Female	1979-09-03	36	25 - 45	Caucasian	0	3	0	0	3	53	2013-05-10 11:15:09	2013-05-11 07:01:59	12018170CF10A		2012-12-13	95	(F3)	arrest case no charge	0									0					Risk of Recidivism	3	Low	2013-03-18	Risk of Violence	1	Low	2013-03-18	2013-05-10	2013-05-11	3	54
39	najee sapp	najee	sapp	2013-02-20	Male	1989-04-27	26	25 - 45	African-American	0	7	0	1	5	-1	2013-02-19 07:47:55	2013-02-20 06:33:11	13002542CF10A	2013-02-19		1	(F3)	Pos Cannabis W/Intent Sel/Del	1	14011400MM10A	(M1)	0	2014-07-26	Possess Cannabis/20 Grams Or Less	2014-07-26	2014-08-22		0					Risk of Recidivism	7	Medium	2013-02-20	Risk of Violence	7	Medium	2013-02-20	2014-03-18	2014-03-26	5	0
39	najee sapp	najee	sapp	2013-02-20	Male	1989-04-27	26	25 - 45	African-American	0	7	0	1	5	-1	2013-02-19 07:47:55	2013-02-20 06:33:11	13002542CF10A	2013-02-19		1	(F3)	Pos Cannabis W/Intent Sel/Del	1	14011400MM10A	(M1)	0	2014-07-26	Possess Cannabis/20 Grams Or Less	2014-07-26	2014-08-22		0					Risk of Recidivism	7	Medium	2013-02-20	Risk of Violence	7	Medium	2013-02-20	2014-07-26	2014-08-22	5	399
40	victor moreno	victor	moreno	2014-10-24	Male	1983-02-03	33	25 - 45	African-American	0	10	0	0	0	0	2014-10-24 12:50:50	2014-12-01 07:49:53	14014284CF10A	2014-10-23		1	(F3)	Tampering With Physical Evidence	1	15010523CF10A	(F3)		2015-08-15	False Imprisonment				1	15010523CF10A	(M1)	2015-08-15	Battery	Risk of Recidivism	10	High	2014-10-24	Risk of Violence	6	Medium	2014-10-24	2015-05-27	2015-06-17	0	38
40	victor moreno	victor	moreno	2014-10-24	Male	1983-02-03	33	25 - 45	African-American	0	10	0	0	0	0	2014-10-24 12:50:50	2014-12-01 07:49:53	14014284CF10A	2014-10-23		1	(F3)	Tampering With Physical Evidence	1	15010523CF10A	(F3)		2015-08-15	False Imprisonment				1	15010523CF10A	(M1)	2015-08-15	Battery	Risk of Recidivism	10	High	2014-10-24	Risk of Violence	6	Medium	2014-10-24	2015-05-27	2015-06-17	0	236
41	william pirkle	william	pirkle	2013-01-28	Male	1985-10-17	30	25 - 45	Caucasian	0	9	0	0	9	0	2013-01-28 02:28:42	2013-03-13 07:32:52	13001372CF10A	2013-01-28		0	(F3)	Felony Battery w/Prior Convict	1	13009605CF10A	(F3)	0	2013-07-09	Grand Theft (Motor Vehicle)	2013-07-09	2013-07-10		0					Risk of Recidivism	9	High	2013-01-28	Risk of Violence	10	High	2013-01-28	2013-07-09	2013-07-10	9	44
42	maslin brutus	maslin	brutus	2014-11-15	Male	1984-03-16	32	25 - 45	African-American	0	8	0	0	4	-1	2014-11-14 03:07:02	2014-11-15 04:56:55	14015347CF10A	2014-11-14		1	(F3)	Att Tamper w/Physical Evidence	1	14015680CF10A	(M1)	1	2014-11-21	Resist/Obstruct W/O Violence	2014-11-22	2014-11-24		0					Risk of Recidivism	8	High	2014-11-15	Risk of Violence	3	Low	2014-11-15	2014-11-22	2014-11-24	4	0
43	barrington figueroa	barrington	figueroa	2014-12-07	Male	1952-08-27	63	Greater than 45	African-American	0	1	0	0	0	-1	2014-12-06 07:42:33	2014-12-08 04:02:00	14017210MM10A	2014-12-06		1	(M1)	Battery	0									0					Risk of Recidivism	1	Low	2014-12-07	Risk of Violence	1	Low	2014-12-07	2014-12-06	2014-12-08	0	1
44	jorge correa	jorge	correa	2014-11-21	Male	1989-01-03	27	25 - 45	Hispanic	0	3	0	0	2	0	2014-11-21 01:19:46	2014-11-21 02:08:38	14015619CF10A	2014-11-20		1	(F3)	Possession of Cocaine	0									0					Risk of Recidivism	3	Low	2014-11-21	Risk of Violence	3	Low	2014-11-21	2014-11-21	2014-11-21	2	0
45	mark friedland	mark	friedland	2013-12-30	Male	1960-07-27	55	Greater than 45	Caucasian	0	1	0	0	0	-1	2013-12-29 06:37:02	2013-12-31 10:29:24	13017946CF10A		2013-12-29	1	(F3)	arrest case no charge	0									0					Risk of Recidivism	1	Low	2013-12-30	Risk of Violence	1	Low	2013-12-30	2013-12-29	2013-12-31	0	1
47	leon jumpp	leon	jumpp	2013-09-16	Male	1983-08-03	32	25 - 45	African-American	0	10	0	0	15	0	2013-09-16 01:36:50	2013-12-17 06:21:28	13013077CF10A	2013-09-16		0	(F3)	Felony Petit Theft	0									0					Risk of Recidivism	10	High	2013-09-16	Risk of Violence	8	High	2013-09-16	2013-12-17	2014-07-26	15	313
48	michael garcia	michael	garcia	2014-01-11	Male	1977-08-07	38	25 - 45	African-American	0	3	0	2	5	-1	2014-01-10 10:18:46	2014-06-25 03:27:12	14000449CF10A	2014-01-10		1	(F3)	Burglary Structure Assault/Batt	0									0					Risk of Recidivism	3	Low	2014-01-11	Risk of Violence	4	Low	2014-01-11	2015-04-28	2015-04-29	5	165
48	michael garcia	michael	garcia	2014-01-11	Male	1977-08-07	38	25 - 45	African-American	0	3	0	2	5	-1	2014-01-10 10:18:46	2014-06-25 03:27:12	14000449CF10A	2014-01-10		1	(F3)	Burglary Structure Assault/Batt	0									0					Risk of Recidivism	3	Low	2014-01-11	Risk of Violence	4	Low	2014-01-11	2015-05-27	2015-06-05	5	473
48	michael garcia	michael	garcia	2014-01-11	Male	1977-08-07	38	25 - 45	African-American	0	3	0	2	5	-1	2014-01-10 10:18:46	2014-06-25 03:27:12	14000449CF10A	2014-01-10		1	(F3)	Burglary Structure Assault/Batt	0									0					Risk of Recidivism	3	Low	2014-01-11	Risk of Violence	4	Low	2014-01-11	2015-05-27	2015-06-05	5	510
49	kevin mcmanus	kevin	mcmanus	2013-01-20	Male	1962-08-03	53	Greater than 45	Caucasian	0	5	0	0	19	-1	2013-01-19 06:46:23	2013-01-25 03:31:33	13000892CF10A	2013-01-19		1	(F3)	Fel Drive License Perm Revoke	0									0					Risk of Recidivism	5	Medium	2013-01-20	Risk of Violence	2	Low	2013-01-20	2014-04-25	2014-05-08	19	5
49	kevin mcmanus	kevin	mcmanus	2013-01-20	Male	1962-08-03	53	Greater than 45	Caucasian	0	5	0	0	19	-1	2013-01-19 06:46:23	2013-01-25 03:31:33	13000892CF10A	2013-01-19		1	(F3)	Fel Drive License Perm Revoke	0									0					Risk of Recidivism	5	Medium	2013-01-20	Risk of Violence	2	Low	2013-01-20	2014-05-08	2020-01-01	19	1167
50	maurice watson	maurice	watson	2013-04-04	Male	1966-07-27	49	Greater than 45	Other	0	3	0	0	7	-1	2013-04-03 04:47:14	2013-04-07 02:54:34	13004763CF10A	2013-04-04		0	(F3)	Agg Fleeing and Eluding	1	15000545MM20A	(M1)		2015-01-23	Possess Cannabis/20 Grams Or Less				0					Risk of Recidivism	3	Low	2013-04-04	Risk of Violence	2	Low	2013-04-04	2014-08-19	2014-08-20	7	3
50	maurice watson	maurice	watson	2013-04-04	Male	1966-07-27	49	Greater than 45	Other	0	3	0	0	7	-1	2013-04-03 04:47:14	2013-04-07 02:54:34	13004763CF10A	2013-04-04		0	(F3)	Agg Fleeing and Eluding	1	15000545MM20A	(M1)		2015-01-23	Possess Cannabis/20 Grams Or Less				0					Risk of Recidivism	3	Low	2013-04-04	Risk of Violence	2	Low	2013-04-04	2014-08-19	2014-08-20	7	503
51	kurt fowks	kurt	fowks	2013-04-09	Male	1990-02-11	26	25 - 45	Caucasian	0	8	0	2	6	81	2013-06-29 06:05:49	2013-07-11 09:02:10	12022229TC10A	2012-03-23		382	(M2)	Operating W/O Valid License	0									0					Risk of Recidivism	8	High	2013-04-09	Risk of Violence	8	High	2013-04-09	2013-06-29	2013-07-11	6	0
51	kurt fowks	kurt	fowks	2013-04-09	Male	1990-02-11	26	25 - 45	Caucasian	0	8	0	2	6	81	2013-06-29 06:05:49	2013-07-11 09:02:10	12022229TC10A	2012-03-23		382	(M2)	Operating W/O Valid License	0									0					Risk of Recidivism	8	High	2013-04-09	Risk of Violence	8	High	2013-04-09	2014-09-26	2014-11-06	6	93
51	kurt fowks	kurt	fowks	2013-04-09	Male	1990-02-11	26	25 - 45	Caucasian	0	8	0	2	6	81	2013-06-29 06:05:49	2013-07-11 09:02:10	12022229TC10A	2012-03-23		382	(M2)	Operating W/O Valid License	0									0					Risk of Recidivism	8	High	2013-04-09	Risk of Violence	8	High	2013-04-09	2014-09-26	2014-11-06	6	576
52	michael tritsch	michael	tritsch	2013-12-03	Female	1983-02-02	33	25 - 45	Caucasian	0	5	0	0	4	-1	2013-12-02 01:48:34	2013-12-13 05:25:42	13022426MM10A	2013-12-02		1	(M1)	Battery	1	14012292CF10A	(F3)	57	2014-07-14	Grand Theft in the 3rd Degree	2014-09-09	2014-09-10		0					Risk of Recidivism	5	Medium	2013-12-03	Risk of Violence	2	Low	2013-12-03	2013-12-02	2013-12-13	4	10
53	brooks nunez	brooks	nunez	2013-09-15	Male	1991-05-14	24	Less than 25	Caucasian	0	2	0	0	1	0	2013-09-15 03:47:52	2013-09-16 06:50:10	13017557MM10A	2013-09-15		0	(M1)	Battery	1	14006651CF10A	(F3)	0	2014-05-13	Possession of Cannabis	2014-05-13	2014-05-16		0					Risk of Recidivism	2	Low	2013-09-15	Risk of Violence	3	Low	2013-09-15	2014-05-13	2014-05-16	1	1
54	walter atwell	walter	atwell	2013-01-11	Male	1981-06-01	34	25 - 45	African-American	2	9	1	3	21	0	2013-01-11 02:19:35	2013-02-13 09:33:11	13000496CF10A	2013-01-11		0	(F2)	Poss Wep Conv Felon	1	14009119MM10A	(M1)	0	2014-06-09	Unlaw Use False Name/Identity	2014-06-09	2014-12-04		0					Risk of Recidivism	9	High	2013-01-11	Risk of Violence	6	Medium	2013-01-11	2014-06-09	2014-12-04	21	33
55	darling madrano	darling	madrano	2013-01-16	Male	1987-04-10	29	25 - 45	Caucasian	0	2	0	0	0	0	2013-01-16 12:44:00	2013-01-16 06:49:32	13000997MM10A	2013-01-15		1	(M1)	Possess Cannabis/20 Grams Or Less	0									0					Risk of Recidivism	2	Low	2013-01-16	Risk of Violence	2	Low	2013-01-16	2013-01-16	2013-01-16	0	0
56	kiante slocum	kiante	slocum	2013-08-24	Female	1994-08-17	21	Less than 25	African-American	0	8	0	0	2	-1	2013-08-23 10:37:03	2013-11-11 04:30:55	13011710CF10A		2013-08-23	1	(F2)	arrest case no charge	0									0					Risk of Recidivism	8	High	2013-08-24	Risk of Violence	8	High	2013-08-24	2015-01-30	2015-01-31	2	79
56	kiante slocum	kiante	slocum	2013-08-24	Female	1994-08-17	21	Less than 25	African-American	0	8	0	0	2	-1	2013-08-23 10:37:03	2013-11-11 04:30:55	13011710CF10A		2013-08-23	1	(F2)	arrest case no charge	0									0					Risk of Recidivism	8	High	2013-08-24	Risk of Violence	8	High	2013-08-24	2015-06-09	2015-06-12	2	525
56	kiante slocum	kiante	slocum	2013-08-24	Female	1994-08-17	21	Less than 25	African-American	0	8	0	0	2	-1	2013-08-23 10:37:03	2013-11-11 04:30:55	13011710CF10A		2013-08-23	1	(F2)	arrest case no charge	0									0					Risk of Recidivism	8	High	2013-08-24	Risk of Violence	8	High	2013-08-24	2015-09-08	2015-09-12	2	657
56	kiante slocum	kiante	slocum	2013-08-24	Female	1994-08-17	21	Less than 25	African-American	0	8	0	0	2	-1	2013-08-23 10:37:03	2013-11-11 04:30:55	13011710CF10A		2013-08-23	1	(F2)	arrest case no charge	0									0					Risk of Recidivism	8	High	2013-08-24	Risk of Violence	8	High	2013-08-24	2015-09-08	2015-09-12	2	749
57	porfirio zamot	porfirio	zamot	2013-02-28	Male	1964-11-24	51	Greater than 45	African-American	0	1	0	0	2	-1	2013-02-27 04:44:18	2013-02-28 08:01:39	13004096MM10A	2013-02-27		1	(M1)	Unlaw Use False Name/Identity	0									0					Risk of Recidivism	1	Low	2013-02-28	Risk of Violence	1	Low	2013-02-28	2013-02-27	2013-02-28	2	0
59	moises miranda	moises	miranda	2014-04-06	Male	1986-06-27	29	25 - 45	Caucasian	0	2	0	0	2	-1	2014-04-05 08:45:01	2014-04-06 01:46:41	14005804MM10A	2014-04-05		1	(M1)	Viol Injunct Domestic Violence	1	14009508MM10A	(M1)	0	2014-06-17	Viol Pretrial Release Dom Viol	2014-06-17	2014-06-18		0					Risk of Recidivism	2	Low	2014-04-06	Risk of Violence	2	Low	2014-04-06	2014-06-17	2014-06-18	2	0
60	akeem henry	akeem	henry	2013-08-23	Male	1991-03-23	25	25 - 45	African-American	0	6	0	0	0	-1	2013-08-22 10:16:10	2014-05-21 02:37:14	13011804CF10A	2013-08-22		1	(F2)	Burglary Unoccupied Dwelling	0									0					Risk of Recidivism	6	Medium	2013-08-23	Risk of Violence	7	Medium	2013-08-23	2015-02-24	2015-02-25	0	271
60	akeem henry	akeem	henry	2013-08-23	Male	1991-03-23	25	25 - 45	African-American	0	6	0	0	0	-1	2013-08-22 10:16:10	2014-05-21 02:37:14	13011804CF10A	2013-08-22		1	(F2)	Burglary Unoccupied Dwelling	0									0					Risk of Recidivism	6	Medium	2013-08-23	Risk of Violence	7	Medium	2013-08-23	2015-02-24	2015-02-25	0	551
61	brenda plummer	brenda	plummer	2013-02-14	Female	1964-11-11	51	Greater than 45	African-American	0	2	0	0	7	-1	2013-02-13 09:29:56	2013-02-15 01:35:37	13002244CF10A	2013-02-13		1	(F3)	Possession of Cocaine	0									0					Risk of Recidivism	2	Low	2013-02-14	Risk of Violence	2	Low	2013-02-14	2014-07-28	2014-08-05	7	1
61	brenda plummer	brenda	plummer	2013-02-14	Female	1964-11-11	51	Greater than 45	African-American	0	2	0	0	7	-1	2013-02-13 09:29:56	2013-02-15 01:35:37	13002244CF10A	2013-02-13		1	(F3)	Possession of Cocaine	0									0					Risk of Recidivism	2	Low	2013-02-14	Risk of Violence	2	Low	2013-02-14	2014-07-28	2014-08-05	7	537
62	cody wiggins	cody	wiggins	2014-09-14	Male	1988-02-15	28	25 - 45	Caucasian	0	7	0	0	8	0	2014-09-14 01:10:11	2014-09-15 03:16:00	14012449CF10A	2014-09-14		0	(F3)	Possession of Cocaine	0									0					Risk of Recidivism	7	Medium	2014-09-14	Risk of Violence	4	Low	2014-09-14	2014-09-14	2014-09-15	8	1
63	damieth richardson	damieth	richardson	2014-08-13	Male	1979-12-28	36	25 - 45	African-American	0	9	0	0	22	-1	2014-08-12 03:23:29	2015-02-25 11:44:57	14011021CF10A	2014-08-12		1	(M1)	Burglary Dwelling Occupied	0									0					Risk of Recidivism	9	High	2014-08-13	Risk of Violence	10	High	2014-08-13	2016-01-28	2016-01-29	22	196
63	damieth richardson	damieth	richardson	2014-08-13	Male	1979-12-28	36	25 - 45	African-American	0	9	0	0	22	-1	2014-08-12 03:23:29	2015-02-25 11:44:57	14011021CF10A	2014-08-12		1	(M1)	Burglary Dwelling Occupied	0									0					Risk of Recidivism	9	High	2014-08-13	Risk of Violence	10	High	2014-08-13	2016-01-28	2016-01-29	22	534
64	derrick mims	derrick	mims	2014-03-03	Male	1987-03-03	29	25 - 45	African-American	0	7	0	0	0	0	2014-03-03 04:28:58	2014-03-03 09:10:41	14003004CF10A	2014-03-03		0	(F3)	Defrauding Innkeeper $300/More	1	14007343MM10A	(M1)	1	2014-05-03	Viol Injunct Domestic Violence	2014-05-04	2014-06-09		0					Risk of Recidivism	7	Medium	2014-03-03	Risk of Violence	2	Low	2014-03-03	2014-09-04	2014-10-02	0	0
65	jean jeangilles	jean	jeangilles	2014-06-19	Male	1986-12-06	29	25 - 45	Other	0	1	0	0	0	-1	2014-06-18 05:28:46	2014-06-20 01:43:08	14009570MM10A	2014-06-17		2	(M1)	Battery	0									0					Risk of Recidivism	1	Low	2014-06-19	Risk of Violence	2	Low	2014-06-19	2014-06-18	2014-06-20	0	1
66	jeffery dowdy	jeffery	dowdy	2014-03-28	Male	1990-05-28	25	25 - 45	Caucasian	0	10	0	0	9	-1	2014-03-27 10:17:55	2014-04-03 09:27:42	14005313MM10A	2014-03-27		1	(M1)	Battery	1	14004719CF10A	(F2)	0	2014-04-05	Agg Battery Grt/Bod/Harm	2014-04-05	2014-04-14		1	14004719CF10A	(F2)	2014-04-05	Agg Battery Grt/Bod/Harm	Risk of Recidivism	10	High	2014-03-28	Risk of Violence	9	High	2014-03-28	2014-04-05	2014-04-14	9	6
67	eddie jones	eddie	jones	2014-05-19	Male	1981-01-19	35	25 - 45	African-American	1	8	0	4	13	-1	2014-05-18 04:05:09	2014-05-19 01:47:37	14006899CF10A	2014-05-18		1	(F3)	Uttering a Forged Instrument	1	14008544MO10A	(MO3)	0	2014-05-28	DOC/Fighting/Threatening Words	2014-05-28	2014-05-29		1	14008544MO10A	(MO3)	2014-05-28	DOC/Fighting/Threatening Words	Risk of Recidivism	8	High	2014-05-19	Risk of Violence	3	Low	2014-05-19	2014-05-28	2014-05-29	13	0
68	michael harper	michael	harper	2013-08-02	Male	1967-02-19	49	Greater than 45	Caucasian	0	1	0	0	0	0	2013-08-02 04:43:01	2013-08-02 08:31:32	13014548MM10A	2013-08-02		0	(M1)	DUI Level 0.15 Or Minor In Veh	0									0					Risk of Recidivism	1	Low	2013-08-02	Risk of Violence	1	Low	2013-08-02	2013-08-02	2013-08-02	0	0
69	anthony bennett	anthony	bennett	2014-12-26	Male	1982-02-27	34	25 - 45	African-American	0	3	0	0	4	-59	2014-10-28 04:07:03	2014-12-18 09:54:29	14075628TC20A	2014-10-28		59	(M2)	Driving License Suspended	1	15051590TC20A	(M2)		2015-09-09	DWLS Canceled Disqul 1st Off				0					Risk of Recidivism	3	Low	2014-12-26	Risk of Violence	2	Low	2014-12-26	2014-10-28	2014-12-18	4	0
70	jeffrey pierre	jeffrey	pierre	2013-04-24	Male	1986-10-06	29	25 - 45	African-American	0	4	0	0	0	0	2013-04-24 04:28:24	2013-04-24 08:20:12	13005888CF10A	2013-04-23		1	(F3)	Tampering With Physical Evidence	0									0					Risk of Recidivism	4	Low	2013-04-24	Risk of Violence	3	Low	2013-04-24	2013-04-24	2013-04-24	0	0
71	joseph martorano	joseph	martorano	2013-06-03	Male	1986-07-30	29	25 - 45	Caucasian	0	2	0	0	1	-24	2013-05-10 05:18:38	2013-05-10 07:43:04	13006726CF10A	2013-05-10		24	(F3)	Possession of Oxycodone	1	14029973MU10A	(M1)	0	2014-08-18	Driving Under The Influence	2014-08-18	2014-08-18		0					Risk of Recidivism	2	Low	2013-06-03	Risk of Violence	2	Low	2013-06-03	2014-08-18	2014-08-18	1	0
71	joseph martorano	joseph	martorano	2013-06-03	Male	1986-07-30	29	25 - 45	Caucasian	0	2	0	0	1	-24	2013-05-10 05:18:38	2013-05-10 07:43:04	13006726CF10A	2013-05-10		24	(F3)	Possession of Oxycodone	1	14029973MU10A	(M1)	0	2014-08-18	Driving Under The Influence	2014-08-18	2014-08-18		0					Risk of Recidivism	2	Low	2013-06-03	Risk of Violence	2	Low	2013-06-03	2014-08-18	2014-08-18	1	441
72	shinell baxterskeffrey	shinell	baxterskeffrey	2013-11-18	Female	1987-09-29	28	25 - 45	Other	0	2	0	0	0	-1	2013-11-17 09:43:17	2013-11-18 08:03:35	13015965CF10A	2013-11-17		1	(F3)	Grand Theft in the 3rd Degree	0									0					Risk of Recidivism	2	Low	2013-11-18	Risk of Violence	2	Low	2013-11-18	2013-11-17	2013-11-18	0	0
73	edward hobaugh	edward	hobaugh	2014-10-05	Male	1965-01-16	51	Greater than 45	Caucasian	0	2	0	0	0	-1	2014-10-04 11:39:42	2014-10-29 09:58:11	14013388CF10A	2014-10-04		1	(F3)	Grand Theft in the 3rd Degree	0									0					Risk of Recidivism	2	Low	2014-10-05	Risk of Violence	1	Low	2014-10-05	2014-10-04	2014-10-29	0	24
74	vincent gilberti	vincent	gilberti	2014-06-03	Male	1990-08-22	25	25 - 45	Caucasian	0	3	0	0	0	0	2014-06-03 03:00:04	2014-06-03 08:23:18	14007684CF10A	2014-06-03		0	(F3)	Possession of Cocaine	0									0					Risk of Recidivism	3	Low	2014-06-03	Risk of Violence	3	Low	2014-06-03	2014-06-03	2014-06-03	0	0
75	elliott knauff	elliott	knauff	2013-05-02	Male	1967-05-01	48	Greater than 45	Caucasian	0	6	0	0	20	302	2014-02-28 11:19:21	2014-03-11 02:46:41	11010574CF10A		2011-10-18	562	(F3)	arrest case no charge	1	14000740MM20A	(M2)		2014-02-01	Trespass Struct/Conveyance				0					Risk of Recidivism	6	Medium	2013-05-02	Risk of Violence	4	Low	2013-05-02	2014-09-09	2020-01-01	20	0
76	alfredo martinez	alfredo	martinez	2014-10-24	Male	1982-12-30	33	25 - 45	Caucasian	0	9	0	0	1	0	2014-10-24 05:36:26	2014-10-25 03:19:50	14014354CF10A	2014-10-24		0	(F3)	Grand Theft Dwell Property	0									0					Risk of Recidivism	9	High	2014-10-24	Risk of Violence	10	High	2014-10-24	2015-03-06	2015-03-07	1	1
76	alfredo martinez	alfredo	martinez	2014-10-24	Male	1982-12-30	33	25 - 45	Caucasian	0	9	0	0	1	0	2014-10-24 05:36:26	2014-10-25 03:19:50	14014354CF10A	2014-10-24		0	(F3)	Grand Theft Dwell Property	0									0					Risk of Recidivism	9	High	2014-10-24	Risk of Violence	10	High	2014-10-24	2015-03-06	2015-03-07	1	134
77	graciela quevedo	graciela	quevedo	2014-01-22	Female	1952-08-15	63	Greater than 45	Hispanic	0	1	0	0	1	-219	2013-06-17 04:04:07	2013-06-25 08:31:09	13007023CF10A		2013-06-17	219	(F1)	arrest case no charge	0									0					Risk of Recidivism	1	Low	2014-01-22	Risk of Violence	1	Low	2014-01-22	2013-06-17	2013-06-25	1	0
78	gregory blount	gregory	blount	2014-11-03	Male	1985-07-24	30	25 - 45	African-American	0	6	0	1	3	-1	2014-11-02 11:52:16	2014-11-04 02:31:15	14014716CF10A	2014-11-02		1	(F3)	Possession of Cocaine	0									0					Risk of Recidivism	6	Medium	2014-11-03	Risk of Violence	4	Low	2014-11-03	2014-11-02	2014-11-04	3	1
79	mackenson nelson	mackenson	nelson	2013-03-18	Male	1984-09-24	31	25 - 45	African-American	0	5	0	1	15	-1	2013-03-17 09:02:33	2013-07-31 08:23:26	13003864CF10A	2013-03-17		1	(F2)	Attempt Armed Burglary Dwell	1	16006319TC10A	(M2)		2016-02-28	Operating W/O Valid License				0					Risk of Recidivism	5	Medium	2013-03-18	Risk of Violence	7	Medium	2013-03-18	2013-03-17	2013-07-31	15	135
80	trenton goldston	trenton	goldston	2013-09-18	Male	1991-10-07	24	Less than 25	African-American	0	4	0	0	2	-1	2013-09-17 07:19:20	2013-09-19 04:16:03	13013114CF10A	2013-09-17		1	(F3)	Poss Tetrahydrocannabinols	1	15004413MM10A	(M1)	1	2015-04-16	Possess Cannabis/20 Grams Or Less	2015-04-17	2015-04-17		0					Risk of Recidivism	4	Low	2013-09-18	Risk of Violence	4	Low	2013-09-18	2013-09-17	2013-09-19	2	1
81	bryant knight	bryant	knight	2014-11-08	Male	1988-05-05	27	25 - 45	African-American	0	5	0	0	0	-1	2014-11-07 09:08:30	2014-11-08 07:41:55	14014963CF10A	2014-11-07		1	(F3)	Felony Driving While Lic Suspd	0									0					Risk of Recidivism	5	Medium	2014-11-08	Risk of Violence	3	Low	2014-11-08	2014-11-07	2014-11-08	0	0
82	jimmy williams	jimmy	williams	2014-07-30	Male	1983-12-09	32	25 - 45	Caucasian	0	8	0	0	3	-1	2014-07-29 06:31:17	2014-07-30 08:15:10	14010319CF10A	2014-07-29		1	(F3)	Tampering With Physical Evidence	0									0					Risk of Recidivism	8	High	2014-07-30	Risk of Violence	2	Low	2014-07-30	2014-07-29	2014-07-30	3	0
83	jonny romerobarrientos	jonny	romerobarrientos	2013-01-20	Male	1986-01-11	30	25 - 45	Hispanic	0	7	0	0	0	0	2013-01-20 02:50:51	2013-02-12 09:16:13	13001388MM10A	2013-01-20		0	(M1)	Possess Cannabis/20 Grams Or Less	0									0					Risk of Recidivism	7	Medium	2013-01-20	Risk of Violence	3	Low	2013-01-20	2013-01-20	2013-02-12	0	23
84	rodney daniels	rodney	daniels	2013-08-27	Male	1967-01-23	49	Greater than 45	African-American	0	1	0	0	4	-1	2013-08-26 09:16:39	2013-08-27 06:57:19	13016325MM10A	2013-08-26		1	(M1)	Battery	0									0					Risk of Recidivism	1	Low	2013-08-27	Risk of Violence	1	Low	2013-08-27	2013-08-26	2013-08-27	4	0
85	walter olson	walter	olson	2013-05-28	Male	1962-12-07	53	Greater than 45	Caucasian	0	5	0	0	8	-13	2013-05-15 08:36:10	2013-05-28 10:06:35	13006695CF10A		2013-05-15	13	(F3)	arrest case no charge	0									0					Risk of Recidivism	5	Medium	2013-05-28	Risk of Violence	2	Low	2013-05-28	2013-05-15	2013-05-28	8	0
86	cynthia rivera	cynthia	rivera	2014-12-03	Female	1984-06-14	31	25 - 45	Hispanic	0	1	0	0	0	-1	2014-12-02 03:46:02	2014-12-02 08:24:25	14017033MM10A	2014-12-02		1	(M1)	Battery	0									0					Risk of Recidivism	1	Low	2014-12-03	Risk of Violence	1	Low	2014-12-03	2014-12-02	2014-12-02	0	0
87	ronald singletary	ronald	singletary	2013-02-11	Male	1980-06-04	35	25 - 45	African-American	0	3	0	0	5	-1	2013-02-10 07:44:42	2013-02-11 07:04:44	13002065CF10A	2013-02-10		1	(F3)	Driving While License Revoked	0									0					Risk of Recidivism	3	Low	2013-02-11	Risk of Violence	2	Low	2013-02-11	2013-02-10	2013-02-11	5	0
88	erwin mallard	erwin	mallard	2013-06-10	Male	1953-04-09	63	Greater than 45	African-American	0	7	0	0	10	-38	2013-05-03 09:19:41	2013-06-08 05:22:38	10027101MM10A	2010-12-17		906	(M1)	Possess Drug Paraphernalia	1	13016843MM10A	(M2)		2013-07-24	Petit Theft				0					Risk of Recidivism	7	Medium	2013-06-10	Risk of Violence	5	Medium	2013-06-10	2013-05-03	2013-06-08	10	0
89	ayushaun hairston	ayushaun	hairston	2014-04-14	Male	1982-08-30	33	25 - 45	African-American	0	1	0	0	2	-1	2014-04-13 07:50:17	2014-04-14 01:36:23	14005182CF10A	2014-04-13		1	(F2)	Agg Battery Grt/Bod/Harm	0									0					Risk of Recidivism	1	Low	2014-04-14	Risk of Violence	1	Low	2014-04-14	2014-04-13	2014-04-14	2	0
90	brett smith	brett	smith	2014-08-30	Male	1989-02-26	27	25 - 45	African-American	1	10	1	2	15	-1	2014-08-29 04:58:13	2014-08-30 08:38:48	14011789CF10A	2014-08-29		1	(F3)	Driving While License Revoked	1	14014938MM10A	(M1)	0	2014-10-13	Possess Cannabis/20 Grams Or Less	2014-10-13	2014-10-18		0					Risk of Recidivism	10	High	2014-08-30	Risk of Violence	9	High	2014-08-30	2014-10-13	2014-10-18	15	0
91	robert merlo	robert	merlo	2013-02-04	Male	1977-09-12	38	25 - 45	Caucasian	0	2	0	0	4	-1	2013-02-03 11:59:25	2013-02-05 11:05:50	13002432MM10A	2013-02-03		1	(M1)	Battery	1	13067394TC20A	(M2)		2013-11-03	Susp Drivers Lic 1st Offense				0					Risk of Recidivism	2	Low	2013-02-04	Risk of Violence	2	Low	2013-02-04	2013-02-03	2013-02-05	4	1
92	philip ciccarelli	philip	ciccarelli	2013-03-21	Male	1969-06-09	46	Greater than 45	Caucasian	3	6	1	0	9	-1	2013-03-20 04:00:43	2013-03-22 01:04:54	13004031CF10A	2013-03-20		1	(F3)	Grand Theft in the 3rd Degree	0									0					Risk of Recidivism	6	Medium	2013-03-21	Risk of Violence	3	Low	2013-03-21	2014-03-10	2014-03-18	9	1
92	philip ciccarelli	philip	ciccarelli	2013-03-21	Male	1969-06-09	46	Greater than 45	Caucasian	3	6	1	0	9	-1	2013-03-20 04:00:43	2013-03-22 01:04:54	13004031CF10A	2013-03-20		1	(F3)	Grand Theft in the 3rd Degree	0									0					Risk of Recidivism	6	Medium	2013-03-21	Risk of Violence	3	Low	2013-03-21	2014-03-18	2020-01-01	9	1107
93	omar wilson	omar	wilson	2013-11-16	Male	1993-06-13	22	Less than 25	African-American	0	4	0	1	1	-1	2013-11-15 06:56:49	2013-11-16 07:51:56	13015917CF10A	2013-11-15		1	(F3)	Poss Firearm W/Altered ID#	1	15000014MM40A	(M1)		2014-11-22	Possess Cannabis/20 Grams Or Less				0					Risk of Recidivism	4	Low	2013-11-16	Risk of Violence	6	Medium	2013-11-16	2013-11-15	2013-11-16	1	0
94	jamila pershadsingh	jamila	pershadsingh	2014-07-30	Female	1981-09-22	34	25 - 45	Caucasian	0	1	0	0	0	0	2014-07-30 02:23:25	2014-07-30 07:49:14	14011605MM10A	2014-07-30		0	(M1)	Battery	0									0					Risk of Recidivism	1	Low	2014-07-30	Risk of Violence	1	Low	2014-07-30	2014-07-30	2014-07-30	0	0
95	daquan davis	daquan	davis	2013-03-14	Male	1994-04-11	22	Less than 25	African-American	0	10	1	2	2	70	2013-05-23 01:31:00	2013-09-24 06:24:21	12017010CF10A	2012-11-20		114	(F3)	Sell Conterfeit Cont Substance	1	15009631MM10A	(M2)	0	2015-09-10	Susp Drivers Lic 1st Offense	2015-09-10	2015-12-08		0					Risk of Recidivism	10	High	2013-03-14	Risk of Violence	9	High	2013-03-14	2013-05-23	2013-09-24	2	0
95	daquan davis	daquan	davis	2013-03-14	Male	1994-04-11	22	Less than 25	African-American	0	10	1	2	2	70	2013-05-23 01:31:00	2013-09-24 06:24:21	12017010CF10A	2012-11-20		114	(F3)	Sell Conterfeit Cont Substance	1	15009631MM10A	(M2)	0	2015-09-10	Susp Drivers Lic 1st Offense	2015-09-10	2015-12-08		0					Risk of Recidivism	10	High	2013-03-14	Risk of Violence	9	High	2013-03-14	2015-09-10	2015-12-08	2	677
96	bradley quimbley	bradley	quimbley	2013-01-26	Male	1986-05-11	29	25 - 45	African-American	0	9	0	0	4	-1	2013-01-25 10:34:01	2013-02-13 09:36:41	13001227CF10A		2013-01-25	1	(F3)	arrest case no charge	1	13011976CF10A	(F3)		2013-08-23	Aggrav Stalking After Injunctn				0					Risk of Recidivism	9	High	2013-01-26	Risk of Violence	5	Medium	2013-01-26	2013-04-05	2013-07-12	4	18
96	bradley quimbley	bradley	quimbley	2013-01-26	Male	1986-05-11	29	25 - 45	African-American	0	9	0	0	4	-1	2013-01-25 10:34:01	2013-02-13 09:36:41	13001227CF10A		2013-01-25	1	(F3)	arrest case no charge	1	13011976CF10A	(F3)		2013-08-23	Aggrav Stalking After Injunctn				0					Risk of Recidivism	9	High	2013-01-26	Risk of Violence	5	Medium	2013-01-26	2013-04-05	2013-07-12	4	167
97	victor cabreramacias	victor	cabreramacias	2013-01-08	Male	1954-01-26	62	Greater than 45	Hispanic	0	1	0	0	0	0	2013-01-08 12:33:09	2013-01-08 09:41:28	13001092TC10A	2013-01-07		1	(M2)	Unlaw LicTag/Sticker Attach	0									0					Risk of Recidivism	1	Low	2013-01-08	Risk of Violence	1	Low	2013-01-08	2013-01-08	2013-01-08	0	0
98	daniel barnard	daniel	barnard	2014-04-30	Male	1988-07-05	27	25 - 45	African-American	0	6	1	0	6	0	2014-04-30 02:11:49	2014-05-30 04:59:14	14006018CF10A	2014-04-30		0	(F2)	Aggravated Battery / Pregnant	1	14015039CF10A	(F3)	0	2014-11-09	Possession of Cocaine	2014-11-09	2014-11-10		0					Risk of Recidivism	6	Medium	2014-04-30	Risk of Violence	3	Low	2014-04-30	2014-11-09	2014-11-10	6	30
99	hector hollis	hector	hollis	2014-03-09	Male	1983-02-19	33	25 - 45	Other	0	1	0	0	0	-1	2014-03-08 01:34:03	2014-03-09 10:21:45	14004045MM10A	2014-03-08		1	(M1)	Battery	0									0					Risk of Recidivism	1	Low	2014-03-09	Risk of Violence	1	Low	2014-03-09	2014-03-08	2014-03-09	0	0
100	merlita hanson	merlita	hanson	2013-09-28	Female	1960-01-03	56	Greater than 45	African-American	0	1	0	0	0	0	2013-09-28 02:52:18	2013-10-01 07:39:52	13018452MM10A	2013-09-27		1	(M1)	Battery	0									0					Risk of Recidivism	1	Low	2013-09-28	Risk of Violence	1	Low	2013-09-28	2013-09-28	2013-10-01	0	3
101	pedro rodriguez	pedro	rodriguez	2013-01-13	Male	1970-05-03	45	Greater than 45	Hispanic	0	1	0	0	6	-1	2013-01-12 05:43:00	2013-09-11 04:51:56	13000734CF10A	2013-01-12		1	(F3)	Possession of Cocaine	1	14005041TC10A	(M2)		2013-12-02	Operating W/O Valid License				1	14001759MM10A	(M1)	2014-02-01	Battery	Risk of Recidivism	1	Low	2013-01-13	Risk of Violence	1	Low	2013-01-13	2013-01-12	2013-09-11	6	241
102	andres bayas	andres	bayas	2013-05-25	Male	1993-10-16	22	Less than 25	Hispanic	0	4	0	0	1	-1	2013-05-24 06:06:17	2013-05-25 07:28:17	13007454CF10A	2013-05-24		1	(F3)	Burglary Structure Unoccup	0									0					Risk of Recidivism	4	Low	2013-05-25	Risk of Violence	6	Medium	2013-05-25	2013-05-24	2013-05-25	1	0
103	elizabeth nivar	elizabeth	nivar	2014-11-08	Female	1985-03-20	31	25 - 45	Caucasian	0	3	0	0	2	-1	2014-11-07 11:56:35	2014-11-08 08:12:11	14014973CF10A	2014-11-07		1	(F3)	Felony Driving While Lic Suspd	0									0					Risk of Recidivism	3	Low	2014-11-08	Risk of Violence	2	Low	2014-11-08	2014-11-07	2014-11-08	2	0
104	anthony higgs	anthony	higgs	2013-01-09	Male	1982-02-24	34	25 - 45	African-American	0	4	0	0	0	0	2013-01-09 04:31:05	2014-03-04 06:20:58	13000382CF10A	2013-01-09		0	(F3)	False Imprisonment	0									0					Risk of Recidivism	4	Low	2013-01-09	Risk of Violence	4	Low	2013-01-09	2014-03-04	2020-01-01	0	1178
105	alfonzo morgan	alfonzo	morgan	2013-03-07	Male	1976-11-11	39	25 - 45	African-American	0	4	0	0	1	-1	2013-03-06 11:23:53	2013-03-11 09:00:57	04018615MM10A		2013-03-06	1	(M1)	arrest case no charge	0									0					Risk of Recidivism	4	Low	2013-03-07	Risk of Violence	2	Low	2013-03-07	2013-03-06	2013-03-11	1	4
106	jw key	jw	key	2014-09-21	Male	1992-02-24	24	Less than 25	African-American	0	6	1	0	4	-1	2014-09-20 10:06:03	2014-09-21 07:02:01	14013973MM10A	2014-09-20		1	(M1)	Battery	0									0					Risk of Recidivism	6	Medium	2014-09-21	Risk of Violence	4	Low	2014-09-21	2014-09-20	2014-09-21	4	0
107	kennol placil	kennol	placil	2013-01-07	Male	1986-10-24	29	25 - 45	African-American	0	6	0	0	5	0	2013-01-07 02:12:47	2013-01-08 05:19:42	13000275CF10A	2013-01-07		0	(F3)	False Name By Person Arrest	1	13038900TC10A	(M2)	0	2013-09-17	Operating W/O Valid License	2013-09-17	2013-09-18		0					Risk of Recidivism	6	Medium	2013-01-07	Risk of Violence	3	Low	2013-01-07	2013-09-17	2013-09-18	5	1
108	anthony smith	anthony	smith	2014-12-03	Male	1989-03-27	27	25 - 45	Caucasian	0	6	0	1	1	-1	2014-12-02 03:23:28	2014-12-16 09:24:24	14014791CF10A		2014-12-02	1	(F3)	arrest case no charge	1	16002597CF10A	(F3)		2015-11-09	Pos Cannabis W/Intent Sel/Del				0					Risk of Recidivism	6	Medium	2014-12-03	Risk of Violence	3	Low	2014-12-03	2015-09-02	2015-10-30	1	13
108	anthony smith	anthony	smith	2014-12-03	Male	1989-03-27	27	25 - 45	Caucasian	0	6	0	1	1	-1	2014-12-02 03:23:28	2014-12-16 09:24:24	14014791CF10A		2014-12-02	1	(F3)	arrest case no charge	1	16002597CF10A	(F3)		2015-11-09	Pos Cannabis W/Intent Sel/Del				0					Risk of Recidivism	6	Medium	2014-12-03	Risk of Violence	3	Low	2014-12-03	2015-09-02	2015-10-30	1	331
110	sarai beas-gonzalez	sarai	beas-gonzalez	2014-10-29	Female	1991-04-24	24	Less than 25	Hispanic	0	4	0	0	1	-325	2013-12-08 09:05:13	2013-12-08 07:52:08	13022723MM10A	2013-12-08		325	(M2)	DUI Property Damage/Injury	0									0					Risk of Recidivism	4	Low	2014-10-29	Risk of Violence	2	Low	2014-10-29	2013-12-08	2013-12-08	1	0
111	phylipe raphael	phylipe	raphael	2013-07-17	Male	1976-03-27	40	25 - 45	African-American	0	2	0	0	2	-15	2013-07-02 03:42:01	2013-07-05 08:13:10	13007958CF10A		2013-07-02	15	(F3)	arrest case no charge	0									0					Risk of Recidivism	2	Low	2013-07-17	Risk of Violence	1	Low	2013-07-17	2013-07-02	2013-07-05	2	0
112	maurice lumpkin	maurice	lumpkin	2014-03-04	Male	1964-10-03	51	Greater than 45	African-American	0	1	0	0	1	-78	2013-12-16 11:12:56	2014-02-10 11:04:11	13016875CF10A		2013-12-16	78	(F3)	arrest case no charge	0									0					Risk of Recidivism	1	Low	2014-03-04	Risk of Violence	1	Low	2014-03-04	2014-06-05	2014-12-07	1	0
112	maurice lumpkin	maurice	lumpkin	2014-03-04	Male	1964-10-03	51	Greater than 45	African-American	0	1	0	0	1	-78	2013-12-16 11:12:56	2014-02-10 11:04:11	13016875CF10A		2013-12-16	78	(F3)	arrest case no charge	0									0					Risk of Recidivism	1	Low	2014-03-04	Risk of Violence	1	Low	2014-03-04	2014-06-05	2014-12-07	1	278
113	troy smith	troy	smith	2013-08-25	Male	1993-09-21	22	Less than 25	African-American	0	3	0	0	1	0	2013-08-25 12:07:09	2013-09-11 08:04:08	13016227MM10A	2013-08-24		1	(M1)	Battery	1	14068249TC40A	(M2)		2014-10-06	Driving License Suspended				0					Risk of Recidivism	3	Low	2013-08-25	Risk of Violence	3	Low	2013-08-25	2014-05-08	2014-05-29	1	17
113	troy smith	troy	smith	2013-08-25	Male	1993-09-21	22	Less than 25	African-American	0	3	0	0	1	0	2013-08-25 12:07:09	2013-09-11 08:04:08	13016227MM10A	2013-08-24		1	(M1)	Battery	1	14068249TC40A	(M2)		2014-10-06	Driving License Suspended				0					Risk of Recidivism	3	Low	2013-08-25	Risk of Violence	3	Low	2013-08-25	2014-07-12	2014-07-17	1	277
113	troy smith	troy	smith	2013-08-25	Male	1993-09-21	22	Less than 25	African-American	0	3	0	0	1	0	2013-08-25 12:07:09	2013-09-11 08:04:08	13016227MM10A	2013-08-24		1	(M1)	Battery	1	14068249TC40A	(M2)		2014-10-06	Driving License Suspended				0					Risk of Recidivism	3	Low	2013-08-25	Risk of Violence	3	Low	2013-08-25	2014-07-12	2014-07-17	1	326
114	james wickman	james	wickman	2013-02-19	Male	1993-10-12	22	Less than 25	Caucasian	0	8	0	0	0	-1	2013-02-18 12:24:07	2013-04-17 10:32:09	13002486CF10A	2013-02-18		1	(F3)	Grand Theft in the 3rd Degree	0									0					Risk of Recidivism	8	High	2013-02-19	Risk of Violence	6	Medium	2013-02-19	2013-05-03	2013-05-24	0	57
114	james wickman	james	wickman	2013-02-19	Male	1993-10-12	22	Less than 25	Caucasian	0	8	0	0	0	-1	2013-02-18 12:24:07	2013-04-17 10:32:09	13002486CF10A	2013-02-18		1	(F3)	Grand Theft in the 3rd Degree	0									0					Risk of Recidivism	8	High	2013-02-19	Risk of Violence	6	Medium	2013-02-19	2014-05-18	2014-05-22	0	94
114	james wickman	james	wickman	2013-02-19	Male	1993-10-12	22	Less than 25	Caucasian	0	8	0	0	0	-1	2013-02-18 12:24:07	2013-04-17 10:32:09	13002486CF10A	2013-02-18		1	(F3)	Grand Theft in the 3rd Degree	0									0					Risk of Recidivism	8	High	2013-02-19	Risk of Violence	6	Medium	2013-02-19	2014-08-25	2014-10-30	0	457
114	james wickman	james	wickman	2013-02-19	Male	1993-10-12	22	Less than 25	Caucasian	0	8	0	0	0	-1	2013-02-18 12:24:07	2013-04-17 10:32:09	13002486CF10A	2013-02-18		1	(F3)	Grand Theft in the 3rd Degree	0									0					Risk of Recidivism	8	High	2013-02-19	Risk of Violence	6	Medium	2013-02-19	2015-01-18	2015-07-15	0	618
114	james wickman	james	wickman	2013-02-19	Male	1993-10-12	22	Less than 25	Caucasian	0	8	0	0	0	-1	2013-02-18 12:24:07	2013-04-17 10:32:09	13002486CF10A	2013-02-18		1	(F3)	Grand Theft in the 3rd Degree	0									0					Risk of Recidivism	8	High	2013-02-19	Risk of Violence	6	Medium	2013-02-19	2015-01-18	2015-07-15	0	876
115	pentara casaberry	pentara	casaberry	2013-11-08	Female	1989-09-01	26	25 - 45	African-American	0	4	0	0	1	-1	2013-11-07 09:01:45	2013-11-09 09:07:50	13015554CF10A	2013-11-07		1	(F2)	Poss Cocaine/Intent To Del/Sel	1	13016053CF10A	(M1)	0	2013-11-19	Resist/Obstruct W/O Violence	2013-11-19	2014-01-16		1	13016053CF10A	(F3)	2013-11-19	Child Abuse	Risk of Recidivism	4	Low	2013-11-08	Risk of Violence	3	Low	2013-11-08	2013-11-19	2014-01-16	1	1
116	david meadows	david	meadows	2014-07-21	Male	1988-10-11	27	25 - 45	Caucasian	0	7	0	0	1	-43	2014-06-08 01:02:27	2014-06-27 09:37:41	14007902CF10A	2014-06-07		44	(F7)	Burglary Dwelling Assault/Batt	1	15007890CF10A	(M1)	24	2015-04-05	Felony Battery w/Prior Convict	2015-04-29	2015-05-17		1	15007890CF10A	(M1)	2015-04-05	Felony Battery w/Prior Convict	Risk of Recidivism	7	Medium	2014-07-21	Risk of Violence	8	High	2014-07-21	2015-06-29	2015-11-13	1	0
117	bertha klepach	bertha	klepach	2014-04-08	Female	1956-12-20	59	Greater than 45	African-American	0	1	0	0	2				13004461CF10A		2014-01-31	67	(F3)	arrest case no charge	0									0					Risk of Recidivism	1	Low	2014-04-08	Risk of Violence	1	Low	2014-04-08			2	0
118	jonathan chapman	jonathan	chapman	2014-04-15	Male	1983-09-07	32	25 - 45	Caucasian	0	1	0	0	3	-389	2013-03-22 10:41:11	2013-05-31 03:56:11	12009205MM10A	2012-05-04		711	(M1)	Driving Under The Influence	0									0					Risk of Recidivism	1	Low	2014-04-15	Risk of Violence	3	Low	2014-04-15	2013-03-22	2013-05-31	3	0
119	shawn thropes	shawn	thropes	2013-03-04	Male	1983-05-02	32	25 - 45	African-American	0	2	0	0	0	-1	2013-03-03 03:33:48	2013-03-04 07:08:59	13003199CF10A	2013-03-03		1	(F3)	Felony Battery (Dom Strang)	0									0					Risk of Recidivism	2	Low	2013-03-04	Risk of Violence	1	Low	2013-03-04	2013-03-03	2013-03-04	0	0
120	demetrious ellis	demetrious	ellis	2013-02-28	Male	1974-06-28	41	25 - 45	African-American	0	2	0	0	1	-1	2013-02-27 09:49:07	2013-03-01 01:59:16	95026071MM10A		1998-12-19	5185	(M2)	arrest case no charge	0									0					Risk of Recidivism	2	Low	2013-02-28	Risk of Violence	2	Low	2013-02-28	2013-02-27	2013-03-01	1	1
121	lawrence frank	lawrence	frank	2014-04-26	Male	1966-04-02	50	Greater than 45	Caucasian	0	1	0	0	0	-1	2014-04-25 11:34:30	2014-04-26 01:03:23	14006939MM10A	2014-04-25		1	(M1)	Battery	0									0					Risk of Recidivism	1	Low	2014-04-26	Risk of Violence	1	Low	2014-04-26	2014-04-25	2014-04-26	0	0
122	murvin thomas	murvin	thomas	2013-02-21	Male	1986-03-29	30	25 - 45	African-American	0	10	0	0	8	-1	2013-02-20 02:14:37	2013-02-21 07:47:06	13003606MM10A	2013-02-20		1	(M1)	Possess Cannabis/20 Grams Or Less	1	13005516CF10A	(M1)	0	2013-04-17	Possess Cannabis/20 Grams Or Less	2013-04-17	2013-04-18		1	15006514CF10A	(F3)	2015-04-24	Battery on a Person Over 65	Risk of Recidivism	10	High	2013-02-21	Risk of Violence	9	High	2013-02-21	2013-04-17	2013-04-18	8	0
123	eddie sessions	eddie	sessions	2014-10-17	Male	1950-01-22	66	Greater than 45	African-American	0	9	0	0	0	-1	2014-10-16 06:36:44	2014-10-17 08:50:33	10016453MO10A		2011-01-14	1372	(MO3)	arrest case no charge	0									0					Risk of Recidivism	9	High	2014-10-17	Risk of Violence	3	Low	2014-10-17	2014-10-16	2014-10-17	0	0
124	coby joseph	coby	joseph	2014-07-17	Male	1963-08-15	52	Greater than 45	African-American	0	5	0	0	3	-318	2013-09-02 04:25:11	2013-09-11 05:54:19	14009721CF10A	2014-07-16		1	(F3)	Driving While License Revoked	0									0					Risk of Recidivism	5	Medium	2014-07-17	Risk of Violence	1	Low	2014-07-17	2013-09-02	2013-09-11	3	0
126	kevin kallis	kevin	kallis	2014-06-24	Male	1993-12-19	22	Less than 25	Caucasian	0	6	0	0	3	-5	2014-06-19 12:38:23	2014-06-19 08:56:13	14008423CF10A	2014-06-17		7	(F3)	Burglary Conveyance Unoccup	0									0					Risk of Recidivism	6	Medium	2014-06-24	Risk of Violence	5	Medium	2014-06-24	2014-06-19	2014-06-19	3	0
127	desmond lee	desmond	lee	2014-08-07	Male	1965-10-08	50	Greater than 45	Other	0	1	0	0	0	-1	2014-08-06 12:43:24	2014-08-07 08:29:46	14010718CF10A		2014-08-06	1	(F3)	arrest case no charge	1	15012266TC20A	(M2)	135	2015-02-05	Susp Drivers Lic 1st Offense	2015-06-20	2015-06-22		0					Risk of Recidivism	1	Low	2014-08-07	Risk of Violence	2	Low	2014-08-07	2015-06-20	2015-06-22	0	0
128	kambrel tarver	kambrel	tarver	2013-04-20	Male	1991-01-30	25	25 - 45	African-American	1	10	6	1	14	-1	2013-04-19 02:20:32	2013-04-26 05:45:46	11008067CF10A		2013-04-19	1	(F2)	arrest case no charge	1	13015805MM10A	(M1)	0	2013-07-29	Resist/Obstruct W/O Violence	2013-07-29	2013-08-17		1	16003005CF10A	(M1)	2016-03-09	Battery	Risk of Recidivism	10	High	2013-04-20	Risk of Violence	10	High	2013-04-20	2013-07-29	2013-08-17	14	6
130	juster philippe	juster	philippe	2013-10-03	Male	1995-05-06	20	Less than 25	Other	0	5	0	0	0	-1	2013-10-02 05:50:22	2013-10-03 08:15:24	13013834CF10A	2013-10-02		1	(F3)	Tampering With Physical Evidence	1	14001348CF10A	(F2)	0	2014-01-30	Robbery / No Weapon	2014-01-30	2015-03-29		1	14001348CF10A	(F2)	2014-01-30	Agg Battery Grt/Bod/Harm	Risk of Recidivism	5	Medium	2013-10-03	Risk of Violence	8	High	2013-10-03	2014-01-30	2015-03-29	0	0
131	khalil pass	khalil	pass	2014-01-16	Male	1994-01-26	22	Less than 25	African-American	1	9	0	0	2	0	2014-01-16 02:39:46	2014-02-15 04:39:31	14000722CF10A	2014-01-16		0	(F3)	Attempted Burg/struct/unocc	1	14010658MM10A	(M1)	1	2014-07-10	Resist/Obstruct W/O Violence	2014-07-11	2014-07-11		0					Risk of Recidivism	9	High	2014-01-16	Risk of Violence	10	High	2014-01-16	2014-01-16	2014-02-15	2	30
132	israel doyle	israel	doyle	2014-03-17	Male	1992-12-07	23	Less than 25	African-American	0	7	0	1	2	137	2014-08-01 08:35:46	2014-08-02 01:49:31	13019996MM10A		2013-09-06	192	(M2)	arrest case no charge	1	14075171TC40A	(M2)		2014-09-15	Leave Acc/Attend Veh/More $50				0					Risk of Recidivism	7	Medium	2014-03-17	Risk of Violence	8	High	2014-03-17	2014-08-01	2014-08-02	2	0
132	israel doyle	israel	doyle	2014-03-17	Male	1992-12-07	23	Less than 25	African-American	0	7	0	1	2	137	2014-08-01 08:35:46	2014-08-02 01:49:31	13019996MM10A		2013-09-06	192	(M2)	arrest case no charge	1	14075171TC40A	(M2)		2014-09-15	Leave Acc/Attend Veh/More $50				0					Risk of Recidivism	7	Medium	2014-03-17	Risk of Violence	8	High	2014-03-17	2014-08-01	2014-08-02	2	138
133	lawrence mitchell	lawrence	mitchell	2014-08-07	Male	1962-01-14	54	Greater than 45	African-American	0	6	0	0	6	-1	2014-08-06 10:41:47	2014-11-20 03:53:23	12003155CF10A		2012-03-26	864	(F1)	arrest case no charge	0									0					Risk of Recidivism	6	Medium	2014-08-07	Risk of Violence	5	Medium	2014-08-07	2014-11-25	2014-12-05	6	105
133	lawrence mitchell	lawrence	mitchell	2014-08-07	Male	1962-01-14	54	Greater than 45	African-American	0	6	0	0	6	-1	2014-08-06 10:41:47	2014-11-20 03:53:23	12003155CF10A		2012-03-26	864	(F1)	arrest case no charge	0									0					Risk of Recidivism	6	Medium	2014-08-07	Risk of Violence	5	Medium	2014-08-07	2014-11-25	2014-12-05	6	120
134	david chviech	david	chviech	2014-03-26	Male	1975-10-26	40	25 - 45	Caucasian	0	5	0	0	4	-1	2014-03-25 08:59:43	2014-03-26 01:46:11	14004135CF10A		2014-03-25	1	(F3)	arrest case no charge	0									0					Risk of Recidivism	5	Medium	2014-03-26	Risk of Violence	4	Low	2014-03-26	2015-01-08	2015-01-21	4	0
134	david chviech	david	chviech	2014-03-26	Male	1975-10-26	40	25 - 45	Caucasian	0	5	0	0	4	-1	2014-03-25 08:59:43	2014-03-26 01:46:11	14004135CF10A		2014-03-25	1	(F3)	arrest case no charge	0									0					Risk of Recidivism	5	Medium	2014-03-26	Risk of Violence	4	Low	2014-03-26	2015-01-08	2015-01-21	4	301
135	jurvon haygood	jurvon	haygood	2014-08-29	Male	1990-12-02	25	25 - 45	African-American	0	7	0	0	10	-181	2014-03-01 09:30:48	2014-08-29 11:56:49	14004639CF10A		2014-04-13	138	(F2)	arrest case no charge	0									0					Risk of Recidivism	7	Medium	2014-08-29	Risk of Violence	6	Medium	2014-08-29	2015-03-07	2015-04-14	10	0
135	jurvon haygood	jurvon	haygood	2014-08-29	Male	1990-12-02	25	25 - 45	African-American	0	7	0	0	10	-181	2014-03-01 09:30:48	2014-08-29 11:56:49	14004639CF10A		2014-04-13	138	(F2)	arrest case no charge	0									0					Risk of Recidivism	7	Medium	2014-08-29	Risk of Violence	6	Medium	2014-08-29	2015-04-14	2020-01-01	10	581
136	terri hamilton	terri	hamilton	2013-03-30	Female	1980-09-16	35	25 - 45	African-American	0	2	0	0	1	-1	2013-03-29 06:55:39	2013-03-30 03:12:37	13000467TC10A		2013-03-29	1	(M2)	arrest case no charge	0									0					Risk of Recidivism	2	Low	2013-03-30	Risk of Violence	1	Low	2013-03-30	2013-03-29	2013-03-30	1	0
137	clarence bonner	clarence	bonner	2014-04-29	Male	1979-11-12	36	25 - 45	African-American	0	7	0	0	9	0	2014-04-29 12:24:22	2014-05-03 04:26:44	14005910CF10A	2014-04-28		1	(F2)	Deliver Cocaine	1	14008440MM10A	(M1)	1	2014-05-26	Possess Cannabis/20 Grams Or Less	2014-05-27	2014-05-27		0					Risk of Recidivism	7	Medium	2014-04-29	Risk of Violence	6	Medium	2014-04-29	2014-04-29	2014-05-03	9	4
138	edwin carpenter	edwin	carpenter	2013-01-12	Male	1989-05-29	26	25 - 45	Caucasian	0	8	0	0	7	0	2013-01-12 04:53:07	2013-01-12 07:28:51	13000564CF10A	2013-01-11		1	(F3)	Possession Burglary Tools	1	14001406MM10A	(M1)	1	2014-01-24	Resist/Obstruct W/O Violence	2014-01-25	2014-01-26		0					Risk of Recidivism	8	High	2013-01-12	Risk of Violence	4	Low	2013-01-12	2014-03-27	2014-04-06	7	0
139	kemar rose	kemar	rose	2013-04-20	Male	1994-09-06	21	Less than 25	Other	0	6	0	0	1	0	2013-04-20 12:30:29	2013-04-24 10:36:19	13005641CF10A	2013-04-19		1	(F3)	Grand Theft in the 3rd Degree	1	13017924CF10A	(M1)	0	2013-12-29	Possess Drug Paraphernalia	2013-12-29	2014-04-06		0					Risk of Recidivism	6	Medium	2013-04-20	Risk of Violence	6	Medium	2013-04-20	2013-12-29	2014-04-06	1	4
141	joshua tharp	joshua	tharp	2014-12-16	Male	1985-07-16	30	25 - 45	Caucasian	0	5	0	1	6	-239	2014-04-21 03:20:18	2014-05-01 09:34:11	14016619CF10A	2014-12-15		1	(F3)	Burglary Conveyance Unoccup	0									0					Risk of Recidivism	5	Medium	2014-12-16	Risk of Violence	4	Low	2014-12-16	2014-04-21	2014-05-01	6	0
142	richard veach	richard	veach	2014-12-13	Male	1991-01-20	25	25 - 45	Caucasian	0	8	0	0	9	-1	2014-12-12 07:27:40	2014-12-13 07:23:49	14016502CF10A	2014-12-12		1	(F3)	Pos Cannabis W/Intent Sel/Del	1	15028085TC20A	(M2)		2015-05-07	Driving License Suspended				1	15006549MM10A	(M1)	2015-06-17	Battery	Risk of Recidivism	8	High	2014-12-13	Risk of Violence	9	High	2014-12-13	2015-07-17	2015-07-19	9	0
143	jimmie moss	jimmie	moss	2013-01-04	Male	1944-05-13	71	Greater than 45	African-American	0	7	0	0	12				10023009MM10A	2010-10-23		804	(M1)	Possess Cannabis/20 Grams Or Less	0									0					Risk of Recidivism	7	Medium	2013-01-04	Risk of Violence	3	Low	2013-01-04			12	0
144	stephen perry	stephen	perry	2014-12-04	Male	1981-08-03	34	25 - 45	African-American	0	3	0	0	3	-21	2014-11-13 08:19:29	2014-11-29 12:50:27	14016258MM10A	2014-11-13		21	(M1)	Battery	0									0					Risk of Recidivism	3	Low	2014-12-04	Risk of Violence	2	Low	2014-12-04	2014-11-13	2014-11-29	3	0
145	jasmin negron	jasmin	negron	2013-11-14	Female	1995-09-19	20	Less than 25	Caucasian	0	7	0	0	0	-1	2013-11-13 11:21:14	2013-11-14 01:36:21	13015797CF10A	2013-11-13		1	(F3)	Poss3,4 Methylenedioxymethcath	0									0					Risk of Recidivism	7	Medium	2013-11-14	Risk of Violence	8	High	2013-11-14	2013-11-13	2013-11-14	0	0
146	michael kohler	michael	kohler	2013-02-13	Male	1976-08-10	39	25 - 45	Caucasian	0	1	0	0	2	-2	2013-02-11 12:50:21	2013-02-11 07:33:17	13002060CF10A	2013-02-10		3	(F3)	Possession Of Alprazolam	1	13005488CF10A	(F3)	0	2013-04-17	Possession of Hydromorphone	2013-04-17	2013-05-09		0					Risk of Recidivism	1	Low	2013-02-13	Risk of Violence	1	Low	2013-02-13	2013-04-17	2013-05-09	2	0
147	phillip bishop	phillip	bishop	2013-11-06	Male	1949-05-04	66	Greater than 45	Caucasian	0	1	0	0	3	-64	2013-09-03 04:44:29	2013-10-03 12:15:17	13012424CF10A	2013-09-03		64	(F2)	Flee/Elude LEO-Agg Flee Unsafe	0									0					Risk of Recidivism	1	Low	2013-11-06	Risk of Violence	1	Low	2013-11-06	2013-09-03	2013-10-03	3	0
148	deanna murphy	deanna	murphy	2013-04-15	Female	1961-11-10	54	Greater than 45	Caucasian	0	1	0	0	0	0	2013-04-15 01:07:24	2013-04-15 07:56:24	13007296MM10A	2013-04-14		1	(M1)	DUI Level 0.15 Or Minor In Veh	0									0					Risk of Recidivism	1	Low	2013-04-15	Risk of Violence	1	Low	2013-04-15	2013-04-15	2013-04-15	0	0
150	sharon muriente	sharon	muriente	2013-08-20	Female	1971-05-12	44	25 - 45	Hispanic	0	1	0	0	0	-2	2013-08-18 03:23:05	2013-08-19 06:27:00	13015636MM10A	2013-08-18		2	(M1)	Battery	0									0					Risk of Recidivism	1	Low	2013-08-20	Risk of Violence	1	Low	2013-08-20	2013-08-18	2013-08-19	0	0
151	willie morris	willie	morris	2014-11-14	Male	1996-08-15	19	Less than 25	African-American	0	4	0	0	1	-10	2014-11-04 07:39:38	2014-11-13 10:02:51	14015929MM10A	2014-11-04		10	(M2)	Battery	1	15002656CF10A	(M1)	0	2015-02-26	Viol Injunction Protect Dom Violence	2015-02-26	2015-03-04		1	15002656CF10A	(F3)	2015-02-26	Battery on Law Enforc Officer	Risk of Recidivism	4	Low	2014-11-14	Risk of Violence	7	Medium	2014-11-14	2015-02-26	2015-03-04	1	0
152	brandon minter	brandon	minter	2014-02-28	Male	1991-11-27	24	Less than 25	African-American	0	2	0	0	1	-137	2013-10-14 04:11:17	2014-02-28 11:20:14	13007744CF10A		2013-10-14	137	(F2)	arrest case no charge	0									0					Risk of Recidivism	2	Low	2014-02-28	Risk of Violence	3	Low	2014-02-28	2015-07-16	2015-07-16	1	0
152	brandon minter	brandon	minter	2014-02-28	Male	1991-11-27	24	Less than 25	African-American	0	2	0	0	1	-137	2013-10-14 04:11:17	2014-02-28 11:20:14	13007744CF10A		2013-10-14	137	(F2)	arrest case no charge	0									0					Risk of Recidivism	2	Low	2014-02-28	Risk of Violence	3	Low	2014-02-28	2015-07-16	2015-07-16	1	503
153	matthew grant	matthew	grant	2013-09-09	Male	1985-07-24	30	25 - 45	African-American	0	2	0	0	1	-1	2013-09-08 09:39:18	2013-09-09 08:03:09	13012705CF10A	2013-09-08		1	(F3)	Fail To Redeliv Hire/Leas Prop	0									0					Risk of Recidivism	2	Low	2013-09-09	Risk of Violence	2	Low	2013-09-09	2013-09-08	2013-09-09	1	0
154	sandra quinones	sandra	quinones	2013-09-05	Female	1977-04-14	39	25 - 45	Caucasian	0	1	0	0	0	-1	2013-09-04 11:36:38	2013-09-06 04:07:01	13012513CF10A	2013-09-04		1	(F3)	Aggravated Assault W/Dead Weap	1	13020368MM10A	(M1)	1	2013-10-27	Battery	2013-10-28	2013-10-28		1	13020368MM10A	(M1)	2013-10-27	Battery	Risk of Recidivism	1	Low	2013-09-05	Risk of Violence	1	Low	2013-09-05	2013-09-04	2013-09-06	0	1
155	shetera chaney	shetera	chaney	2014-11-25	Female	1983-11-03	32	25 - 45	African-American	0	3	0	0	8	0	2014-11-25 05:33:33	2014-11-26 02:49:43	14016770MM10A	2014-11-24		1	(M1)	Battery	0									0					Risk of Recidivism	3	Low	2014-11-25	Risk of Violence	1	Low	2014-11-25	2014-11-25	2014-11-26	8	1
156	vincent carbone	vincent	carbone	2013-04-11	Male	1991-10-02	24	Less than 25	Caucasian	0	6	1	2	8	-1	2013-04-10 05:59:23	2013-04-22 10:32:05	13005383CF10A	2013-04-11		0	(F3)	False Ownership Info/Pawn Item	1	13006642CF10A	(F2)	1	2013-05-08	Poss Wep Conv Felon	2013-05-09	2013-05-09		0					Risk of Recidivism	6	Medium	2013-04-11	Risk of Violence	6	Medium	2013-04-11	2013-04-10	2013-04-22	8	11
157	silvio paulino	silvio	paulino	2013-08-29	Male	1985-10-24	30	25 - 45	Caucasian	0	4	0	0	0	-1	2013-08-28 11:22:24	2013-09-03 10:40:45	13012146CF10A	2013-08-28		1	(F3)	Possession Of Methamphetamine	0									0					Risk of Recidivism	4	Low	2013-08-29	Risk of Violence	2	Low	2013-08-29	2015-01-08	2015-02-04	0	5
157	silvio paulino	silvio	paulino	2013-08-29	Male	1985-10-24	30	25 - 45	Caucasian	0	4	0	0	0	-1	2013-08-28 11:22:24	2013-09-03 10:40:45	13012146CF10A	2013-08-28		1	(F3)	Possession Of Methamphetamine	0									0					Risk of Recidivism	4	Low	2013-08-29	Risk of Violence	2	Low	2013-08-29	2015-04-03	2015-04-23	0	524
157	silvio paulino	silvio	paulino	2013-08-29	Male	1985-10-24	30	25 - 45	Caucasian	0	4	0	0	0	-1	2013-08-28 11:22:24	2013-09-03 10:40:45	13012146CF10A	2013-08-28		1	(F3)	Possession Of Methamphetamine	0									0					Risk of Recidivism	4	Low	2013-08-29	Risk of Violence	2	Low	2013-08-29	2015-04-03	2015-04-23	0	602
158	john white	john	white	2014-02-21	Male	1984-06-08	31	25 - 45	Caucasian	0	5	0	0	0	-1	2014-02-20 09:46:47	2014-03-31 09:04:43	14003013MM10A	2014-02-20		1	(M1)	Battery	0									0					Risk of Recidivism	5	Medium	2014-02-21	Risk of Violence	2	Low	2014-02-21	2014-02-20	2014-03-31	0	38
159	april mincey	april	mincey	2013-02-26	Female	1976-09-19	39	25 - 45	Caucasian	0	4	0	0	1	-1	2013-02-25 07:42:47	2013-06-12 04:31:04	13002849CF10A	2013-02-25		1	(F3)	Possession of Morphine	0									0					Risk of Recidivism	4	Low	2013-02-26	Risk of Violence	3	Low	2013-02-26	2014-03-25	2014-03-30	1	106
159	april mincey	april	mincey	2013-02-26	Female	1976-09-19	39	25 - 45	Caucasian	0	4	0	0	1	-1	2013-02-25 07:42:47	2013-06-12 04:31:04	13002849CF10A	2013-02-25		1	(F3)	Possession of Morphine	0									0					Risk of Recidivism	4	Low	2013-02-26	Risk of Violence	3	Low	2013-02-26	2014-08-27	2014-12-29	1	397
159	april mincey	april	mincey	2013-02-26	Female	1976-09-19	39	25 - 45	Caucasian	0	4	0	0	1	-1	2013-02-25 07:42:47	2013-06-12 04:31:04	13002849CF10A	2013-02-25		1	(F3)	Possession of Morphine	0									0					Risk of Recidivism	4	Low	2013-02-26	Risk of Violence	3	Low	2013-02-26	2015-12-08	2015-12-11	1	671
159	april mincey	april	mincey	2013-02-26	Female	1976-09-19	39	25 - 45	Caucasian	0	4	0	0	1	-1	2013-02-25 07:42:47	2013-06-12 04:31:04	13002849CF10A	2013-02-25		1	(F3)	Possession of Morphine	0									0					Risk of Recidivism	4	Low	2013-02-26	Risk of Violence	3	Low	2013-02-26	2016-01-29	2020-01-01	1	1018
159	april mincey	april	mincey	2013-02-26	Female	1976-09-19	39	25 - 45	Caucasian	0	4	0	0	1	-1	2013-02-25 07:42:47	2013-06-12 04:31:04	13002849CF10A	2013-02-25		1	(F3)	Possession of Morphine	0									0					Risk of Recidivism	4	Low	2013-02-26	Risk of Violence	3	Low	2013-02-26	2016-01-29	2020-01-01	1	1130
160	jimmy bell	jimmy	bell	2014-12-04	Male	1957-04-02	59	Greater than 45	African-American	0	9	0	0	14	178	2015-05-31 07:39:18	2015-09-18 01:21:56	12008029CF10A		2014-03-14	265	(F3)	arrest case no charge	1	15007122CF10A	(F3)	0	2015-05-31	Aggravated Assault W/Dead Weap	2015-05-31	2015-09-18		1	15007122CF10A	(F3)	2015-05-31	Aggravated Assault W/Dead Weap	Risk of Recidivism	9	High	2014-12-04	Risk of Violence	4	Low	2014-12-04	2015-05-31	2015-09-18	14	0
161	michael wilfehrt	michael	wilfehrt	2014-05-08	Male	1981-01-26	35	25 - 45	Caucasian	0	6	0	0	7	0	2014-05-08 04:22:14	2014-05-08 12:57:16	14006451CF10A	2014-05-08		0	(F3)	Felony Driving While Lic Suspd	0									0					Risk of Recidivism	6	Medium	2014-05-08	Risk of Violence	3	Low	2014-05-08	2014-07-28	2014-08-09	7	0
161	michael wilfehrt	michael	wilfehrt	2014-05-08	Male	1981-01-26	35	25 - 45	Caucasian	0	6	0	0	7	0	2014-05-08 04:22:14	2014-05-08 12:57:16	14006451CF10A	2014-05-08		0	(F3)	Felony Driving While Lic Suspd	0									0					Risk of Recidivism	6	Medium	2014-05-08	Risk of Violence	3	Low	2014-05-08	2014-07-28	2014-08-09	7	93
162	tashay tate	tashay	tate	2014-06-05	Female	1991-05-04	24	Less than 25	Other	0	3	0	0	0	-1	2014-06-04 01:23:52	2014-06-21 01:13:30	14007710CF10A	2014-06-04		1	(F2)	Aggrav Battery w/Deadly Weapon	0									0					Risk of Recidivism	3	Low	2014-06-05	Risk of Violence	4	Low	2014-06-05	2014-06-04	2014-06-21	0	16
163	andrew chu	andrew	chu	2013-08-15	Male	1973-01-15	43	25 - 45	Caucasian	0	1	0	0	1	-30	2013-07-16 06:41:37	2013-07-17 07:35:00	13009961CF10A	2013-07-16		30	(F3)	Possession of Cocaine	0									0					Risk of Recidivism	1	Low	2013-08-15	Risk of Violence	1	Low	2013-08-15	2013-07-16	2013-07-17	1	0
164	kirby jeannot	kirby	jeannot	2014-10-16	Male	1994-05-03	21	Less than 25	African-American	1	9	0	1	2	-1	2014-10-15 12:23:24	2014-10-17 03:41:40	14013899CF10A	2014-10-15		1	(F3)	Tampering With Physical Evidence	0									0					Risk of Recidivism	9	High	2014-10-16	Risk of Violence	6	Medium	2014-10-16	2015-03-10	2015-03-11	2	1
164	kirby jeannot	kirby	jeannot	2014-10-16	Male	1994-05-03	21	Less than 25	African-American	1	9	0	1	2	-1	2014-10-15 12:23:24	2014-10-17 03:41:40	14013899CF10A	2014-10-15		1	(F3)	Tampering With Physical Evidence	0									0					Risk of Recidivism	9	High	2014-10-16	Risk of Violence	6	Medium	2014-10-16	2015-05-14	2015-06-24	2	146
164	kirby jeannot	kirby	jeannot	2014-10-16	Male	1994-05-03	21	Less than 25	African-American	1	9	0	1	2	-1	2014-10-15 12:23:24	2014-10-17 03:41:40	14013899CF10A	2014-10-15		1	(F3)	Tampering With Physical Evidence	0									0					Risk of Recidivism	9	High	2014-10-16	Risk of Violence	6	Medium	2014-10-16	2015-09-12	2015-09-16	2	251
164	kirby jeannot	kirby	jeannot	2014-10-16	Male	1994-05-03	21	Less than 25	African-American	1	9	0	1	2	-1	2014-10-15 12:23:24	2014-10-17 03:41:40	14013899CF10A	2014-10-15		1	(F3)	Tampering With Physical Evidence	0									0					Risk of Recidivism	9	High	2014-10-16	Risk of Violence	6	Medium	2014-10-16	2015-12-01	2015-12-02	2	335
164	kirby jeannot	kirby	jeannot	2014-10-16	Male	1994-05-03	21	Less than 25	African-American	1	9	0	1	2	-1	2014-10-15 12:23:24	2014-10-17 03:41:40	14013899CF10A	2014-10-15		1	(F3)	Tampering With Physical Evidence	0									0					Risk of Recidivism	9	High	2014-10-16	Risk of Violence	6	Medium	2014-10-16	2015-12-04	2015-12-17	2	412
164	kirby jeannot	kirby	jeannot	2014-10-16	Male	1994-05-03	21	Less than 25	African-American	1	9	0	1	2	-1	2014-10-15 12:23:24	2014-10-17 03:41:40	14013899CF10A	2014-10-15		1	(F3)	Tampering With Physical Evidence	0									0					Risk of Recidivism	9	High	2014-10-16	Risk of Violence	6	Medium	2014-10-16	2015-12-04	2015-12-17	2	427
165	avianna vassell	avianna	vassell	2014-09-20	Female	1994-11-14	21	Less than 25	African-American	0	4	0	0	0	-1	2014-09-19 06:13:00	2014-09-23 05:47:00	14013953MM10A	2014-09-19		1	(M1)	Battery	0									0					Risk of Recidivism	4	Low	2014-09-20	Risk of Violence	4	Low	2014-09-20	2014-09-19	2014-09-23	0	3
166	brandon wilson	brandon	wilson	2013-03-02	Male	1994-06-15	21	Less than 25	African-American	0	9	0	0	3	-1	2013-03-01 01:43:35	2013-03-07 08:20:12	13003093CF10A	2013-03-01		1	(F3)	Grand Theft in the 3rd Degree	1	13004351CF10A	(M1)	0	2013-03-26	Resist/Obstruct W/O Violence	2013-03-26	2014-01-22		0					Risk of Recidivism	9	High	2013-03-02	Risk of Violence	6	Medium	2013-03-02	2013-03-26	2014-01-22	3	5
167	charlton ambrose	charlton	ambrose	2014-06-06	Male	1988-09-30	27	25 - 45	African-American	0	7	0	0	0	-1	2014-06-05 09:28:31	2014-06-06 02:38:15	14007811CF10A	2014-06-05		1	(F3)	Driving While License Revoked	0									0					Risk of Recidivism	7	Medium	2014-06-06	Risk of Violence	3	Low	2014-06-06	2014-06-05	2014-06-06	0	0
168	jaquez bush	jaquez	bush	2014-10-08	Male	1996-02-22	20	Less than 25	African-American	0	8	0	0	0	0	2014-10-08 03:57:59	2014-10-08 08:30:20	14013600CF10A		2014-10-08	0	(F3)	arrest case no charge	0									0					Risk of Recidivism	8	High	2014-10-08	Risk of Violence	6	Medium	2014-10-08	2014-12-05	2015-01-09	0	0
168	jaquez bush	jaquez	bush	2014-10-08	Male	1996-02-22	20	Less than 25	African-American	0	8	0	0	0	0	2014-10-08 03:57:59	2014-10-08 08:30:20	14013600CF10A		2014-10-08	0	(F3)	arrest case no charge	0									0					Risk of Recidivism	8	High	2014-10-08	Risk of Violence	6	Medium	2014-10-08	2015-07-31	2015-07-31	0	93
168	jaquez bush	jaquez	bush	2014-10-08	Male	1996-02-22	20	Less than 25	African-American	0	8	0	0	0	0	2014-10-08 03:57:59	2014-10-08 08:30:20	14013600CF10A		2014-10-08	0	(F3)	arrest case no charge	0									0					Risk of Recidivism	8	High	2014-10-08	Risk of Violence	6	Medium	2014-10-08	2015-08-28	2015-09-01	0	296
168	jaquez bush	jaquez	bush	2014-10-08	Male	1996-02-22	20	Less than 25	African-American	0	8	0	0	0	0	2014-10-08 03:57:59	2014-10-08 08:30:20	14013600CF10A		2014-10-08	0	(F3)	arrest case no charge	0									0					Risk of Recidivism	8	High	2014-10-08	Risk of Violence	6	Medium	2014-10-08	2015-09-08	2015-09-09	0	328
168	jaquez bush	jaquez	bush	2014-10-08	Male	1996-02-22	20	Less than 25	African-American	0	8	0	0	0	0	2014-10-08 03:57:59	2014-10-08 08:30:20	14013600CF10A		2014-10-08	0	(F3)	arrest case no charge	0									0					Risk of Recidivism	8	High	2014-10-08	Risk of Violence	6	Medium	2014-10-08	2015-09-29	2015-09-29	0	336
168	jaquez bush	jaquez	bush	2014-10-08	Male	1996-02-22	20	Less than 25	African-American	0	8	0	0	0	0	2014-10-08 03:57:59	2014-10-08 08:30:20	14013600CF10A		2014-10-08	0	(F3)	arrest case no charge	0									0					Risk of Recidivism	8	High	2014-10-08	Risk of Violence	6	Medium	2014-10-08	2015-09-29	2015-09-29	0	356
169	edson howlett	edson	howlett	2013-01-16	Male	1977-11-14	38	25 - 45	Caucasian	0	4	0	0	5	-1	2013-01-15 08:16:11	2013-01-18 04:32:15	13001000MM10A	2013-01-15		1	(M1)	Possess Cannabis/20 Grams Or Less	1	13003609CF10A	(F3)	0	2013-03-12	Possession of Cannabis	2013-03-12	2013-03-13		0					Risk of Recidivism	4	Low	2013-01-16	Risk of Violence	3	Low	2013-01-16	2013-03-12	2013-03-13	5	2
170	danny jones	danny	jones	2013-02-25	Male	1988-08-09	27	25 - 45	African-American	0	9	0	0	3	-1	2013-02-24 06:02:23	2013-09-19 08:59:55	13002831CF10A	2013-02-23		2	(F3)	Robbery / No Weapon	0									0					Risk of Recidivism	9	High	2013-02-25	Risk of Violence	4	Low	2013-02-25	2013-10-21	2013-10-24	3	206
170	danny jones	danny	jones	2013-02-25	Male	1988-08-09	27	25 - 45	African-American	0	9	0	0	3	-1	2013-02-24 06:02:23	2013-09-19 08:59:55	13002831CF10A	2013-02-23		2	(F3)	Robbery / No Weapon	0									0					Risk of Recidivism	9	High	2013-02-25	Risk of Violence	4	Low	2013-02-25	2013-10-24	2020-01-01	3	1131
171	joseph montalvomolina	joseph	montalvomolina	2013-02-15	Male	1982-02-19	34	25 - 45	Caucasian	0	5	0	0	0	0	2013-02-15 10:54:22	2013-03-02 09:04:47	13002550CF10A	2013-02-15		0	(F3)	Aggravated Assault w/Firearm	0									0					Risk of Recidivism	5	Medium	2013-02-15	Risk of Violence	5	Medium	2013-02-15	2014-05-02	2014-07-10	0	15
171	joseph montalvomolina	joseph	montalvomolina	2013-02-15	Male	1982-02-19	34	25 - 45	Caucasian	0	5	0	0	0	0	2013-02-15 10:54:22	2013-03-02 09:04:47	13002550CF10A	2013-02-15		0	(F3)	Aggravated Assault w/Firearm	0									0					Risk of Recidivism	5	Medium	2013-02-15	Risk of Violence	5	Medium	2013-02-15	2014-05-02	2014-07-10	0	510
172	brent shy	brent	shy	2014-12-29	Male	1985-05-07	30	25 - 45	African-American	0	3	0	0	3	0	2014-12-29 07:22:39	2014-12-29 07:21:35	14017152CF10A	2014-12-29		0	(F3)	Possession of Cocaine	0									0					Risk of Recidivism	3	Low	2014-12-29	Risk of Violence	3	Low	2014-12-29	2014-12-29	2014-12-29	3	0
173	harold dor	harold	dor	2013-11-17	Male	1982-06-03	33	25 - 45	African-American	0	5	0	0	5	0	2013-11-17 01:23:30	2013-11-17 08:15:06	13015967CF10A	2013-11-16		1	(F3)	Poss Contr Subst W/o Prescript	1	14001731MM30A	(M1)		2014-10-28	Possess Cannabis/20 Grams Or Less				0					Risk of Recidivism	5	Medium	2013-11-17	Risk of Violence	2	Low	2013-11-17	2013-11-17	2013-11-17	5	0
174	gonzales joseph	gonzales	joseph	2013-11-18	Male	1978-09-27	37	25 - 45	African-American	0	2	0	0	3	0	2013-11-18 03:46:24	2013-11-19 10:18:36	13016018CF10A	2013-11-18		0	(F3)	Poss3,4 Methylenedioxymethcath	0									0					Risk of Recidivism	2	Low	2013-11-18	Risk of Violence	1	Low	2013-11-18	2014-02-28	2014-03-07	3	1
174	gonzales joseph	gonzales	joseph	2013-11-18	Male	1978-09-27	37	25 - 45	African-American	0	2	0	0	3	0	2013-11-18 03:46:24	2013-11-19 10:18:36	13016018CF10A	2013-11-18		0	(F3)	Poss3,4 Methylenedioxymethcath	0									0					Risk of Recidivism	2	Low	2013-11-18	Risk of Violence	1	Low	2013-11-18	2014-02-28	2014-03-07	3	109
175	anthony sanmarco	anthony	sanmarco	2013-03-16	Male	1974-03-25	42	25 - 45	Caucasian	0	2	0	0	1	0	2013-03-16 03:53:03	2013-03-17 01:43:20	13003844CF10A	2013-03-15		1	(F3)	Aggrav Stalking After Injunctn	1	13003916CF10A	(F3)	1	2013-03-17	Aggrav Stalking After Injunctn	2013-03-18	2013-04-23		0					Risk of Recidivism	2	Low	2013-03-16	Risk of Violence	2	Low	2013-03-16	2013-03-16	2013-03-17	1	1
176	coy daniels	coy	daniels	2013-09-06	Male	1974-12-03	41	25 - 45	African-American	0	9	1	0	10	0	2013-09-06 04:25:05	2014-03-01 04:39:46	13012611CF10A	2013-09-06		0	(F3)	Possession of Cocaine	1	14009556MM10A	(M1)	0	2014-06-18	Resist/Obstruct W/O Violence	2014-06-18	2014-07-29		0					Risk of Recidivism	9	High	2013-09-06	Risk of Violence	7	Medium	2013-09-06	2014-06-18	2014-07-29	10	176
177	zuberi floyd	zuberi	floyd	2013-11-13	Male	1993-06-27	22	Less than 25	African-American	0	4	0	0	0	-1	2013-11-12 03:57:04	2013-11-13 01:01:29	13015737CF10A	2013-11-12		1	(F3)	Uttering a Forged Instrument	1	15003539CF10A	(F3)	362	2014-12-12	Uttering a Forged Instrument	2015-12-09	2015-12-09		0					Risk of Recidivism	4	Low	2013-11-13	Risk of Violence	7	Medium	2013-11-13	2015-12-09	2015-12-09	0	0
178	ramon wilkerson	ramon	wilkerson	2014-01-11	Male	1982-05-17	33	25 - 45	African-American	0	8	12	2	28	-1	2014-01-10 08:06:40	2014-01-12 04:07:52	14000463CF10A	2014-01-10		1	(F3)	Driving While License Revoked	1	14013147TC10A	(M2)	0	2014-04-04	Operating W/O Valid License	2014-04-04	2014-04-05		0					Risk of Recidivism	8	High	2014-01-11	Risk of Violence	5	Medium	2014-01-11	2014-04-04	2014-04-05	28	1
179	marc perry	marc	perry	2014-11-03	Male	1971-10-22	44	25 - 45	Caucasian	0	1	0	0	0	-3	2014-10-31 03:02:35	2014-11-01 08:35:16	14015794MM10A	2014-10-31		3	(M2)	Criminal Mischief Damage <$200	0									0					Risk of Recidivism	1	Low	2014-11-03	Risk of Violence	1	Low	2014-11-03	2014-10-31	2014-11-01	0	0
180	lee wright	lee	wright	2013-10-14	Male	1984-08-19	31	25 - 45	African-American	0	7	0	0	1	-1	2013-10-13 03:47:49	2013-10-14 08:18:17	13019413MM10A	2013-10-13		1	(M1)	Battery	0									0					Risk of Recidivism	7	Medium	2013-10-14	Risk of Violence	8	High	2013-10-14	2013-10-13	2013-10-14	1	0
181	kerby roselva	kerby	roselva	2014-02-20	Male	1989-09-10	26	25 - 45	African-American	0	8	0	0	9	0	2014-02-20 10:48:30	2014-02-21 10:16:49	14002439CF10A	2014-02-20		0	(F3)	Felony Driving While Lic Suspd	0									0					Risk of Recidivism	8	High	2014-02-20	Risk of Violence	7	Medium	2014-02-20	2014-08-05	2020-01-01	9	1
181	kerby roselva	kerby	roselva	2014-02-20	Male	1989-09-10	26	25 - 45	African-American	0	8	0	0	9	0	2014-02-20 10:48:30	2014-02-21 10:16:49	14002439CF10A	2014-02-20		0	(F3)	Felony Driving While Lic Suspd	0									0					Risk of Recidivism	8	High	2014-02-20	Risk of Violence	7	Medium	2014-02-20	2014-08-05	2020-01-01	9	771
182	margretta martin	margretta	martin	2013-10-29	Female	1985-08-27	30	25 - 45	Other	0	2	0	0	1	-1	2013-10-28 07:07:32	2013-10-29 09:49:38	13015030CF10A	2013-10-28		1	(F3)	Crim Use of Personal ID Info	0									0					Risk of Recidivism	2	Low	2013-10-29	Risk of Violence	2	Low	2013-10-29	2014-02-03	2014-02-11	1	0
182	margretta martin	margretta	martin	2013-10-29	Female	1985-08-27	30	25 - 45	Other	0	2	0	0	1	-1	2013-10-28 07:07:32	2013-10-29 09:49:38	13015030CF10A	2013-10-28		1	(F3)	Crim Use of Personal ID Info	0									0					Risk of Recidivism	2	Low	2013-10-29	Risk of Violence	2	Low	2013-10-29	2015-11-12	2015-12-02	1	105
182	margretta martin	margretta	martin	2013-10-29	Female	1985-08-27	30	25 - 45	Other	0	2	0	0	1	-1	2013-10-28 07:07:32	2013-10-29 09:49:38	13015030CF10A	2013-10-28		1	(F3)	Crim Use of Personal ID Info	0									0					Risk of Recidivism	2	Low	2013-10-29	Risk of Violence	2	Low	2013-10-29	2015-11-12	2015-12-02	1	764
183	robert hauselt	robert	hauselt	2013-02-26	Male	1985-03-18	31	25 - 45	Caucasian	0	10	0	0	13	-1	2013-02-25 06:43:30	2014-06-11 12:57:06	13003002CF10A		2013-02-26	0	(F3)	arrest case no charge	1	13005853CF10A	(F2)		2013-04-22	Burglary Unoccupied Dwelling				1	14015876MM10A	(M1)	2014-11-03	Battery	Risk of Recidivism	10	High	2013-02-26	Risk of Violence	7	Medium	2013-02-26	2013-02-25	2014-06-11	13	0
184	ivory pitts	ivory	pitts	2014-11-15	Male	1988-11-16	27	25 - 45	African-American	0	9	0	0	3	-1	2014-11-14 12:10:00	2014-11-15 11:29:02	14015327CF10A	2014-11-14		1	(F3)	Possession of Cocaine	1	15009423CF10A	(F3)		2015-07-22	Felony Driving While Lic Suspd				0					Risk of Recidivism	9	High	2014-11-15	Risk of Violence	4	Low	2014-11-15	2014-11-14	2014-11-15	3	0
185	monica salgado	monica	salgado	2014-09-11	Female	1984-11-29	31	25 - 45	Caucasian	0	2	0	0	1	-1	2014-09-10 07:01:03	2014-09-11 08:00:54	14012325CF10A	2014-09-10		1	(F3)	Grand Theft (Motor Vehicle)	0									0					Risk of Recidivism	2	Low	2014-09-11	Risk of Violence	2	Low	2014-09-11	2014-11-18	2015-02-16	1	0
185	monica salgado	monica	salgado	2014-09-11	Female	1984-11-29	31	25 - 45	Caucasian	0	2	0	0	1	-1	2014-09-10 07:01:03	2014-09-11 08:00:54	14012325CF10A	2014-09-10		1	(F3)	Grand Theft (Motor Vehicle)	0									0					Risk of Recidivism	2	Low	2014-09-11	Risk of Violence	2	Low	2014-09-11	2014-11-18	2015-02-16	1	158
186	aida fonseca	aida	fonseca	2014-06-06	Male	1969-03-28	47	Greater than 45	Hispanic	0	1	0	0	2	-1	2014-06-05 03:52:26	2014-06-06 02:22:21	14007808CF10A	2014-06-05		1	(F3)	Grand Theft in the 3rd Degree	0									0					Risk of Recidivism	1	Low	2014-06-06	Risk of Violence	1	Low	2014-06-06	2014-06-05	2014-06-06	2	0
187	isaac johnson	isaac	johnson	2013-12-06	Male	1960-02-11	56	Greater than 45	African-American	0	9	0	0	8	67	2014-02-11 09:01:26	2014-05-02 08:04:43	11014376CF10A		2013-09-18	79	(F3)	arrest case no charge	0									0					Risk of Recidivism	9	High	2013-12-06	Risk of Violence	3	Low	2013-12-06	2014-02-11	2014-05-02	8	0
187	isaac johnson	isaac	johnson	2013-12-06	Male	1960-02-11	56	Greater than 45	African-American	0	9	0	0	8	67	2014-02-11 09:01:26	2014-05-02 08:04:43	11014376CF10A		2013-09-18	79	(F3)	arrest case no charge	0									0					Risk of Recidivism	9	High	2013-12-06	Risk of Violence	3	Low	2013-12-06	2014-02-11	2014-05-02	8	147
188	gene park	gene	park	2014-09-29	Male	1982-07-09	33	25 - 45	Asian	0	8	0	0	2	14	2014-10-13 03:42:04	2014-10-27 01:08:43	14008527MO10A	2014-05-20		132	(MO3)	Failure To Pay Taxi Cab Charge	0									0					Risk of Recidivism	8	High	2014-09-29	Risk of Violence	8	High	2014-09-29	2014-10-13	2014-10-27	2	0
188	gene park	gene	park	2014-09-29	Male	1982-07-09	33	25 - 45	Asian	0	8	0	0	2	14	2014-10-13 03:42:04	2014-10-27 01:08:43	14008527MO10A	2014-05-20		132	(MO3)	Failure To Pay Taxi Cab Charge	0									0					Risk of Recidivism	8	High	2014-09-29	Risk of Violence	8	High	2014-09-29	2014-11-06	2015-02-12	2	28
188	gene park	gene	park	2014-09-29	Male	1982-07-09	33	25 - 45	Asian	0	8	0	0	2	14	2014-10-13 03:42:04	2014-10-27 01:08:43	14008527MO10A	2014-05-20		132	(MO3)	Failure To Pay Taxi Cab Charge	0									0					Risk of Recidivism	8	High	2014-09-29	Risk of Violence	8	High	2014-09-29	2014-11-06	2015-02-12	2	136
189	clifford matthews	clifford	matthews	2013-07-29	Male	1963-07-23	52	Greater than 45	Caucasian	0	9	0	0	3	-2	2013-07-27 10:50:36	2013-07-28 02:01:45	13014255MM10A	2013-07-27		2	(M1)	Battery	0									0					Risk of Recidivism	9	High	2013-07-29	Risk of Violence	6	Medium	2013-07-29	2013-07-27	2013-07-28	3	0
190	jamar dixon	jamar	dixon	2013-12-29	Male	1982-07-05	33	25 - 45	African-American	0	10	0	0	19	-1	2013-12-28 10:22:08	2013-12-29 07:10:39	13017898CF10A		2013-12-28	1	(F3)	arrest case no charge	1	15000209MM30A	(M2)		2015-01-18	Petit Theft				0					Risk of Recidivism	10	High	2013-12-29	Risk of Violence	7	Medium	2013-12-29	2014-08-08	2014-09-09	19	0
190	jamar dixon	jamar	dixon	2013-12-29	Male	1982-07-05	33	25 - 45	African-American	0	10	0	0	19	-1	2013-12-28 10:22:08	2013-12-29 07:10:39	13017898CF10A		2013-12-28	1	(F3)	arrest case no charge	1	15000209MM30A	(M2)		2015-01-18	Petit Theft				0					Risk of Recidivism	10	High	2013-12-29	Risk of Violence	7	Medium	2013-12-29	2014-09-09	2020-01-01	19	254
191	kenneth roberts	kenneth	roberts	2014-07-21	Male	1954-06-20	61	Greater than 45	Caucasian	0	4	0	0	0	-1	2014-07-20 09:28:43	2014-08-04 11:02:06	14009895CF10A	2014-07-20		1	(F3)	Obstruct Officer W/Violence	0									0					Risk of Recidivism	4	Low	2014-07-21	Risk of Violence	1	Low	2014-07-21	2014-07-20	2014-08-04	0	14
192	sue middleton	sue	middleton	2014-03-31	Female	1952-02-19	64	Greater than 45	Caucasian	0	1	0	0	2	-47	2014-02-12 04:23:22	2014-02-12 01:49:55	14005660MU10A	2014-02-11		48	(M1)	Resist/Obstruct W/O Violence	0									0					Risk of Recidivism	1	Low	2014-03-31	Risk of Violence	1	Low	2014-03-31	2014-02-12	2014-02-12	2	0
193	brandon velasquez	brandon	velasquez	2014-08-12	Male	1993-09-10	22	Less than 25	Caucasian	0	6	0	0	4	-36	2014-07-07 04:10:30	2014-07-21 09:38:10	14009307CF10A	2014-07-07		36	(F3)	Possession Of Alprazolam	1	15004296MM40A	(M2)		2015-10-29	Petit Theft				0					Risk of Recidivism	6	Medium	2014-08-12	Risk of Violence	8	High	2014-08-12	2014-12-29	2015-01-17	4	0
193	brandon velasquez	brandon	velasquez	2014-08-12	Male	1993-09-10	22	Less than 25	Caucasian	0	6	0	0	4	-36	2014-07-07 04:10:30	2014-07-21 09:38:10	14009307CF10A	2014-07-07		36	(F3)	Possession Of Alprazolam	1	15004296MM40A	(M2)		2015-10-29	Petit Theft				0					Risk of Recidivism	6	Medium	2014-08-12	Risk of Violence	8	High	2014-08-12	2014-12-29	2015-01-17	4	158
194	ryan pottle	ryan	pottle	2013-09-17	Male	1974-03-30	42	25 - 45	Caucasian	0	3	0	0	6	-4	2013-09-13 12:01:41	2013-09-13 09:01:37	13012918CF10A	2013-09-12		5	(F3)	Possession Of Alprazolam	0									0					Risk of Recidivism	3	Low	2013-09-17	Risk of Violence	1	Low	2013-09-17	2014-10-30	2015-01-24	6	0
194	ryan pottle	ryan	pottle	2013-09-17	Male	1974-03-30	42	25 - 45	Caucasian	0	3	0	0	6	-4	2013-09-13 12:01:41	2013-09-13 09:01:37	13012918CF10A	2013-09-12		5	(F3)	Possession Of Alprazolam	0									0					Risk of Recidivism	3	Low	2013-09-17	Risk of Violence	1	Low	2013-09-17	2015-04-14	2015-04-21	6	494
194	ryan pottle	ryan	pottle	2013-09-17	Male	1974-03-30	42	25 - 45	Caucasian	0	3	0	0	6	-4	2013-09-13 12:01:41	2013-09-13 09:01:37	13012918CF10A	2013-09-12		5	(F3)	Possession Of Alprazolam	0									0					Risk of Recidivism	3	Low	2013-09-17	Risk of Violence	1	Low	2013-09-17	2015-04-14	2015-04-21	6	581
195	brooke ferrell	brooke	ferrell	2013-12-23	Female	1991-01-14	25	25 - 45	Caucasian	0	4	0	0	2	-1	2013-12-22 01:36:59	2013-12-25 02:33:32	13016742CF10A		2013-12-22	1	(F3)	arrest case no charge	0									0					Risk of Recidivism	4	Low	2013-12-23	Risk of Violence	5	Medium	2013-12-23	2014-12-17	2015-01-07	2	2
195	brooke ferrell	brooke	ferrell	2013-12-23	Female	1991-01-14	25	25 - 45	Caucasian	0	4	0	0	2	-1	2013-12-22 01:36:59	2013-12-25 02:33:32	13016742CF10A		2013-12-22	1	(F3)	arrest case no charge	0									0					Risk of Recidivism	4	Low	2013-12-23	Risk of Violence	5	Medium	2013-12-23	2014-12-17	2015-01-07	2	380
196	brian straub	brian	straub	2014-05-29	Male	1989-02-10	27	25 - 45	Caucasian	0	1	0	0	0	-1	2014-05-28 07:35:12	2014-05-29 12:27:01	14007403CF10A	2014-05-28		1	(F3)	Grand Theft in the 3rd Degree	0									0					Risk of Recidivism	1	Low	2014-05-29	Risk of Violence	2	Low	2014-05-29	2014-05-28	2014-05-29	0	0
197	kyle hoyt	kyle	hoyt	2013-11-19	Male	1985-05-01	30	25 - 45	Caucasian	0	2	0	0	1	-20	2013-10-30 06:36:57	2013-11-03 02:08:43	13015141CF10A	2013-10-30		20	(M2)	Agg Fleeing and Eluding	0									0					Risk of Recidivism	2	Low	2013-11-19	Risk of Violence	2	Low	2013-11-19	2013-10-30	2013-11-03	1	0
199	ritesh sukhlall	ritesh	sukhlall	2013-08-29	Male	1987-05-12	28	25 - 45	Caucasian	0	1	0	0	2				12018849CF10A		2013-03-21	161	(F3)	arrest case no charge	0									0					Risk of Recidivism	1	Low	2013-08-29	Risk of Violence	2	Low	2013-08-29			2	0
200	nicola spenceburrell	nicola	spenceburrell	2013-12-30	Female	1978-06-30	37	25 - 45	Other	0	2	0	0	2	-1	2013-12-29 10:42:45	2013-12-31 04:10:00	13012779MM10A	2013-05-22		222	(M2)	Petit Theft	0									0					Risk of Recidivism	2	Low	2013-12-30	Risk of Violence	1	Low	2013-12-30	2013-12-29	2013-12-31	2	1
201	kevin herrera	kevin	herrera	2014-07-07	Male	1994-11-02	21	Less than 25	Caucasian	0	5	0	0	1	-1	2014-07-06 07:37:31	2014-07-07 10:52:16	14009281CF10A	2014-07-06		1	(F3)	Possession of Cannabis	0									0					Risk of Recidivism	5	Medium	2014-07-07	Risk of Violence	6	Medium	2014-07-07	2014-07-06	2014-07-07	1	0
202	travis wilson	travis	wilson	2014-12-19	Male	1988-04-12	28	25 - 45	Caucasian	0	2	0	0	0	-1	2014-12-18 11:16:49	2014-12-19 08:34:46	14017828MM10A	2014-12-18		1	(M2)	Disorderly Intoxication	1	16001434MM10A	(M1)	0	2016-02-13	Viol Injunct Domestic Violence	2016-02-13	2016-02-14		0					Risk of Recidivism	2	Low	2014-12-19	Risk of Violence	3	Low	2014-12-19	2015-02-17	2015-02-17	0	0
202	travis wilson	travis	wilson	2014-12-19	Male	1988-04-12	28	25 - 45	Caucasian	0	2	0	0	0	-1	2014-12-18 11:16:49	2014-12-19 08:34:46	14017828MM10A	2014-12-18		1	(M2)	Disorderly Intoxication	1	16001434MM10A	(M1)	0	2016-02-13	Viol Injunct Domestic Violence	2016-02-13	2016-02-14		0					Risk of Recidivism	2	Low	2014-12-19	Risk of Violence	3	Low	2014-12-19	2016-02-13	2016-02-14	0	60
203	pamela goodwin	pamela	goodwin	2014-02-07	Female	1991-09-24	24	Less than 25	African-American	0	2	0	0	0	-1	2014-02-06 01:25:28	2014-02-08 12:00:39	14002123MM10A	2014-02-06		1	(M1)	Battery	0									0					Risk of Recidivism	2	Low	2014-02-07	Risk of Violence	3	Low	2014-02-07	2014-02-06	2014-02-08	0	1
204	kirkland banks	kirkland	banks	2014-03-19	Male	1979-02-24	37	25 - 45	African-American	0	8	0	0	13	-29	2014-02-18 07:29:11	2014-03-19 10:23:08	14002318CF10A		2014-03-14	5	(F3)	arrest case no charge	0									0					Risk of Recidivism	8	High	2014-03-19	Risk of Violence	7	Medium	2014-03-19	2014-07-07	2014-08-16	13	0
204	kirkland banks	kirkland	banks	2014-03-19	Male	1979-02-24	37	25 - 45	African-American	0	8	0	0	13	-29	2014-02-18 07:29:11	2014-03-19 10:23:08	14002318CF10A		2014-03-14	5	(F3)	arrest case no charge	0									0					Risk of Recidivism	8	High	2014-03-19	Risk of Violence	7	Medium	2014-03-19	2014-07-07	2014-08-16	13	150
205	devonta grant	devonta	grant	2013-10-22	Male	1993-09-21	22	Less than 25	African-American	0	9	0	0	0	-1	2013-10-21 07:05:37	2013-10-29 02:55:00	13014711CF10A	2013-10-21		1	(F2)	Burglary Unoccupied Dwelling	0									0					Risk of Recidivism	9	High	2013-10-22	Risk of Violence	8	High	2013-10-22	2014-09-23	2020-01-01	0	7
205	devonta grant	devonta	grant	2013-10-22	Male	1993-09-21	22	Less than 25	African-American	0	9	0	0	0	-1	2013-10-21 07:05:37	2013-10-29 02:55:00	13014711CF10A	2013-10-21		1	(F2)	Burglary Unoccupied Dwelling	0									0					Risk of Recidivism	9	High	2013-10-22	Risk of Violence	8	High	2013-10-22	2014-09-23	2020-01-01	0	892
206	elizabeth pozo	elizabeth	pozo	2014-11-19	Female	1987-01-23	29	25 - 45	Caucasian	0	4	1	0	10	-1	2014-11-18 07:08:18	2014-11-25 09:31:21	14015588CF10A	2014-11-18		1	(F3)	Grand Theft in the 3rd Degree	1	15003284CF10A	(F3)	1	2015-03-10	Uttering a Forged Instrument	2015-03-11	2015-04-18		0					Risk of Recidivism	4	Low	2014-11-19	Risk of Violence	2	Low	2014-11-19	2014-12-29	2015-02-05	10	6
206	elizabeth pozo	elizabeth	pozo	2014-11-19	Female	1987-01-23	29	25 - 45	Caucasian	0	4	1	0	10	-1	2014-11-18 07:08:18	2014-11-25 09:31:21	14015588CF10A	2014-11-18		1	(F3)	Grand Theft in the 3rd Degree	1	15003284CF10A	(F3)	1	2015-03-10	Uttering a Forged Instrument	2015-03-11	2015-04-18		0					Risk of Recidivism	4	Low	2014-11-19	Risk of Violence	2	Low	2014-11-19	2014-12-29	2015-02-05	10	78
207	stephanie marquez	stephanie	marquez	2014-04-26	Female	1990-08-29	25	25 - 45	Caucasian	0	3	0	0	0	-1	2014-04-25 06:18:00	2014-04-26 01:28:28	14005792CF10A	2014-04-25		1	(F3)	Uttering a Forged Instrument	0									0					Risk of Recidivism	3	Low	2014-04-26	Risk of Violence	3	Low	2014-04-26	2015-09-09	2015-09-29	0	0
207	stephanie marquez	stephanie	marquez	2014-04-26	Female	1990-08-29	25	25 - 45	Caucasian	0	3	0	0	0	-1	2014-04-25 06:18:00	2014-04-26 01:28:28	14005792CF10A	2014-04-25		1	(F3)	Uttering a Forged Instrument	0									0					Risk of Recidivism	3	Low	2014-04-26	Risk of Violence	3	Low	2014-04-26	2015-09-09	2015-09-29	0	521
208	erik kadler	erik	kadler	2014-01-27	Male	1971-11-26	44	25 - 45	Caucasian	0	2	0	0	2	0	2014-01-27 02:05:45	2014-01-27 01:32:12	14001438MM10A	2014-01-26		1	(M1)	Battery	1	14015569MM10A	(M1)		2014-08-31	Viol Injunct Domestic Violence				0					Risk of Recidivism	2	Low	2014-01-27	Risk of Violence	1	Low	2014-01-27	2014-01-27	2014-01-27	2	0
209	jessica ruiz	jessica	ruiz	2014-04-04	Female	1985-06-15	30	25 - 45	Hispanic	0	5	0	0	4	-35	2014-02-28 01:37:01	2014-02-28 09:21:54	14002842CF10A	2014-02-27		36	(F3)	Battery on Law Enforc Officer	1	14007741MM10A	(M1)	1	2014-05-11	Battery	2014-05-12	2014-06-13		1	14007741MM10A	(M1)	2014-05-11	Battery	Risk of Recidivism	5	Medium	2014-04-04	Risk of Violence	5	Medium	2014-04-04	2015-04-10	2015-12-07	4	0
210	taquawn davis	taquawn	davis	2013-01-02	Male	1984-01-26	32	25 - 45	African-American	0	7	0	0	3	-1	2013-01-01 07:06:35	2013-01-09 08:36:21	13000037CF10A	2013-01-01		1	(F3)	Possession of Cocaine	1	14012043CF10A	(F3)		2014-09-04	Possession of Cocaine				0					Risk of Recidivism	7	Medium	2013-01-02	Risk of Violence	3	Low	2013-01-02	2014-02-19	2014-02-27	3	7
210	taquawn davis	taquawn	davis	2013-01-02	Male	1984-01-26	32	25 - 45	African-American	0	7	0	0	3	-1	2013-01-01 07:06:35	2013-01-09 08:36:21	13000037CF10A	2013-01-01		1	(F3)	Possession of Cocaine	1	14012043CF10A	(F3)		2014-09-04	Possession of Cocaine				0					Risk of Recidivism	7	Medium	2013-01-02	Risk of Violence	3	Low	2013-01-02	2014-02-19	2014-02-27	3	421
211	jimmy rivera	jimmy	rivera	2014-05-25	Male	1963-01-15	53	Greater than 45	Hispanic	0	4	0	0	1	-1	2014-05-24 05:45:16	2014-05-25 09:15:12	14007263CF10A	2014-05-24		1	(F3)	Resist Officer w/Violence	0									0					Risk of Recidivism	4	Low	2014-05-25	Risk of Violence	1	Low	2014-05-25	2014-05-24	2014-05-25	1	0
212	ibrahim atli	ibrahim	atli	2014-11-29	Male	1981-08-01	34	25 - 45	Other	0	2	0	0	1	0	2014-11-29 04:14:25	2014-12-01 12:36:46	14016922MM10A	2014-11-29		0	(M1)	Battery	0									0					Risk of Recidivism	2	Low	2014-11-29	Risk of Violence	1	Low	2014-11-29	2014-11-29	2014-12-01	1	2
213	daniel crowder	daniel	crowder	2013-09-05	Male	1984-11-03	31	25 - 45	Caucasian	0	3	0	0	2	-16	2013-08-20 05:28:11	2013-09-04 08:35:41	13015850MM10A	2013-08-20		16	(M1)	Resist/Obstruct W/O Violence	1	14000807MM10A	(M1)		2013-10-23	Theft/To Deprive				0					Risk of Recidivism	3	Low	2013-09-05	Risk of Violence	3	Low	2013-09-05	2013-08-20	2013-09-04	2	0
214	terry jewel	terry	jewel	2013-07-31	Male	1989-02-05	27	25 - 45	African-American	0	10	0	0	5	20	2013-08-20 12:52:21	2013-08-27 06:26:34	13006868CF10A	2013-05-14		78	(F3)	Possession of Cocaine	0									0					Risk of Recidivism	10	High	2013-07-31	Risk of Violence	10	High	2013-07-31	2013-08-20	2013-08-27	5	0
214	terry jewel	terry	jewel	2013-07-31	Male	1989-02-05	27	25 - 45	African-American	0	10	0	0	5	20	2013-08-20 12:52:21	2013-08-27 06:26:34	13006868CF10A	2013-05-14		78	(F3)	Possession of Cocaine	0									0					Risk of Recidivism	10	High	2013-07-31	Risk of Violence	10	High	2013-07-31	2013-08-27	2020-01-01	5	975
215	brandon flanders	brandon	flanders	2013-01-17	Male	1985-04-16	31	25 - 45	African-American	0	2	0	0	1	-1	2013-01-16 05:37:32	2013-01-17 07:15:11	13001130MM10A	2013-01-16		1	(M2)	Lewdness Violation	1	16012589TC40A	(M2)		2016-03-02	Driving License Suspended				0					Risk of Recidivism	2	Low	2013-01-17	Risk of Violence	3	Low	2013-01-17	2013-01-16	2013-01-17	1	0
216	jay shore	jay	shore	2013-04-02	Male	1957-01-07	59	Greater than 45	Caucasian	0	2	0	0	1	-1	2013-04-01 11:13:32	2013-04-02 01:06:22	13004675CF10A	2013-04-01		1	(F3)	Possession of Cocaine	1	13041937TC10A	(M2)	5	2013-09-13	Expired DL More Than 6 Months	2013-09-18	2013-09-25		0					Risk of Recidivism	2	Low	2013-04-02	Risk of Violence	1	Low	2013-04-02	2014-02-26	2014-04-22	1	0
217	jermaine ramsey	jermaine	ramsey	2014-02-28	Male	1987-11-23	28	25 - 45	African-American	0	10	0	0	15	0	2014-02-28 12:12:20	2014-04-10 06:53:07	14002837CF10A	2014-02-27		1	(F2)	Poss of Firearm by Convic Felo	0									0					Risk of Recidivism	10	High	2014-02-28	Risk of Violence	8	High	2014-02-28	2014-04-10	2020-01-01	15	763
218	jean murphy	jean	murphy	2013-04-24	Female	1971-02-05	45	Greater than 45	Caucasian	0	4	0	0	4				11000917CF10A		2012-04-14	375	(F3)	arrest case no charge	0									0					Risk of Recidivism	4	Low	2013-04-24	Risk of Violence	3	Low	2013-04-24			4	0
219	michael rosato	michael	rosato	2014-11-10	Male	1992-12-04	23	Less than 25	Caucasian	0	3	0	0	0	-1	2014-11-09 07:59:51	2014-11-10 01:38:29	14041230MU10A	2014-11-09		1	(M1)	Driving Under The Influence	0									0					Risk of Recidivism	3	Low	2014-11-10	Risk of Violence	3	Low	2014-11-10	2014-11-09	2014-11-10	0	0
220	taveunshae livingston	taveunshae	livingston	2013-11-20	Female	1995-09-05	20	Less than 25	African-American	1	10	0	0	1	0	2013-11-20 09:36:33	2013-11-23 04:06:00	13014098CF10A		2013-11-20	0	(F3)	arrest case no charge	0									0					Risk of Recidivism	10	High	2013-11-20	Risk of Violence	10	High	2013-11-20	2014-03-19	2014-03-28	1	3
220	taveunshae livingston	taveunshae	livingston	2013-11-20	Female	1995-09-05	20	Less than 25	African-American	1	10	0	0	1	0	2013-11-20 09:36:33	2013-11-23 04:06:00	13014098CF10A		2013-11-20	0	(F3)	arrest case no charge	0									0					Risk of Recidivism	10	High	2013-11-20	Risk of Violence	10	High	2013-11-20	2015-09-30	2015-10-06	1	128
220	taveunshae livingston	taveunshae	livingston	2013-11-20	Female	1995-09-05	20	Less than 25	African-American	1	10	0	0	1	0	2013-11-20 09:36:33	2013-11-23 04:06:00	13014098CF10A		2013-11-20	0	(F3)	arrest case no charge	0									0					Risk of Recidivism	10	High	2013-11-20	Risk of Violence	10	High	2013-11-20	2015-09-30	2015-10-06	1	685
221	marlon hyde	marlon	hyde	2014-07-28	Male	1974-03-24	42	25 - 45	African-American	0	1	0	0	2	-41	2014-06-17 12:17:27	2014-06-28 01:24:02	14008383CF10A		2014-06-17	41	(F2)	arrest case no charge	0									0					Risk of Recidivism	1	Low	2014-07-28	Risk of Violence	1	Low	2014-07-28	2014-06-17	2014-06-28	2	0
222	gia dreiss	gia	dreiss	2013-05-14	Female	1973-03-13	43	25 - 45	Caucasian	0	1	0	0	0	0	2013-05-14 04:01:02	2013-05-15 03:11:16	13009346MM10A	2013-05-14		0	(M1)	DUI Level 0.15 Or Minor In Veh	0									0					Risk of Recidivism	1	Low	2013-05-14	Risk of Violence	1	Low	2013-05-14	2013-05-14	2013-05-15	0	1
223	henry davis	henry	davis	2014-04-19	Male	1977-12-28	38	25 - 45	African-American	1	8	1	0	9	-1	2014-04-18 02:31:13	2014-05-01 05:39:49	14005427CF10A	2014-04-18		1	(F3)	Possession of Cocaine	1	14012795MM10A	(M1)	0	2014-08-26	Resist/Obstruct W/O Violence	2014-08-26	2014-08-27		0					Risk of Recidivism	8	High	2014-04-19	Risk of Violence	4	Low	2014-04-19	2014-08-26	2014-08-27	9	12
224	travis lee	travis	lee	2014-12-19	Male	1983-08-11	32	25 - 45	African-American	0	6	0	0	11	-2	2014-12-17 02:03:04	2014-12-18 08:41:05	14016717CF10A	2014-12-17		2	(F3)	Poss Pyrrolidinovalerophenone	1	15000511CF10A	(F3)	0	2015-01-12	Poss Pyrrolidinovalerophenone	2015-01-12	2015-02-17		1	15004732CF10A	(F1)	2015-04-10	Manslaughter with Weapon	Risk of Recidivism	6	Medium	2014-12-19	Risk of Violence	5	Medium	2014-12-19	2015-01-12	2015-02-17	11	0
225	justin poux	justin	poux	2013-12-26	Male	1982-08-26	33	25 - 45	African-American	0	5	0	0	8	-1	2013-12-25 07:37:38	2013-12-26 01:30:44	13023762MM10A	2013-12-25		1	(M2)	Assault	1	14003098MM40A	(M1)		2014-07-01	Possess Cannabis/20 Grams Or Less				1	14011238CF10A	(M1)	2014-08-16	Battery	Risk of Recidivism	5	Medium	2013-12-26	Risk of Violence	2	Low	2013-12-26	2015-07-16	2015-07-16	8	0
226	robert williams	robert	williams	2014-09-28	Male	1960-07-31	55	Greater than 45	African-American	0	8	0	0	4	-1	2014-09-27 03:38:45	2014-10-13 09:23:13	10003097MO10A		2010-09-09	1480	(MO3)	arrest case no charge	0									0					Risk of Recidivism	8	High	2014-09-28	Risk of Violence	3	Low	2014-09-28	2015-03-24	2015-12-14	4	15
226	robert williams	robert	williams	2014-09-28	Male	1960-07-31	55	Greater than 45	African-American	0	8	0	0	4	-1	2014-09-27 03:38:45	2014-10-13 09:23:13	10003097MO10A		2010-09-09	1480	(MO3)	arrest case no charge	0									0					Risk of Recidivism	8	High	2014-09-28	Risk of Violence	3	Low	2014-09-28	2016-03-22	2016-04-01	4	442
226	robert williams	robert	williams	2014-09-28	Male	1960-07-31	55	Greater than 45	African-American	0	8	0	0	4	-1	2014-09-27 03:38:45	2014-10-13 09:23:13	10003097MO10A		2010-09-09	1480	(MO3)	arrest case no charge	0									0					Risk of Recidivism	8	High	2014-09-28	Risk of Violence	3	Low	2014-09-28	2016-03-22	2016-04-01	4	551
227	linda etienne	linda	etienne	2014-10-23	Female	1985-01-04	31	25 - 45	African-American	0	3	0	0	0	-1	2014-10-22 11:17:38	2014-10-24 06:08:10	14014216CF10A	2014-10-22		1	(F3)	Possession of Oxycodone	1	15015591TC20A	(M2)	39	2015-02-20	Unlaw LicTag/Sticker Attach	2015-03-31	2015-05-07		0					Risk of Recidivism	3	Low	2014-10-23	Risk of Violence	2	Low	2014-10-23	2015-01-07	2015-02-11	0	1
227	linda etienne	linda	etienne	2014-10-23	Female	1985-01-04	31	25 - 45	African-American	0	3	0	0	0	-1	2014-10-22 11:17:38	2014-10-24 06:08:10	14014216CF10A	2014-10-22		1	(F3)	Possession of Oxycodone	1	15015591TC20A	(M2)	39	2015-02-20	Unlaw LicTag/Sticker Attach	2015-03-31	2015-05-07		0					Risk of Recidivism	3	Low	2014-10-23	Risk of Violence	2	Low	2014-10-23	2015-01-07	2015-02-11	0	111
228	nafisa picou	nafisa	picou	2013-01-11	Female	1983-04-18	33	25 - 45	African-American	0	9	0	0	7	-1	2013-01-10 01:18:15	2013-02-05 05:36:46	13000460CF10A	2013-01-10		1	(F3)	Possession of Cocaine	1	13014334CF10A	(M2)	0	2013-10-13	Prostitution/Lewd Act Assignation	2013-10-13	2013-11-01		0					Risk of Recidivism	9	High	2013-01-11	Risk of Violence	9	High	2013-01-11	2013-10-13	2013-11-01	7	25
229	michael corker	michael	corker	2013-04-16	Male	1988-09-20	27	25 - 45	African-American	0	9	0	0	2	-1	2013-04-15 05:49:27	2013-04-16 07:48:50	13005402CF10A	2013-04-15		1	(F3)	Tampering With Physical Evidence	1	13008652MM10A	(M1)	0	2013-05-04	Possess Cannabis/20 Grams Or Less	2013-05-04	2013-05-04		0					Risk of Recidivism	9	High	2013-04-16	Risk of Violence	8	High	2013-04-16	2013-05-04	2013-05-04	2	0
229	michael corker	michael	corker	2013-04-16	Male	1988-09-20	27	25 - 45	African-American	0	9	0	0	2	-1	2013-04-15 05:49:27	2013-04-16 07:48:50	13005402CF10A	2013-04-15		1	(F3)	Tampering With Physical Evidence	1	13008652MM10A	(M1)	0	2013-05-04	Possess Cannabis/20 Grams Or Less	2013-05-04	2013-05-04		0					Risk of Recidivism	9	High	2013-04-16	Risk of Violence	8	High	2013-04-16	2013-05-04	2013-05-04	2	18
230	gary shipman	gary	shipman	2014-11-03	Male	1963-11-12	52	Greater than 45	African-American	0	1	0	0	0	-1	2014-11-02 01:01:20	2014-11-03 01:37:13	14015863MM10A	2014-11-02		1	(M2)	Assault	0									0					Risk of Recidivism	1	Low	2014-11-03	Risk of Violence	1	Low	2014-11-03	2014-11-02	2014-11-03	0	0
231	tichina carr	tichina	carr	2013-12-07	Female	1995-07-13	20	Less than 25	African-American	0	6	0	0	0	0	2013-12-07 03:39:31	2013-12-07 07:28:49	13016953CF10A	2013-12-06		1	(F3)	Grand Theft in the 3rd Degree	0									0					Risk of Recidivism	6	Medium	2013-12-07	Risk of Violence	8	High	2013-12-07	2013-12-07	2013-12-07	0	0
232	heather baker	heather	baker	2014-01-27	Female	1989-07-26	26	25 - 45	Caucasian	0	6	0	0	0	-2	2014-01-25 04:45:14	2014-01-26 02:13:40	14002839MU10A	2014-01-25		2	(M2)	Fail To Obey Police Officer	0									0					Risk of Recidivism	6	Medium	2014-01-27	Risk of Violence	3	Low	2014-01-27	2014-01-25	2014-01-26	0	0
233	keanorris scott	keanorris	scott	2014-08-13	Male	1991-01-31	25	25 - 45	African-American	0	10	0	0	4	-1	2014-08-12 03:25:00	2015-05-01 12:01:36	14011022CF10A	2014-08-12		1	(M1)	Burglary Dwelling Occupied	0									0					Risk of Recidivism	10	High	2014-08-13	Risk of Violence	10	High	2014-08-13	2014-08-12	2015-05-01	4	261
234	cynthia gray	cynthia	gray	2013-04-27	Female	1954-11-14	61	Greater than 45	African-American	0	1	0	0	1	-1	2013-04-26 07:00:16	2013-04-27 01:09:09	13007217CF10A	2013-04-26		1	(F3)	Solicit Purchase Cocaine	1	14001755MM30A	(M2)		2014-10-23	Petit Theft				0					Risk of Recidivism	1	Low	2013-04-27	Risk of Violence	1	Low	2013-04-27	2013-04-26	2013-04-27	1	0
235	paul simpson	paul	simpson	2013-05-15	Male	1963-07-01	52	Greater than 45	Other	0	7	0	0	13	-1	2013-05-14 09:51:40	2013-05-16 03:32:12	13006873CF10A	2013-05-14		1	(F3)	Felony Petit Theft	1	13011903MM10A	(M2)	0	2013-06-20	Petit Theft	2013-06-20	2013-06-20		0					Risk of Recidivism	7	Medium	2013-05-15	Risk of Violence	6	Medium	2013-05-15	2013-06-20	2013-06-20	13	1
235	paul simpson	paul	simpson	2013-05-15	Male	1963-07-01	52	Greater than 45	Other	0	7	0	0	13	-1	2013-05-14 09:51:40	2013-05-16 03:32:12	13006873CF10A	2013-05-14		1	(F3)	Felony Petit Theft	1	13011903MM10A	(M2)	0	2013-06-20	Petit Theft	2013-06-20	2013-06-20		0					Risk of Recidivism	7	Medium	2013-05-15	Risk of Violence	6	Medium	2013-05-15	2013-06-20	2013-06-20	13	36
236	carlos lacayo	carlos	lacayo	2014-02-05	Male	1953-02-03	63	Greater than 45	Hispanic	0	1	0	0	1	-26	2014-01-10 09:45:32	2014-01-25 05:08:15	13002681CF10A		2014-01-10	26	(F3)	arrest case no charge	0									0					Risk of Recidivism	1	Low	2014-02-05	Risk of Violence	1	Low	2014-02-05	2014-01-10	2014-01-25	1	0
238	tiffany reid	tiffany	reid	2014-04-23	Female	1984-02-01	32	25 - 45	African-American	0	10	0	0	4	-7	2014-04-16 09:55:10	2014-04-23 05:27:00	13017942CF10A		2014-04-16	7	(F3)	arrest case no charge	1	15006709CF10A	(F3)	0	2015-05-23	Aggravated Assault W/Dead Weap	2015-05-23	2015-09-18		1	15006709CF10A	(F3)	2015-05-23	Aggravated Assault W/Dead Weap	Risk of Recidivism	10	High	2014-04-23	Risk of Violence	9	High	2014-04-23	2015-05-23	2015-09-18	4	0
239	joshua ortiz	joshua	ortiz	2013-09-06	Male	1986-08-27	29	25 - 45	Hispanic	0	4	0	0	1	-1	2013-09-05 06:24:46	2013-09-06 03:39:35	13012529CF10A	2013-09-05		1	(F3)	Grand Theft in the 3rd Degree	0									0					Risk of Recidivism	4	Low	2013-09-06	Risk of Violence	4	Low	2013-09-06	2013-09-05	2013-09-06	1	0
240	rabina humphrey	rabina	humphrey	2013-01-10	Female	1969-07-04	46	Greater than 45	Other	0	2	0	0	1				12016046CF10A	2012-10-30		72	(F1)	Grand Theft in the 1st Degree	0									0					Risk of Recidivism	2	Low	2013-01-10	Risk of Violence	1	Low	2013-01-10			1	0
241	pilar melvin	pilar	melvin	2013-03-10	Female	1989-12-04	26	25 - 45	African-American	0	4	0	0	2	-1	2013-03-09 07:15:19	2013-03-10 01:31:38	13004741MM10A	2013-03-09		1	(M1)	Driving Under The Influence	1	14004570TC10A	(M2)		2013-10-25	Susp Drivers Lic 1st Offense				0					Risk of Recidivism	4	Low	2013-03-10	Risk of Violence	4	Low	2013-03-10	2013-03-09	2013-03-10	2	0
242	dwayne powell	dwayne	powell	2013-06-27	Male	1961-03-09	55	Greater than 45	African-American	0	1	0	0	3	-51	2013-05-07 01:06:57	2013-05-08 03:17:33	13008769MM10A	2013-05-06		52	(M1)	Battery	0									0					Risk of Recidivism	1	Low	2013-06-27	Risk of Violence	1	Low	2013-06-27	2013-05-07	2013-05-08	3	0
243	bryan sandrin	bryan	sandrin	2014-02-11	Male	1976-06-30	39	25 - 45	Caucasian	1	4	0	0	1	-1	2014-02-10 10:59:01	2014-02-14 09:09:06	09018753TC10A	2009-07-15		1672	(X)		0									0					Risk of Recidivism	4	Low	2014-02-11	Risk of Violence	4	Low	2014-02-11	2014-02-10	2014-02-14	1	3
244	rachel otto	rachel	otto	2013-05-02	Female	1985-07-19	30	25 - 45	Caucasian	0	7	0	0	3	0	2013-05-02 04:01:43	2014-10-14 06:03:58	13006294CF10A	2013-05-01		1	(F3)	Possession Of Carisoprodol	1	13007159CF10A	(F3)	554	2013-05-16	Fraudulent Use of Credit Card	2014-11-21	2014-12-02		0					Risk of Recidivism	7	Medium	2013-05-02	Risk of Violence	4	Low	2013-05-02	2013-05-02	2014-10-14	3	0
245	jeffery jean	jeffery	jean	2013-03-02	Male	1985-05-30	30	25 - 45	African-American	0	7	0	0	1	0	2013-03-02 01:19:52	2013-05-11 04:23:17	13003159CF10A	2013-03-01		1	(F7)	Burglary Conveyance Assault/Bat	0									0					Risk of Recidivism	7	Medium	2013-03-02	Risk of Violence	8	High	2013-03-02	2014-03-04	2014-03-07	1	70
245	jeffery jean	jeffery	jean	2013-03-02	Male	1985-05-30	30	25 - 45	African-American	0	7	0	0	1	0	2013-03-02 01:19:52	2013-05-11 04:23:17	13003159CF10A	2013-03-01		1	(F7)	Burglary Conveyance Assault/Bat	0									0					Risk of Recidivism	7	Medium	2013-03-02	Risk of Violence	8	High	2013-03-02	2014-03-04	2014-03-07	1	370
246	michael cormier	michael	cormier	2013-09-26	Male	1967-08-21	48	Greater than 45	Caucasian	0	2	0	0	2	-1	2013-09-25 12:51:27	2013-09-26 08:42:11	13018327MM10A	2013-09-25		1	(M1)	Battery	0									0					Risk of Recidivism	2	Low	2013-09-26	Risk of Violence	1	Low	2013-09-26	2013-09-25	2013-09-26	2	0
247	freddy mitchell-mejia	freddy	mitchell-mejia	2014-12-30	Male	1982-06-13	33	25 - 45	Caucasian	0	1	0	0	0	-1	2014-12-29 07:56:52	2014-12-31 03:36:29	14017174CF10A	2014-12-29		1	(M1)	Felony Battery (Dom Strang)	0									0					Risk of Recidivism	1	Low	2014-12-30	Risk of Violence	1	Low	2014-12-30	2014-12-29	2014-12-31	0	1
248	marquis brantley	marquis	brantley	2013-05-16	Male	1993-05-25	22	Less than 25	African-American	0	2	0	0	1	-1	2013-05-15 12:16:21	2013-05-16 09:03:09	13006968CF10A		2013-05-15	1	(F3)	arrest case no charge	0									0					Risk of Recidivism	2	Low	2013-05-16	Risk of Violence	4	Low	2013-05-16	2014-11-14	2015-05-21	1	0
248	marquis brantley	marquis	brantley	2013-05-16	Male	1993-05-25	22	Less than 25	African-American	0	2	0	0	1	-1	2013-05-15 12:16:21	2013-05-16 09:03:09	13006968CF10A		2013-05-15	1	(F3)	arrest case no charge	0									0					Risk of Recidivism	2	Low	2013-05-16	Risk of Violence	4	Low	2013-05-16	2014-11-14	2015-05-21	1	735
249	brian fuller	brian	fuller	2013-02-11	Male	1970-03-27	46	Greater than 45	Caucasian	0	1	0	0	6	22	2013-03-05 09:31:17	2013-03-28 01:40:17	13000558CF10A	2013-01-11		31	(F3)	Driving While License Revoked	1	13007870MM10A	(M2)	0	2013-03-05	Susp Drivers Lic 1st Offense	2013-03-05	2013-03-28		0					Risk of Recidivism	1	Low	2013-02-11	Risk of Violence	1	Low	2013-02-11	2013-03-05	2013-03-28	6	0
250	derek larsen	derek	larsen	2014-08-17	Male	1974-05-20	41	25 - 45	Caucasian	0	10	0	0	5	-1	2014-08-16 09:24:16	2014-11-20 06:31:39	14011225CF10A	2014-08-16		1	(F3)	Felony Petit Theft	0									0					Risk of Recidivism	10	High	2014-08-17	Risk of Violence	4	Low	2014-08-17	2014-11-20	2016-04-13	5	605
251	tanya gordon	tanya	gordon	2014-03-19	Female	1966-09-25	49	Greater than 45	Caucasian	0	6	0	0	6	-56	2014-01-22 07:46:15	2014-01-27 08:19:45	14000940CF10A	2014-01-22		56	(F3)	Crim Use of Personal ID Info	0									0					Risk of Recidivism	6	Medium	2014-03-19	Risk of Violence	2	Low	2014-03-19	2014-01-22	2014-01-27	6	0
252	matthew segal	matthew	segal	2013-04-20	Male	1984-08-30	31	25 - 45	Caucasian	0	5	0	0	0	0	2013-04-20 02:52:11	2013-04-22 09:19:35	13005685CF10A	2013-04-19		1	(F3)	Deliver 3,4 Methylenediox	0									0					Risk of Recidivism	5	Medium	2013-04-20	Risk of Violence	4	Low	2013-04-20	2015-04-09	2015-05-29	0	2
252	matthew segal	matthew	segal	2013-04-20	Male	1984-08-30	31	25 - 45	Caucasian	0	5	0	0	0	0	2013-04-20 02:52:11	2013-04-22 09:19:35	13005685CF10A	2013-04-19		1	(F3)	Deliver 3,4 Methylenediox	0									0					Risk of Recidivism	5	Medium	2013-04-20	Risk of Violence	4	Low	2013-04-20	2015-04-09	2015-05-29	0	769
253	milton franklin	milton	franklin	2014-05-31	Male	1984-07-29	31	25 - 45	African-American	0	1	0	0	0	-1	2014-05-30 09:43:45	2014-05-31 09:38:59	14008657MM10A	2014-05-30		1	(M1)	Battery	0									0					Risk of Recidivism	1	Low	2014-05-31	Risk of Violence	2	Low	2014-05-31	2014-05-30	2014-05-31	0	0
254	deandre arnold	deandre	arnold	2013-09-17	Male	1990-09-19	25	25 - 45	African-American	0	2	0	0	1	-1	2013-09-16 03:35:39	2013-09-18 01:39:28	13017638MM10A	2013-09-16		1	(M1)	Battery	1	13019782MM10A	(M2)	0	2013-10-18	Prowling/Loitering	2013-10-18	2013-10-22		0					Risk of Recidivism	2	Low	2013-09-17	Risk of Violence	3	Low	2013-09-17	2013-10-18	2013-10-22	1	1
255	darance glass	darance	glass	2014-06-10	Male	1985-02-03	31	25 - 45	African-American	0	3	0	0	3	-19	2014-05-22 07:53:02	2014-06-10 10:33:59	14007173CF10A	2014-05-22		19	(F7)	Burglary Dwelling Armed	0									0					Risk of Recidivism	3	Low	2014-06-10	Risk of Violence	2	Low	2014-06-10	2014-05-22	2014-06-10	3	0
256	brittany cesar	brittany	cesar	2014-04-04	Female	1994-08-09	21	Less than 25	African-American	0	6	0	0	0	-4	2014-03-31 11:57:27	2014-04-04 11:07:49	14005507MM10A	2014-03-31		4	(M1)	Battery	0									0					Risk of Recidivism	6	Medium	2014-04-04	Risk of Violence	6	Medium	2014-04-04	2014-03-31	2014-04-04	0	0
257	robello rodriguez	robello	rodriguez	2013-09-09	Male	1992-09-11	23	Less than 25	Hispanic	0	3	0	0	0	-1	2013-09-08 01:03:31	2013-09-08 02:03:07	13012674CF10A	2013-09-07		2	(F3)	Poss3,4 Methylenedioxymethcath	0									0					Risk of Recidivism	3	Low	2013-09-09	Risk of Violence	5	Medium	2013-09-09	2013-09-08	2013-09-08	0	0
258	crissie wilson	crissie	wilson	2013-02-18	Female	1984-01-04	32	25 - 45	African-American	0	7	0	0	5	-1	2013-02-17 07:51:04	2013-02-18 10:17:02	13002448CF10A	2013-02-17		1	(F3)	Aggravated Assault W/dead Weap	0									0					Risk of Recidivism	7	Medium	2013-02-18	Risk of Violence	3	Low	2013-02-18	2013-02-17	2013-02-18	5	0
259	justo arias	justo	arias	2013-03-05	Male	1963-12-18	52	Greater than 45	Hispanic	0	1	0	0	2	-1	2013-03-04 10:07:00	2013-03-07 11:56:36	13018844TC10A	2013-03-04		1	(M2)	Leave Acc/Attend Veh/More $50	0									0					Risk of Recidivism	1	Low	2013-03-05	Risk of Violence	1	Low	2013-03-05	2013-06-21	2013-07-26	2	2
259	justo arias	justo	arias	2013-03-05	Male	1963-12-18	52	Greater than 45	Hispanic	0	1	0	0	2	-1	2013-03-04 10:07:00	2013-03-07 11:56:36	13018844TC10A	2013-03-04		1	(M2)	Leave Acc/Attend Veh/More $50	0									0					Risk of Recidivism	1	Low	2013-03-05	Risk of Violence	1	Low	2013-03-05	2013-06-21	2013-07-26	2	143
260	curtis ross	curtis	ross	2013-02-05	Male	1954-02-20	62	Greater than 45	African-American	0	4	0	0	8	0	2013-02-05 12:23:14	2013-02-21 04:06:55	13001749CF10A	2013-02-04		1	(F3)	Possession of Cocaine	0									0					Risk of Recidivism	4	Low	2013-02-05	Risk of Violence	1	Low	2013-02-05	2013-02-05	2013-02-21	8	16
261	jeffrey thornton	jeffrey	thornton	2014-04-09	Male	1985-12-14	30	25 - 45	African-American	0	6	0	0	2	-188	2013-10-03 07:25:28	2013-10-04 02:11:13	14005991MM10A	2014-04-08		1	(M1)	Battery	0									0					Risk of Recidivism	6	Medium	2014-04-09	Risk of Violence	4	Low	2014-04-09	2015-11-10	2015-11-16	2	0
261	jeffrey thornton	jeffrey	thornton	2014-04-09	Male	1985-12-14	30	25 - 45	African-American	0	6	0	0	2	-188	2013-10-03 07:25:28	2013-10-04 02:11:13	14005991MM10A	2014-04-08		1	(M1)	Battery	0									0					Risk of Recidivism	6	Medium	2014-04-09	Risk of Violence	4	Low	2014-04-09	2015-11-10	2015-11-16	2	586
262	melody ford	melody	ford	2013-04-22	Female	1978-08-09	37	25 - 45	Caucasian	0	10	0	0	6	-110	2013-01-02 12:30:44	2013-04-18 09:04:00	13000026CF10A	2013-01-01		111	(F3)	Possession of Cocaine	0									0					Risk of Recidivism	10	High	2013-04-22	Risk of Violence	4	Low	2013-04-22	2014-06-13	2014-12-18	6	0
262	melody ford	melody	ford	2013-04-22	Female	1978-08-09	37	25 - 45	Caucasian	0	10	0	0	6	-110	2013-01-02 12:30:44	2013-04-18 09:04:00	13000026CF10A	2013-01-01		111	(F3)	Possession of Cocaine	0									0					Risk of Recidivism	10	High	2013-04-22	Risk of Violence	4	Low	2013-04-22	2014-06-13	2014-12-18	6	605
263	michael loughran	michael	loughran	2013-09-10	Male	1960-08-29	55	Greater than 45	Caucasian	0	1	0	0	1	-45	2013-07-27 04:18:41	2013-08-14 12:12:39	13010542CF10A	2013-07-27		45	(F3)	Grand Theft in the 3rd Degree	0									0					Risk of Recidivism	1	Low	2013-09-10	Risk of Violence	1	Low	2013-09-10	2013-07-27	2013-08-14	1	0
264	alonso delcarpio	alonso	delcarpio	2013-07-25	Male	1984-10-28	31	25 - 45	Hispanic	0	9	0	0	8	29	2013-08-23 05:18:39	2013-12-18 10:43:00	12018752CF10A		2013-05-25	61	(F3)	arrest case no charge	1	14005411MM10A	(M1)	0	2014-03-29	Unlaw Use False Name/Identity	2014-03-29	2014-06-24		0					Risk of Recidivism	9	High	2013-07-25	Risk of Violence	7	Medium	2013-07-25	2013-08-23	2013-12-18	8	0
264	alonso delcarpio	alonso	delcarpio	2013-07-25	Male	1984-10-28	31	25 - 45	Hispanic	0	9	0	0	8	29	2013-08-23 05:18:39	2013-12-18 10:43:00	12018752CF10A		2013-05-25	61	(F3)	arrest case no charge	1	14005411MM10A	(M1)	0	2014-03-29	Unlaw Use False Name/Identity	2014-03-29	2014-06-24		0					Risk of Recidivism	9	High	2013-07-25	Risk of Violence	7	Medium	2013-07-25	2014-03-29	2014-06-24	8	146
265	darasan bispham	darasan	bispham	2013-03-18	Male	1987-05-19	28	25 - 45	African-American	0	6	0	0	6	-1	2013-03-17 09:01:58	2013-03-18 01:40:10	13005239MM10A	2013-03-17		1	(M1)	Resist/Obstruct W/O Violence	1	14060125TC30A	(M2)		2014-07-13	Fail Register Vehicle				1	15003512CF10A	(F2)	2015-03-15	Aggrav Battery w/Deadly Weapon	Risk of Recidivism	6	Medium	2013-03-18	Risk of Violence	6	Medium	2013-03-18	2016-03-01	2016-03-17	6	0
266	oscar lloranzo	oscar	lloranzo	2013-08-29	Male	1962-04-15	54	Greater than 45	Hispanic	0	1	0	0	2	-1	2013-08-28 02:23:37	2014-03-04 11:31:17	13012142CF10A	2013-08-28		1	(F2)	Burglary Unoccupied Dwelling	0									0					Risk of Recidivism	1	Low	2013-08-29	Risk of Violence	1	Low	2013-08-29	2013-08-28	2014-03-04	2	187
267	domingo martinez	domingo	martinez	2013-03-14	Male	1957-08-04	58	Greater than 45	Hispanic	0	2	0	0	0	-1	2013-03-13 10:02:13	2013-03-14 02:21:27	13003707CF10A	2013-03-13		1	(F3)	Possession Of Heroin	0									0					Risk of Recidivism	2	Low	2013-03-14	Risk of Violence	1	Low	2013-03-14	2014-01-10	2014-03-28	0	0
267	domingo martinez	domingo	martinez	2013-03-14	Male	1957-08-04	58	Greater than 45	Hispanic	0	2	0	0	0	-1	2013-03-13 10:02:13	2013-03-14 02:21:27	13003707CF10A	2013-03-13		1	(F3)	Possession Of Heroin	0									0					Risk of Recidivism	2	Low	2013-03-14	Risk of Violence	1	Low	2013-03-14	2014-01-10	2014-03-28	0	379
268	kwai lam	kwai	lam	2014-09-20	Male	1937-10-15	78	Greater than 45	Caucasian	0	1	0	0	1	-1	2014-09-19 10:36:52	2014-09-20 07:10:15	14034104MU10A	2014-09-19		1	(M1)	Driving Under The Influence	1	15009652CF10A	(F3)		2015-07-27	Leaving the Scene of Accident				0					Risk of Recidivism	1	Low	2014-09-20	Risk of Violence	1	Low	2014-09-20	2014-09-19	2014-09-20	1	0
269	marcial regidor	marcial	regidor	2014-03-03	Male	1959-12-31	56	Greater than 45	Caucasian	0	1	0	0	0	-1	2014-03-02 03:51:04	2014-03-03 07:47:20	14002945CF10A	2014-03-02		1	(F3)	Possession of Cocaine	0									0					Risk of Recidivism	1	Low	2014-03-03	Risk of Violence	1	Low	2014-03-03	2014-03-02	2014-03-03	0	0
270	manuel benitezhernandez	manuel	benitezhernandez	2014-06-27	Male	1995-01-11	21	Less than 25	Hispanic	0	10	0	0	1	-155	2014-01-23 03:33:01	2014-02-03 09:43:56	14001279MM10A	2014-01-23		155	(M1)	Possess Cannabis/20 Grams Or Less	0									0					Risk of Recidivism	10	High	2014-06-27	Risk of Violence	8	High	2014-06-27	2014-01-23	2014-02-03	1	0
271	shourav rahman	shourav	rahman	2014-01-14	Male	1992-01-07	24	Less than 25	Other	0	2	0	0	0	-1	2014-01-13 09:13:09	2014-01-15 08:37:12	14000576CF10A	2014-01-13		1	(F2)	Burglary Unoccupied Dwelling	0									0					Risk of Recidivism	2	Low	2014-01-14	Risk of Violence	4	Low	2014-01-14	2014-01-13	2014-01-15	0	1
272	dyer smith	dyer	smith	2014-09-09	Male	1977-10-06	38	25 - 45	African-American	2	8	2	1	22	-34	2014-08-06 12:10:51	2014-09-09 10:37:20	14010711CF10A	2014-08-05		35	(F3)	Child Abuse	1	15000813MM30A	(M1)	51	2015-05-05	Possess Cannabis/20 Grams Or Less	2015-06-25	2015-07-08		0					Risk of Recidivism	8	High	2014-09-09	Risk of Violence	5	Medium	2014-09-09	2015-09-09	2015-10-07	22	0
273	homer lewis	homer	lewis	2014-11-06	Male	1977-03-07	39	25 - 45	African-American	0	5	0	0	3	-1	2014-11-05 02:34:56	2014-11-10 08:50:37	10010985MO10A	2010-05-14		1637	(MO3)	Poss Of Controlled Substance	0									0					Risk of Recidivism	5	Medium	2014-11-06	Risk of Violence	1	Low	2014-11-06	2014-11-05	2014-11-10	3	4
274	robert penton	robert	penton	2014-04-29	Male	1980-12-07	35	25 - 45	Caucasian	0	1	0	0	0	-1	2014-04-28 11:04:53	2014-04-29 06:03:02	14005901CF10A	2014-04-28		1	(F3)	Possession of Cocaine	0									0					Risk of Recidivism	1	Low	2014-04-29	Risk of Violence	1	Low	2014-04-29	2014-04-28	2014-04-29	0	0
275	allen roundtree	allen	roundtree	2014-04-24	Male	1994-04-17	22	Less than 25	African-American	0	5	0	0	1	0	2014-04-24 01:23:50	2014-04-24 01:25:52	14005656CF10A	2014-04-23		1	(F3)	Pos Cannabis W/Intent Sel/Del	1	14084371TC20A	(M2)		2014-11-10	Operating W/O Valid License				0					Risk of Recidivism	5	Medium	2014-04-24	Risk of Violence	5	Medium	2014-04-24	2014-04-24	2014-04-24	1	0
277	douglas jones	douglas	jones	2013-02-03	Male	1968-05-13	47	Greater than 45	African-American	0	8	0	0	23	-1	2013-02-02 08:19:13	2013-02-03 05:06:15	13002407MM10A	2013-02-02		1	(M1)	Possess Cannabis/20 Grams Or Less	1	13002174CF10A	(F3)	0	2013-02-12	Grand Theft in the 3rd Degree	2013-02-12	2013-03-18		0					Risk of Recidivism	8	High	2013-02-03	Risk of Violence	1	Low	2013-02-03	2013-02-12	2013-03-18	23	0
278	colin jones	colin	jones	2014-01-06	Male	1992-08-30	23	Less than 25	African-American	0	2	0	0	0	-1	2014-01-05 11:08:48	2014-01-06 12:02:14	14000198MM10A	2014-01-05		1	(M1)	Battery	1	14010176MM10A	(M1)	0	2014-07-01	Extradition/Defendants	2014-07-01	2014-07-10		0					Risk of Recidivism	2	Low	2014-01-06	Risk of Violence	4	Low	2014-01-06	2014-07-01	2014-07-10	0	0
279	ronald castaneda	ronald	castaneda	2013-10-25	Male	1958-05-31	57	Greater than 45	Hispanic	0	1	0	0	1	0	2013-10-25 09:20:19	2013-11-14 02:05:31	13014942CF10A	2013-10-25		0	(F3)	Driving While License Revoked	0									0					Risk of Recidivism	1	Low	2013-10-25	Risk of Violence	1	Low	2013-10-25	2013-10-25	2013-11-14	1	20
280	valerie valletta	valerie	valletta	2013-07-10	Female	1977-06-30	38	25 - 45	Caucasian	0	5	0	0	2	-35	2013-06-05 06:36:18	2013-06-06 06:23:54	13007984CF10A	2013-06-05		35	(F3)	Possession of Cocaine	1	13023004MM10A	(M1)	0	2013-12-12	Unlaw Use False Name/Identity	2013-12-12	2013-12-20		0					Risk of Recidivism	5	Medium	2013-07-10	Risk of Violence	2	Low	2013-07-10	2013-12-12	2013-12-20	2	0
281	richard roberts	richard	roberts	2013-06-11	Male	1949-09-14	66	Greater than 45	African-American	0	1	0	0	3	-10	2013-06-01 11:04:44	2013-06-03 11:25:14	13007789CF10A	2013-06-01		10	(F2)	Agg Battery Grt/Bod/Harm	1	16000414MM20A	(M1)		2016-01-10	Battery				1	16000414MM20A	(M1)	2016-01-10	Battery	Risk of Recidivism	1	Low	2013-06-11	Risk of Violence	1	Low	2013-06-11	2013-06-01	2013-06-03	3	0
282	william malo	william	malo	2014-02-17	Male	1970-10-30	45	Greater than 45	Caucasian	0	4	0	0	8	0	2014-02-17 02:38:50	2014-04-29 04:18:29	14002730MM10A	2014-02-17		0	(M1)	Viol Injunct Domestic Violence	1	15011989MM10A	(M1)		2015-11-17	Viol Injunct Domestic Violence				0					Risk of Recidivism	4	Low	2014-02-17	Risk of Violence	3	Low	2014-02-17	2015-09-24	2015-10-05	8	71
282	william malo	william	malo	2014-02-17	Male	1970-10-30	45	Greater than 45	Caucasian	0	4	0	0	8	0	2014-02-17 02:38:50	2014-04-29 04:18:29	14002730MM10A	2014-02-17		0	(M1)	Viol Injunct Domestic Violence	1	15011989MM10A	(M1)		2015-11-17	Viol Injunct Domestic Violence				0					Risk of Recidivism	4	Low	2014-02-17	Risk of Violence	3	Low	2014-02-17	2015-09-24	2015-10-05	8	595
283	kristina seppi	kristina	seppi	2014-08-18	Female	1987-12-31	28	25 - 45	Caucasian	0	5	0	0	0	-2	2014-08-16 04:38:21	2014-08-17 08:35:28	14012376MM10A	2014-08-16		2	(M1)	Petit Theft $100- $300	0									0					Risk of Recidivism	5	Medium	2014-08-18	Risk of Violence	2	Low	2014-08-18	2014-08-16	2014-08-17	0	0
284	clynton branker	clynton	branker	2014-06-24	Male	1970-05-18	45	Greater than 45	Other	0	1	0	0	2	-117	2014-02-27 01:25:24	2014-02-28 04:26:31	14008339CF10A	2014-02-27		117	(F3)	Unlaw Fail Secur Work Comp Ins	0									0					Risk of Recidivism	1	Low	2014-06-24	Risk of Violence	1	Low	2014-06-24	2014-02-27	2014-02-28	2	0
285	charmaine ramkhelawan	charmaine	ramkhelawan	2013-07-22	Female	1964-04-16	52	Greater than 45	Other	0	3	0	0	0										1	14073509TC20A	(M2)		2014-10-14	Driving License Suspended				0					Risk of Recidivism	3	Low	2013-07-22	Risk of Violence	1	Low	2013-07-22			0	0
286	octavious gore	octavious	gore	2013-08-28	Male	1983-12-10	32	25 - 45	African-American	0	10	0	0	13	289	2014-06-13 03:07:06	2014-09-18 07:02:35	13012102CF10A	2013-08-27		1	(F2)	Poss Cocaine/Intent To Del/Sel	1	14008195CF10A	(F3)	0	2014-06-13	Possession of Cocaine	2014-06-13	2014-09-18		0					Risk of Recidivism	10	High	2013-08-28	Risk of Violence	7	Medium	2013-08-28	2014-06-13	2014-09-18	13	0
287	aaron eddins	aaron	eddins	2013-12-24	Male	1978-12-03	37	25 - 45	African-American	0	9	0	0	2	0	2013-12-24 03:40:12	2013-12-24 08:53:51	13023727MM10A	2013-12-24		0	(M1)	Battery	1	14005925MM10A	(M1)	0	2014-04-07	Battery	2014-04-07	2014-05-09		1	14005925MM10A	(M1)	2014-04-07	Battery	Risk of Recidivism	9	High	2013-12-24	Risk of Violence	8	High	2013-12-24	2014-04-07	2014-05-09	2	0
288	paolo mannino	paolo	mannino	2014-03-02	Male	1977-03-08	39	25 - 45	Caucasian	0	4	0	0	0	0	2014-03-02 05:08:46	2014-03-03 03:17:00	14002946CF10A	2014-03-02		0	(F3)	Possession Of Methamphetamine	1	15004071CF10A	(M1)	1	2015-03-26	Possess Drug Paraphernalia	2015-03-27	2015-05-07		0					Risk of Recidivism	4	Low	2014-03-02	Risk of Violence	4	Low	2014-03-02	2014-03-02	2014-03-03	0	1
289	tron clark	tron	clark	2014-11-14	Male	1990-01-15	26	25 - 45	African-American	0	9	0	0	9	0	2014-11-14 01:28:54	2015-02-01 08:34:27	14015288CF10A	2014-11-13		1	(F2)	Deliver Cocaine	1	15005911CF10A	(F3)	0	2015-05-06	Poss Pyrrolidinovalerophenone	2015-05-06	2015-08-20		0					Risk of Recidivism	9	High	2014-11-14	Risk of Violence	8	High	2014-11-14	2015-05-06	2015-08-20	9	79
290	leonard francis	leonard	francis	2014-05-03	Male	1990-06-04	25	25 - 45	African-American	0	8	0	0	3	-1	2014-05-02 09:18:09	2014-05-03 10:02:53	14003608CF10A		2014-05-03	0	(F3)	arrest case no charge	0									0					Risk of Recidivism	8	High	2014-05-03	Risk of Violence	8	High	2014-05-03	2014-05-02	2014-05-03	3	0
291	shad campbell	shad	campbell	2013-02-01	Male	1970-12-18	45	Greater than 45	Caucasian	0	3	0	0	2	-1	2013-01-31 04:11:55	2014-01-25 03:27:03	13001562CF10A	2013-01-31		1	(F3)	Lewd or Lascivious Molestation	0									0					Risk of Recidivism	3	Low	2013-02-01	Risk of Violence	4	Low	2013-02-01	2013-01-31	2014-01-25	2	358
292	irene allen	irene	allen	2014-05-31	Female	1959-03-16	57	Greater than 45	Caucasian	0	9	0	0	7	0	2014-05-31 02:37:54	2014-06-01 09:08:45	14007544CF10A	2014-05-31		0	(F3)	Possession of Cocaine	0									0					Risk of Recidivism	9	High	2014-05-31	Risk of Violence	1	Low	2014-05-31	2014-07-12	2014-08-15	7	1
292	irene allen	irene	allen	2014-05-31	Female	1959-03-16	57	Greater than 45	Caucasian	0	9	0	0	7	0	2014-05-31 02:37:54	2014-06-01 09:08:45	14007544CF10A	2014-05-31		0	(F3)	Possession of Cocaine	0									0					Risk of Recidivism	9	High	2014-05-31	Risk of Violence	1	Low	2014-05-31	2014-07-12	2014-08-15	7	76
293	delmario watt	delmario	watt	2014-04-26	Male	1992-12-18	23	Less than 25	African-American	0	3	0	0	0	-1	2014-04-25 10:29:59	2014-04-26 09:57:20	14005797CF10A	2014-04-25		1	(F3)	Possession of Cannabis	1	15003342CF10A	(F2)	0	2015-03-12	Robbery W/Firearm	2015-03-12	2015-09-21		1	15003342CF10A	(F2)	2015-03-12	Robbery W/Firearm	Risk of Recidivism	3	Low	2014-04-26	Risk of Violence	4	Low	2014-04-26	2015-03-12	2015-09-21	0	0
294	clifton mccree	clifton	mccree	2014-01-31	Male	1982-03-05	34	25 - 45	African-American	0	2	0	0	2	0	2014-01-31 12:35:27	2014-02-26 05:50:20	14001687MM10A	2014-01-30		1	(M1)	Battery	1	16002539CF10A	(F3)	0	2016-02-28		2016-02-28	2016-03-22		0					Risk of Recidivism	2	Low	2014-01-31	Risk of Violence	1	Low	2014-01-31	2016-02-28	2016-03-22	2	26
295	ramone brown	ramone	brown	2014-01-12	Male	1978-01-17	38	25 - 45	African-American	0	10	0	0	14	0	2014-01-12 12:14:58	2014-05-09 09:12:02	14000485CF10A	2014-01-11		1	(F3)	Possession of Oxycodone	0									0					Risk of Recidivism	10	High	2014-01-12	Risk of Violence	8	High	2014-01-12	2014-06-16	2014-07-24	14	117
295	ramone brown	ramone	brown	2014-01-12	Male	1978-01-17	38	25 - 45	African-American	0	10	0	0	14	0	2014-01-12 12:14:58	2014-05-09 09:12:02	14000485CF10A	2014-01-11		1	(F3)	Possession of Oxycodone	0									0					Risk of Recidivism	10	High	2014-01-12	Risk of Violence	8	High	2014-01-12	2014-08-22	2014-12-20	14	193
295	ramone brown	ramone	brown	2014-01-12	Male	1978-01-17	38	25 - 45	African-American	0	10	0	0	14	0	2014-01-12 12:14:58	2014-05-09 09:12:02	14000485CF10A	2014-01-11		1	(F3)	Possession of Oxycodone	0									0					Risk of Recidivism	10	High	2014-01-12	Risk of Violence	8	High	2014-01-12	2015-01-30	2015-03-24	14	342
295	ramone brown	ramone	brown	2014-01-12	Male	1978-01-17	38	25 - 45	African-American	0	10	0	0	14	0	2014-01-12 12:14:58	2014-05-09 09:12:02	14000485CF10A	2014-01-11		1	(F3)	Possession of Oxycodone	0									0					Risk of Recidivism	10	High	2014-01-12	Risk of Violence	8	High	2014-01-12	2015-03-24	2020-01-01	14	810
297	kerry gonzalez	kerry	gonzalez	2013-08-21	Female	1992-04-20	23	Less than 25	African-American	0	4	0	0	1	-1	2013-08-20 11:57:06	2013-08-21 07:50:16	13015960MM10A	2013-08-20		1	(M1)	Battery	0									0					Risk of Recidivism	4	Low	2013-08-21	Risk of Violence	4	Low	2013-08-21	2013-08-20	2013-08-21	1	0
298	cachaloni frank	cachaloni	frank	2014-01-28	Male	1979-10-14	36	25 - 45	Other	0	3	0	0	2	-1	2014-01-27 10:23:53	2014-01-30 10:04:48	14001518MM10A	2014-01-27		1	(M1)	Battery	1	15012142CF10A	(F2)	0	2015-09-18	Poss of Firearm by Convic Felo	2015-09-18	2015-12-04		0					Risk of Recidivism	3	Low	2014-01-28	Risk of Violence	1	Low	2014-01-28	2015-09-18	2015-12-04	2	2
299	douglas eaton	douglas	eaton	2013-09-16	Male	1965-05-28	50	Greater than 45	Caucasian	0	1	0	0	1	-4	2013-09-12 09:32:07	2013-09-14 03:06:18	16000586CF10A	2013-09-12		4	(F3)	Sexual Performance by a Child	0									0					Risk of Recidivism	1	Low	2013-09-16	Risk of Violence	1	Low	2013-09-16	2016-02-12	2016-02-13	1	0
299	douglas eaton	douglas	eaton	2013-09-16	Male	1965-05-28	50	Greater than 45	Caucasian	0	1	0	0	1	-4	2013-09-12 09:32:07	2013-09-14 03:06:18	16000586CF10A	2013-09-12		4	(F3)	Sexual Performance by a Child	0									0					Risk of Recidivism	1	Low	2013-09-16	Risk of Violence	1	Low	2013-09-16	2016-02-12	2016-02-13	1	880
300	stephanie harvey	stephanie	harvey	2013-11-08	Female	1978-08-31	37	25 - 45	Caucasian	0	3	0	0	0	-1	2013-11-07 02:53:47	2013-11-07 09:00:57	13021013MM10A	2013-11-07		1	(M2)	Leaving Acc/Unattended Veh	0									0					Risk of Recidivism	3	Low	2013-11-08	Risk of Violence	1	Low	2013-11-08	2013-11-07	2013-11-07	0	0
301	jason cypress	jason	cypress	2013-01-06	Male	1972-01-16	44	25 - 45	Caucasian	0	4	0	0	4	0	2013-01-06 04:51:37	2013-01-07 10:41:46	13000313MM10A	2013-01-06		0	(M1)	Battery	0									0					Risk of Recidivism	4	Low	2013-01-06	Risk of Violence	4	Low	2013-01-06	2013-01-06	2013-01-07	4	1
302	lakisha davis	lakisha	davis	2014-07-13	Female	1981-01-20	35	25 - 45	African-American	0	9	1	0	23	-1	2014-07-12 03:02:54	2014-07-14 05:19:00	14009552CF10A	2014-07-12		1	(F3)	Felony Petit Theft	1	15006897CF10A	(F3)		2015-05-27	Felony Petit Theft				0					Risk of Recidivism	9	High	2014-07-13	Risk of Violence	9	High	2014-07-13	2014-07-12	2014-07-14	23	1
303	alejandro trinidad	alejandro	trinidad	2014-10-21	Male	1984-09-02	31	25 - 45	Caucasian	0	1	0	0	1	-36	2014-09-15 02:11:34	2014-10-21 10:41:49	14012630CF10A		2014-09-15	36	(F1)	arrest case no charge	0									0					Risk of Recidivism	1	Low	2014-10-21	Risk of Violence	1	Low	2014-10-21	2014-09-15	2014-10-21	1	0
304	kerr mcbean	kerr	mcbean	2014-10-08	Male	1991-10-06	24	Less than 25	Other	0	5	0	0	5	-1	2014-10-07 12:01:33	2014-10-08 08:26:09	14012958CF10A		2014-10-07	1	(F3)	arrest case no charge	1	14016435CF10A	(F3)		2014-12-01	False Ownership Info/Pawn Item				0					Risk of Recidivism	5	Medium	2014-10-08	Risk of Violence	4	Low	2014-10-08	2014-10-07	2014-10-08	5	0
305	ammar kahok	ammar	kahok	2013-08-21	Male	1975-07-02	40	25 - 45	Asian	0	1	0	0	3	-108	2013-05-05 12:09:38	2013-08-20 08:41:45	13006416CF10A	2013-05-04		109	(F1)	Robbery W/Firearm	0									0					Risk of Recidivism	1	Low	2013-08-21	Risk of Violence	1	Low	2013-08-21	2015-03-12	2015-04-16	3	0
305	ammar kahok	ammar	kahok	2013-08-21	Male	1975-07-02	40	25 - 45	Asian	0	1	0	0	3	-108	2013-05-05 12:09:38	2013-08-20 08:41:45	13006416CF10A	2013-05-04		109	(F1)	Robbery W/Firearm	0									0					Risk of Recidivism	1	Low	2013-08-21	Risk of Violence	1	Low	2013-08-21	2015-04-16	2020-01-01	3	954
306	michael sexton	michael	sexton	2013-04-18	Male	1990-04-12	26	25 - 45	African-American	0	10	0	0	2	-1	2013-04-17 06:43:21	2013-04-18 10:07:23	13005483CF10A	2013-04-17		1	(F3)	Fleeing Or Attmp Eluding A Leo	1	14006182CF10A	(F3)	1	2014-05-02	Poss3,4 Methylenedioxymethcath	2014-05-03	2014-05-24		0					Risk of Recidivism	10	High	2013-04-18	Risk of Violence	8	High	2013-04-18	2015-08-18	2015-09-05	2	0
307	rishiraj job	rishiraj	job	2014-11-02	Male	1978-11-27	37	25 - 45	Other	0	6	0	0	1	-1	2014-11-01 02:13:06	2014-11-03 03:28:34	14014671CF10A	2014-10-31		2	(F3)	Felony DUI (level 3)	0									0					Risk of Recidivism	6	Medium	2014-11-02	Risk of Violence	2	Low	2014-11-02	2014-11-01	2014-11-03	1	1
308	adrean reid	adrean	reid	2013-03-26	Male	1988-08-11	27	25 - 45	African-American	0	2	0	0	0	-1	2013-03-25 12:25:41	2013-03-28 05:58:56	13004320CF10A	2013-03-25		1	(M1)	Criminal Mischief	0									0					Risk of Recidivism	2	Low	2013-03-26	Risk of Violence	3	Low	2013-03-26	2013-03-25	2013-03-28	0	2
309	helen barrero	helen	barrero	2014-08-17	Female	1984-06-16	31	25 - 45	Caucasian	0	3	0	0	1	-1	2014-08-16 07:30:11	2014-08-17 08:36:06	14012394MM10A	2014-08-16		1	(M1)	Battery	0									0					Risk of Recidivism	3	Low	2014-08-17	Risk of Violence	2	Low	2014-08-17	2014-08-16	2014-08-17	1	0
310	winnie nerestant	winnie	nerestant	2013-10-29	Female	1988-04-13	28	25 - 45	African-American	0	8	0	0	0	0	2013-10-29 04:01:57	2013-11-27 06:51:07	13015115CF10A	2013-10-28		1	(F2)	Aggrav Battery w/Deadly Weapon	0									0					Risk of Recidivism	8	High	2013-10-29	Risk of Violence	6	Medium	2013-10-29	2013-10-29	2013-11-27	0	29
311	frank gadman	frank	gadman	2013-03-26	Male	1973-01-27	43	25 - 45	Caucasian	0	5	0	0	11	49	2013-05-14 01:49:40	2013-09-12 07:19:52	12017664CF10A		2013-01-29	56	(F3)	arrest case no charge	1	13009339MM10A	(M1)	1	2013-05-13	Battery	2013-05-14	2013-09-12		1	13009339MM10A	(M1)	2013-05-13	Battery	Risk of Recidivism	5	Medium	2013-03-26	Risk of Violence	3	Low	2013-03-26	2013-09-12	2014-10-01	11	0
313	briteny williams	briteny	williams	2013-10-10	Female	1988-01-12	28	25 - 45	Caucasian	0	9	0	0	7	-1	2013-10-09 09:15:07	2013-10-10 09:46:20	13014154CF10A	2013-10-09		1	(F3)	Felony Petit Theft	1	14015569CF10A	(F3)		2014-05-14	Grand Theft in the 3rd Degree				0					Risk of Recidivism	9	High	2013-10-10	Risk of Violence	6	Medium	2013-10-10	2015-11-19	2020-01-01	7	0
314	james gaboton	james	gaboton	2014-05-21	Male	1978-01-29	38	25 - 45	African-American	0	1	0	0	0	0	2014-05-21 03:04:42	2014-05-21 08:26:34	14007076CF10A	2014-05-20		1	(F3)	Driving While License Revoked	0									0					Risk of Recidivism	1	Low	2014-05-21	Risk of Violence	1	Low	2014-05-21	2014-05-21	2014-05-21	0	0
315	damond craig	damond	craig	2013-03-20	Male	1977-06-11	38	25 - 45	African-American	0	1	0	0	2	-1	2013-03-19 04:21:06	2013-03-20 09:34:48	13004002CF10A	2013-03-19		1	(F3)	Driving While License Revoked	0									0					Risk of Recidivism	1	Low	2013-03-20	Risk of Violence	1	Low	2013-03-20	2013-05-20	2013-05-20	2	0
315	damond craig	damond	craig	2013-03-20	Male	1977-06-11	38	25 - 45	African-American	0	1	0	0	2	-1	2013-03-19 04:21:06	2013-03-20 09:34:48	13004002CF10A	2013-03-19		1	(F3)	Driving While License Revoked	0									0					Risk of Recidivism	1	Low	2013-03-20	Risk of Violence	1	Low	2013-03-20	2013-05-20	2013-05-20	2	61
316	justin castellanos	justin	castellanos	2014-02-26	Male	1989-03-16	27	25 - 45	Caucasian	0	4	0	0	2	-36	2014-01-21 10:31:38	2014-02-26 10:40:06	14000870CF10A	2014-01-21		36	(M2)	Trespass Struct/Conveyance	0									0					Risk of Recidivism	4	Low	2014-02-26	Risk of Violence	3	Low	2014-02-26	2014-01-21	2014-02-26	2	0
317	jenay doe	jenay	doe	2013-01-02	Female	1987-10-07	28	25 - 45	African-American	0	9	0	0	1	-1	2013-01-01 06:27:15	2013-02-09 02:24:08	13000032CF10A		2013-01-01	1	(F1)	arrest case no charge	0									0					Risk of Recidivism	9	High	2013-01-02	Risk of Violence	7	Medium	2013-01-02	2015-06-10	2015-08-28	1	38
317	jenay doe	jenay	doe	2013-01-02	Female	1987-10-07	28	25 - 45	African-American	0	9	0	0	1	-1	2013-01-01 06:27:15	2013-02-09 02:24:08	13000032CF10A		2013-01-01	1	(F1)	arrest case no charge	0									0					Risk of Recidivism	9	High	2013-01-02	Risk of Violence	7	Medium	2013-01-02	2015-06-10	2015-08-28	1	968
318	tupac fairclough	tupac	fairclough	2013-01-18	Male	1994-12-07	21	Less than 25	African-American	1	7	0	0	1	-1	2013-01-17 11:25:29	2013-01-20 04:03:54	13000836CF10A	2013-01-17		1	(F3)	Grand Theft in the 3rd Degree	0									0					Risk of Recidivism	7	Medium	2013-01-18	Risk of Violence	8	High	2013-01-18	2013-04-11	2014-02-25	1	2
318	tupac fairclough	tupac	fairclough	2013-01-18	Male	1994-12-07	21	Less than 25	African-American	1	7	0	0	1	-1	2013-01-17 11:25:29	2013-01-20 04:03:54	13000836CF10A	2013-01-17		1	(F3)	Grand Theft in the 3rd Degree	0									0					Risk of Recidivism	7	Medium	2013-01-18	Risk of Violence	8	High	2013-01-18	2014-12-09	2015-09-21	1	1077
318	tupac fairclough	tupac	fairclough	2013-01-18	Male	1994-12-07	21	Less than 25	African-American	1	7	0	0	1	-1	2013-01-17 11:25:29	2013-01-20 04:03:54	13000836CF10A	2013-01-17		1	(F3)	Grand Theft in the 3rd Degree	0									0					Risk of Recidivism	7	Medium	2013-01-18	Risk of Violence	8	High	2013-01-18	2014-12-09	2015-09-21	1	976
319	henry nesbitt	henry	nesbitt	2013-03-20	Male	1959-12-26	56	Greater than 45	Caucasian	0	1	0	0	7	-1	2013-03-19 11:00:49	2013-03-20 01:32:28	13003999CF10A	2013-03-19		1	(F3)	Felony Driving While Lic Suspd	1	14003046TC10A	(M2)		2013-11-20	Driving License Suspended				0					Risk of Recidivism	1	Low	2013-03-20	Risk of Violence	1	Low	2013-03-20	2013-03-19	2013-03-20	7	0
320	andreas fountain	andreas	fountain	2013-02-19	Male	1977-08-08	38	25 - 45	African-American	0	9	0	0	15	-1	2013-02-18 09:26:05	2013-02-20 03:43:56	13002469CF10A	2013-02-18		1	(F3)	Possession of Cocaine	0									0					Risk of Recidivism	9	High	2013-02-19	Risk of Violence	3	Low	2013-02-19	2013-02-18	2013-02-20	15	1
321	joshua edmond	joshua	edmond	2013-10-31	Male	1987-10-28	28	25 - 45	African-American	0	5	0	0	2	-1	2013-10-30 07:57:19	2013-10-31 01:45:23	07028509MM10A	2007-12-15		2147	(M1)	Possess Cannabis/20 Grams Or Less	0									0					Risk of Recidivism	5	Medium	2013-10-31	Risk of Violence	4	Low	2013-10-31	2013-10-30	2013-10-31	2	0
322	clinton johnson	clinton	johnson	2013-01-10	Male	1971-02-08	45	Greater than 45	African-American	0	6	0	0	3	104	2013-04-24 12:56:21	2013-11-29 03:06:21	12016802CF10A		2012-12-18	23	(F3)	arrest case no charge	0									0					Risk of Recidivism	6	Medium	2013-01-10	Risk of Violence	4	Low	2013-01-10	2013-04-24	2013-11-29	3	0
322	clinton johnson	clinton	johnson	2013-01-10	Male	1971-02-08	45	Greater than 45	African-American	0	6	0	0	3	104	2013-04-24 12:56:21	2013-11-29 03:06:21	12016802CF10A		2012-12-18	23	(F3)	arrest case no charge	0									0					Risk of Recidivism	6	Medium	2013-01-10	Risk of Violence	4	Low	2013-01-10	2013-04-24	2013-11-29	3	323
323	williams rodriguez	williams	rodriguez	2013-01-04	Male	1987-06-14	28	25 - 45	Hispanic	0	2	0	0	0				12026489MM10A	2012-12-30		5	(M1)	DUI Property Damage/Injury	0									0					Risk of Recidivism	2	Low	2013-01-04	Risk of Violence	3	Low	2013-01-04			0	0
324	deandra clarke	deandra	clarke	2014-04-22	Female	1991-07-15	24	Less than 25	Other	0	2	0	0	1	-1	2014-04-21 09:47:47	2014-04-22 10:18:19	14005544CF10A		2014-04-21	1	(F3)	arrest case no charge	0									0					Risk of Recidivism	2	Low	2014-04-22	Risk of Violence	2	Low	2014-04-22	2014-04-21	2014-04-22	1	0
325	jon fried	jon	fried	2013-03-20	Male	1954-10-19	61	Greater than 45	Caucasian	0	1	0	0	1	-34	2013-02-14 11:17:01	2013-02-15 07:40:39	13002308CF10A		2013-02-14	34	(F3)	arrest case no charge	0									0					Risk of Recidivism	1	Low	2013-03-20	Risk of Violence	1	Low	2013-03-20	2013-02-14	2013-02-15	1	0
326	tamara powers	tamara	powers	2014-01-13	Female	1964-12-08	51	Greater than 45	Caucasian	0	1	0	0	0	-1	2014-01-12 08:37:58	2014-01-13 02:00:36	14001458MU10A	2014-01-12		1	(M1)	Driving Under The Influence	1	14010147MM10A	(M1)	0	2014-07-01	Battery	2014-07-01	2014-09-06		1	14010147MM10A	(M1)	2014-07-01	Battery	Risk of Recidivism	1	Low	2014-01-13	Risk of Violence	1	Low	2014-01-13	2014-07-01	2014-09-06	0	0
327	matthew dukes	matthew	dukes	2013-10-31	Male	1965-01-27	51	Greater than 45	Caucasian	0	2	0	0	0	-1	2013-10-30 11:27:14	2013-10-31 08:46:16	13020585MM10A	2013-10-30		1	(M1)	Battery	0									0					Risk of Recidivism	2	Low	2013-10-31	Risk of Violence	2	Low	2013-10-31	2013-10-30	2013-10-31	0	0
328	unnar thorbjornsson	unnar	thorbjornsson	2014-05-13	Male	1995-11-25	20	Less than 25	Caucasian	0	4	0	1	0	0	2014-05-13 01:11:43	2014-05-13 01:51:03	14006615CF10A	2014-05-12		1	(F3)	Poss Similitude of Drivers Lic	0									0					Risk of Recidivism	4	Low	2014-05-13	Risk of Violence	7	Medium	2014-05-13	2014-05-13	2014-05-13	0	0
329	keron edwards	keron	edwards	2013-01-07	Male	1979-05-18	36	25 - 45	Other	0	1	0	0	1	-1	2013-01-06 09:15:11	2013-01-07 11:01:40	13000317MM10A	2013-01-06		1	(M1)	Possess Cannabis/20 Grams Or Less	1	13036282TC10A	(M2)	0	2013-08-24	Driving License Suspended	2013-08-24	2013-08-24		0					Risk of Recidivism	1	Low	2013-01-07	Risk of Violence	1	Low	2013-01-07	2013-08-24	2013-08-24	1	0
329	keron edwards	keron	edwards	2013-01-07	Male	1979-05-18	36	25 - 45	Other	0	1	0	0	1	-1	2013-01-06 09:15:11	2013-01-07 11:01:40	13000317MM10A	2013-01-06		1	(M1)	Possess Cannabis/20 Grams Or Less	1	13036282TC10A	(M2)	0	2013-08-24	Driving License Suspended	2013-08-24	2013-08-24		0					Risk of Recidivism	1	Low	2013-01-07	Risk of Violence	1	Low	2013-01-07	2013-08-24	2013-08-24	1	229
330	henson thomas	henson	thomas	2013-01-13	Male	1967-08-06	48	Greater than 45	African-American	0	1	0	0	0	-1	2013-01-12 06:40:25	2013-01-13 09:03:52	13000573CF10A	2013-01-12		1	(F3)	Aggravated Battery (Firearm/Actual Possession)	0									0					Risk of Recidivism	1	Low	2013-01-13	Risk of Violence	1	Low	2013-01-13	2013-01-12	2013-01-13	0	0
331	shawn rheal	shawn	rheal	2013-04-17	Male	1978-08-07	37	25 - 45	Caucasian	0	3	0	0	4	0	2013-04-17 04:44:25	2013-04-19 01:08:53	13003798CF10A		2013-04-17	0	(F3)	arrest case no charge	1	14003906MM40A	(M2)	3	2014-09-15	Petit Theft	2014-09-18	2014-10-09		0					Risk of Recidivism	3	Low	2013-04-17	Risk of Violence	4	Low	2013-04-17	2013-04-17	2013-04-19	4	2
332	jessica charnel	jessica	charnel	2013-05-13	Female	1985-07-17	30	25 - 45	African-American	0	7	0	0	2	-1	2013-05-12 06:56:40	2013-05-15 02:06:25	13006795CF10A	2013-05-12		1	(F3)	Grand Theft in the 3rd Degree	0									0					Risk of Recidivism	7	Medium	2013-05-13	Risk of Violence	4	Low	2013-05-13	2013-05-12	2013-05-15	2	2
333	tumeka warner	tumeka	warner	2013-11-05	Female	1974-04-25	41	25 - 45	African-American	0	6	0	0	5	0	2013-11-05 02:09:51	2013-11-05 07:57:55	13020890MM10A	2013-11-04		1	(M1)	Battery	0									0					Risk of Recidivism	6	Medium	2013-11-05	Risk of Violence	3	Low	2013-11-05	2013-11-05	2013-11-05	5	0
334	jerry cheristil	jerry	cheristil	2013-04-24	Male	1988-09-24	27	25 - 45	African-American	0	10	0	0	11	-1	2013-04-23 07:22:20	2013-12-02 11:28:01	13005813CF10A	2013-04-23		1	(F2)	Robbery / No Weapon	1	14010056CF10A	(F3)		2014-07-01	Crim Use of Personal ID Info				0					Risk of Recidivism	10	High	2013-04-24	Risk of Violence	9	High	2013-04-24	2013-04-23	2013-12-02	11	222
335	kip stubbs	kip	stubbs	2013-02-17	Male	1979-04-03	37	25 - 45	African-American	0	1	0	0	0	-1	2013-02-16 07:22:50	2013-02-18 02:10:02	13003388MM10A	2013-02-16		1	(M1)	Battery	1	15007263MM10A	(M1)	0	2015-07-07	Battery	2015-07-07	2015-07-20		1	15007263MM10A	(M1)	2015-07-07	Battery	Risk of Recidivism	1	Low	2013-02-17	Risk of Violence	1	Low	2013-02-17	2015-07-07	2015-07-20	0	1
336	kerlon coomansingh	kerlon	coomansingh	2014-04-30	Male	1983-02-01	33	25 - 45	Other	0	4	0	0	4	0	2014-04-30 02:37:51	2014-05-02 05:55:00	14006015CF10A	2014-04-29		1	(F3)	Aggravated Assault w/Firearm	1	15000829MM20A	(M1)		2015-03-10	Possess Cannabis/20 Grams Or Less				0					Risk of Recidivism	4	Low	2014-04-30	Risk of Violence	2	Low	2014-04-30	2014-04-30	2014-05-02	4	2
337	shawn siler	shawn	siler	2013-05-07	Male	1961-08-23	54	Greater than 45	African-American	0	9	0	0	11	-1	2013-05-06 08:51:14	2013-09-13 05:58:39	13006472CF10A	2013-05-06		1	(F3)	Grand Theft (Motor Vehicle)	0									0					Risk of Recidivism	9	High	2013-05-07	Risk of Violence	9	High	2013-05-07	2013-05-06	2013-09-13	11	129
338	kriston douglas	kriston	douglas	2013-05-09	Male	1992-08-26	23	Less than 25	African-American	0	9	0	0	2	-1	2013-05-08 10:09:34	2013-07-19 06:36:57	13006694CF10A	2013-05-08		1	(F1)	Robbery / Weapon	0									0					Risk of Recidivism	9	High	2013-05-09	Risk of Violence	5	Medium	2013-05-09	2013-05-08	2013-07-19	2	71
339	tahir turner	tahir	turner	2014-12-25	Male	1994-02-10	22	Less than 25	African-American	0	6	0	0	0	-1	2014-12-24 06:05:13	2014-12-26 02:09:35	14017013CF10A		2014-12-24	1	(F3)	arrest case no charge	0									0					Risk of Recidivism	6	Medium	2014-12-25	Risk of Violence	5	Medium	2014-12-25	2014-12-24	2014-12-26	0	1
341	allana jones	allana	jones	2014-07-29	Female	1990-03-15	26	25 - 45	African-American	0	4	0	0	2	-227	2013-12-14 11:19:35	2014-07-29 11:06:26	13017291CF10A		2013-12-14	227	(F7)	arrest case no charge	1	15033947TC30A	(M2)		2015-05-08	Operating W/O Valid License				0					Risk of Recidivism	4	Low	2014-07-29	Risk of Violence	6	Medium	2014-07-29	2013-12-14	2014-07-29	2	0
342	tanisha brewton	tanisha	brewton	2014-05-26	Female	1992-04-28	23	Less than 25	African-American	0	6	2	0	3	0	2014-05-26 01:27:36	2014-05-27 08:47:44	14007298CF10A	2014-05-25		1	(F3)	Aggravated Assault W/Dead Weap	0									0					Risk of Recidivism	6	Medium	2014-05-26	Risk of Violence	6	Medium	2014-05-26	2015-11-03	2015-11-03	3	1
342	tanisha brewton	tanisha	brewton	2014-05-26	Female	1992-04-28	23	Less than 25	African-American	0	6	2	0	3	0	2014-05-26 01:27:36	2014-05-27 08:47:44	14007298CF10A	2014-05-25		1	(F3)	Aggravated Assault W/Dead Weap	0									0					Risk of Recidivism	6	Medium	2014-05-26	Risk of Violence	6	Medium	2014-05-26	2015-11-03	2015-11-03	3	526
344	tania quinonez	tania	quinonez	2014-01-25	Male	1974-08-07	41	25 - 45	African-American	0	1	0	0	0	0	2014-01-25 09:44:01	2014-01-26 06:31:19	14001403MM10A	2014-01-25		0	(M1)	Battery	0									0					Risk of Recidivism	1	Low	2014-01-25	Risk of Violence	1	Low	2014-01-25	2014-01-25	2014-01-26	0	1
345	edward connell	edward	connell	2013-05-16	Male	1964-02-10	52	Greater than 45	Caucasian	0	1	0	0	0	-1	2013-05-15 11:15:03	2013-05-16 08:50:44	13006960CF10A	2013-05-15		1	(F3)	Burglary With Assault/battery	0									0					Risk of Recidivism	1	Low	2013-05-16	Risk of Violence	1	Low	2013-05-16	2013-05-15	2013-05-16	0	0
347	eric avery	eric	avery	2013-02-20	Male	1972-06-07	43	25 - 45	Caucasian	0	4	0	0	13	0	2013-02-20 01:55:05	2013-04-12 09:45:26	13002509CF10A	2013-02-19		1	(F3)	Driving While License Revoked	1	13010684CF10A	(F3)	0	2013-07-31	Possession Of Heroin	2013-07-31	2014-03-18		0					Risk of Recidivism	4	Low	2013-02-20	Risk of Violence	1	Low	2013-02-20	2013-07-31	2014-03-18	13	51
348	robert dukes	robert	dukes	2014-02-04	Male	1964-02-12	52	Greater than 45	African-American	0	4	0	0	0	-1	2014-02-03 03:50:35	2014-02-17 02:20:23	14001502CF10A	2014-02-03		1	(F3)	Uttering a Forged Instrument	0									0					Risk of Recidivism	4	Low	2014-02-04	Risk of Violence	3	Low	2014-02-04	2014-02-03	2014-02-17	0	13
349	michael cunningham	michael	cunningham	2013-05-17	Male	1987-07-21	28	25 - 45	Caucasian	0	1	0	0	1	-3	2013-05-14 04:20:05	2013-05-17 10:53:34	09011413CF10A		2013-05-14	3	(F3)	arrest case no charge	0									0					Risk of Recidivism	1	Low	2013-05-17	Risk of Violence	2	Low	2013-05-17	2013-05-14	2013-05-17	1	0
350	willie sims	willie	sims	2014-08-06	Male	1985-10-26	30	25 - 45	African-American	0	9	0	2	11	-1	2014-08-05 03:19:41	2014-08-06 08:40:28	14011853MM10A	2014-08-05		1	(M1)	Battery	1	14017107MM10A	(M1)	0	2014-12-03	Trespass After Warning	2014-12-03	2014-12-09		1	15000025CF10A	(F1)	2014-12-20	Robbery W/Firearm	Risk of Recidivism	9	High	2014-08-06	Risk of Violence	4	Low	2014-08-06	2014-12-03	2014-12-09	11	0
351	bret petit	bret	petit	2013-09-27	Male	1987-05-13	28	25 - 45	Caucasian	0	5	0	0	1	0	2013-09-27 04:35:20	2013-10-03 08:39:37	13013598CF10A	2013-09-27		0	(F3)	Criminal Mischief	0									0					Risk of Recidivism	5	Medium	2013-09-27	Risk of Violence	3	Low	2013-09-27	2013-09-27	2013-10-03	1	6
352	joseph kozma	joseph	kozma	2014-10-16	Male	1968-09-08	47	Greater than 45	Caucasian	0	2	0	0	1	-38	2014-09-08 04:11:42	2014-10-16 01:22:43	07023884CF10A		2014-09-08	38	(F2)	arrest case no charge	0									0					Risk of Recidivism	2	Low	2014-10-16	Risk of Violence	3	Low	2014-10-16	2014-09-08	2014-10-16	1	0
353	patrice johnson	patrice	johnson	2014-09-28	Female	1981-08-10	34	25 - 45	African-American	0	2	0	0	0	-1	2014-09-27 12:37:01	2014-09-28 12:26:27	14014276MM10A	2014-09-27		1	(M1)	Battery	0									0					Risk of Recidivism	2	Low	2014-09-28	Risk of Violence	1	Low	2014-09-28	2014-09-27	2014-09-28	0	0
354	william st fleur	william	st fleur	2013-02-22	Male	1993-09-29	22	Less than 25	African-American	0	4	0	0	0	-1	2013-02-21 03:42:13	2013-02-22 01:52:11	13002685CF10A	2013-02-21		1	(F3)	Pos Cannabis W/Intent Sel/Del	0									0					Risk of Recidivism	4	Low	2013-02-22	Risk of Violence	6	Medium	2013-02-22	2013-02-21	2013-02-22	0	0
355	gylier lewis	gylier	lewis	2013-03-05	Male	1985-05-18	30	25 - 45	African-American	0	2	0	0	4	0	2013-03-05 04:44:39	2013-03-05 01:41:22	13003312CF10A	2013-03-05		0	(F3)	Driving While License Revoked	0									0					Risk of Recidivism	2	Low	2013-03-05	Risk of Violence	2	Low	2013-03-05	2013-03-05	2013-03-05	4	0
356	giovanni potesta	giovanni	potesta	2013-11-03	Male	1990-06-29	25	25 - 45	Hispanic	0	4	0	0	4	0	2013-11-03 02:47:28	2013-11-04 07:59:32	13015319CF10A	2013-11-03		0	(F3)	Possession of Cannabis	0									0					Risk of Recidivism	4	Low	2013-11-03	Risk of Violence	4	Low	2013-11-03	2013-11-03	2013-11-04	4	1
357	krishna sookram	krishna	sookram	2014-12-31	Male	1984-08-15	31	25 - 45	Caucasian	0	8	0	0	0	-1	2014-12-30 04:53:40	2015-01-30 04:31:37	14017187CF10A	2014-12-30		1	(F2)	Burglary Unoccupied Dwelling	1	16001829CF10A	(F2)	0	2016-02-05	Wear Mask w/Commit Offense	2016-02-05	2016-03-18		0					Risk of Recidivism	8	High	2014-12-31	Risk of Violence	5	Medium	2014-12-31	2016-02-05	2016-03-18	0	30
358	kelly payne	kelly	payne	2014-04-19	Male	1978-07-23	37	25 - 45	Caucasian	0	2	0	0	0	-1	2014-04-18 05:22:38	2014-05-23 05:31:44	14005430CF10A	2014-04-18		1	(F3)	Grand Theft in the 3rd Degree	1	15000286MM20A	(M1)		2014-12-27	Petit Theft $100- $300				0					Risk of Recidivism	2	Low	2014-04-19	Risk of Violence	1	Low	2014-04-19	2014-10-08	2014-10-26	0	34
358	kelly payne	kelly	payne	2014-04-19	Male	1978-07-23	37	25 - 45	Caucasian	0	2	0	0	0	-1	2014-04-18 05:22:38	2014-05-23 05:31:44	14005430CF10A	2014-04-18		1	(F3)	Grand Theft in the 3rd Degree	1	15000286MM20A	(M1)		2014-12-27	Petit Theft $100- $300				0					Risk of Recidivism	2	Low	2014-04-19	Risk of Violence	1	Low	2014-04-19	2014-10-08	2014-10-26	0	190
359	gerald magnus	gerald	magnus	2013-12-17	Male	1983-05-20	32	25 - 45	African-American	0	9	1	0	14	-1	2013-12-16 05:05:35	2013-12-17 08:47:25	13017383CF10A	2013-12-16		1	(F2)	Aggravated Battery / Pregnant	0									0					Risk of Recidivism	9	High	2013-12-17	Risk of Violence	8	High	2013-12-17	2013-12-16	2013-12-17	14	0
360	devonn singletary	devonn	singletary	2013-09-11	Male	1989-08-21	26	25 - 45	African-American	0	8	1	0	4	649	2015-06-22 09:31:25	2015-09-06 07:25:45	09001823MM30A	2009-06-02		1562	(M1)	Possess Cannabis/20 Grams Or Less	0									0					Risk of Recidivism	8	High	2013-09-11	Risk of Violence	6	Medium	2013-09-11	2015-06-22	2015-09-06	4	0
360	devonn singletary	devonn	singletary	2013-09-11	Male	1989-08-21	26	25 - 45	African-American	0	8	1	0	4	649	2015-06-22 09:31:25	2015-09-06 07:25:45	09001823MM30A	2009-06-02		1562	(M1)	Possess Cannabis/20 Grams Or Less	0									0					Risk of Recidivism	8	High	2013-09-11	Risk of Violence	6	Medium	2013-09-11	2015-10-07	2015-10-08	4	725
360	devonn singletary	devonn	singletary	2013-09-11	Male	1989-08-21	26	25 - 45	African-American	0	8	1	0	4	649	2015-06-22 09:31:25	2015-09-06 07:25:45	09001823MM30A	2009-06-02		1562	(M1)	Possess Cannabis/20 Grams Or Less	0									0					Risk of Recidivism	8	High	2013-09-11	Risk of Violence	6	Medium	2013-09-11	2015-10-07	2015-10-08	4	757
361	michael gellert	michael	gellert	2013-01-16	Male	1962-11-03	53	Greater than 45	Caucasian	0	1	0	0	1	-1	2013-01-15 05:53:17	2013-01-16 07:01:06	13001030MM10A	2013-01-15		1	(M1)	Battery	0									0					Risk of Recidivism	1	Low	2013-01-16	Risk of Violence	1	Low	2013-01-16	2013-01-15	2013-01-16	1	0
362	tyvon elisias	tyvon	elisias	2013-12-10	Male	1988-03-12	28	25 - 45	African-American	0	8	0	0	25	29	2014-01-08 11:38:20	2014-02-03 10:50:45	13013857CF10A		2013-10-01	70	(F3)	arrest case no charge	1	14004583CF10A	(F3)		2014-03-15	Burglary Structure Unoccup				0					Risk of Recidivism	8	High	2013-12-10	Risk of Violence	9	High	2013-12-10	2014-01-08	2014-02-03	25	0
362	tyvon elisias	tyvon	elisias	2013-12-10	Male	1988-03-12	28	25 - 45	African-American	0	8	0	0	25	29	2014-01-08 11:38:20	2014-02-03 10:50:45	13013857CF10A		2013-10-01	70	(F3)	arrest case no charge	1	14004583CF10A	(F3)		2014-03-15	Burglary Structure Unoccup				0					Risk of Recidivism	8	High	2013-12-10	Risk of Violence	9	High	2013-12-10	2014-01-08	2014-02-03	25	55
363	earl booth	earl	booth	2013-04-11	Male	1971-10-16	44	25 - 45	Caucasian	0	5	0	0	8	-1	2013-04-10 09:31:05	2013-04-15 09:09:29	13006980MM10A	2013-04-10		1	(M1)	Battery	1	13003502MM40A	(M1)	294	2013-08-25	Resist/Obstruct W/O Violence	2014-06-15	2014-06-16		0					Risk of Recidivism	5	Medium	2013-04-11	Risk of Violence	3	Low	2013-04-11	2013-04-10	2013-04-15	8	4
364	jose louis	jose	louis	2013-09-06	Male	1990-09-08	25	25 - 45	African-American	0	3	0	0	0	0	2013-09-06 01:00:30	2013-09-06 09:12:00	13012559CF10A	2013-09-05		1	(F3)	Grand Theft in the 3rd Degree	0									0					Risk of Recidivism	3	Low	2013-09-06	Risk of Violence	4	Low	2013-09-06	2013-09-06	2013-09-06	0	0
365	molaine charles	molaine	charles	2014-10-02	Female	1986-01-03	30	25 - 45	Other	0	1	0	0	0	-1	2014-10-01 12:29:33	2014-10-02 08:15:49	14014458MM10A	2014-10-01		1	(M1)	Battery	0									0					Risk of Recidivism	1	Low	2014-10-02	Risk of Violence	1	Low	2014-10-02	2014-10-01	2014-10-02	0	0
366	luis velasco	luis	velasco	2013-01-31	Male	1994-04-16	22	Less than 25	Caucasian	0	8	0	1	1	0	2013-01-31 12:38:45	2013-02-06 11:18:24	13002163MM10A	2013-01-31		0	(M1)	Voyeurism	1	14009724CF10A	(F3)	0	2014-07-16	Grand Theft in the 3rd Degree	2014-07-16	2014-07-23		0					Risk of Recidivism	8	High	2013-01-31	Risk of Violence	7	Medium	2013-01-31	2014-07-16	2014-07-23	1	6
367	nicole cooper	nicole	cooper	2014-05-13	Female	1986-03-14	30	25 - 45	African-American	1	8	0	0	2	-153	2013-12-11 02:35:00	2014-04-01 11:12:09	13017117CF10A		2013-12-11	153	(F2)	arrest case no charge	0									0					Risk of Recidivism	8	High	2014-05-13	Risk of Violence	8	High	2014-05-13	2013-12-11	2014-04-01	2	0
368	ericka spells	ericka	spells	2014-11-23	Female	1995-10-01	20	Less than 25	African-American	0	5	0	0	0	-1	2014-11-22 06:09:30	2014-11-23 12:35:11	14015751CF10A	2014-11-22		1	(F3)	Grand Theft in the 3rd Degree	0									0					Risk of Recidivism	5	Medium	2014-11-23	Risk of Violence	6	Medium	2014-11-23	2014-11-22	2014-11-23	0	0
369	patria barnes	patria	barnes	2013-12-09	Female	1978-06-06	37	25 - 45	Other	0	1	0	0	0	-1	2013-12-08 01:55:28	2013-12-09 02:00:59	13022717MM10A	2013-12-07		2	(M1)	Battery	0									0					Risk of Recidivism	1	Low	2013-12-09	Risk of Violence	1	Low	2013-12-09	2013-12-08	2013-12-09	0	0
370	jamie hoffmann	jamie	hoffmann	2014-11-03	Female	1982-11-12	33	25 - 45	Caucasian	0	2	0	0	0	-1	2014-11-02 01:50:39	2014-11-03 01:52:19	14014717CF10A	2014-11-02		1	(F3)	Poss Contr Subst W/o Prescript	0									0					Risk of Recidivism	2	Low	2014-11-03	Risk of Violence	1	Low	2014-11-03	2014-11-02	2014-11-03	0	0
371	tina garrison	tina	garrison	2014-05-14	Female	1969-03-12	47	Greater than 45	Caucasian	0	5	0	0	2	-1	2014-05-13 09:14:33	2014-05-16 09:29:16	14006667CF10A	2014-05-13		1	(F2)	Deliver Cocaine	0									0					Risk of Recidivism	5	Medium	2014-05-14	Risk of Violence	1	Low	2014-05-14	2014-05-13	2014-05-16	2	2
372	claire aspelly	claire	aspelly	2013-10-23	Female	1975-06-08	40	25 - 45	Other	0	2	0	0	3	-1	2013-10-22 09:03:15	2013-10-23 09:05:27	13014829CF10A	2013-10-22		1	(F3)	Driving While License Revoked	0									0					Risk of Recidivism	2	Low	2013-10-23	Risk of Violence	1	Low	2013-10-23	2013-10-22	2013-10-23	3	0
373	peter septembre	peter	septembre	2014-04-10	Male	1992-02-14	24	Less than 25	Other	0	2	0	0	0	-1	2014-04-09 04:49:45	2014-04-10 08:25:43	14006034MM10A	2014-04-09		1	(M1)	Battery	0									0					Risk of Recidivism	2	Low	2014-04-10	Risk of Violence	3	Low	2014-04-10	2014-04-09	2014-04-10	0	0
374	anthony kasprow	anthony	kasprow	2014-03-11	Male	1980-01-31	36	25 - 45	Caucasian	0	7	0	0	8	150	2014-08-08 04:01:22	2014-08-30 08:45:38	14003451CF10A	2014-03-11		0	(F3)	Felony Driving While Lic Suspd	1	14012031MM10A	(M1)	0	2014-08-08	Battery	2014-08-08	2014-08-30		1	14012031MM10A	(M1)	2014-08-08	Battery	Risk of Recidivism	7	Medium	2014-03-11	Risk of Violence	9	High	2014-03-11	2014-08-08	2014-08-30	8	0
375	michael mackrell	michael	mackrell	2014-02-12	Male	1985-05-14	30	25 - 45	Caucasian	0	2	0	0	4	-140	2013-09-25 02:54:17	2013-11-26 12:02:49	13013491CF10A	2013-09-25		140	(F3)	False Imprisonment	0									0					Risk of Recidivism	2	Low	2014-02-12	Risk of Violence	2	Low	2014-02-12	2013-09-25	2013-11-26	4	0
376	mark plummer	mark	plummer	2014-03-18	Male	1993-12-22	22	Less than 25	African-American	0	9	0	0	3	161	2014-08-26 09:15:02	2014-08-27 04:21:56	13016165MM10A	2013-08-22		208	(M2)	Prowling/Loitering	1	14016921TC10A	(M2)	128	2014-04-20	Unlaw LicTag/Sticker Attach	2014-08-26	2014-08-27		1	14017564MM10A	(M1)	2014-12-14	Battery	Risk of Recidivism	9	High	2014-03-18	Risk of Violence	9	High	2014-03-18	2016-03-05	2016-03-21	3	0
377	ashley emond	ashley	emond	2013-09-30	Female	1991-05-18	24	Less than 25	Caucasian	0	7	0	0	1	-32	2013-08-29 02:32:59	2013-09-27 06:25:27	13016565MM10A	2013-08-29		32	(M1)	Battery	1	14015676MM10A	(M1)	0	2014-10-29	Battery	2014-10-29	2014-10-30		1	14015676MM10A	(M1)	2014-10-29	Battery	Risk of Recidivism	7	Medium	2013-09-30	Risk of Violence	5	Medium	2013-09-30	2014-10-29	2014-10-30	1	0
378	antonio cooper	antonio	cooper	2014-07-09	Male	1989-02-07	27	25 - 45	African-American	0	2	0	0	3	-44	2014-05-26 12:17:57	2014-06-02 06:46:02	14008448MM10A	2014-05-24		46	(M1)	Viol Prot Injunc Repeat Viol	1	15008890CF10A	(F3)	0	2015-07-10	Poss Pyrrolidinovalerophenone	2015-07-10	2015-07-12		0					Risk of Recidivism	2	Low	2014-07-09	Risk of Violence	3	Low	2014-07-09	2015-07-10	2015-07-12	3	0
379	andrea rojas	andrea	rojas	2013-03-09	Female	1984-10-16	31	25 - 45	Hispanic	0	2	0	0	0	-1	2013-03-08 09:57:50	2013-03-09 07:56:27	13004727MM10A	2013-03-08		1	(M1)	Battery	0									0					Risk of Recidivism	2	Low	2013-03-09	Risk of Violence	2	Low	2013-03-09	2013-03-08	2013-03-09	0	0
380	terryl crawford	terryl	crawford	2014-07-07	Male	1968-05-28	47	Greater than 45	African-American	0	1	0	0	0	-1	2014-07-06 05:23:21	2014-07-07 07:55:23	14010371MM10A	2014-07-06		1	(M1)	Battery	0									0					Risk of Recidivism	1	Low	2014-07-07	Risk of Violence	2	Low	2014-07-07	2014-07-06	2014-07-07	0	0
381	jhonatan franco	jhonatan	franco	2013-01-31	Male	1992-05-29	23	Less than 25	Hispanic	0	6	0	1	1	-1	2013-01-30 01:13:56	2013-01-31 07:24:25	13001516CF10A		2013-01-30	1	(F3)	arrest case no charge	1	13005901CF10A	(F3)	1	2013-04-23	Grand Theft in the 3rd Degree	2013-04-24	2013-04-25		0					Risk of Recidivism	6	Medium	2013-01-31	Risk of Violence	4	Low	2013-01-31	2013-04-24	2013-04-25	1	0
382	erin hoppus	erin	hoppus	2014-03-12	Female	1992-05-13	23	Less than 25	Caucasian	0	5	0	4	5	-1	2014-03-11 07:31:05	2014-03-12 01:39:43	14003430CF10A		2014-03-11	1	(F2)	arrest case no charge	1	15014607CF10A	(M1)	0	2015-11-09	Possess Drug Paraphernalia	2015-11-09	2015-11-10		0					Risk of Recidivism	5	Medium	2014-03-12	Risk of Violence	7	Medium	2014-03-12	2015-11-09	2015-11-10	5	0
383	david suarez	david	suarez	2013-02-04	Male	1992-02-06	24	Less than 25	Hispanic	0	8	0	0	0	-3	2013-02-01 09:51:10	2013-02-02 01:42:28	13002376MM10A	2013-02-01		3	(M1)	Possess Cannabis/20 Grams Or Less	0									0					Risk of Recidivism	8	High	2013-02-04	Risk of Violence	7	Medium	2013-02-04	2013-02-01	2013-02-02	0	0
384	calvin ellis	calvin	ellis	2014-04-01	Male	1987-01-22	29	25 - 45	African-American	0	3	0	0	1	-1	2014-03-31 02:14:12	2014-04-01 01:22:49	14005495MM10A	2014-03-31		1	(M1)	Battery	0									0					Risk of Recidivism	3	Low	2014-04-01	Risk of Violence	3	Low	2014-04-01	2014-03-31	2014-04-01	1	0
385	tyler tenney	tyler	tenney	2013-11-18	Male	1995-07-14	20	Less than 25	African-American	0	8	0	0	1	-1	2013-11-17 04:24:59	2013-11-18 07:25:07	13015983CF10A	2013-11-17		1	(F3)	Carrying Concealed Firearm	1	14002931CF10A	(F3)	0	2014-03-02	Possession Of Methamphetamine	2014-03-02	2014-07-01		1	14002931CF10A	(F3)	2014-03-02	Felony Battery (Dom Strang)	Risk of Recidivism	8	High	2013-11-18	Risk of Violence	7	Medium	2013-11-18	2014-03-02	2014-07-01	1	0
386	roderick woods	roderick	woods	2013-02-14	Male	1985-11-27	30	25 - 45	African-American	0	6	0	0	2	-1	2013-02-13 11:48:59	2013-02-15 05:23:42	13002274CF10A	2013-02-13		1	(F3)	Carrying Concealed Firearm	1	13010855CF10A	(F2)	135	2013-04-10	Poss Cocaine/Intent To Del/Sel	2013-08-23	2013-09-19		0					Risk of Recidivism	6	Medium	2013-02-14	Risk of Violence	5	Medium	2013-02-14	2013-02-13	2013-02-15	2	1
387	steven justice	steven	justice	2014-08-07	Male	1976-07-20	39	25 - 45	Caucasian	0	2	0	0	1	-1	2014-08-06 10:22:40	2014-08-07 08:29:42	14011918MM10A	2014-08-06		1	(M1)	Battery	0									0					Risk of Recidivism	2	Low	2014-08-07	Risk of Violence	1	Low	2014-08-07	2014-08-06	2014-08-07	1	0
388	darius lockwood	darius	lockwood	2014-06-13	Male	1977-05-14	38	25 - 45	African-American	0	4	0	0	1	-1	2014-06-12 12:56:57	2014-06-13 01:37:57	12003099MM40A	2012-06-14		729	(M1)	Possess Cannabis/20 Grams Or Less	0									0					Risk of Recidivism	4	Low	2014-06-13	Risk of Violence	2	Low	2014-06-13	2014-06-12	2014-06-13	1	0
389	johnny toussaint	johnny	toussaint	2013-03-12	Male	1976-11-20	39	25 - 45	Other	0	1	0	0	0	-1	2013-03-11 10:17:29	2013-03-12 07:59:36	13003569CF10A	2013-03-11		1	(F2)	Throw In Occupied Dwell	0									0					Risk of Recidivism	1	Low	2013-03-12	Risk of Violence	1	Low	2013-03-12	2013-10-02	2013-10-03	0	0
389	johnny toussaint	johnny	toussaint	2013-03-12	Male	1976-11-20	39	25 - 45	Other	0	1	0	0	0	-1	2013-03-11 10:17:29	2013-03-12 07:59:36	13003569CF10A	2013-03-11		1	(F2)	Throw In Occupied Dwell	0									0					Risk of Recidivism	1	Low	2013-03-12	Risk of Violence	1	Low	2013-03-12	2013-10-02	2013-10-03	0	205
390	antonio barnes	antonio	barnes	2013-08-07	Male	1988-06-03	27	25 - 45	African-American	0	4	0	0	4	-1	2013-08-06 09:00:30	2013-08-07 08:23:22	13010054CF10A		2013-08-06	1	(F3)	arrest case no charge	0									0					Risk of Recidivism	4	Low	2013-08-07	Risk of Violence	4	Low	2013-08-07	2015-07-08	2015-07-21	4	0
390	antonio barnes	antonio	barnes	2013-08-07	Male	1988-06-03	27	25 - 45	African-American	0	4	0	0	4	-1	2013-08-06 09:00:30	2013-08-07 08:23:22	13010054CF10A		2013-08-06	1	(F3)	arrest case no charge	0									0					Risk of Recidivism	4	Low	2013-08-07	Risk of Violence	4	Low	2013-08-07	2015-07-08	2015-07-21	4	713
391	malik mccrea	malik	mccrea	2013-11-12	Male	1997-06-20	18	Less than 25	African-American	2	10	0	0	2	-5	2013-11-07 08:25:13	2013-11-08 06:13:38	13015505CF10A		2013-11-07	5	(F7)	arrest case no charge	0									0					Risk of Recidivism	10	High	2013-11-12	Risk of Violence	10	High	2013-11-12	2013-11-24	2013-11-25	2	0
391	malik mccrea	malik	mccrea	2013-11-12	Male	1997-06-20	18	Less than 25	African-American	2	10	0	0	2	-5	2013-11-07 08:25:13	2013-11-08 06:13:38	13015505CF10A		2013-11-07	5	(F7)	arrest case no charge	0									0					Risk of Recidivism	10	High	2013-11-12	Risk of Violence	10	High	2013-11-12	2015-01-09	2015-01-15	2	13
391	malik mccrea	malik	mccrea	2013-11-12	Male	1997-06-20	18	Less than 25	African-American	2	10	0	0	2	-5	2013-11-07 08:25:13	2013-11-08 06:13:38	13015505CF10A		2013-11-07	5	(F7)	arrest case no charge	0									0					Risk of Recidivism	10	High	2013-11-12	Risk of Violence	10	High	2013-11-12	2015-01-15	2015-07-21	2	616
392	gershon rapoport	gershon	rapoport	2013-07-16	Male	1984-09-15	31	25 - 45	Caucasian	0	4	0	0	2	812	2015-10-06 11:57:33	2015-10-17 07:38:17	08008163MM10A		2010-10-04	1016	(M1)	arrest case no charge	1	15012910CF10A	(F3)	0	2015-10-06	Possession of Cocaine	2015-10-06	2015-10-17		0					Risk of Recidivism	4	Low	2013-07-16	Risk of Violence	3	Low	2013-07-16	2015-10-06	2015-10-17	2	0
393	ruth etienne	ruth	etienne	2013-12-03	Female	1978-08-23	37	25 - 45	African-American	0	1	0	0	2	0	2013-12-03 12:48:34	2013-12-04 07:43:54	13016786CF10A		2013-12-03	0	(F3)	arrest case no charge	0									0					Risk of Recidivism	1	Low	2013-12-03	Risk of Violence	1	Low	2013-12-03	2014-09-23	2014-10-07	2	1
393	ruth etienne	ruth	etienne	2013-12-03	Female	1978-08-23	37	25 - 45	African-American	0	1	0	0	2	0	2013-12-03 12:48:34	2013-12-04 07:43:54	13016786CF10A		2013-12-03	0	(F3)	arrest case no charge	0									0					Risk of Recidivism	1	Low	2013-12-03	Risk of Violence	1	Low	2013-12-03	2014-09-23	2014-10-07	2	308
394	sterling cochrane	sterling	cochrane	2014-06-05	Male	1984-09-22	31	25 - 45	Caucasian	0	2	0	0	0	-1	2014-06-04 06:37:51	2014-06-05 01:29:06	14007718CF10A	2014-06-04		1	(F3)	Possession of Cannabis	0									0					Risk of Recidivism	2	Low	2014-06-05	Risk of Violence	3	Low	2014-06-05	2014-06-04	2014-06-05	0	0
395	cragory pinder	cragory	pinder	2014-11-14	Male	1988-07-02	27	25 - 45	African-American	0	8	0	0	2	-1	2014-11-13 03:21:47	2014-11-14 09:31:38	14015251CF10A	2014-11-13		1	(F3)	Possession of Cocaine	0									0					Risk of Recidivism	8	High	2014-11-14	Risk of Violence	5	Medium	2014-11-14	2014-11-13	2014-11-14	2	0
396	dominick akinpello	dominick	akinpello	2014-02-19	Male	1995-04-20	20	Less than 25	African-American	0	8	0	0	0	-1	2014-02-18 09:37:20	2014-02-21 04:07:45	14002312CF10A	2014-02-18		1	(F3)	Possession Burglary Tools	0									0					Risk of Recidivism	8	High	2014-02-19	Risk of Violence	6	Medium	2014-02-19	2014-02-18	2014-02-21	0	2
397	alfonso young	alfonso	young	2014-08-12	Male	1969-06-30	46	Greater than 45	African-American	1	8	0	0	5	-1	2014-08-11 04:12:33	2015-06-30 07:07:00	10020325MM10A	2010-09-20		1422	(M1)	Battery	0									0					Risk of Recidivism	8	High	2014-08-12	Risk of Violence	6	Medium	2014-08-12	2015-06-30	2015-12-17	5	492
398	sebastian claros	sebastian	claros	2013-04-20	Male	1994-04-16	22	Less than 25	Hispanic	0	7	0	1	0	0	2013-04-20 02:16:15	2013-04-22 03:48:37	13005681CF10A	2013-04-20		0	(F3)	Poss3,4 Methylenedioxymethcath	0									0					Risk of Recidivism	7	Medium	2013-04-20	Risk of Violence	6	Medium	2013-04-20	2013-06-25	2013-07-02	0	2
398	sebastian claros	sebastian	claros	2013-04-20	Male	1994-04-16	22	Less than 25	Hispanic	0	7	0	1	0	0	2013-04-20 02:16:15	2013-04-22 03:48:37	13005681CF10A	2013-04-20		0	(F3)	Poss3,4 Methylenedioxymethcath	0									0					Risk of Recidivism	7	Medium	2013-04-20	Risk of Violence	6	Medium	2013-04-20	2013-06-25	2013-07-02	0	73
399	karen storey-broderick	karen	storey-broderick	2013-08-02	Female	1963-09-25	52	Greater than 45	African-American	0	1	0	0	0	-1	2013-08-01 10:03:28	2013-08-02 02:00:46	13010773CF10A	2013-08-01		1	(F3)	Burglary Conveyance Unoccup	0									0					Risk of Recidivism	1	Low	2013-08-02	Risk of Violence	1	Low	2013-08-02	2013-08-01	2013-08-02	0	0
400	daritte bonner	daritte	bonner	2014-08-02	Female	1993-01-24	23	Less than 25	African-American	0	4	0	0	0	-1	2014-08-01 09:19:33	2014-08-05 04:16:00	14010500CF10A	2014-08-01		1	(F3)	Carrying Concealed Firearm	1	15069017TC40A	(M2)		2015-11-13	Operating W/O Valid License				0					Risk of Recidivism	4	Low	2014-08-02	Risk of Violence	4	Low	2014-08-02	2014-08-01	2014-08-05	0	3
401	robert raiford	robert	raiford	2014-09-16	Male	1996-02-01	20	Less than 25	African-American	1	7	0	0	1	0	2014-09-16 12:31:02	2014-10-09 04:25:33	13016100CF10A		2014-09-16	0	(F2)	arrest case no charge	0									0					Risk of Recidivism	7	Medium	2014-09-16	Risk of Violence	10	High	2014-09-16	2014-11-13	2014-12-23	1	23
401	robert raiford	robert	raiford	2014-09-16	Male	1996-02-01	20	Less than 25	African-American	1	7	0	0	1	0	2014-09-16 12:31:02	2014-10-09 04:25:33	13016100CF10A		2014-09-16	0	(F2)	arrest case no charge	0									0					Risk of Recidivism	7	Medium	2014-09-16	Risk of Violence	10	High	2014-09-16	2014-12-23	2015-05-01	1	227
402	roselia scott	roselia	scott	2013-11-13	Female	1967-08-30	48	Greater than 45	African-American	0	2	0	0	0	-1	2013-11-12 10:24:10	2013-11-14 06:47:41	13015723CF10A	2013-11-12		1	(F3)	Aggravated Assault W/Dead Weap	0									0					Risk of Recidivism	2	Low	2013-11-13	Risk of Violence	3	Low	2013-11-13	2013-11-12	2013-11-14	0	1
403	johnny franklin	johnny	franklin	2013-07-26	Male	1949-06-17	66	Greater than 45	African-American	0	6	0	0	8				12000507CF10A	2012-01-11		562	(F2)	Deliver Cocaine	1	15013743TC40A	(M2)		2015-02-17	Leave Acc/Attend Veh/More $50				0					Risk of Recidivism	6	Medium	2013-07-26	Risk of Violence	1	Low	2013-07-26	2001-07-10	2003-08-29	8	0
404	daniel carvallo	daniel	carvallo	2013-04-20	Male	1990-07-20	25	25 - 45	Caucasian	0	5	0	0	0	0	2013-04-20 02:39:55	2013-04-20 07:15:12	13005683CF10A	2013-04-19		1	(F3)	Deliver 3,4 Methylenediox	0									0					Risk of Recidivism	5	Medium	2013-04-20	Risk of Violence	4	Low	2013-04-20	2014-04-10	2014-04-15	0	0
404	daniel carvallo	daniel	carvallo	2013-04-20	Male	1990-07-20	25	25 - 45	Caucasian	0	5	0	0	0	0	2013-04-20 02:39:55	2013-04-20 07:15:12	13005683CF10A	2013-04-19		1	(F3)	Deliver 3,4 Methylenediox	0									0					Risk of Recidivism	5	Medium	2013-04-20	Risk of Violence	4	Low	2013-04-20	2014-04-10	2014-04-15	0	360
405	gary hrinda	gary	hrinda	2013-04-08	Male	1988-06-06	27	25 - 45	Caucasian	0	6	0	0	0	-1	2013-04-07 11:02:06	2013-04-09 04:14:39	13004978CF10A	2013-04-07		1	(F3)	Grand Theft in the 3rd Degree	1	13015848CF10A	(F3)	0	2013-11-14	Aggravated Assault W/Dead Weap	2013-11-14	2014-07-14		1	13015848CF10A	(F3)	2013-11-14	Aggravated Assault W/Dead Weap	Risk of Recidivism	6	Medium	2013-04-08	Risk of Violence	7	Medium	2013-04-08	2013-11-14	2014-07-14	0	1
406	horace orie	horace	orie	2014-10-02	Male	1986-04-17	30	25 - 45	African-American	0	7	0	0	11	0	2014-10-02 03:21:16	2014-10-03 03:32:38	14013295CF10A	2014-10-02		0	(F3)	Unauth Poss ID Card or DL	1	15004417MM10A	(M1)	0	2015-04-17	Possess Drug Paraphernalia	2015-04-17	2015-04-18		0					Risk of Recidivism	7	Medium	2014-10-02	Risk of Violence	6	Medium	2014-10-02	2015-04-17	2015-04-18	11	1
407	markendy metayer	markendy	metayer	2013-01-11	Male	1993-12-31	22	Less than 25	African-American	0	10	1	1	3	-1	2013-01-10 03:17:29	2013-01-11 11:36:36	13000595MM10A	2013-01-10		1	(M1)	Battery	1	13001027MM10A	(M1)	0	2013-01-15	Resist/Obstruct W/O Violence	2013-01-15	2013-01-17		0					Risk of Recidivism	10	High	2013-01-11	Risk of Violence	7	Medium	2013-01-11	2013-01-15	2013-01-17	3	0
408	genny robbins	genny	robbins	2013-12-31	Female	1993-05-16	22	Less than 25	Caucasian	0	3	0	0	1	-1	2013-12-30 10:48:07	2013-12-31 09:49:50	13017994CF10A	2013-12-30		1	(F3)	Pos Cannabis W/Intent Sel/Del	0									0					Risk of Recidivism	3	Low	2013-12-31	Risk of Violence	4	Low	2013-12-31	2013-12-30	2013-12-31	1	0
409	laroyce odom	laroyce	odom	2014-01-24	Male	1980-12-19	35	25 - 45	African-American	0	10	0	0	2				14001155CF10A		2014-01-23	1	(F3)	arrest case no charge	0									0					Risk of Recidivism	10	High	2014-01-24	Risk of Violence	8	High	2014-01-24	2004-06-16	2005-03-04	2	0
410	john provenzano	john	provenzano	2013-09-06	Male	1984-04-04	32	25 - 45	Caucasian	0	4	0	0	2	-232	2013-01-17 09:43:27	2013-02-26 11:12:02	12017006CF10A		2013-01-17	232	(F3)	arrest case no charge	0									0					Risk of Recidivism	4	Low	2013-09-06	Risk of Violence	4	Low	2013-09-06	2013-01-17	2013-02-26	2	0
411	jarah king	jarah	king	2013-08-05	Female	1975-03-11	41	25 - 45	African-American	0	3	0	0	2	-1	2013-08-04 07:42:27	2013-08-05 06:31:46	13010816CF10A	2013-08-04		1	(M1)	Battery on Law Enforc Officer	0									0					Risk of Recidivism	3	Low	2013-08-05	Risk of Violence	1	Low	2013-08-05	2013-08-04	2013-08-05	2	0
412	derik gearing	derik	gearing	2014-11-03	Male	1980-11-02	35	25 - 45	Caucasian	0	8	0	0	9	0	2014-11-03 07:13:59	2014-12-16 08:41:15	14014746CF10A	2014-11-03		0	(F3)	Burglary Conveyance Unoccup	0									0					Risk of Recidivism	8	High	2014-11-03	Risk of Violence	8	High	2014-11-03	2014-11-03	2014-12-16	9	43
413	patrick calder	patrick	calder	2014-12-26	Male	1973-03-20	43	25 - 45	African-American	0	1	0	0	0	0	2014-12-26 04:11:19	2014-12-31 05:37:20	14017061CF10A	2014-12-26		0	(F2)	Burglary Dwelling Occupied	0									0					Risk of Recidivism	1	Low	2014-12-26	Risk of Violence	1	Low	2014-12-26	2014-12-26	2014-12-31	0	5
414	sarah guerrier	sarah	guerrier	2014-01-29	Female	1990-09-14	25	25 - 45	Other	0	2	0	0	0	-1	2014-01-28 10:39:22	2014-01-29 08:33:42	14001235CF10A	2014-01-28		1	(F3)	Aggravated Assault W/Dead Weap	0									0					Risk of Recidivism	2	Low	2014-01-29	Risk of Violence	3	Low	2014-01-29	2014-01-28	2014-01-29	0	0
415	james martin	james	martin	2013-04-11	Male	1971-10-07	44	25 - 45	African-American	0	7	0	0	24	53	2013-06-03 12:59:33	2013-09-29 05:18:00	13013026TC10A	2013-03-11		31	(M1)	Opert With Susp DL 2nd Offens	0									0					Risk of Recidivism	7	Medium	2013-04-11	Risk of Violence	3	Low	2013-04-11	2013-06-03	2013-09-29	24	0
415	james martin	james	martin	2013-04-11	Male	1971-10-07	44	25 - 45	African-American	0	7	0	0	24	53	2013-06-03 12:59:33	2013-09-29 05:18:00	13013026TC10A	2013-03-11		31	(M1)	Opert With Susp DL 2nd Offens	0									0					Risk of Recidivism	7	Medium	2013-04-11	Risk of Violence	3	Low	2013-04-11	2013-06-03	2013-09-29	24	171
416	terry miller	terry	miller	2013-12-10	Male	1963-07-14	52	Greater than 45	African-American	0	6	0	0	3	0	2013-12-10 12:12:27	2014-01-04 10:22:47	13017014CF10A	2013-12-09		1	(F3)	Possession of Cocaine	1	14000935CF10A	(F3)	0	2014-01-22	Possession of Cocaine	2014-01-22	2014-03-05		0					Risk of Recidivism	6	Medium	2013-12-10	Risk of Violence	2	Low	2013-12-10	2014-01-22	2014-03-05	3	25
417	alfranzwell myers	alfranzwell	myers	2013-04-05	Male	1972-05-07	43	25 - 45	African-American	0	1	0	0	0	-1	2013-04-04 07:55:57	2013-05-15 08:09:02	13004852CF10A	2013-04-04		1	(F3)	Felony Battery (Dom Strang)	0									0					Risk of Recidivism	1	Low	2013-04-05	Risk of Violence	1	Low	2013-04-05	2013-04-04	2013-05-15	0	40
418	mathiel durand	mathiel	durand	2014-08-25	Male	1978-04-25	37	25 - 45	African-American	0	1	0	0	0	0	2014-08-25 03:54:52	2014-08-26 09:21:47	14030969MU10A	2014-08-25		0	(M1)	DUI Level 0.15 Or Minor In Veh	0									0					Risk of Recidivism	1	Low	2014-08-25	Risk of Violence	1	Low	2014-08-25	2014-08-25	2014-08-26	0	1
420	emmanuel pierre	emmanuel	pierre	2014-05-10	Male	1968-12-24	47	Greater than 45	Other	0	1	0	0	1	-1	2014-05-09 11:18:45	2014-05-12 12:01:47	14007677MM10A	2014-05-09		1	(M1)	Battery	0									0					Risk of Recidivism	1	Low	2014-05-10	Risk of Violence	1	Low	2014-05-10	2014-05-09	2014-05-12	1	2
421	anthony dimeo	anthony	dimeo	2014-10-07	Female	1970-09-25	45	Greater than 45	Caucasian	0	1	0	0	3	-1	2014-10-06 03:39:04	2014-10-13 05:08:49	13008533CF10A		2014-10-06	1	(F3)	arrest case no charge	0									0					Risk of Recidivism	1	Low	2014-10-07	Risk of Violence	1	Low	2014-10-07	2014-10-06	2014-10-13	3	6
422	kayron adams	kayron	adams	2014-08-08	Male	1992-09-10	23	Less than 25	African-American	0	4	0	0	2	-1	2014-08-07 04:19:04	2014-08-09 02:47:06	14010352CF10A		2014-08-07	1	(F3)	arrest case no charge	0									0					Risk of Recidivism	4	Low	2014-08-08	Risk of Violence	4	Low	2014-08-08	2014-08-07	2014-08-09	2	1
423	christopher wolter	christopher	wolter	2014-03-05	Male	1978-05-10	37	25 - 45	Caucasian	0	1	0	0	3	-4	2014-03-01 11:39:37	2014-03-04 09:02:34	13015173CF10A		2014-03-01	4	(F3)	arrest case no charge	0									0					Risk of Recidivism	1	Low	2014-03-05	Risk of Violence	1	Low	2014-03-05	2014-03-01	2014-03-04	3	0
424	immanuel crafton	immanuel	crafton	2014-06-20	Male	1987-05-17	28	25 - 45	African-American	0	4	0	0	3	299	2015-04-15 09:07:50	2015-04-18 02:29:53	14001214MM40A	2014-03-12		100	(M1)	Possess Cannabis/20 Grams Or Less	1	15004954CF10A	(F2)	0	2015-04-15	Aggravated Battery / Pregnant	2015-04-15	2015-04-18		1	15004954CF10A	(F2)	2015-04-15	Aggravated Battery / Pregnant	Risk of Recidivism	4	Low	2014-06-20	Risk of Violence	3	Low	2014-06-20	2015-04-15	2015-04-18	3	0
425	karl weimar	karl	weimar	2013-04-18	Male	1946-03-20	70	Greater than 45	Caucasian	0	1	0	0	1	-13	2013-04-05 11:19:07	2013-04-18 10:45:47	13006582MM10A	2013-04-05		13	(M1)	Battery	0									0					Risk of Recidivism	1	Low	2013-04-18	Risk of Violence	1	Low	2013-04-18	2013-04-05	2013-04-18	1	0
426	anthony santella	anthony	santella	2014-07-01	Male	1962-04-18	54	Greater than 45	Caucasian	0	2	0	0	6	-266	2013-10-08 03:55:57	2013-10-09 02:37:39	13011349CF10A	2013-08-13		322	(F3)	Possession of Cocaine	1	15010739CF10A	(F3)	0	2015-08-19	Possession Of Alprazolam	2015-08-19	2015-08-21		0					Risk of Recidivism	2	Low	2014-07-01	Risk of Violence	1	Low	2014-07-01	2015-08-19	2015-08-21	6	0
427	robert guistolisi	robert	guistolisi	2014-04-06	Male	1957-10-13	58	Greater than 45	Caucasian	0	7	0	0	9	-1	2014-04-05 11:06:59	2014-04-07 02:42:53	14005790MM10A	2014-04-05		1	(M1)	Battery	0									0					Risk of Recidivism	7	Medium	2014-04-06	Risk of Violence	2	Low	2014-04-06	2014-04-05	2014-04-07	9	1
428	john fox	john	fox	2013-05-01	Male	1970-02-13	46	Greater than 45	Caucasian	0	4	0	0	3	-1	2013-04-30 04:31:44	2013-05-14 09:41:21	06021703CF10A		2013-04-30	1	(F3)	arrest case no charge	0									0					Risk of Recidivism	4	Low	2013-05-01	Risk of Violence	2	Low	2013-05-01	2013-04-30	2013-05-14	3	13
429	ahmaad hodges	ahmaad	hodges	2013-03-04	Male	1994-06-10	21	Less than 25	African-American	0	9	0	0	0	-1	2013-03-03 04:32:45	2013-03-04 07:27:23	13004316MM10A	2013-03-03		1	(M2)	Petit Theft	1	13022684MM10A	(M2)	0	2013-12-07	Petit Theft	2013-12-07	2013-12-08		0					Risk of Recidivism	9	High	2013-03-04	Risk of Violence	7	Medium	2013-03-04	2013-12-07	2013-12-08	0	0
430	milot bastian	milot	bastian	2014-07-15	Male	1989-09-13	26	25 - 45	African-American	0	8	0	0	1	-1	2014-07-14 06:15:12	2014-07-16 02:43:22	14010769MM10A	2014-07-14		1	(M1)	Battery	1	15011432CF10A	(F3)	0	2015-09-03	Tamper With Witness/Victim/CI	2015-09-03	2015-09-14		1	15011432CF10A	(F3)	2015-09-03	Aggravated Assault W/Dead Weap	Risk of Recidivism	8	High	2014-07-15	Risk of Violence	6	Medium	2014-07-15	2015-09-03	2015-09-14	1	1
431	manuel luque	manuel	luque	2013-06-10	Male	1977-10-19	38	25 - 45	Hispanic	0	1	0	0	3	23	2013-07-03 03:38:42	2013-07-05 01:58:20	13004056CF10A	2013-03-20		82	(F3)	Crim Use of Personal ID Info	1	13009368CF10A	(F3)	0	2013-07-03	Grand Theft in the 3rd Degree	2013-07-03	2013-07-05		0					Risk of Recidivism	1	Low	2013-06-10	Risk of Violence	1	Low	2013-06-10	2013-07-03	2013-07-05	3	0
432	dale quimby	dale	quimby	2014-01-20	Male	1982-01-10	34	25 - 45	Caucasian	0	4	0	0	5	-1	2014-01-19 03:20:12	2014-01-20 07:58:57	14000963MM10A	2014-01-19		1	(M1)	Battery	0									0					Risk of Recidivism	4	Low	2014-01-20	Risk of Violence	4	Low	2014-01-20	2014-01-19	2014-01-20	5	0
433	dorca bahoque	dorca	bahoque	2014-10-11	Female	1982-02-19	34	25 - 45	Caucasian	0	8	0	0	0	-1	2014-10-10 07:50:57	2014-10-13 09:11:55	14013704CF10A	2014-10-10		1	(F3)	Poss Unlaw Issue Id	0									0					Risk of Recidivism	8	High	2014-10-11	Risk of Violence	4	Low	2014-10-11	2015-04-15	2015-07-16	0	2
433	dorca bahoque	dorca	bahoque	2014-10-11	Female	1982-02-19	34	25 - 45	Caucasian	0	8	0	0	0	-1	2014-10-10 07:50:57	2014-10-13 09:11:55	14013704CF10A	2014-10-10		1	(F3)	Poss Unlaw Issue Id	0									0					Risk of Recidivism	8	High	2014-10-11	Risk of Violence	4	Low	2014-10-11	2015-07-16	2020-01-01	0	538
434	bernard young	bernard	young	2014-12-11	Male	1996-07-06	19	Less than 25	African-American	0	5	0	0	1	-48	2014-10-24 09:01:54	2014-12-11 10:38:56	14014333CF10A	2014-10-24		48	(F3)	Grand Theft in the 3rd Degree	1	16002972MM10A	(M1)	0	2016-03-27		2016-03-27	2016-04-06		0					Risk of Recidivism	5	Medium	2014-12-11	Risk of Violence	7	Medium	2014-12-11	2016-03-27	2016-04-06	1	0
435	vladimir ducard	vladimir	ducard	2013-12-04	Male	1981-12-15	34	25 - 45	African-American	0	4	0	0	5	-1	2013-12-03 09:45:00	2013-12-04 08:51:32	13022481MM10A	2013-12-03		1	(M2)	Driving License Suspended	0									0					Risk of Recidivism	4	Low	2013-12-04	Risk of Violence	4	Low	2013-12-04	2013-12-03	2013-12-04	5	0
436	nicole lindo	nicole	lindo	2014-06-26	Female	1984-01-04	32	25 - 45	African-American	0	4	0	0	3	-26	2014-05-31 09:32:34	2014-06-04 09:23:06	14008687MM10A	2014-05-31		26	(M1)	Battery	0									0					Risk of Recidivism	4	Low	2014-06-26	Risk of Violence	3	Low	2014-06-26	2014-05-31	2014-06-04	3	0
437	alex garay	alex	garay	2014-02-27	Male	1992-05-05	23	Less than 25	Caucasian	0	5	0	0	0	0	2014-02-27 12:30:23	2014-02-28 04:08:47	14002791CF10A	2014-02-26		1	(F3)	Aggravated Assault W/Dead Weap	1	15022297TC40A	(M2)		2015-03-07	Leave Acc/Attend Veh/More $50				0					Risk of Recidivism	5	Medium	2014-02-27	Risk of Violence	5	Medium	2014-02-27	2014-02-27	2014-02-28	0	1
438	johnny owens	johnny	owens	2013-01-31	Male	1981-06-29	34	25 - 45	African-American	0	4	0	0	5	-1	2013-01-30 11:54:49	2013-02-02 07:32:19	13001502CF10A	2013-01-30		1	(F3)	Possession of Oxycodone	1	13010275CF10A	(M1)	1	2013-07-21	Possess Cannabis/20 Grams Or Less	2013-07-22	2013-09-20		0					Risk of Recidivism	4	Low	2013-01-31	Risk of Violence	2	Low	2013-01-31	2013-01-30	2013-02-02	5	2
439	widner francois	widner	francois	2013-10-25	Male	1985-11-11	30	25 - 45	African-American	0	1	0	0	2	-83	2013-08-03 02:56:01	2013-10-25 10:49:05	13004490CF10A		2013-08-03	83	(F2)	arrest case no charge	0									0					Risk of Recidivism	1	Low	2013-10-25	Risk of Violence	2	Low	2013-10-25	2013-08-03	2013-10-25	2	0
440	trevin miller	trevin	miller	2013-11-05	Male	1976-09-22	39	25 - 45	African-American	0	3	0	0	6	-1	2013-11-04 06:35:23	2013-11-07 03:15:19	13015381CF10A	2013-11-04		1	(F2)	Aggravated Battery / Pregnant	1	14008136TC10A	(M2)		2013-12-23	Driving License Suspended				0					Risk of Recidivism	3	Low	2013-11-05	Risk of Violence	1	Low	2013-11-05	2013-11-04	2013-11-07	6	2
441	mohammed alshibi	mohammed	alshibi	2013-04-09	Male	1991-06-20	24	Less than 25	Other	0	3	0	0	0	-1	2013-04-08 08:55:48	2013-04-09 10:21:22	13005050CF10A	2013-04-08		1	(F3)	Failure To Return Hired Vehicle	0									0					Risk of Recidivism	3	Low	2013-04-09	Risk of Violence	5	Medium	2013-04-09	2013-04-08	2013-04-09	0	0
442	frans barens	frans	barens	2014-06-30	Male	1982-05-23	33	25 - 45	Caucasian	0	3	0	0	1	-93	2014-03-29 07:09:12	2014-03-29 09:12:15	14012358MU10A	2014-03-29		93	(M1)	Driving Under The Influence	1	15010566CF10A	(F3)	0	2015-08-16	Tamper With Witness/Victim/CI	2015-08-16	2015-08-17		1	15010566CF10A	(F3)	2015-08-16	Felony Battery (Dom Strang)	Risk of Recidivism	3	Low	2014-06-30	Risk of Violence	2	Low	2014-06-30	2015-08-16	2015-08-17	1	0
443	kevin abel	kevin	abel	2014-10-22	Male	1982-05-22	33	25 - 45	Caucasian	0	2	0	0	0	-1	2014-10-21 06:54:35	2014-10-22 12:38:57	14014180CF10A	2014-10-21		1	(F3)	Possession of Cocaine	0									0					Risk of Recidivism	2	Low	2014-10-22	Risk of Violence	1	Low	2014-10-22	2014-10-21	2014-10-22	0	0
444	eric smith	eric	smith	2014-07-30	Male	1975-11-01	40	25 - 45	Caucasian	0	4	0	0	6	-39	2014-06-21 02:18:26	2014-06-30 11:33:03	07028672MM10A	2007-12-17		2417	(M1)	Viol Injunct Domestic Violence	0									0					Risk of Recidivism	4	Low	2014-07-30	Risk of Violence	2	Low	2014-07-30	2014-06-21	2014-06-30	6	0
445	orlando gomez	orlando	gomez	2013-02-23	Male	1957-11-28	58	Greater than 45	Caucasian	0	3	0	0	2	-1	2013-02-22 07:47:53	2013-02-24 02:27:52	13002760CF10A	2013-02-22		1	(F2)	Agg Fleeing/Eluding High Speed	0									0					Risk of Recidivism	3	Low	2013-02-23	Risk of Violence	1	Low	2013-02-23	2013-02-22	2013-02-24	2	1
446	mikerlie debe	mikerlie	debe	2013-01-01	Female	1994-10-09	21	Less than 25	African-American	0	6	0	0	0	0	2013-01-01 04:17:22	2013-01-02 01:14:43	13000062MM10A	2013-01-01		0	(M1)	Battery	0									0					Risk of Recidivism	6	Medium	2013-01-01	Risk of Violence	7	Medium	2013-01-01	2013-01-01	2013-01-02	0	1
447	david lazarus	david	lazarus	2014-08-28	Male	1971-06-03	44	25 - 45	Asian	0	2	0	0	2	-372	2013-08-21 09:19:06	2014-08-15 06:41:22	13011754CF10A	2013-08-21		372	(F2)	Sexual Battery / Vict 12 Yrs +	0									0					Risk of Recidivism	2	Low	2014-08-28	Risk of Violence	1	Low	2014-08-28	2013-08-21	2014-08-15	2	0
448	dexter hines	dexter	hines	2013-04-28	Male	1959-07-05	56	Greater than 45	African-American	0	8	0	0	13	0	2013-04-28 01:42:04	2014-08-18 11:04:32	13006088CF10A	2013-04-27		1	(F3)	Burglary Structure Unoccup	0									0					Risk of Recidivism	8	High	2013-04-28	Risk of Violence	3	Low	2013-04-28	2013-04-28	2014-08-18	13	477
449	trice rozhon	trice	rozhon	2014-05-01	Male	1988-12-21	27	25 - 45	Caucasian	0	5	0	0	1	0	2014-05-01 06:10:33	2014-05-09 08:22:15	14006075CF10A	2014-05-01		0	(F3)	Obstruct Officer W/Violence	0									0					Risk of Recidivism	5	Medium	2014-05-01	Risk of Violence	3	Low	2014-05-01	2014-05-01	2014-05-09	1	8
450	ernest kinard	ernest	kinard	2013-08-09	Male	1994-08-06	21	Less than 25	African-American	0	5	0	0	1	-36	2013-07-04 07:01:53	2013-08-09 11:23:41	13009398CF10A	2013-07-04		36	(F3)	Attempted Robbery No Weapon	1	16003477CF10A	(F2)	0	2016-03-21		2016-03-21	2016-04-01		0					Risk of Recidivism	5	Medium	2013-08-09	Risk of Violence	7	Medium	2013-08-09	2016-03-21	2016-04-01	1	0
451	otis wimberly	otis	wimberly	2013-12-06	Male	1993-03-01	23	Less than 25	African-American	0	8	0	1	4	-11	2013-11-25 06:26:46	2013-12-06 10:30:18	13022144MM10A	2013-11-25		11	(M1)	Possess Cannabis/20 Grams Or Less	1	14012035MM10A	(M1)	0	2014-08-09	Possess Cannabis/20 Grams Or Less	2014-08-09	2014-08-13		0					Risk of Recidivism	8	High	2013-12-06	Risk of Violence	5	Medium	2013-12-06	2014-08-09	2014-08-13	4	0
452	steven lux	steven	lux	2013-01-05	Male	1953-06-15	62	Greater than 45	Caucasian	0	1	0	0	0	0	2013-01-05 04:35:31	2013-01-07 03:18:03	13000208CF10A	2013-01-05		0	(F3)	False Imprisonment	0									0					Risk of Recidivism	1	Low	2013-01-05	Risk of Violence	1	Low	2013-01-05	2014-03-25	2014-03-26	0	2
452	steven lux	steven	lux	2013-01-05	Male	1953-06-15	62	Greater than 45	Caucasian	0	1	0	0	0	0	2013-01-05 04:35:31	2013-01-07 03:18:03	13000208CF10A	2013-01-05		0	(F3)	False Imprisonment	0									0					Risk of Recidivism	1	Low	2013-01-05	Risk of Violence	1	Low	2013-01-05	2014-04-08	2014-12-04	0	445
452	steven lux	steven	lux	2013-01-05	Male	1953-06-15	62	Greater than 45	Caucasian	0	1	0	0	0	0	2013-01-05 04:35:31	2013-01-07 03:18:03	13000208CF10A	2013-01-05		0	(F3)	False Imprisonment	0									0					Risk of Recidivism	1	Low	2013-01-05	Risk of Violence	1	Low	2013-01-05	2014-04-08	2014-12-04	0	698
454	terrance mckinney	terrance	mckinney	2013-04-24	Male	1989-01-08	27	25 - 45	African-American	1	8	0	1	4	300	2014-02-18 06:54:26	2014-02-19 01:53:49	11011470MM10A	2011-05-18		707	(M1)	Possess Cannabis/20 Grams Or Less	1	14004524CF10A	(F3)	0	2014-02-18	Grand Theft in the 3rd Degree	2014-02-18	2014-02-19		0					Risk of Recidivism	8	High	2013-04-24	Risk of Violence	10	High	2013-04-24	2014-02-18	2014-02-19	4	0
455	anselo calix	anselo	calix	2014-06-09	Male	1959-01-10	57	Greater than 45	Other	0	1	0	0	6	-1	2014-06-08 06:58:53	2014-06-11 04:36:02	14009084MM10A	2014-06-08		1	(M1)	Battery	0									0					Risk of Recidivism	1	Low	2014-06-09	Risk of Violence	1	Low	2014-06-09	2014-06-08	2014-06-11	6	2
456	chandra hintz	chandra	hintz	2013-12-02	Male	1979-03-04	37	25 - 45	Caucasian	0	3	0	0	5	-1	2013-12-01 04:23:01	2013-12-12 03:25:01	13016617CF10A	2013-12-01		1	(F3)	Battery on Law Enforc Officer	0									0					Risk of Recidivism	3	Low	2013-12-02	Risk of Violence	1	Low	2013-12-02	2013-12-01	2013-12-12	5	10
457	ruel lindsay	ruel	lindsay	2013-08-16	Male	1972-05-14	43	25 - 45	Other	0	2	0	0	2	-1	2013-08-15 06:13:32	2013-08-23 03:50:34	13011490CF10A	2013-08-15		1	(F3)	Grand Theft in the 3rd Degree	1	15006595CF10A	(F3)		2015-04-22	Grand Theft in the 3rd Degree				0					Risk of Recidivism	2	Low	2013-08-16	Risk of Violence	1	Low	2013-08-16	2013-08-15	2013-08-23	2	7
459	lunie mathurin	lunie	mathurin	2013-12-01	Female	1983-05-22	32	25 - 45	African-American	0	1	0	0	5	0	2013-12-01 12:02:58	2013-12-01 09:53:20	13016612CF10A	2013-11-29		2	(F2)	Aggrav Battery w/Deadly Weapon	0									0					Risk of Recidivism	1	Low	2013-12-01	Risk of Violence	1	Low	2013-12-01	2013-12-01	2013-12-01	5	0
460	tabatha royal	tabatha	royal	2014-07-17	Female	1982-07-19	33	25 - 45	African-American	0	3	0	0	2	-1	2014-07-16 08:00:14	2014-07-18 09:13:25	13017164CF10A		2014-07-16	1	(F3)	arrest case no charge	0									0					Risk of Recidivism	3	Low	2014-07-17	Risk of Violence	2	Low	2014-07-17	2014-08-04	2014-09-30	2	1
460	tabatha royal	tabatha	royal	2014-07-17	Female	1982-07-19	33	25 - 45	African-American	0	3	0	0	2	-1	2014-07-16 08:00:14	2014-07-18 09:13:25	13017164CF10A		2014-07-16	1	(F3)	arrest case no charge	0									0					Risk of Recidivism	3	Low	2014-07-17	Risk of Violence	2	Low	2014-07-17	2014-08-04	2014-09-30	2	75
461	juan reyes	juan	reyes	2013-12-31	Male	1992-09-30	23	Less than 25	Hispanic	0	3	0	0	0	-1	2013-12-30 11:58:41	2014-02-14 10:05:11	13017986CF10A	2013-12-30		1	(F3)	Burglary Conveyance Unoccup	0									0					Risk of Recidivism	3	Low	2013-12-31	Risk of Violence	5	Medium	2013-12-31	2015-04-08	2015-04-22	0	45
461	juan reyes	juan	reyes	2013-12-31	Male	1992-09-30	23	Less than 25	Hispanic	0	3	0	0	0	-1	2013-12-30 11:58:41	2014-02-14 10:05:11	13017986CF10A	2013-12-30		1	(F3)	Burglary Conveyance Unoccup	0									0					Risk of Recidivism	3	Low	2013-12-31	Risk of Violence	5	Medium	2013-12-31	2015-04-08	2015-04-22	0	477
462	keishon reeves	keishon	reeves	2013-04-08	Male	1988-06-05	27	25 - 45	African-American	0	1	0	0	0	0	2013-04-08 12:40:45	2013-04-09 07:53:30	13006656MM10A	2013-04-07		1	(M1)	Battery	0									0					Risk of Recidivism	1	Low	2013-04-08	Risk of Violence	2	Low	2013-04-08	2013-04-08	2013-04-09	0	1
463	jeffrey anderson	jeffrey	anderson	2014-01-02	Male	1971-08-12	44	25 - 45	Caucasian	0	1	0	0	0	-1	2014-01-01 04:24:33	2014-01-02 09:45:19	14000043MM10A	2014-01-01		1	(M1)	Battery	1	15009615CF10A	(F3)	0	2015-07-26	Neglect Child / No Bodily Harm	2015-07-26	2015-07-27		0					Risk of Recidivism	1	Low	2014-01-02	Risk of Violence	1	Low	2014-01-02	2015-07-26	2015-07-27	0	0
464	julissa hernandez	julissa	hernandez	2013-02-18	Male	1987-07-26	28	25 - 45	Caucasian	0	3	0	0	3	-1	2013-02-17 01:53:58	2013-02-18 01:13:47	13003414MM10A	2013-02-17		1	(M1)	Battery	1	14034507TC30A	(M2)		2014-04-06	Driving License Suspended				0					Risk of Recidivism	3	Low	2013-02-18	Risk of Violence	3	Low	2013-02-18	2016-01-05	2016-01-05	3	0
465	melissa davis	melissa	davis	2013-05-28	Female	1974-03-11	42	25 - 45	Caucasian	0	2	0	0	0	-3	2013-05-25 04:27:15	2013-05-26 07:10:19	13007473CF10A	2013-05-25		3	(F3)	Possession of Cocaine	0									0					Risk of Recidivism	2	Low	2013-05-28	Risk of Violence	1	Low	2013-05-28	2013-07-24	2013-08-12	0	0
465	melissa davis	melissa	davis	2013-05-28	Female	1974-03-11	42	25 - 45	Caucasian	0	2	0	0	0	-3	2013-05-25 04:27:15	2013-05-26 07:10:19	13007473CF10A	2013-05-25		3	(F3)	Possession of Cocaine	0									0					Risk of Recidivism	2	Low	2013-05-28	Risk of Violence	1	Low	2013-05-28	2013-07-24	2013-08-12	0	76
466	mack richardson	mack	richardson	2013-09-17	Male	1968-04-02	48	Greater than 45	African-American	0	5	0	0	5	-1	2013-09-16 10:27:54	2014-02-03 01:10:17	13006128CF10A		2013-09-16	1	(F3)	arrest case no charge	0									0					Risk of Recidivism	5	Medium	2013-09-17	Risk of Violence	3	Low	2013-09-17	2014-02-20	2014-06-04	5	139
466	mack richardson	mack	richardson	2013-09-17	Male	1968-04-02	48	Greater than 45	African-American	0	5	0	0	5	-1	2013-09-16 10:27:54	2014-02-03 01:10:17	13006128CF10A		2013-09-16	1	(F3)	arrest case no charge	0									0					Risk of Recidivism	5	Medium	2013-09-17	Risk of Violence	3	Low	2013-09-17	2014-02-20	2014-06-04	5	260
467	franki vixama	franki	vixama	2013-03-16	Male	1991-07-21	24	Less than 25	Other	0	10	1	0	9	-1	2013-03-15 12:03:21	2013-03-20 02:58:22	13003838CF10A	2013-03-15		1	(F3)	Resist Officer w/Violence	1	13010824MM10A	(M1)	1	2013-06-04	Resist/Obstruct W/O Violence	2013-06-05	2013-07-19		1	13010824MM10A	(M2)	2013-06-04	Assault	Risk of Recidivism	10	High	2013-03-16	Risk of Violence	10	High	2013-03-16	2013-03-15	2013-03-20	9	4
468	seymour brown	seymour	brown	2014-01-14	Male	1988-04-23	27	25 - 45	African-American	0	2	0	0	0	0	2014-01-14 03:37:34	2014-01-31 09:03:48	14000626CF10A	2014-01-14		0	(F2)	Aggrav Battery w/Deadly Weapon	0									0					Risk of Recidivism	2	Low	2014-01-14	Risk of Violence	3	Low	2014-01-14	2014-01-14	2014-01-31	0	17
469	wayne aristide	wayne	aristide	2014-08-19	Male	1995-05-16	20	Less than 25	African-American	0	10	0	0	0	-1	2014-08-18 05:35:24	2014-08-19 01:42:04	14011290CF10A	2014-08-18		1	(F3)	Grand Theft (Motor Vehicle)	1	14033790TC10A	(M2)	0	2014-09-18	Operating W/O Valid License	2014-09-18	2014-09-22		0					Risk of Recidivism	10	High	2014-08-19	Risk of Violence	9	High	2014-08-19	2014-09-18	2014-09-22	0	0
471	dominick kendrick	dominick	kendrick	2014-07-17	Male	1991-08-30	24	Less than 25	African-American	0	8	0	0	1	-1	2014-07-16 09:20:24	2014-07-19 09:02:00	14009692CF10A	2014-07-16		1	(F3)	Crimin Mischief Damage $1000+	0									0					Risk of Recidivism	8	High	2014-07-17	Risk of Violence	8	High	2014-07-17	2014-11-10	2014-11-26	1	2
471	dominick kendrick	dominick	kendrick	2014-07-17	Male	1991-08-30	24	Less than 25	African-American	0	8	0	0	1	-1	2014-07-16 09:20:24	2014-07-19 09:02:00	14009692CF10A	2014-07-16		1	(F3)	Crimin Mischief Damage $1000+	0									0					Risk of Recidivism	8	High	2014-07-17	Risk of Violence	8	High	2014-07-17	2015-07-09	2015-07-29	1	132
471	dominick kendrick	dominick	kendrick	2014-07-17	Male	1991-08-30	24	Less than 25	African-American	0	8	0	0	1	-1	2014-07-16 09:20:24	2014-07-19 09:02:00	14009692CF10A	2014-07-16		1	(F3)	Crimin Mischief Damage $1000+	0									0					Risk of Recidivism	8	High	2014-07-17	Risk of Violence	8	High	2014-07-17	2015-07-09	2015-07-29	1	377
472	chad lenox	chad	lenox	2014-10-08	Male	1984-05-21	31	25 - 45	Caucasian	2	10	0	0	6	-1	2014-10-07 01:30:52	2015-03-19 06:55:00	14013541CF10A	2014-10-07		1	(F3)	Felony Petit Theft	0									0					Risk of Recidivism	10	High	2014-10-08	Risk of Violence	9	High	2014-10-08	2015-03-19	2020-01-01	6	541
473	shakeem hall	shakeem	hall	2013-02-21	Male	1993-05-05	22	Less than 25	African-American	0	5	1	0	2	-1	2013-02-20 10:41:47	2013-02-21 09:33:50	13002622CF10A		2013-02-20	1	(F1)	arrest case no charge	0									0					Risk of Recidivism	5	Medium	2013-02-21	Risk of Violence	7	Medium	2013-02-21	2014-05-02	2014-05-06	2	0
473	shakeem hall	shakeem	hall	2013-02-21	Male	1993-05-05	22	Less than 25	African-American	0	5	1	0	2	-1	2013-02-20 10:41:47	2013-02-21 09:33:50	13002622CF10A		2013-02-20	1	(F1)	arrest case no charge	0									0					Risk of Recidivism	5	Medium	2013-02-21	Risk of Violence	7	Medium	2013-02-21	2014-05-06	2020-01-01	2	1135
474	ann-marie cassagnol	ann-marie	cassagnol	2014-03-22	Female	1964-08-13	51	Greater than 45	Caucasian	0	1	0	0	0	0	2014-03-22 02:29:28	2014-03-23 09:07:31	14004060CF10A	2014-03-21		1	(M1)	Battery on Law Enforc Officer	0									0					Risk of Recidivism	1	Low	2014-03-22	Risk of Violence	1	Low	2014-03-22	2014-03-22	2014-03-23	0	1
475	stephen kushner	stephen	kushner	2013-12-11	Male	1959-11-10	56	Greater than 45	Caucasian	0	1	0	0	0	0	2013-12-11 03:02:20	2013-12-12 08:42:00	13017125CF10A	2013-12-10		1	(M1)	Battery On Parking Enfor Speci	0									0					Risk of Recidivism	1	Low	2013-12-11	Risk of Violence	1	Low	2013-12-11	2013-12-11	2013-12-12	0	1
476	alain clerie	alain	clerie	2014-09-24	Male	1995-05-24	20	Less than 25	Caucasian	0	6	0	0	0	-1	2014-09-23 09:53:52	2014-09-24 01:33:15	14014100MM10A	2014-09-23		1	(M1)	Battery	0									0					Risk of Recidivism	6	Medium	2014-09-24	Risk of Violence	5	Medium	2014-09-24	2014-09-23	2014-09-24	0	0
477	joe fashaw	joe	fashaw	2014-04-15	Male	1962-03-23	54	Greater than 45	African-American	0	3	0	0	1	114	2014-08-07 03:28:16	2014-08-12 06:21:25	13010925CF10A	2013-08-02		256	(F3)	Possession of Cocaine	0									0					Risk of Recidivism	3	Low	2014-04-15	Risk of Violence	2	Low	2014-04-15	2014-08-07	2014-08-12	1	0
477	joe fashaw	joe	fashaw	2014-04-15	Male	1962-03-23	54	Greater than 45	African-American	0	3	0	0	1	114	2014-08-07 03:28:16	2014-08-12 06:21:25	13010925CF10A	2013-08-02		256	(F3)	Possession of Cocaine	0									0					Risk of Recidivism	3	Low	2014-04-15	Risk of Violence	2	Low	2014-04-15	2014-08-12	2014-11-18	1	217
478	patrick scott	patrick	scott	2013-04-25	Male	1986-09-04	29	25 - 45	African-American	0	9	0	0	7	-1	2013-04-24 05:02:29	2013-04-25 09:15:28	13001900CF10A		2013-04-24	1	(F3)	arrest case no charge	0									0					Risk of Recidivism	9	High	2013-04-25	Risk of Violence	6	Medium	2013-04-25	2013-04-24	2013-04-25	7	0
479	boris vaysbeg	boris	vaysbeg	2014-04-06	Male	1973-08-18	42	25 - 45	Caucasian	0	4	0	0	0	-1	2014-04-05 06:27:56	2014-04-06 07:52:40	14004718CF10A	2014-04-05		1	(F2)	Tampering With A Victim	0									0					Risk of Recidivism	4	Low	2014-04-06	Risk of Violence	1	Low	2014-04-06	2014-04-05	2014-04-06	0	0
480	iron holder	iron	holder	2014-01-11	Male	1995-10-27	20	Less than 25	African-American	0	9	0	0	0	-1	2014-01-10 07:41:14	2014-08-08 05:21:03	14000429CF10A	2014-01-10		1	(F3)	Grand Theft in the 3rd Degree	1	14014226MO10A	(MO3)	0	2014-09-26	Enter City Park/ Prohibited Hrs	2014-09-26	2014-10-11		0					Risk of Recidivism	9	High	2014-01-11	Risk of Violence	8	High	2014-01-11	2014-09-26	2014-10-11	0	209
481	david daffron	david	daffron	2013-10-03	Male	1963-02-19	53	Greater than 45	Caucasian	0	1	0	0	6	-176	2013-04-10 03:34:51	2013-10-01 05:23:18	13005144CF10A		2013-04-10	176	(F3)	arrest case no charge	0									0					Risk of Recidivism	1	Low	2013-10-03	Risk of Violence	1	Low	2013-10-03	2013-04-10	2013-10-01	6	0
482	lorenzo coleman	lorenzo	coleman	2014-09-11	Male	1967-07-27	48	Greater than 45	African-American	0	8	0	0	8	-1	2014-09-10 03:29:06	2014-10-13 08:40:24	11015242MM10A		2011-10-05	1072	(M1)	arrest case no charge	0									0					Risk of Recidivism	8	High	2014-09-11	Risk of Violence	1	Low	2014-09-11	2015-06-23	2020-01-01	8	32
482	lorenzo coleman	lorenzo	coleman	2014-09-11	Male	1967-07-27	48	Greater than 45	African-American	0	8	0	0	8	-1	2014-09-10 03:29:06	2014-10-13 08:40:24	11015242MM10A		2011-10-05	1072	(M1)	arrest case no charge	0									0					Risk of Recidivism	8	High	2014-09-11	Risk of Violence	1	Low	2014-09-11	2015-06-23	2020-01-01	8	568
483	nigel brown	nigel	brown	2014-12-16	Male	1991-09-05	24	Less than 25	Other	0	2	0	0	0	-1	2014-12-15 05:25:20	2014-12-16 07:51:21	14016630CF10A	2014-12-15		1	(F3)	Felony Battery (Dom Strang)	0									0					Risk of Recidivism	2	Low	2014-12-16	Risk of Violence	3	Low	2014-12-16	2014-12-15	2014-12-16	0	0
484	kristopher thibault	kristopher	thibault	2013-02-22	Male	1988-06-24	27	25 - 45	Caucasian	0	5	0	0	8	-1	2013-02-21 07:20:51	2013-04-30 10:43:29	13002078CF10A		2013-02-21	1	(F3)	arrest case no charge	0									0					Risk of Recidivism	5	Medium	2013-02-22	Risk of Violence	3	Low	2013-02-22	2014-02-27	2014-10-24	8	67
484	kristopher thibault	kristopher	thibault	2013-02-22	Male	1988-06-24	27	25 - 45	Caucasian	0	5	0	0	8	-1	2013-02-21 07:20:51	2013-04-30 10:43:29	13002078CF10A		2013-02-21	1	(F3)	arrest case no charge	0									0					Risk of Recidivism	5	Medium	2013-02-22	Risk of Violence	3	Low	2013-02-22	2014-02-27	2014-10-24	8	609
485	lamuel forbes	lamuel	forbes	2013-03-26	Male	1992-03-15	24	Less than 25	African-American	0	9	1	0	2	-1	2013-03-25 02:04:33	2013-04-13 05:00:10	13004300CF10A	2013-03-25		1	(F3)	Burglary Structure Unoccup	1	13007869CF10A	(M1)	0	2013-06-03	Resist/Obstruct W/O Violence	2013-06-03	2013-07-26		1	14009712CF10A	(F3)	2014-07-15	Felony Battery (Dom Strang)	Risk of Recidivism	9	High	2013-03-26	Risk of Violence	9	High	2013-03-26	2013-06-03	2013-07-26	2	18
486	diana loubeau	diana	loubeau	2014-05-02	Female	1993-10-01	22	Less than 25	African-American	0	3	0	0	0	-1	2014-05-01 09:46:32	2014-05-02 09:39:12	14006068CF10A	2014-05-01		1	(F3)	Grand Theft in the 3rd Degree	0									0					Risk of Recidivism	3	Low	2014-05-02	Risk of Violence	4	Low	2014-05-02	2014-05-01	2014-05-02	0	0
487	timothy ryan	timothy	ryan	2014-12-11	Male	1963-04-02	53	Greater than 45	Caucasian	0	6	0	0	36	-7	2014-12-04 08:28:26	2015-01-06 08:20:11	14016166CF10A	2014-12-04		7	(F3)	Corrupt Public Servant	1	15001673MM20A	(M1)		2015-06-25	Trespass Other Struct/Conve				0					Risk of Recidivism	6	Medium	2014-12-11	Risk of Violence	9	High	2014-12-11	2015-05-08	2015-05-09	36	26
487	timothy ryan	timothy	ryan	2014-12-11	Male	1963-04-02	53	Greater than 45	Caucasian	0	6	0	0	36	-7	2014-12-04 08:28:26	2015-01-06 08:20:11	14016166CF10A	2014-12-04		7	(F3)	Corrupt Public Servant	1	15001673MM20A	(M1)		2015-06-25	Trespass Other Struct/Conve				0					Risk of Recidivism	6	Medium	2014-12-11	Risk of Violence	9	High	2014-12-11	2015-05-17	2015-05-27	36	149
487	timothy ryan	timothy	ryan	2014-12-11	Male	1963-04-02	53	Greater than 45	Caucasian	0	6	0	0	36	-7	2014-12-04 08:28:26	2015-01-06 08:20:11	14016166CF10A	2014-12-04		7	(F3)	Corrupt Public Servant	1	15001673MM20A	(M1)		2015-06-25	Trespass Other Struct/Conve				0					Risk of Recidivism	6	Medium	2014-12-11	Risk of Violence	9	High	2014-12-11	2015-05-17	2015-05-27	36	167
488	jay gamlin	jay	gamlin	2014-11-04	Male	1979-11-24	36	25 - 45	Caucasian	0	1	0	0	0	0	2014-11-04 04:56:30	2014-11-04 09:07:30	14040707MU10A	2014-11-04		0	(M1)	Driving Under The Influence	0									0					Risk of Recidivism	1	Low	2014-11-04	Risk of Violence	1	Low	2014-11-04	2014-11-04	2014-11-04	0	0
489	michael rosa	michael	rosa	2013-10-04	Male	1988-04-15	28	25 - 45	Caucasian	0	3	0	0	2	0	2013-10-04 01:55:36	2013-10-05 07:07:26	13018910MM10A	2013-10-03		1	(M1)	Battery	1	14009686TC30A	(M2)		2014-01-19	Driving License Suspended				1	14017790MM10A	(M1)	2014-11-27	Battery	Risk of Recidivism	3	Low	2013-10-04	Risk of Violence	4	Low	2013-10-04	2013-10-04	2013-10-05	2	1
491	andres castilo	andres	castilo	2014-09-04	Male	1969-07-23	46	Greater than 45	Hispanic	0	1	0	0	1	-27	2014-08-08 12:19:10	2014-08-08 08:53:57	14010787CF10A	2014-08-07		28	(F3)	Possession of Cocaine	0									0					Risk of Recidivism	1	Low	2014-09-04	Risk of Violence	1	Low	2014-09-04	2014-08-08	2014-08-08	1	0
492	jeanherard jeanjules	jeanherard	jeanjules	2014-08-07	Male	1994-09-18	21	Less than 25	Other	0	4	0	0	0	0	2014-08-07 01:25:39	2014-08-08 04:35:44	14010786CF10A	2014-08-07		0	(F3)	Tampering With Physical Evidence	0									0					Risk of Recidivism	4	Low	2014-08-07	Risk of Violence	5	Medium	2014-08-07	2014-08-07	2014-08-08	0	1
493	michael peter	michael	peter	2013-03-13	Male	1971-01-06	45	Greater than 45	African-American	0	1	0	0	1				13003680CF10A	2013-03-12		1	(F2)	Crim Use of Personal ID Info	0									0					Risk of Recidivism	1	Low	2013-03-13	Risk of Violence	1	Low	2013-03-13			1	0
494	carlos vasquez	carlos	vasquez	2013-08-02	Male	1995-01-17	21	Less than 25	Hispanic	0	5	1	0	3	-22	2013-07-11 04:30:33	2013-08-02 06:07:24	13009721CF10A	2013-07-11		22	(F3)	Grand Theft in the 3rd Degree	1	15011166MM10A	(M1)		2015-10-24	Possess Cannabis/20 Grams Or Less				0					Risk of Recidivism	5	Medium	2013-08-02	Risk of Violence	6	Medium	2013-08-02	2014-12-16	2015-01-09	3	0
494	carlos vasquez	carlos	vasquez	2013-08-02	Male	1995-01-17	21	Less than 25	Hispanic	0	5	1	0	3	-22	2013-07-11 04:30:33	2013-08-02 06:07:24	13009721CF10A	2013-07-11		22	(F3)	Grand Theft in the 3rd Degree	1	15011166MM10A	(M1)		2015-10-24	Possess Cannabis/20 Grams Or Less				0					Risk of Recidivism	5	Medium	2013-08-02	Risk of Violence	6	Medium	2013-08-02	2014-12-16	2015-01-09	3	525
495	kia rodriquez	kia	rodriquez	2013-05-06	Female	1979-07-02	36	25 - 45	African-American	0	7	0	0	0	-1	2013-05-05 08:31:15	2013-05-17 08:35:57	13006433CF10A	2013-05-05		1	(F2)	Aggrav Battery w/Deadly Weapon	0									0					Risk of Recidivism	7	Medium	2013-05-06	Risk of Violence	5	Medium	2013-05-06	2013-05-05	2013-05-17	0	11
496	jodie sena	jodie	sena	2013-01-11	Female	1991-01-26	25	25 - 45	Caucasian	0	4	0	0	2	-2	2013-01-09 08:33:15	2013-01-10 09:40:18	13000518MM10A	2013-01-09		2	(M2)	Petit Theft	1	13007257CF10A	(F3)	0	2013-05-21	Possession of Cocaine	2013-05-21	2013-07-13		0					Risk of Recidivism	4	Low	2013-01-11	Risk of Violence	4	Low	2013-01-11	2013-03-06	2013-03-15	2	0
496	jodie sena	jodie	sena	2013-01-11	Female	1991-01-26	25	25 - 45	Caucasian	0	4	0	0	2	-2	2013-01-09 08:33:15	2013-01-10 09:40:18	13000518MM10A	2013-01-09		2	(M2)	Petit Theft	1	13007257CF10A	(F3)	0	2013-05-21	Possession of Cocaine	2013-05-21	2013-07-13		0					Risk of Recidivism	4	Low	2013-01-11	Risk of Violence	4	Low	2013-01-11	2013-05-21	2013-07-13	2	63
497	helen carrillo	helen	carrillo	2013-04-04	Female	1992-06-09	23	Less than 25	Hispanic	0	3	0	0	1	0	2013-04-04 01:13:56	2013-04-04 11:28:44	13006418MM10A	2013-04-03		1	(M2)	Operating W/O Valid License	1	15022411TC10A	(M2)	0	2015-07-07	Operating W/O Valid License	2015-07-07	2015-07-17		0					Risk of Recidivism	3	Low	2013-04-04	Risk of Violence	4	Low	2013-04-04	2015-07-07	2015-07-17	1	0
498	roberto carrillo	roberto	carrillo	2014-06-22	Male	1961-08-27	54	Greater than 45	Hispanic	0	1	0	0	2	-1	2014-06-21 04:00:03	2014-07-24 09:43:31	14008559CF10A	2014-06-21		1	(F3)	Felony Battery	0									0					Risk of Recidivism	1	Low	2014-06-22	Risk of Violence	1	Low	2014-06-22	2014-06-21	2014-07-24	2	32
499	justin knoll	justin	knoll	2014-03-03	Male	1988-02-24	28	25 - 45	Caucasian	0	5	0	0	1	-4	2014-02-27 04:28:02	2014-02-28 08:49:55	14002778CF10A	2014-02-27		4	(F3)	Pos Cannabis W/Intent Sel/Del	0									0					Risk of Recidivism	5	Medium	2014-03-03	Risk of Violence	3	Low	2014-03-03	2014-07-16	2014-07-17	1	0
499	justin knoll	justin	knoll	2014-03-03	Male	1988-02-24	28	25 - 45	Caucasian	0	5	0	0	1	-4	2014-02-27 04:28:02	2014-02-28 08:49:55	14002778CF10A	2014-02-27		4	(F3)	Pos Cannabis W/Intent Sel/Del	0									0					Risk of Recidivism	5	Medium	2014-03-03	Risk of Violence	3	Low	2014-03-03	2014-07-16	2014-07-17	1	136
500	calvin rogers	calvin	rogers	2013-04-25	Female	1995-02-11	21	Less than 25	African-American	0	8	0	0	0	-1	2013-04-24 04:54:25	2013-04-25 09:10:00	13005881CF10A	2013-04-24		1	(F3)	Robbery Sudd Snatch No Weapon	1	14001002MM10A	(M2)	0	2014-01-21	Mandatory Susp Possess Alcohol	2014-01-21	2014-01-21		0					Risk of Recidivism	8	High	2013-04-25	Risk of Violence	7	Medium	2013-04-25	2014-01-21	2014-01-21	0	0
500	calvin rogers	calvin	rogers	2013-04-25	Female	1995-02-11	21	Less than 25	African-American	0	8	0	0	0	-1	2013-04-24 04:54:25	2013-04-25 09:10:00	13005881CF10A	2013-04-24		1	(F3)	Robbery Sudd Snatch No Weapon	1	14001002MM10A	(M2)	0	2014-01-21	Mandatory Susp Possess Alcohol	2014-01-21	2014-01-21		0					Risk of Recidivism	8	High	2013-04-25	Risk of Violence	7	Medium	2013-04-25	2014-01-21	2014-01-21	0	271
501	derek huffman	derek	huffman	2013-12-23	Male	1979-05-31	36	25 - 45	Caucasian	0	3	0	0	0	-1	2013-12-22 08:25:20	2013-12-23 01:09:26	13023661MM10A	2013-12-22		1	(M1)	Viol Injunct Domestic Violence	0									0					Risk of Recidivism	3	Low	2013-12-23	Risk of Violence	3	Low	2013-12-23	2013-12-22	2013-12-23	0	0
502	theronardo williams	theronardo	williams	2014-03-13	Male	1992-04-02	24	Less than 25	African-American	0	3	0	0	0	-1	2014-03-12 07:36:15	2014-03-13 01:26:58	14003529CF10A	2014-03-12		1	(F3)	Grand Theft in the 3rd Degree	0									0					Risk of Recidivism	3	Low	2014-03-13	Risk of Violence	4	Low	2014-03-13	2014-03-12	2014-03-13	0	0
503	elliott little	elliott	little	2013-09-06	Male	1988-02-26	28	25 - 45	African-American	0	6	0	0	3	206	2014-03-31 09:18:42	2014-05-02 09:40:25	10005511CF10A		2011-04-28	862	(F3)	arrest case no charge	1	14012559TC10A	(M2)	0	2014-03-31	Operating W/O Valid License	2014-03-31	2014-05-02		0					Risk of Recidivism	6	Medium	2013-09-06	Risk of Violence	4	Low	2013-09-06	2014-03-31	2014-05-02	3	0
504	christian atkinson	christian	atkinson	2014-01-24	Male	1986-02-25	30	25 - 45	Other	0	2	0	0	1	-1	2014-01-23 10:49:49	2014-01-24 01:36:58	11020261CF10A		2014-01-23	1	(F3)	arrest case no charge	1	14052588TC30A	(M2)		2014-06-11	Operating W/O Valid License				0					Risk of Recidivism	2	Low	2014-01-24	Risk of Violence	2	Low	2014-01-24	2014-01-23	2014-01-24	1	0
505	tracee chang-scott	tracee	chang-scott	2014-03-02	Male	1986-05-02	29	25 - 45	African-American	0	1	0	0	0	-1	2014-03-01 02:42:35	2014-03-02 08:38:51	14002914CF10A	2014-03-01		1	(F3)	Aggravated Assault W/Dead Weap	0									0					Risk of Recidivism	1	Low	2014-03-02	Risk of Violence	2	Low	2014-03-02	2014-03-01	2014-03-02	0	0
506	jeremy finklin	jeremy	finklin	2014-07-23	Male	1994-02-22	22	Less than 25	African-American	0	8	0	0	2	-113	2014-04-01 08:10:13	2014-05-19 09:18:22	14009981CF10A		2014-07-22	1	(F2)	arrest case no charge	0									0					Risk of Recidivism	8	High	2014-07-23	Risk of Violence	9	High	2014-07-23	2014-04-01	2014-05-19	2	0
507	paul jean	paul	jean	2014-11-06	Male	1985-01-20	31	25 - 45	African-American	0	9	0	0	8	271	2015-08-04 01:43:42	2015-08-04 07:57:45	12011995CF10A		2012-09-27	770	(F2)	arrest case no charge	0									0					Risk of Recidivism	9	High	2014-11-06	Risk of Violence	5	Medium	2014-11-06	2015-08-04	2015-08-04	8	0
507	paul jean	paul	jean	2014-11-06	Male	1985-01-20	31	25 - 45	African-American	0	9	0	0	8	271	2015-08-04 01:43:42	2015-08-04 07:57:45	12011995CF10A		2012-09-27	770	(F2)	arrest case no charge	0									0					Risk of Recidivism	9	High	2014-11-06	Risk of Violence	5	Medium	2014-11-06	2015-08-04	2015-08-04	8	271
508	jeronald fiddeman	jeronald	fiddeman	2014-04-05	Male	1977-07-29	38	25 - 45	African-American	0	9	0	0	2				11004048CF10A	2011-03-05		1127	(F3)	Possession of Cocaine	0									0					Risk of Recidivism	9	High	2014-04-05	Risk of Violence	5	Medium	2014-04-05	2015-10-08	2016-03-12	2	0
508	jeronald fiddeman	jeronald	fiddeman	2014-04-05	Male	1977-07-29	38	25 - 45	African-American	0	9	0	0	2				11004048CF10A	2011-03-05		1127	(F3)	Possession of Cocaine	0									0					Risk of Recidivism	9	High	2014-04-05	Risk of Violence	5	Medium	2014-04-05	2015-10-08	2016-03-12	2	707
509	marilyn cuello	marilyn	cuello	2013-03-22	Female	1986-04-16	30	25 - 45	Caucasian	0	6	0	0	0	0	2013-03-22 12:02:23	2013-03-26 09:46:14	13005576MM10A	2013-03-21		1	(M1)	Battery	0									0					Risk of Recidivism	6	Medium	2013-03-22	Risk of Violence	2	Low	2013-03-22	2013-03-22	2013-03-26	0	4
510	rafael magana	rafael	magana	2013-12-27	Male	1964-05-15	51	Greater than 45	Hispanic	0	1	0	0	1	-1	2013-12-26 04:15:54	2013-12-27 07:50:46	13023827MM10A	2013-12-25		2	(M2)	Assault	0									0					Risk of Recidivism	1	Low	2013-12-27	Risk of Violence	1	Low	2013-12-27	2013-12-26	2013-12-27	1	0
511	hudson silva	hudson	silva	2013-12-05	Male	1983-03-08	33	25 - 45	Other	0	1	0	0	3	-94	2013-09-02 03:40:45	2013-09-05 04:28:45	13012376CF10A	2013-09-02		94	(F3)	Felony Battery (Dom Strang)	0									0					Risk of Recidivism	1	Low	2013-12-05	Risk of Violence	1	Low	2013-12-05	2013-09-02	2013-09-05	3	0
512	samantha brown	samantha	brown	2013-12-18	Female	1990-08-10	25	25 - 45	African-American	0	6	0	0	2	-86	2013-09-23 08:31:28	2013-09-25 07:03:03	13013459CF10A		2013-09-23	86	(F3)	arrest case no charge	0									0					Risk of Recidivism	6	Medium	2013-12-18	Risk of Violence	5	Medium	2013-12-18	2015-06-09	2015-07-06	2	0
512	samantha brown	samantha	brown	2013-12-18	Female	1990-08-10	25	25 - 45	African-American	0	6	0	0	2	-86	2013-09-23 08:31:28	2013-09-25 07:03:03	13013459CF10A		2013-09-23	86	(F3)	arrest case no charge	0									0					Risk of Recidivism	6	Medium	2013-12-18	Risk of Violence	5	Medium	2013-12-18	2015-06-09	2015-07-06	2	565
515	anthony mclemore	anthony	mclemore	2014-06-14	Male	1978-08-10	37	25 - 45	African-American	0	2	0	0	4	-1	2014-06-13 03:42:59	2014-06-14 07:58:55	14009378MM10A	2014-06-13		1	(M1)	Battery	0									0					Risk of Recidivism	2	Low	2014-06-14	Risk of Violence	2	Low	2014-06-14	2014-06-13	2014-06-14	4	0
516	frederick pinkney	frederick	pinkney	2013-02-16	Male	1983-09-14	32	25 - 45	African-American	0	9	1	0	12	-1	2013-02-15 12:13:14	2013-02-17 01:27:01	13002355CF10A		2013-02-15	1	(F3)	arrest case no charge	1	14007605TC10A	(M2)		2014-02-12	Driving License Suspended				1	15000254CF10A	(F2)	2015-01-06	Robbery / No Weapon	Risk of Recidivism	9	High	2013-02-16	Risk of Violence	7	Medium	2013-02-16	2013-02-15	2013-02-17	12	1
517	quon gwynn	quon	gwynn	2014-01-31	Male	1992-06-15	23	Less than 25	African-American	0	6	0	1	1	0	2014-01-31 01:04:24	2014-02-01 03:16:14	14001353CF10A	2014-01-30		1	(F3)	Grand Theft in the 3rd Degree	0									0					Risk of Recidivism	6	Medium	2014-01-31	Risk of Violence	5	Medium	2014-01-31	2014-01-31	2014-02-01	1	1
518	lee humphrey	lee	humphrey	2013-03-25	Male	1968-08-31	47	Greater than 45	African-American	0	3	0	0	3	0	2013-03-25 03:26:29	2013-03-25 07:55:24	13004314CF10A	2013-03-25		0	(F3)	Possession Burglary Tools	0									0					Risk of Recidivism	3	Low	2013-03-25	Risk of Violence	2	Low	2013-03-25	2013-06-29	2013-06-30	3	0
518	lee humphrey	lee	humphrey	2013-03-25	Male	1968-08-31	47	Greater than 45	African-American	0	3	0	0	3	0	2013-03-25 03:26:29	2013-03-25 07:55:24	13004314CF10A	2013-03-25		0	(F3)	Possession Burglary Tools	0									0					Risk of Recidivism	3	Low	2013-03-25	Risk of Violence	2	Low	2013-03-25	2013-06-29	2013-06-30	3	97
520	karen friday	karen	friday	2014-05-21	Female	1974-08-19	41	25 - 45	African-American	0	6	0	0	6				11004229MM10A	2011-02-20		1186	(M1)	Viol Injunct Domestic Violence	0									0					Risk of Recidivism	6	Medium	2014-05-21	Risk of Violence	3	Low	2014-05-21			6	0
521	angela fuller	angela	fuller	2013-09-26	Female	1983-12-07	32	25 - 45	Hispanic	0	3	0	0	1	-80	2013-07-08 09:28:30	2013-07-10 10:28:19	13009535CF10A	2013-07-08		80	(F3)	Possession of Cocaine	1	14052956TC40A	(M2)		2014-07-25	Driving License Suspended				0					Risk of Recidivism	3	Low	2013-09-26	Risk of Violence	3	Low	2013-09-26	2013-07-08	2013-07-10	1	0
522	stephen harmon	stephen	harmon	2014-02-25	Male	1978-07-11	37	25 - 45	Caucasian	0	1	0	0	0	-1	2014-02-24 05:11:22	2014-03-15 05:53:52	14002620CF10A	2014-02-25		0	(F3)	Forging Bank Bills/Promis Note	0									0					Risk of Recidivism	1	Low	2014-02-25	Risk of Violence	1	Low	2014-02-25	2015-04-13	2015-04-15	0	18
522	stephen harmon	stephen	harmon	2014-02-25	Male	1978-07-11	37	25 - 45	Caucasian	0	1	0	0	0	-1	2014-02-24 05:11:22	2014-03-15 05:53:52	14002620CF10A	2014-02-25		0	(F3)	Forging Bank Bills/Promis Note	0									0					Risk of Recidivism	1	Low	2014-02-25	Risk of Violence	1	Low	2014-02-25	2015-11-04	2015-11-09	0	414
522	stephen harmon	stephen	harmon	2014-02-25	Male	1978-07-11	37	25 - 45	Caucasian	0	1	0	0	0	-1	2014-02-24 05:11:22	2014-03-15 05:53:52	14002620CF10A	2014-02-25		0	(F3)	Forging Bank Bills/Promis Note	0									0					Risk of Recidivism	1	Low	2014-02-25	Risk of Violence	1	Low	2014-02-25	2015-11-04	2015-11-09	0	622
523	jeremy gassett	jeremy	gassett	2014-09-13	Male	1996-08-23	19	Less than 25	African-American	0	10	2	0	2	-1	2014-09-12 06:18:51	2014-09-13 10:54:20	14012419CF10A	2014-09-12		1	(F3)	Poss Pyrrolidinovalerophenone	1	15012033MM10A	(M1)		2015-11-18	Unlaw Use False Name/Identity				0					Risk of Recidivism	10	High	2014-09-13	Risk of Violence	9	High	2014-09-13	2014-12-05	2014-12-06	2	0
523	jeremy gassett	jeremy	gassett	2014-09-13	Male	1996-08-23	19	Less than 25	African-American	0	10	2	0	2	-1	2014-09-12 06:18:51	2014-09-13 10:54:20	14012419CF10A	2014-09-12		1	(F3)	Poss Pyrrolidinovalerophenone	1	15012033MM10A	(M1)		2015-11-18	Unlaw Use False Name/Identity				0					Risk of Recidivism	10	High	2014-09-13	Risk of Violence	9	High	2014-09-13	2015-01-19	2015-01-22	2	84
523	jeremy gassett	jeremy	gassett	2014-09-13	Male	1996-08-23	19	Less than 25	African-American	0	10	2	0	2	-1	2014-09-12 06:18:51	2014-09-13 10:54:20	14012419CF10A	2014-09-12		1	(F3)	Poss Pyrrolidinovalerophenone	1	15012033MM10A	(M1)		2015-11-18	Unlaw Use False Name/Identity				0					Risk of Recidivism	10	High	2014-09-13	Risk of Violence	9	High	2014-09-13	2015-01-19	2015-01-22	2	131
524	angel bravo	angel	bravo	2014-02-01	Male	1988-06-11	27	25 - 45	Hispanic	0	8	0	0	0	-1	2014-01-31 02:14:52	2014-02-02 04:25:26	14001734MM10A	2014-01-31		1	(M1)	Battery	0									0					Risk of Recidivism	8	High	2014-02-01	Risk of Violence	6	Medium	2014-02-01	2014-01-31	2014-02-02	0	1
525	sarada mittapalli	sarada	mittapalli	2013-11-27	Male	1976-07-29	39	25 - 45	Other	0	1	0	0	0	-1	2013-11-26 06:08:42	2013-11-27 02:09:15	13022234MM10A	2013-11-26		1	(M1)	Battery	0									0					Risk of Recidivism	1	Low	2013-11-27	Risk of Violence	1	Low	2013-11-27	2013-11-26	2013-11-27	0	0
526	kayli wagner	kayli	wagner	2013-02-21	Female	1994-10-07	21	Less than 25	Caucasian	0	6	0	2	0	0	2013-02-21 05:16:18	2013-02-21 09:22:51	13002684CF10A	2013-02-21		0	(F3)	Possession of Cocaine	0									0					Risk of Recidivism	6	Medium	2013-02-21	Risk of Violence	8	High	2013-02-21	2013-02-21	2013-02-21	0	0
527	barry rabinowitz	barry	rabinowitz	2013-01-31	Male	1946-11-16	69	Greater than 45	Caucasian	0	1	0	0	0	-1	2013-01-30 08:36:13	2013-01-31 07:20:04	13001514CF10A	2013-01-30		1	(M2)	Aggravated Assault W/dead Weap	0									0					Risk of Recidivism	1	Low	2013-01-31	Risk of Violence	1	Low	2013-01-31	2013-01-30	2013-01-31	0	0
528	louis paolino	louis	paolino	2014-05-01	Male	1980-01-20	36	25 - 45	Caucasian	0	3	0	0	3	-106	2014-01-15 09:00:19	2014-01-22 06:57:45	13006581CF10A		2014-01-15	106	(F3)	arrest case no charge	0									0					Risk of Recidivism	3	Low	2014-05-01	Risk of Violence	3	Low	2014-05-01	2015-05-13	2015-05-13	3	0
528	louis paolino	louis	paolino	2014-05-01	Male	1980-01-20	36	25 - 45	Caucasian	0	3	0	0	3	-106	2014-01-15 09:00:19	2014-01-22 06:57:45	13006581CF10A		2014-01-15	106	(F3)	arrest case no charge	0									0					Risk of Recidivism	3	Low	2014-05-01	Risk of Violence	3	Low	2014-05-01	2015-08-18	2015-09-18	3	377
528	louis paolino	louis	paolino	2014-05-01	Male	1980-01-20	36	25 - 45	Caucasian	0	3	0	0	3	-106	2014-01-15 09:00:19	2014-01-22 06:57:45	13006581CF10A		2014-01-15	106	(F3)	arrest case no charge	0									0					Risk of Recidivism	3	Low	2014-05-01	Risk of Violence	3	Low	2014-05-01	2015-08-18	2015-09-18	3	505
530	robert yamin	robert	yamin	2013-11-07	Male	1994-06-29	21	Less than 25	Caucasian	0	6	0	0	2	-1	2013-11-06 07:01:58	2013-11-08 09:11:46	13015487CF10A		2013-11-06	1	(F3)	arrest case no charge	0									0					Risk of Recidivism	6	Medium	2013-11-07	Risk of Violence	6	Medium	2013-11-07	2015-06-07	2015-06-10	2	1
530	robert yamin	robert	yamin	2013-11-07	Male	1994-06-29	21	Less than 25	Caucasian	0	6	0	0	2	-1	2013-11-06 07:01:58	2013-11-08 09:11:46	13015487CF10A		2013-11-06	1	(F3)	arrest case no charge	0									0					Risk of Recidivism	6	Medium	2013-11-07	Risk of Violence	6	Medium	2013-11-07	2015-06-07	2015-06-10	2	580
531	dijohn frazier	dijohn	frazier	2013-10-07	Male	1990-02-05	26	25 - 45	African-American	0	10	0	1	6	0	2013-10-07 12:35:37	2013-10-11 06:19:26	13019083MM10A	2013-10-07		0	(M1)	Battery	1	14008009MM10A	(M1)	0	2014-05-16	Viol Pretrial Release Dom Viol	2014-05-16	2014-05-18		0					Risk of Recidivism	10	High	2013-10-07	Risk of Violence	10	High	2013-10-07	2014-05-16	2014-05-18	6	4
532	ryan carr	ryan	carr	2013-12-09	Male	1994-01-24	22	Less than 25	Caucasian	0	4	0	0	0	-2	2013-12-07 01:04:19	2013-12-07 02:19:36	13016886CF10A	2013-12-06		3	(F3)	Possession of Cocaine	0									0					Risk of Recidivism	4	Low	2013-12-09	Risk of Violence	5	Medium	2013-12-09	2013-12-07	2013-12-07	0	0
533	aajah herrington	aajah	herrington	2013-04-24	Female	1992-06-02	23	Less than 25	African-American	0	5	0	0	0	-1	2013-04-23 09:37:13	2013-04-24 01:57:01	13005832CF10A	2013-04-23		1	(F3)	Driving While License Revoked	1	14007863MM10A	(M1)	0	2014-05-13	Extradition/Defendants	2014-05-13	2014-06-05		0					Risk of Recidivism	5	Medium	2013-04-24	Risk of Violence	5	Medium	2013-04-24	2014-05-13	2014-06-05	0	0
534	chavalier johnson	chavalier	johnson	2014-01-23	Male	1996-04-09	20	Less than 25	African-American	1	7	0	0	1	-48	2013-12-06 12:43:53	2013-12-31 10:30:11	13016367CF10A		2013-12-06	48	(F3)	arrest case no charge	0									0					Risk of Recidivism	7	Medium	2014-01-23	Risk of Violence	10	High	2014-01-23	2014-04-04	2014-11-14	1	0
534	chavalier johnson	chavalier	johnson	2014-01-23	Male	1996-04-09	20	Less than 25	African-American	1	7	0	0	1	-48	2013-12-06 12:43:53	2013-12-31 10:30:11	13016367CF10A		2013-12-06	48	(F3)	arrest case no charge	0									0					Risk of Recidivism	7	Medium	2014-01-23	Risk of Violence	10	High	2014-01-23	2016-01-28	2016-04-14	1	295
534	chavalier johnson	chavalier	johnson	2014-01-23	Male	1996-04-09	20	Less than 25	African-American	1	7	0	0	1	-48	2013-12-06 12:43:53	2013-12-31 10:30:11	13016367CF10A		2013-12-06	48	(F3)	arrest case no charge	0									0					Risk of Recidivism	7	Medium	2014-01-23	Risk of Violence	10	High	2014-01-23	2016-01-28	2016-04-14	1	812
535	william picken	william	picken	2014-06-23	Male	1987-09-12	28	25 - 45	Caucasian	0	2	0	0	0	-2	2014-06-21 08:38:49	2014-06-22 08:32:43	14008552CF10A	2014-06-21		2	(F3)	Possession Of Heroin	0									0					Risk of Recidivism	2	Low	2014-06-23	Risk of Violence	2	Low	2014-06-23	2014-06-21	2014-06-22	0	0
536	kevin aumack	kevin	aumack	2014-06-01	Male	1971-03-10	45	Greater than 45	Caucasian	0	5	0	0	0	-1	2014-05-31 01:11:55	2014-06-01 08:30:09	14008685MM10A	2014-05-30		2	(M1)	Battery	0									0					Risk of Recidivism	5	Medium	2014-06-01	Risk of Violence	1	Low	2014-06-01	2014-05-31	2014-06-01	0	0
537	mitchell miller	mitchell	miller	2013-10-15	Male	1966-08-19	49	Greater than 45	African-American	0	5	0	0	3	0	2013-10-15 12:10:18	2013-10-19 05:47:48	13014372CF10A	2013-10-14		1	(F3)	Grand Theft (Motor Vehicle)	0									0					Risk of Recidivism	5	Medium	2013-10-15	Risk of Violence	4	Low	2013-10-15	2015-09-04	2015-09-09	3	4
537	mitchell miller	mitchell	miller	2013-10-15	Male	1966-08-19	49	Greater than 45	African-American	0	5	0	0	3	0	2013-10-15 12:10:18	2013-10-19 05:47:48	13014372CF10A	2013-10-14		1	(F3)	Grand Theft (Motor Vehicle)	0									0					Risk of Recidivism	5	Medium	2013-10-15	Risk of Violence	4	Low	2013-10-15	2016-03-17	2016-03-17	3	694
537	mitchell miller	mitchell	miller	2013-10-15	Male	1966-08-19	49	Greater than 45	African-American	0	5	0	0	3	0	2013-10-15 12:10:18	2013-10-19 05:47:48	13014372CF10A	2013-10-14		1	(F3)	Grand Theft (Motor Vehicle)	0									0					Risk of Recidivism	5	Medium	2013-10-15	Risk of Violence	4	Low	2013-10-15	2016-03-17	2016-03-17	3	884
538	andrew flowers	andrew	flowers	2013-01-30	Male	1986-10-24	29	25 - 45	African-American	0	4	0	1	2	-1	2013-01-29 11:52:49	2013-03-21 07:00:48	13002104MM10A	2013-01-29		1	(M1)	Battery	1	15004089CF10A	(F3)	0	2015-03-27	Possession of Cannabis	2015-03-27	2015-03-28		0					Risk of Recidivism	4	Low	2013-01-30	Risk of Violence	3	Low	2013-01-30	2015-03-27	2015-03-28	2	50
540	john cooper	john	cooper	2013-10-14	Female	1955-09-14	60	Greater than 45	Caucasian	0	1	0	0	0	-1	2013-10-13 05:34:29	2013-10-14 02:36:01	13019421MM10A	2013-10-13		1	(M1)	Battery	0									0					Risk of Recidivism	1	Low	2013-10-14	Risk of Violence	1	Low	2013-10-14	2013-10-13	2013-10-14	0	0
541	peticia curtis	peticia	curtis	2013-02-05	Female	1989-10-15	26	25 - 45	African-American	0	10	0	0	0										0									0					Risk of Recidivism	10	High	2013-02-05	Risk of Violence	10	High	2013-02-05	2013-03-30	2013-09-07	0	0
541	peticia curtis	peticia	curtis	2013-02-05	Female	1989-10-15	26	25 - 45	African-American	0	10	0	0	0										0									0					Risk of Recidivism	10	High	2013-02-05	Risk of Violence	10	High	2013-02-05	2013-03-30	2013-09-07	0	214
542	bernard augusme	bernard	augusme	2013-05-06	Male	1993-03-26	23	Less than 25	African-American	2	10	0	0	3	0	2013-05-06 02:04:06	2013-05-06 08:01:08	13006471CF10A	2013-05-05		1	(F3)	Poss3,4 Methylenedioxymethcath	1	14004691TC10A	(M2)		2013-12-27	Operating W/O Valid License				0					Risk of Recidivism	10	High	2013-05-06	Risk of Violence	10	High	2013-05-06	2014-06-21	2015-05-08	3	0
543	rudolfo francisco	rudolfo	francisco	2014-04-05	Male	1981-07-06	34	25 - 45	Hispanic	0	5	0	0	2	47	2014-05-22 09:37:00	2014-12-16 06:22:02	12020160MM10A		2013-07-08	271	(M1)	arrest case no charge	1	14007140CF10A	(F3)	0	2014-05-22	Stalking (Aggravated)	2014-05-22	2014-12-16		1	14007140CF10A	(F3)	2014-05-22	Stalking (Aggravated)	Risk of Recidivism	5	Medium	2014-04-05	Risk of Violence	2	Low	2014-04-05	2014-05-22	2014-12-16	2	0
544	james wheeler	james	wheeler	2014-06-22	Male	1986-01-16	30	25 - 45	Caucasian	0	1	0	0	0	-1	2014-06-21 02:34:36	2014-06-24 01:59:46	14009713MM10A	2014-06-20		2	(M1)	Battery	0									0					Risk of Recidivism	1	Low	2014-06-22	Risk of Violence	2	Low	2014-06-22	2014-06-21	2014-06-24	0	2
545	jamelia hutchinson	jamelia	hutchinson	2013-03-12	Female	1995-12-06	20	Less than 25	Other	1	4	0	0	1	-21	2013-02-19 08:48:32	2013-02-22 07:41:48	13002495CF10A		2013-02-19	21	(F1)	arrest case no charge	0									0					Risk of Recidivism	4	Low	2013-03-12	Risk of Violence	7	Medium	2013-03-12	2014-10-29	2015-01-26	1	0
545	jamelia hutchinson	jamelia	hutchinson	2013-03-12	Female	1995-12-06	20	Less than 25	Other	1	4	0	0	1	-21	2013-02-19 08:48:32	2013-02-22 07:41:48	13002495CF10A		2013-02-19	21	(F1)	arrest case no charge	0									0					Risk of Recidivism	4	Low	2013-03-12	Risk of Violence	7	Medium	2013-03-12	2014-10-29	2015-01-26	1	685
546	jose escobar	jose	escobar	2013-04-22	Male	1980-03-17	36	25 - 45	Hispanic	0	3	0	0	1	0	2013-04-22 02:33:46	2013-07-26 05:05:36	13005775CF10A	2013-04-21		1	(F3)	Felony/Driving Under Influence	0									0					Risk of Recidivism	3	Low	2013-04-22	Risk of Violence	2	Low	2013-04-22	2013-09-29	2013-09-29	1	95
546	jose escobar	jose	escobar	2013-04-22	Male	1980-03-17	36	25 - 45	Hispanic	0	3	0	0	1	0	2013-04-22 02:33:46	2013-07-26 05:05:36	13005775CF10A	2013-04-21		1	(F3)	Felony/Driving Under Influence	0									0					Risk of Recidivism	3	Low	2013-04-22	Risk of Violence	2	Low	2013-04-22	2013-09-29	2013-09-29	1	160
547	christopher loosier	christopher	loosier	2013-05-04	Male	1985-07-07	30	25 - 45	Caucasian	0	4	0	0	0	0	2013-05-04 12:45:31	2013-05-06 08:53:01	13006396CF10A	2013-05-03		1	(F3)	Possession of Cocaine	0									0					Risk of Recidivism	4	Low	2013-05-04	Risk of Violence	3	Low	2013-05-04	2013-05-04	2013-05-06	0	2
548	newton smith	newton	smith	2013-06-17	Male	1995-01-28	21	Less than 25	African-American	0	3	1	0	1	-1	2013-06-16 12:36:42	2013-06-16 07:01:42	13008471CF10A	2013-06-15		2	(F3)	Grand Theft in the 3rd Degree	1	16003711TC20A	(M2)		2016-01-20	Fail Register Vehicle				0					Risk of Recidivism	3	Low	2013-06-17	Risk of Violence	6	Medium	2013-06-17	2013-06-16	2013-06-16	1	0
549	torrance cooper	torrance	cooper	2014-11-12	Male	1981-08-22	34	25 - 45	African-American	1	8	0	0	11	-1	2014-11-11 11:22:34	2014-11-15 05:41:58	14016181MM10A	2014-11-11		1	(M1)	Battery	0									0					Risk of Recidivism	8	High	2014-11-12	Risk of Violence	4	Low	2014-11-12	2014-11-11	2014-11-15	11	3
550	marco mesa	marco	mesa	2014-04-09	Male	1991-02-07	25	25 - 45	Hispanic	0	7	0	0	1	-1	2014-04-08 12:50:59	2014-04-11 03:50:33	14004878CF10A	2014-04-08		1	(F3)	Burglary Conveyance Unoccup	0									0					Risk of Recidivism	7	Medium	2014-04-09	Risk of Violence	3	Low	2014-04-09	2014-04-08	2014-04-11	1	2
551	tevarris medlock	tevarris	medlock	2013-05-11	Male	1990-10-13	25	25 - 45	African-American	0	7	0	0	7	0	2013-05-11 02:55:47	2013-05-12 03:23:29	13006288CF10A		2013-05-11	0	(F2)	arrest case no charge	0									0					Risk of Recidivism	7	Medium	2013-05-11	Risk of Violence	6	Medium	2013-05-11	2013-10-21	2013-10-24	7	1
551	tevarris medlock	tevarris	medlock	2013-05-11	Male	1990-10-13	25	25 - 45	African-American	0	7	0	0	7	0	2013-05-11 02:55:47	2013-05-12 03:23:29	13006288CF10A		2013-05-11	0	(F2)	arrest case no charge	0									0					Risk of Recidivism	7	Medium	2013-05-11	Risk of Violence	6	Medium	2013-05-11	2013-10-24	2015-07-28	7	808
552	dylan bishop	dylan	bishop	2013-09-09	Male	1994-02-20	22	Less than 25	Caucasian	0	6	0	0	2	-1	2013-09-08 11:40:53	2013-09-09 07:52:09	13012691CF10A	2013-09-08		1	(M1)	Possess Cannabis/20 Grams Or Less	1	14020723TC10A	(M2)	0	2014-06-04	Susp Drivers Lic 1st Offense	2014-06-04	2014-06-11		0					Risk of Recidivism	6	Medium	2013-09-09	Risk of Violence	5	Medium	2013-09-09	2014-02-14	2014-02-16	2	0
552	dylan bishop	dylan	bishop	2013-09-09	Male	1994-02-20	22	Less than 25	Caucasian	0	6	0	0	2	-1	2013-09-08 11:40:53	2013-09-09 07:52:09	13012691CF10A	2013-09-08		1	(M1)	Possess Cannabis/20 Grams Or Less	1	14020723TC10A	(M2)	0	2014-06-04	Susp Drivers Lic 1st Offense	2014-06-04	2014-06-11		0					Risk of Recidivism	6	Medium	2013-09-09	Risk of Violence	5	Medium	2013-09-09	2014-06-04	2014-06-11	2	160
553	edward gelsey	edward	gelsey	2013-05-08	Male	1959-01-31	57	Greater than 45	African-American	0	8	0	0	18				08000963CF10A		2008-04-30	1834	(F3)	arrest case no charge	0									0					Risk of Recidivism	8	High	2013-05-08	Risk of Violence	7	Medium	2013-05-08	2002-08-20	2003-11-16	18	0
554	enrique deahora	enrique	deahora	2014-04-16	Male	1986-12-27	29	25 - 45	Caucasian	0	8	0	0	2	-1	2014-04-15 01:15:11	2014-04-16 08:37:28	14005280CF10A	2014-04-15		1	(M2)	Burglary Unoccupied Dwelling	0									0					Risk of Recidivism	8	High	2014-04-16	Risk of Violence	5	Medium	2014-04-16	2014-04-15	2014-04-16	2	0
555	dave clarke	dave	clarke	2014-04-09	Male	1979-08-15	36	25 - 45	African-American	0	1	0	0	1	-32	2014-03-08 01:09:53	2014-03-14 09:36:03	14003389CF10A		2014-03-08	32	(F3)	arrest case no charge	0									0					Risk of Recidivism	1	Low	2014-04-09	Risk of Violence	1	Low	2014-04-09	2014-03-08	2014-03-14	1	0
556	travoris brown	travoris	brown	2014-06-17	Male	1986-07-30	29	25 - 45	African-American	0	2	1	0	7	-24	2014-05-24 10:22:45	2014-05-25 08:11:36	14008363MM10A	2014-05-24		24	(M1)	Battery	0									0					Risk of Recidivism	2	Low	2014-06-17	Risk of Violence	4	Low	2014-06-17	2014-05-24	2014-05-25	7	0
557	tarell rolle	tarell	rolle	2013-10-22	Male	1995-04-12	21	Less than 25	African-American	0	9	0	0	4	-1	2013-10-21 06:36:46	2014-05-29 04:43:53	13013587CF10A		2013-10-22	0	(F3)	arrest case no charge	1	14009986CF10A	(M2)	1	2014-07-22	Prowling/Loitering	2014-07-23	2015-12-04		0					Risk of Recidivism	9	High	2013-10-22	Risk of Violence	6	Medium	2013-10-22	2013-10-21	2014-05-29	4	219
558	usbel ferdinand	usbel	ferdinand	2014-10-09	Male	1994-09-05	21	Less than 25	African-American	0	5	0	0	0	-1	2014-10-08 05:30:17	2014-10-20 09:06:11	14013589CF10A	2014-10-08		1	(F3)	Burglary Structure Unoccup	1	16001506CF10A	(F3)		2016-01-14	Grand Theft in the 3rd Degree				0					Risk of Recidivism	5	Medium	2014-10-09	Risk of Violence	6	Medium	2014-10-09	2015-02-05	2015-02-27	0	11
558	usbel ferdinand	usbel	ferdinand	2014-10-09	Male	1994-09-05	21	Less than 25	African-American	0	5	0	0	0	-1	2014-10-08 05:30:17	2014-10-20 09:06:11	14013589CF10A	2014-10-08		1	(F3)	Burglary Structure Unoccup	1	16001506CF10A	(F3)		2016-01-14	Grand Theft in the 3rd Degree				0					Risk of Recidivism	5	Medium	2014-10-09	Risk of Violence	6	Medium	2014-10-09	2015-02-05	2015-02-27	0	141
559	rodrick brown	rodrick	brown	2014-11-26	Male	1978-05-26	37	25 - 45	African-American	0	8	0	0	1				98017583CF10A	1998-08-27		5935	(F3)	Possession of Cocaine	0									0					Risk of Recidivism	8	High	2014-11-26	Risk of Violence	5	Medium	2014-11-26			1	0
560	john gish	john	gish	2014-01-17	Male	1982-04-30	33	25 - 45	Caucasian	0	1	0	0	3	-1	2014-01-16 12:58:14	2014-01-17 02:12:32	14000710CF10A	2014-01-16		1	(F3)	Possession of Cocaine	0									0					Risk of Recidivism	1	Low	2014-01-17	Risk of Violence	1	Low	2014-01-17	2014-04-22	2014-04-29	3	0
560	john gish	john	gish	2014-01-17	Male	1982-04-30	33	25 - 45	Caucasian	0	1	0	0	3	-1	2014-01-16 12:58:14	2014-01-17 02:12:32	14000710CF10A	2014-01-16		1	(F3)	Possession of Cocaine	0									0					Risk of Recidivism	1	Low	2014-01-17	Risk of Violence	1	Low	2014-01-17	2014-10-01	2014-10-08	3	102
560	john gish	john	gish	2014-01-17	Male	1982-04-30	33	25 - 45	Caucasian	0	1	0	0	3	-1	2014-01-16 12:58:14	2014-01-17 02:12:32	14000710CF10A	2014-01-16		1	(F3)	Possession of Cocaine	0									0					Risk of Recidivism	1	Low	2014-01-17	Risk of Violence	1	Low	2014-01-17	2015-01-20	2015-04-30	3	264
560	john gish	john	gish	2014-01-17	Male	1982-04-30	33	25 - 45	Caucasian	0	1	0	0	3	-1	2014-01-16 12:58:14	2014-01-17 02:12:32	14000710CF10A	2014-01-16		1	(F3)	Possession of Cocaine	0									0					Risk of Recidivism	1	Low	2014-01-17	Risk of Violence	1	Low	2014-01-17	2015-01-20	2015-04-30	3	468
561	jacob maynard	jacob	maynard	2014-02-04	Male	1982-01-17	34	25 - 45	Caucasian	0	1	0	0	1	0	2014-02-04 03:26:12	2014-02-04 08:29:18	14001956MM10A	2014-02-04		0	(M1)	Battery	0									0					Risk of Recidivism	1	Low	2014-02-04	Risk of Violence	1	Low	2014-02-04	2014-02-04	2014-02-04	1	0
562	liel sagee	liel	sagee	2014-07-13	Male	1988-12-13	27	25 - 45	Caucasian	0	2	0	0	0	-1	2014-07-12 07:43:36	2014-07-13 07:34:26	14025360MU10A	2014-07-12		1	(M1)	Driving Under The Influence	0									0					Risk of Recidivism	2	Low	2014-07-13	Risk of Violence	2	Low	2014-07-13	2014-07-12	2014-07-13	0	0
563	sandra codorniu	sandra	codorniu	2014-04-08	Female	1965-10-03	50	Greater than 45	Caucasian	0	1	0	0	1	-1	2014-04-07 11:40:45	2014-04-08 09:22:26	14005916MM10A	2014-04-07		1	(M1)	Battery	1	14010211MM10A	(M1)	0	2014-07-02	Viol Injunct Domestic Violence	2014-07-02	2014-07-22		0					Risk of Recidivism	1	Low	2014-04-08	Risk of Violence	1	Low	2014-04-08	2014-07-02	2014-07-22	1	0
564	barrington francis	barrington	francis	2014-06-01	Male	1989-06-19	26	25 - 45	African-American	0	3	0	0	1	-1	2014-05-31 12:14:13	2014-06-02 09:05:26	14004194CF10A		2014-05-31	1	(F3)	arrest case no charge	0									0					Risk of Recidivism	3	Low	2014-06-01	Risk of Violence	3	Low	2014-06-01	2014-05-31	2014-06-02	1	1
565	kenneth ray	kenneth	ray	2014-03-30	Male	1975-12-06	40	25 - 45	Caucasian	0	7	0	0	0	-1	2014-03-29 01:49:01	2014-04-06 08:39:14	14004424CF10A		2014-03-29	1	(F3)	arrest case no charge	1	14007240MM10A	(M1)	417	2014-05-01	Resist/Obstruct W/O Violence	2015-06-22	2015-07-26		0					Risk of Recidivism	7	Medium	2014-03-30	Risk of Violence	9	High	2014-03-30	2014-03-29	2014-04-06	0	7
566	nicholas neloms	nicholas	neloms	2014-02-25	Male	1990-10-14	25	25 - 45	African-American	0	8	0	0	7	-1	2014-02-24 04:26:33	2014-07-01 09:26:10	14002596CF10A	2014-02-24		1	(F3)	Tamper With Witness/Victim/CI	1	14003067MM20A	(M1)		2014-10-22	Possess Cannabis/20 Grams Or Less				0					Risk of Recidivism	8	High	2014-02-25	Risk of Violence	7	Medium	2014-02-25	2014-02-24	2014-07-01	7	126
567	daria demarinis	daria	demarinis	2013-12-22	Female	1962-11-08	53	Greater than 45	Caucasian	0	1	0	0	1	-1	2013-12-21 05:26:48	2013-12-22 01:41:48	13023548MM10A	2013-12-21		1	(M1)	Battery	0									0					Risk of Recidivism	1	Low	2013-12-22	Risk of Violence	1	Low	2013-12-22	2013-12-21	2013-12-22	1	0
569	stephanie williams	stephanie	williams	2013-12-14	Female	1991-10-11	24	Less than 25	African-American	0	4	0	0	0	-1	2013-12-13 03:13:07	2013-12-14 07:19:53	13017250CF10A	2013-12-13		1	(F3)	Aggravated Assault W/Dead Weap	0									0					Risk of Recidivism	4	Low	2013-12-14	Risk of Violence	4	Low	2013-12-14	2013-12-13	2013-12-14	0	0
571	david salcedo	david	salcedo	2014-09-20	Male	1977-01-06	39	25 - 45	Caucasian	0	4	0	0	2	0	2014-09-20 02:47:40	2014-09-21 07:21:34	14013970MM10A	2014-09-20		0	(M1)	Battery	0									0					Risk of Recidivism	4	Low	2014-09-20	Risk of Violence	4	Low	2014-09-20	2014-09-20	2014-09-21	2	1
572	frantz pointdujour	frantz	pointdujour	2013-06-12	Male	1974-01-10	42	25 - 45	African-American	0	1	0	0	1	-12	2013-05-31 04:44:14	2013-06-04 10:17:31	13007775CF10A		2013-05-30	13	(F2)	arrest case no charge	0									0					Risk of Recidivism	1	Low	2013-06-12	Risk of Violence	1	Low	2013-06-12	2013-05-31	2013-06-04	1	0
573	andre small	andre	small	2013-04-03	Male	1987-10-01	28	25 - 45	African-American	0	3	0	0	1	-1	2013-04-02 12:18:46	2013-04-04 07:54:22	13006354MM10A	2013-04-02		1	(M1)	Battery	0									0					Risk of Recidivism	3	Low	2013-04-03	Risk of Violence	3	Low	2013-04-03	2013-04-02	2013-04-04	1	1
574	brad dolph	brad	dolph	2014-02-28	Male	1992-03-13	24	Less than 25	Caucasian	0	4	0	0	1	-36	2014-01-23 01:33:51	2014-02-28 11:14:41	14001265MM10A	2014-01-22		37	(M2)	Disorderly Intoxication	0									0					Risk of Recidivism	4	Low	2014-02-28	Risk of Violence	4	Low	2014-02-28	2014-01-23	2014-02-28	1	0
575	ana ramosrivera	ana	ramosrivera	2014-08-15	Female	1993-02-23	23	Less than 25	Hispanic	0	4	0	0	0	-1	2014-08-14 12:32:56	2014-08-15 02:10:47	14012299MM10A	2014-08-14		1	(M1)	Battery	0									0					Risk of Recidivism	4	Low	2014-08-15	Risk of Violence	4	Low	2014-08-15	2014-08-14	2014-08-15	0	0
576	jarvis chatman	jarvis	chatman	2013-04-23	Male	1989-07-10	26	25 - 45	African-American	1	8	1	0	6	-1	2013-04-22 07:13:19	2013-04-23 07:33:30	13005774CF10A	2013-04-22		1	(F3)	Robbery / No Weapon	1	13069699TC20A	(M2)	445	2013-11-11	Driving License Suspended	2015-01-30	2015-03-02		0					Risk of Recidivism	8	High	2013-04-23	Risk of Violence	3	Low	2013-04-23	2015-09-22	2015-09-23	6	0
577	stephon lewis	stephon	lewis	2014-05-05	Male	1973-08-02	42	25 - 45	African-American	0	5	0	0	3	-1	2014-05-04 12:47:00	2014-07-31 05:05:50	14007391MM10A	2014-05-04		1	(M1)	Battery	0									0					Risk of Recidivism	5	Medium	2014-05-05	Risk of Violence	3	Low	2014-05-05	2015-06-25	2015-07-01	3	87
577	stephon lewis	stephon	lewis	2014-05-05	Male	1973-08-02	42	25 - 45	African-American	0	5	0	0	3	-1	2014-05-04 12:47:00	2014-07-31 05:05:50	14007391MM10A	2014-05-04		1	(M1)	Battery	0									0					Risk of Recidivism	5	Medium	2014-05-05	Risk of Violence	3	Low	2014-05-05	2015-06-25	2015-07-01	3	422
578	andres patino	andres	patino	2014-05-29	Male	1993-06-06	22	Less than 25	Caucasian	0	2	0	1	1	-22	2014-05-07 07:23:48	2014-05-07 08:52:51	14017477MU10A	2014-05-07		22	(M2)	Driving Under The Influence	0									0					Risk of Recidivism	2	Low	2014-05-29	Risk of Violence	4	Low	2014-05-29	2014-05-07	2014-05-07	1	0
579	damien waller	damien	waller	2013-02-05	Male	1994-02-10	22	Less than 25	African-American	0	9	0	0	4	-1	2013-02-04 02:09:53	2013-10-22 06:51:11	13001727CF10A	2013-02-04		1	(F3)	Grand Theft in the 3rd Degree	1	15000864CF10A	(F3)	0	2015-01-20	Robbery Sudd Snatch No Weapon	2015-01-20	2015-08-06		1	15000864CF10A	(F3)	2015-01-20	Robbery Sudd Snatch No Weapon	Risk of Recidivism	9	High	2013-02-05	Risk of Violence	9	High	2013-02-05	2015-01-20	2015-08-06	4	574
580	tyler gay	tyler	gay	2013-08-12	Male	1994-08-04	21	Less than 25	Caucasian	0	7	0	0	3	-8	2013-08-04 03:23:17	2013-08-10 01:02:53	13010743MM10A		2013-08-04	8	(M1)	arrest case no charge	0									0					Risk of Recidivism	7	Medium	2013-08-12	Risk of Violence	8	High	2013-08-12	2013-08-04	2013-08-10	3	0
581	douglas golding	douglas	golding	2013-03-17	Male	1978-05-02	37	25 - 45	African-American	0	9	0	0	23	-1	2013-03-16 06:38:51	2013-04-02 12:59:57	13003852CF10A	2013-03-16		1	(F3)	Battery on Law Enforc Officer	1	13006847MM10A	(M2)	0	2013-04-09	Tresspass Struct/Conveyance	2013-04-09	2013-06-18		0					Risk of Recidivism	9	High	2013-03-17	Risk of Violence	4	Low	2013-03-17	2013-04-09	2013-06-18	23	16
582	rosa horta	rosa	horta	2014-12-17	Male	1971-11-05	44	25 - 45	Caucasian	0	2	0	0	0	0	2014-12-17 05:28:58	2014-12-20 05:56:15	14045069MU10A	2014-12-17		0	(M1)	DUI Level 0.15 Or Minor In Veh	0									0					Risk of Recidivism	2	Low	2014-12-17	Risk of Violence	2	Low	2014-12-17	2014-12-17	2014-12-20	0	3
583	kenneth tharp	kenneth	tharp	2014-06-19	Male	1952-03-12	64	Greater than 45	Caucasian	0	9	0	0	13	-499	2013-02-05 10:56:12	2013-05-22 11:02:17	11019782CF10A		2013-02-05	499	(F3)	arrest case no charge	0									0					Risk of Recidivism	9	High	2014-06-19	Risk of Violence	2	Low	2014-06-19	2013-02-05	2013-05-22	13	0
584	devaughn bryan	devaughn	bryan	2013-05-16	Male	1980-04-29	35	25 - 45	African-American	0	5	0	0	2	-1	2013-05-15 04:19:38	2013-05-20 09:26:57	13006929CF10A	2013-05-15		1	(F3)	Possession of Cannabis	0									0					Risk of Recidivism	5	Medium	2013-05-16	Risk of Violence	5	Medium	2013-05-16	2013-05-15	2013-05-20	2	4
585	willie howard	willie	howard	2014-07-24	Male	1980-02-02	36	25 - 45	African-American	0	7	0	0	8	0	2014-07-24 02:49:09	2015-11-20 09:29:48	14010091CF10A	2014-07-24		0	(F3)	Possession of Ethylone	0									0					Risk of Recidivism	7	Medium	2014-07-24	Risk of Violence	4	Low	2014-07-24	2015-11-20	2015-11-20	8	484
586	marvin butler	marvin	butler	2013-08-07	Male	1962-12-30	53	Greater than 45	African-American	0	1	0	0	2	-1	2013-08-06 07:34:06	2013-08-07 01:05:18	13011035CF10A	2013-08-06		1	(F3)	Felony Driving While Lic Suspd	0									0					Risk of Recidivism	1	Low	2013-08-07	Risk of Violence	1	Low	2013-08-07	2013-08-06	2013-08-07	2	0
587	roger browne	roger	browne	2014-02-11	Male	1955-10-17	60	Greater than 45	African-American	0	1	0	0	1				07006838CF10A		2010-11-16	1183	(F1)	arrest case no charge	0									0					Risk of Recidivism	1	Low	2014-02-11	Risk of Violence	1	Low	2014-02-11	2010-06-22	2010-11-22	1	0
588	justin nowell	justin	nowell	2013-08-16	Male	1987-02-28	29	25 - 45	African-American	0	4	0	0	7	-1	2013-08-15 04:47:18	2013-08-16 10:21:01	13011483CF10A	2013-08-15		1	(F3)	Possession of Cocaine	1	16000435MM20A	(M1)		2016-01-28	Possess Cannabis/20 Grams Or Less				0					Risk of Recidivism	4	Low	2013-08-16	Risk of Violence	3	Low	2013-08-16	2015-09-28	2015-10-02	7	0
588	justin nowell	justin	nowell	2013-08-16	Male	1987-02-28	29	25 - 45	African-American	0	4	0	0	7	-1	2013-08-15 04:47:18	2013-08-16 10:21:01	13011483CF10A	2013-08-15		1	(F3)	Possession of Cocaine	1	16000435MM20A	(M1)		2016-01-28	Possess Cannabis/20 Grams Or Less				0					Risk of Recidivism	4	Low	2013-08-16	Risk of Violence	3	Low	2013-08-16	2015-09-28	2015-10-02	7	777
589	vonetta harris	vonetta	harris	2014-11-24	Female	1972-04-15	44	25 - 45	African-American	0	4	0	0	2				10026980MO10A		2012-01-27	1032	(MO3)	arrest case no charge	0									0					Risk of Recidivism	4	Low	2014-11-24	Risk of Violence	1	Low	2014-11-24			2	0
590	andrew calderaro	andrew	calderaro	2013-02-09	Male	1967-10-07	48	Greater than 45	Caucasian	1	8	0	0	23	-1	2013-02-08 07:54:34	2014-02-04 06:26:47	13002009CF10A	2013-02-08		1	(F3)	Felony Petit Theft	1	14017095CF10A	(F3)		2014-12-28	Felony Petit Theft				1	14017095CF10A	(M1)	2014-12-28	Battery	Risk of Recidivism	8	High	2013-02-09	Risk of Violence	5	Medium	2013-02-09	2014-02-04	2014-11-11	23	640
591	dominique gadson	dominique	gadson	2014-11-22	Male	1992-07-10	23	Less than 25	African-American	0	2	0	0	0	-1	2014-11-21 07:15:55	2014-11-22 07:47:56	14015686CF10A	2014-11-21		1	(F3)	Grand Theft in the 3rd Degree	0									0					Risk of Recidivism	2	Low	2014-11-22	Risk of Violence	4	Low	2014-11-22	2014-11-21	2014-11-22	0	0
592	eugenio peschard	eugenio	peschard	2013-12-13	Male	1968-03-19	48	Greater than 45	Hispanic	0	4	0	0	8	-1	2013-12-12 02:30:16	2014-06-05 06:44:57	13017342CF10A		2013-12-12	1	(F3)	arrest case no charge	0									0					Risk of Recidivism	4	Low	2013-12-13	Risk of Violence	1	Low	2013-12-13	2014-06-05	2020-01-01	8	840
594	evelyn rivera	evelyn	rivera	2013-03-25	Female	1964-04-17	52	Greater than 45	Caucasian	0	1	0	0	0	0	2013-03-25 04:21:35	2013-03-25 08:42:53	13005850MM10A	2013-03-24		1	(M1)	Battery	0									0					Risk of Recidivism	1	Low	2013-03-25	Risk of Violence	1	Low	2013-03-25	2013-03-25	2013-03-25	0	0
595	irvin cunningham	irvin	cunningham	2014-09-17	Male	1971-10-17	44	25 - 45	African-American	0	2	0	0	7	-1	2014-09-16 07:12:14	2014-09-17 01:19:50	14013788MM10A	2014-09-16		1	(M1)	Battery	0									0					Risk of Recidivism	2	Low	2014-09-17	Risk of Violence	3	Low	2014-09-17	2014-09-16	2014-09-17	7	0
596	alaa amireh	alaa	amireh	2014-07-07	Male	1988-03-25	28	25 - 45	Asian	0	5	0	0	1	-1	2014-07-06 12:06:33	2014-09-21 04:03:12	14009285CF10A	2014-07-06		1	(F3)	Poss Pyrrolidinovalerophenone	0									0					Risk of Recidivism	5	Medium	2014-07-07	Risk of Violence	2	Low	2014-07-07	2014-07-06	2014-09-21	1	76
597	ronald deliard	ronald	deliard	2013-04-16	Male	1988-10-10	27	25 - 45	African-American	0	8	0	0	12	-1	2013-04-15 05:42:56	2013-05-17 04:23:57	13005396CF10A	2013-04-15		1	(F3)	Driving While License Revoked	1	14005031MM10A	(M1)	0	2014-03-23	Resist/Obstruct W/O Violence	2014-03-23	2014-05-08		0					Risk of Recidivism	8	High	2013-04-16	Risk of Violence	5	Medium	2013-04-16	2014-03-23	2014-05-08	12	31
598	willie wilson	willie	wilson	2013-02-13	Male	1987-09-14	28	25 - 45	African-American	0	9	0	0	5	0	2013-02-13 02:14:41	2013-04-05 08:12:59	12002931CF10A		2013-02-13	0	(F3)	arrest case no charge	1	15026130TC10A	(M2)	0	2015-09-22	Operating W/O Valid License	2015-09-22	2015-10-07		0					Risk of Recidivism	9	High	2013-02-13	Risk of Violence	6	Medium	2013-02-13	2015-09-22	2015-10-07	5	51
599	daniel campos	daniel	campos	2013-12-22	Male	1982-07-02	33	25 - 45	Caucasian	0	3	0	0	3	0	2013-12-22 01:14:52	2013-12-22 07:48:32	13023564MM10A	2013-12-21		1	(M1)	Battery	0									0					Risk of Recidivism	3	Low	2013-12-22	Risk of Violence	1	Low	2013-12-22	2013-12-22	2013-12-22	3	0
600	jessica soto	jessica	soto	2013-04-05	Female	1988-03-02	28	25 - 45	Hispanic	0	2	0	0	0	-1	2013-04-04 03:19:29	2013-04-06 12:28:11	13004844CF10A		2013-04-04	1	(F7)	arrest case no charge	0									0					Risk of Recidivism	2	Low	2013-04-05	Risk of Violence	2	Low	2013-04-05	2013-04-04	2013-04-06	0	1
601	joel valli	joel	valli	2014-05-08	Male	1969-03-25	47	Greater than 45	Caucasian	0	10	0	0	5	-312	2013-06-30 08:26:21	2014-04-17 10:54:00	13009201CF10A	2013-06-30		312	(F3)	Possession of Cocaine	1	15014318CF10A	(F3)	185	2015-05-06	False Verif Ownership Pawn Shp	2015-11-07	2015-11-11		0					Risk of Recidivism	10	High	2014-05-08	Risk of Violence	6	Medium	2014-05-08	2015-11-07	2015-11-11	5	0
602	maurice knight	maurice	knight	2013-02-01	Male	1979-05-06	36	25 - 45	African-American	0	7	0	0	14	-1	2013-01-31 10:14:56	2013-02-01 08:48:31	13001573CF10A	2013-01-31		1	(F2)	Throw Deadly Missile Into Veh	1	13002602CF10A	(M1)	0	2013-02-20	Possess Cannabis/20 Grams Or Less	2013-02-20	2013-02-21		0					Risk of Recidivism	7	Medium	2013-02-01	Risk of Violence	3	Low	2013-02-01	2013-02-20	2013-02-21	14	0
603	christopher larmond	christopher	larmond	2013-04-05	Male	1987-04-09	29	25 - 45	African-American	1	5	0	0	2	-1	2013-04-04 11:24:09	2013-04-06 08:01:53	13004855CF10A	2013-04-04		1	(F2)	Aggravated Battery / Pregnant	0									0					Risk of Recidivism	5	Medium	2013-04-05	Risk of Violence	5	Medium	2013-04-05	2013-04-04	2013-04-06	2	1
604	devaughn brown	devaughn	brown	2013-01-01	Male	1993-07-25	22	Less than 25	African-American	0	9	0	1	0	0	2013-01-01 01:31:55	2013-01-22 09:01:52	13000048MM10A	2013-01-01		0	(M1)	Unlaw Use False Name/Identity	1	15000148MM10A	(M2)	0	2015-01-04	Petit Theft	2015-01-04	2015-01-08		0					Risk of Recidivism	9	High	2013-01-01	Risk of Violence	7	Medium	2013-01-01	2013-12-30	2014-01-10	0	21
604	devaughn brown	devaughn	brown	2013-01-01	Male	1993-07-25	22	Less than 25	African-American	0	9	0	1	0	0	2013-01-01 01:31:55	2013-01-22 09:01:52	13000048MM10A	2013-01-01		0	(M1)	Unlaw Use False Name/Identity	1	15000148MM10A	(M2)	0	2015-01-04	Petit Theft	2015-01-04	2015-01-08		0					Risk of Recidivism	9	High	2013-01-01	Risk of Violence	7	Medium	2013-01-01	2015-01-04	2015-01-08	0	374
605	gueslly deravine	gueslly	deravine	2013-03-27	Male	1989-11-30	26	25 - 45	African-American	0	7	0	2	6	-34	2013-02-21 01:31:52	2013-02-21 07:44:48	13002675CF10A	2013-02-20		35	(F2)	Poss Cocaine/Intent To Del/Sel	0									0					Risk of Recidivism	7	Medium	2013-03-27	Risk of Violence	7	Medium	2013-03-27	2013-12-24	2014-02-10	6	0
605	gueslly deravine	gueslly	deravine	2013-03-27	Male	1989-11-30	26	25 - 45	African-American	0	7	0	2	6	-34	2013-02-21 01:31:52	2013-02-21 07:44:48	13002675CF10A	2013-02-20		35	(F2)	Poss Cocaine/Intent To Del/Sel	0									0					Risk of Recidivism	7	Medium	2013-03-27	Risk of Violence	7	Medium	2013-03-27	2014-04-17	2014-06-25	6	320
605	gueslly deravine	gueslly	deravine	2013-03-27	Male	1989-11-30	26	25 - 45	African-American	0	7	0	2	6	-34	2013-02-21 01:31:52	2013-02-21 07:44:48	13002675CF10A	2013-02-20		35	(F2)	Poss Cocaine/Intent To Del/Sel	0									0					Risk of Recidivism	7	Medium	2013-03-27	Risk of Violence	7	Medium	2013-03-27	2014-04-17	2014-06-25	6	455
606	ronald woebke	ronald	woebke	2014-09-22	Male	1975-08-19	40	25 - 45	Caucasian	0	1	0	0	0	0	2014-09-22 04:09:01	2014-09-22 08:19:33	14014040MM10A	2014-09-22		0	(M1)	Battery	0									0					Risk of Recidivism	1	Low	2014-09-22	Risk of Violence	1	Low	2014-09-22	2014-09-22	2014-09-22	0	0
607	amzali sabzaliev	amzali	sabzaliev	2014-08-28	Male	1951-01-10	65	Greater than 45	Caucasian	0	1	0	0	0	0	2014-08-28 06:18:04	2014-08-31 04:44:27	14012932MM10A	2014-08-28		0	(M1)	Battery	0									0					Risk of Recidivism	1	Low	2014-08-28	Risk of Violence	1	Low	2014-08-28	2014-08-28	2014-08-31	0	3
608	christopher tokarz	christopher	tokarz	2013-03-27	Male	1990-05-31	25	25 - 45	Caucasian	0	2	0	0	0	0	2013-03-27 02:09:08	2013-03-27 06:55:04	13004427CF10A	2013-03-26		1	(F3)	Resist Officer w/Violence	0									0					Risk of Recidivism	2	Low	2013-03-27	Risk of Violence	3	Low	2013-03-27	2013-03-27	2013-03-27	0	0
609	richard kelly	richard	kelly	2013-10-08	Male	1947-10-19	68	Greater than 45	Caucasian	0	1	0	0	2	-150	2013-05-11 07:27:55	2013-05-12 02:24:08	13006761CF10A	2013-05-11		150	(F3)	Aggravated Assault W/dead Weap	0									0					Risk of Recidivism	1	Low	2013-10-08	Risk of Violence	1	Low	2013-10-08	2013-05-11	2013-05-12	2	0
610	veronica cabanas	veronica	cabanas	2014-08-11	Female	1983-06-15	32	25 - 45	Caucasian	0	4	0	0	1	-1	2014-08-10 09:36:41	2014-08-12 11:29:36	14010911CF10A	2014-08-10		1	(F3)	Neglect Child / No Bodily Harm	0									0					Risk of Recidivism	4	Low	2014-08-11	Risk of Violence	4	Low	2014-08-11	2014-08-10	2014-08-12	1	1
611	ephiram burnette	ephiram	burnette	2013-01-04	Male	1959-05-19	56	Greater than 45	African-American	0	3	0	0	5	-1	2013-01-03 05:51:09	2013-01-15 07:43:49	13000103CF10A	2013-01-03		1	(F3)	Driving While License Revoked	0									0					Risk of Recidivism	3	Low	2013-01-04	Risk of Violence	3	Low	2013-01-04	2013-06-11	2013-11-01	5	11
611	ephiram burnette	ephiram	burnette	2013-01-04	Male	1959-05-19	56	Greater than 45	African-American	0	3	0	0	5	-1	2013-01-03 05:51:09	2013-01-15 07:43:49	13000103CF10A	2013-01-03		1	(F3)	Driving While License Revoked	0									0					Risk of Recidivism	3	Low	2013-01-04	Risk of Violence	3	Low	2013-01-04	2013-06-11	2013-11-01	5	301
612	carlton brown	carlton	brown	2013-09-04	Male	1988-11-16	27	25 - 45	African-American	0	8	0	0	9	-1	2013-09-03 03:15:25	2013-10-25 06:07:27	13012422CF10A	2013-09-03		1	(F2)	Aggravated Battery / Pregnant	1	14015983CF10A	(F2)	0	2014-11-30	Aggravated Battery / Pregnant	2014-11-30	2015-02-04		1	14015983CF10A	(F2)	2014-11-30	Aggravated Battery / Pregnant	Risk of Recidivism	8	High	2013-09-04	Risk of Violence	8	High	2013-09-04	2013-10-29	2013-12-11	9	51
612	carlton brown	carlton	brown	2013-09-04	Male	1988-11-16	27	25 - 45	African-American	0	8	0	0	9	-1	2013-09-03 03:15:25	2013-10-25 06:07:27	13012422CF10A	2013-09-03		1	(F2)	Aggravated Battery / Pregnant	1	14015983CF10A	(F2)	0	2014-11-30	Aggravated Battery / Pregnant	2014-11-30	2015-02-04		1	14015983CF10A	(F2)	2014-11-30	Aggravated Battery / Pregnant	Risk of Recidivism	8	High	2013-09-04	Risk of Violence	8	High	2013-09-04	2014-06-18	2014-06-25	9	98
612	carlton brown	carlton	brown	2013-09-04	Male	1988-11-16	27	25 - 45	African-American	0	8	0	0	9	-1	2013-09-03 03:15:25	2013-10-25 06:07:27	13012422CF10A	2013-09-03		1	(F2)	Aggravated Battery / Pregnant	1	14015983CF10A	(F2)	0	2014-11-30	Aggravated Battery / Pregnant	2014-11-30	2015-02-04		1	14015983CF10A	(F2)	2014-11-30	Aggravated Battery / Pregnant	Risk of Recidivism	8	High	2013-09-04	Risk of Violence	8	High	2013-09-04	2014-11-30	2015-02-04	9	294
613	constance greene	constance	greene	2014-05-29	Male	1963-09-05	52	Greater than 45	Caucasian	0	1	0	0	4	-1	2014-05-28 04:41:14	2014-06-04 05:26:28	14007417CF10A	2014-05-28		1	(F3)	Grand Theft in the 3rd Degree	1	15000635MM10A	(M1)	0	2015-01-17	Petit Theft/ Prior Conviction	2015-01-17	2015-05-07		0					Risk of Recidivism	1	Low	2014-05-29	Risk of Violence	1	Low	2014-05-29	2015-01-17	2015-05-07	4	6
614	veronica joseph	veronica	joseph	2014-07-22	Female	1985-02-18	31	25 - 45	African-American	0	2	0	0	0	-1	2014-07-21 11:06:04	2014-07-23 11:13:41	14009961CF10A	2014-07-21		1	(F2)	Agg Battery Grt/Bod/Harm	0									0					Risk of Recidivism	2	Low	2014-07-22	Risk of Violence	2	Low	2014-07-22	2014-07-21	2014-07-23	0	1
616	andre wilson	andre	wilson	2013-02-07	Male	1983-11-30	32	25 - 45	African-American	0	2	0	0	3	0	2013-02-07 02:19:38	2013-02-08 05:35:52	13001912CF10A	2013-02-06		1	(F3)	Battery on Law Enforc Officer	0									0					Risk of Recidivism	2	Low	2013-02-07	Risk of Violence	2	Low	2013-02-07	2014-06-16	2014-06-20	3	1
616	andre wilson	andre	wilson	2013-02-07	Male	1983-11-30	32	25 - 45	African-American	0	2	0	0	3	0	2013-02-07 02:19:38	2013-02-08 05:35:52	13001912CF10A	2013-02-06		1	(F3)	Battery on Law Enforc Officer	0									0					Risk of Recidivism	2	Low	2013-02-07	Risk of Violence	2	Low	2013-02-07	2015-06-09	2015-06-10	3	498
616	andre wilson	andre	wilson	2013-02-07	Male	1983-11-30	32	25 - 45	African-American	0	2	0	0	3	0	2013-02-07 02:19:38	2013-02-08 05:35:52	13001912CF10A	2013-02-06		1	(F3)	Battery on Law Enforc Officer	0									0					Risk of Recidivism	2	Low	2013-02-07	Risk of Violence	2	Low	2013-02-07	2015-06-09	2015-06-10	3	853
617	jean lumene	jean	lumene	2013-11-26	Male	1955-07-16	60	Greater than 45	Other	0	1	0	0	4	-1	2013-11-25 05:03:19	2013-11-26 08:38:12	13016424CF10A		2013-11-25	1	(F3)	arrest case no charge	0									0					Risk of Recidivism	1	Low	2013-11-26	Risk of Violence	1	Low	2013-11-26	2015-01-08	2015-01-09	4	0
617	jean lumene	jean	lumene	2013-11-26	Male	1955-07-16	60	Greater than 45	Other	0	1	0	0	4	-1	2013-11-25 05:03:19	2013-11-26 08:38:12	13016424CF10A		2013-11-25	1	(F3)	arrest case no charge	0									0					Risk of Recidivism	1	Low	2013-11-26	Risk of Violence	1	Low	2013-11-26	2015-01-08	2015-01-09	4	409
618	karim meghani	karim	meghani	2014-11-24	Male	1980-05-25	35	25 - 45	African-American	0	6	6	3	29	-74	2014-09-11 03:34:03	2014-09-11 07:00:11	14012387CF10A		2014-09-11	74	(F3)	arrest case no charge	0									0					Risk of Recidivism	6	Medium	2014-11-24	Risk of Violence	2	Low	2014-11-24	2014-09-11	2014-09-11	29	0
619	herman minor	herman	minor	2013-04-11	Male	1984-06-29	31	25 - 45	African-American	0	8	0	0	4	-1	2013-04-10 11:28:52	2013-09-28 04:10:38	12013057CF10A		2013-04-10	1	(F2)	arrest case no charge	0									0					Risk of Recidivism	8	High	2013-04-11	Risk of Violence	8	High	2013-04-11	2014-10-27	2016-04-13	4	170
619	herman minor	herman	minor	2013-04-11	Male	1984-06-29	31	25 - 45	African-American	0	8	0	0	4	-1	2013-04-10 11:28:52	2013-09-28 04:10:38	12013057CF10A		2013-04-10	1	(F2)	arrest case no charge	0									0					Risk of Recidivism	8	High	2013-04-11	Risk of Violence	8	High	2013-04-11	2014-10-27	2016-04-13	4	1098
620	lawrence seigel	lawrence	seigel	2014-06-24	Male	1965-03-16	51	Greater than 45	Caucasian	0	3	0	0	3				13014613CT10A	2013-07-18		341	(CT)	Contempt/Fail To Appear/Summons	0									0					Risk of Recidivism	3	Low	2014-06-24	Risk of Violence	2	Low	2014-06-24			3	0
621	christopher pantoja	christopher	pantoja	2013-04-29	Male	1992-06-18	23	Less than 25	Hispanic	0	3	0	0	1	-5	2013-04-24 07:55:53	2013-04-29 12:20:11	13010212MM10A	2013-04-24		5	(M2)	Exposes Culpable Negligence	0									0					Risk of Recidivism	3	Low	2013-04-29	Risk of Violence	4	Low	2013-04-29	2013-04-24	2013-04-29	1	0
622	andrew ward	andrew	ward	2013-06-20	Female	1976-04-26	39	25 - 45	Caucasian	0	6	0	0	0	-2	2013-06-18 07:12:57	2013-06-19 06:12:35	13011699MM10A	2013-06-18		2	(M2)	Disorderly Intoxication	0									0					Risk of Recidivism	6	Medium	2013-06-20	Risk of Violence	2	Low	2013-06-20	2013-06-18	2013-06-19	0	0
623	dean serfis	dean	serfis	2013-10-19	Male	1959-05-23	56	Greater than 45	Caucasian	0	1	0	0	0	-1	2013-10-18 08:52:53	2013-10-19 08:16:43	13019771MM10A	2013-10-18		1	(M1)	Battery	0									0					Risk of Recidivism	1	Low	2013-10-19	Risk of Violence	1	Low	2013-10-19	2013-10-18	2013-10-19	0	0
624	kandice metayer	kandice	metayer	2013-08-24	Female	1993-12-03	22	Less than 25	African-American	0	7	0	0	0	0	2013-08-24 02:29:37	2013-08-24 08:38:38	13011936CF10A	2013-08-23		1	(F3)	Poss3,4 Methylenedioxymethcath	0									0					Risk of Recidivism	7	Medium	2013-08-24	Risk of Violence	8	High	2013-08-24	2013-08-24	2013-08-24	0	0
625	kayla stanley	kayla	stanley	2013-08-20	Female	1989-03-24	27	25 - 45	African-American	0	2	0	0	1	-31	2013-07-20 10:54:56	2013-07-21 05:31:13	13010205CF10A	2013-07-20		31	(F3)	Use Scanning Device to Defraud	1	15000741MM40A	(M2)		2015-01-13	Petit Theft				0					Risk of Recidivism	2	Low	2013-08-20	Risk of Violence	2	Low	2013-08-20	2013-07-20	2013-07-21	1	0
626	vickie weaver	vickie	weaver	2014-09-08	Female	1968-10-22	47	Greater than 45	Caucasian	0	1	0	0	1	-1	2014-09-07 07:20:18	2014-09-08 11:09:05	99018444CF10A		2014-09-07	1	(F3)	arrest case no charge	0									0					Risk of Recidivism	1	Low	2014-09-08	Risk of Violence	1	Low	2014-09-08	2014-09-07	2014-09-08	1	0
627	leroy battie	leroy	battie	2013-04-19	Male	1963-02-06	53	Greater than 45	African-American	0	6	0	0	11	-1	2013-04-18 08:45:19	2013-08-06 09:11:16	13005565CF10A		2013-04-18	1	(F7)	arrest case no charge	0									0					Risk of Recidivism	6	Medium	2013-04-19	Risk of Violence	3	Low	2013-04-19	2013-04-18	2013-08-06	11	109
628	daniel steggerda	daniel	steggerda	2014-07-31	Male	1990-10-12	25	25 - 45	Caucasian	0	2	0	0	0	0	2014-07-31 03:49:54	2014-07-31 08:39:54	14028010MU10A	2014-07-31		0	(M1)	Driving Under The Influence	1	15000242MM20A	(M2)	354	2014-12-30	Susp Drivers Lic 1st Offense	2015-12-19	2015-12-19		0					Risk of Recidivism	2	Low	2014-07-31	Risk of Violence	3	Low	2014-07-31	2015-12-19	2015-12-19	0	0
629	kenny castillo	kenny	castillo	2013-10-28	Male	1995-03-28	21	Less than 25	Hispanic	0	3	0	0	0	0	2013-10-28 03:10:30	2013-10-28 07:42:27	13020395MM10A	2013-10-28		0	(M1)	Battery	0									0					Risk of Recidivism	3	Low	2013-10-28	Risk of Violence	6	Medium	2013-10-28	2013-10-28	2013-10-28	0	0
630	daniel fosca	daniel	fosca	2014-02-09	Male	1993-10-02	22	Less than 25	Caucasian	0	3	0	0	0	-1	2014-02-08 09:30:32	2014-02-10 08:41:20	14001802CF10A	2014-02-08		1	(F3)	Leaving the Scene of Accident	0									0					Risk of Recidivism	3	Low	2014-02-09	Risk of Violence	5	Medium	2014-02-09	2014-02-08	2014-02-10	0	1
631	viviana pena	viviana	pena	2014-06-02	Female	1972-04-26	43	25 - 45	Hispanic	0	1	0	0	0	-3	2014-05-30 11:05:30	2014-05-31 09:39:48	14020201MU10A	2014-05-30		3	(M2)	Lve/Scen/Acc/Veh/Prop/Damage	0									0					Risk of Recidivism	1	Low	2014-06-02	Risk of Violence	1	Low	2014-06-02	2014-05-30	2014-05-31	0	0
632	jacqueline osorio	jacqueline	osorio	2014-08-11	Female	1956-12-08	59	Greater than 45	Caucasian	0	1	0	0	0	-2	2014-08-09 11:15:44	2014-08-10 08:57:06	14010870CF10A	2014-08-09		2	(F3)	Grand Theft (Motor Vehicle)	0									0					Risk of Recidivism	1	Low	2014-08-11	Risk of Violence	1	Low	2014-08-11	2014-08-09	2014-08-10	0	0
633	leslie fanning	leslie	fanning	2013-04-29	Female	1957-07-29	58	Greater than 45	Caucasian	0	1	0	0	2	-23	2013-04-06 08:22:37	2013-04-07 12:56:04	13006620MM10A	2013-04-06		23	(M1)	DUI Property Damage/Injury	0									0					Risk of Recidivism	1	Low	2013-04-29	Risk of Violence	1	Low	2013-04-29	2013-10-29	2013-11-15	2	0
633	leslie fanning	leslie	fanning	2013-04-29	Female	1957-07-29	58	Greater than 45	Caucasian	0	1	0	0	2	-23	2013-04-06 08:22:37	2013-04-07 12:56:04	13006620MM10A	2013-04-06		23	(M1)	DUI Property Damage/Injury	0									0					Risk of Recidivism	1	Low	2013-04-29	Risk of Violence	1	Low	2013-04-29	2013-10-29	2013-11-15	2	200
634	jonathan robinson	jonathan	robinson	2014-09-29	Male	1962-11-02	53	Greater than 45	African-American	0	1	0	0	4	-24	2014-09-05 12:29:21	2014-09-05 08:38:42	14012050CF10A	2014-09-04		25	(F3)	Possession of Cocaine	0									0					Risk of Recidivism	1	Low	2014-09-29	Risk of Violence	1	Low	2014-09-29	2015-05-27	2015-06-15	4	0
634	jonathan robinson	jonathan	robinson	2014-09-29	Male	1962-11-02	53	Greater than 45	African-American	0	1	0	0	4	-24	2014-09-05 12:29:21	2014-09-05 08:38:42	14012050CF10A	2014-09-04		25	(F3)	Possession of Cocaine	0									0					Risk of Recidivism	1	Low	2014-09-29	Risk of Violence	1	Low	2014-09-29	2015-05-27	2015-06-15	4	259
635	deverick jefferson	deverick	jefferson	2014-01-26	Male	1985-04-01	31	25 - 45	African-American	0	3	0	0	7	0	2014-01-26 01:17:17	2014-01-27 03:11:10	14001117CF10A	2014-01-25		1	(M1)	Aggravated Battery / Pregnant	1	14035639TC10A	(M2)		2014-09-08	Driving License Suspended				0					Risk of Recidivism	3	Low	2014-01-26	Risk of Violence	2	Low	2014-01-26	2014-01-26	2014-01-27	7	1
636	henry brand	henry	brand	2013-01-19	Male	1993-11-15	22	Less than 25	African-American	0	5	0	0	2	0	2013-01-19 03:19:21	2013-07-09 06:32:14	13000913CF10A	2013-01-18		1	(F2)	Robbery / No Weapon	0									0					Risk of Recidivism	5	Medium	2013-01-19	Risk of Violence	6	Medium	2013-01-19	2013-07-09	2015-08-12	2	935
637	ryan ingber	ryan	ingber	2013-06-26	Male	1994-04-06	22	Less than 25	Caucasian	0	5	0	0	1	-1	2013-06-25 11:20:19	2013-06-26 01:21:56	13008932CF10A	2013-06-25		1	(F3)	False Ownership Info/Pawn Item	1	13015295CF10A	(F3)	1	2013-11-02	Possession of Cocaine	2013-11-03	2013-11-21		0					Risk of Recidivism	5	Medium	2013-06-26	Risk of Violence	5	Medium	2013-06-26	2015-01-15	2015-11-01	1	0
638	steve sevil	steve	sevil	2013-01-10	Male	1987-07-27	28	25 - 45	African-American	0	6	0	0	8	-1	2013-01-09 01:31:01	2013-01-12 12:38:27	13000393CF10A	2013-01-09		1	(F3)	Uttering a Forged Instrument	1	13005721CF10A	(F1)		2013-01-16	Deliver Cocaine 1000FT School				0					Risk of Recidivism	6	Medium	2013-01-10	Risk of Violence	6	Medium	2013-01-10	2013-01-09	2013-01-12	8	2
639	ronelson stark	ronelson	stark	2013-09-15	Male	1973-10-04	42	25 - 45	Other	0	1	0	0	1	-1	2013-09-14 06:17:52	2013-09-16 07:28:47	13013046CF10A		2013-09-14	1	(F3)	arrest case no charge	0									0					Risk of Recidivism	1	Low	2013-09-15	Risk of Violence	1	Low	2013-09-15	2013-09-14	2013-09-16	1	1
640	shane lewis	shane	lewis	2013-08-11	Male	1995-07-09	20	Less than 25	African-American	0	7	0	0	0	0	2013-08-11 10:00:24	2013-08-12 07:46:52	13011265CF10A	2013-08-11		0	(F3)	Grand Theft (Motor Vehicle)	1	13004124MM40A	(M1)		2013-10-05	Possess Cannabis/20 Grams Or Less				0					Risk of Recidivism	7	Medium	2013-08-11	Risk of Violence	8	High	2013-08-11	2013-08-11	2013-08-12	0	1
641	edward holloway	edward	holloway	2014-11-03	Male	1986-11-08	29	25 - 45	Caucasian	0	6	0	0	0	0	2014-11-03 02:36:08	2014-11-08 12:48:35	14015878MM10A	2014-11-03		0	(M1)	Battery	1	15012389MM10A	(M1)		2015-11-29	Battery				1	15012389MM10A	(M1)	2015-11-29	Battery	Risk of Recidivism	6	Medium	2014-11-03	Risk of Violence	4	Low	2014-11-03	2014-11-03	2014-11-08	0	5
642	beth zimmerman	beth	zimmerman	2014-07-11	Female	1974-12-20	41	25 - 45	Caucasian	0	1	0	0	0	-1	2014-07-10 05:11:29	2014-07-11 05:52:02	14025287MU10A	2014-07-09		2	(M1)	DUI - Enhanced	0									0					Risk of Recidivism	1	Low	2014-07-11	Risk of Violence	1	Low	2014-07-11	2014-07-10	2014-07-11	0	0
643	courtney battle	courtney	battle	2013-12-02	Male	1987-04-16	29	25 - 45	African-American	0	10	0	0	8	178	2014-05-29 12:37:30	2014-08-25 03:36:26	12002654CF10A		2012-03-28	614	(F3)	arrest case no charge	0									0					Risk of Recidivism	10	High	2013-12-02	Risk of Violence	9	High	2013-12-02	2014-05-29	2014-08-25	8	0
643	courtney battle	courtney	battle	2013-12-02	Male	1987-04-16	29	25 - 45	African-American	0	10	0	0	8	178	2014-05-29 12:37:30	2014-08-25 03:36:26	12002654CF10A		2012-03-28	614	(F3)	arrest case no charge	0									0					Risk of Recidivism	10	High	2013-12-02	Risk of Violence	9	High	2013-12-02	2014-05-29	2014-08-25	8	266
644	ricky simmons	ricky	simmons	2013-01-20	Male	1957-05-01	58	Greater than 45	African-American	0	7	0	0	21	-1	2013-01-19 04:12:14	2013-03-19 06:59:49	12022220MM10A		2013-01-18	2	(M1)	arrest case no charge	1	13004944CF10A	(M1)	0	2013-04-06	Resist/Obstruct W/O Violence	2013-04-06	2013-04-10		0					Risk of Recidivism	7	Medium	2013-01-20	Risk of Violence	4	Low	2013-01-20	2013-04-06	2013-04-10	21	58
645	bernard scott	bernard	scott	2013-02-14	Male	1993-11-25	22	Less than 25	African-American	0	7	0	0	3	-1	2013-02-13 05:57:01	2013-05-30 09:53:38	13002233CF10A	2013-02-13		1	(F3)	Grand Theft in the 3rd Degree	0									0					Risk of Recidivism	7	Medium	2013-02-14	Risk of Violence	6	Medium	2013-02-14	2014-04-10	2014-04-16	3	105
645	bernard scott	bernard	scott	2013-02-14	Male	1993-11-25	22	Less than 25	African-American	0	7	0	0	3	-1	2013-02-13 05:57:01	2013-05-30 09:53:38	13002233CF10A	2013-02-13		1	(F3)	Grand Theft in the 3rd Degree	0									0					Risk of Recidivism	7	Medium	2013-02-14	Risk of Violence	6	Medium	2013-02-14	2014-04-10	2014-04-16	3	426
646	raul mora	raul	mora	2013-12-10	Male	1967-11-12	48	Greater than 45	Hispanic	0	1	0	0	1	0	2013-12-10 03:46:31	2013-12-11 03:41:00	13022856MM10A	2013-12-10		0	(M2)	Operating W/O Valid License	1	14015904MU10A	(M2)		2014-04-24	Driving License Suspended				0					Risk of Recidivism	1	Low	2013-12-10	Risk of Violence	1	Low	2013-12-10	2013-12-10	2013-12-11	1	1
647	cesar turcios	cesar	turcios	2013-01-18	Male	1979-02-13	37	25 - 45	Caucasian	0	4	0	0	0	0	2013-01-18 05:11:46	2013-01-18 08:38:29	13000889CF10A	2013-01-18		0	(F3)	Crimin Mischief Damage $1000+	0									0					Risk of Recidivism	4	Low	2013-01-18	Risk of Violence	3	Low	2013-01-18	2013-01-18	2013-01-18	0	0
648	rickey butler	rickey	butler	2014-11-21	Male	1959-02-25	57	Greater than 45	African-American	0	5	0	0	1	-1	2014-11-20 07:13:25	2014-12-16 02:02:17	14015626CF10A	2014-11-20		1	(F3)	Felony Petit Theft	1	15000820CF10A	(M1)	0	2015-01-19	Possess Cannabis/20 Grams Or Less	2015-01-19	2015-05-17		0					Risk of Recidivism	5	Medium	2014-11-21	Risk of Violence	6	Medium	2014-11-21	2015-01-19	2015-05-17	1	25
649	alejandro remis	alejandro	remis	2013-08-19	Male	1988-10-11	27	25 - 45	Caucasian	0	1	0	0	3	-22	2013-07-28 02:14:16	2013-07-28 02:01:46	13010525CF10A	2013-07-28		22	(M1)	Fleeing or Eluding a LEO	0									0					Risk of Recidivism	1	Low	2013-08-19	Risk of Violence	1	Low	2013-08-19	2013-07-28	2013-07-28	3	0
651	ervin watson	ervin	watson	2013-04-12	Male	1990-02-18	26	25 - 45	African-American	0	4	0	0	3	0	2013-04-12 06:16:59	2013-05-15 07:34:15	13005307CF10A	2013-04-12		0	(F2)	Burglary Unoccupied Dwelling	0									0					Risk of Recidivism	4	Low	2013-04-12	Risk of Violence	3	Low	2013-04-12	2013-07-09	2013-07-10	3	33
651	ervin watson	ervin	watson	2013-04-12	Male	1990-02-18	26	25 - 45	African-American	0	4	0	0	3	0	2013-04-12 06:16:59	2013-05-15 07:34:15	13005307CF10A	2013-04-12		0	(F2)	Burglary Unoccupied Dwelling	0									0					Risk of Recidivism	4	Low	2013-04-12	Risk of Violence	3	Low	2013-04-12	2013-07-09	2013-07-10	3	89
653	julio ramos	julio	ramos	2013-11-13	Male	1991-10-12	24	Less than 25	Caucasian	0	8	1	1	3	0	2013-11-13 03:26:47	2013-11-13 08:24:17	13015793CF10A	2013-11-13		0	(F3)	Poss3,4 Methylenedioxymethcath	1	14066428TC20A	(M2)	179	2014-09-20	Operating W/O Valid License	2015-03-18	2015-03-27		0					Risk of Recidivism	8	High	2013-11-13	Risk of Violence	5	Medium	2013-11-13	2014-07-16	2014-07-30	3	0
653	julio ramos	julio	ramos	2013-11-13	Male	1991-10-12	24	Less than 25	Caucasian	0	8	1	1	3	0	2013-11-13 03:26:47	2013-11-13 08:24:17	13015793CF10A	2013-11-13		0	(F3)	Poss3,4 Methylenedioxymethcath	1	14066428TC20A	(M2)	179	2014-09-20	Operating W/O Valid License	2015-03-18	2015-03-27		0					Risk of Recidivism	8	High	2013-11-13	Risk of Violence	5	Medium	2013-11-13	2014-07-16	2014-07-30	3	259
654	aaron hullander	aaron	hullander	2013-12-09	Male	1983-02-19	33	25 - 45	Caucasian	0	1	0	0	0	-1	2013-12-08 02:41:16	2013-12-09 08:36:04	13016972CF10A	2013-12-08		1	(F2)	Aggravated Battery / Pregnant	0									0					Risk of Recidivism	1	Low	2013-12-09	Risk of Violence	2	Low	2013-12-09	2013-12-08	2013-12-09	0	0
655	michael campea	michael	campea	2014-04-15	Male	1988-03-06	28	25 - 45	Caucasian	0	2	0	0	1	-1	2014-04-14 01:48:26	2014-04-16 06:17:38	14004312CF10A		2014-04-14	1	(F3)	arrest case no charge	0									0					Risk of Recidivism	2	Low	2014-04-15	Risk of Violence	3	Low	2014-04-15	2014-04-14	2014-04-16	1	1
656	sean naar	sean	naar	2013-01-07	Male	1987-01-25	29	25 - 45	African-American	0	6	0	0	2	-1	2013-01-06 10:04:53	2013-01-07 09:20:44	12015053CF10A		2013-01-06	1	(F3)	arrest case no charge	0									0					Risk of Recidivism	6	Medium	2013-01-07	Risk of Violence	3	Low	2013-01-07	2013-01-06	2013-01-07	2	0
657	brittany brantley	brittany	brantley	2014-01-19	Female	1991-06-23	24	Less than 25	African-American	0	10	0	0	3	-1	2014-01-18 08:34:16	2014-01-19 08:44:14	14000791CF10A	2014-01-18		1	(F3)	Grand Theft in the 3rd Degree	1	14009496CF10A	(F3)		2014-03-14	Grand Theft in the 3rd Degree				0					Risk of Recidivism	10	High	2014-01-19	Risk of Violence	9	High	2014-01-19	2014-09-11	2014-12-20	3	0
658	christian vinas	christian	vinas	2014-10-14	Male	1991-12-15	24	Less than 25	Caucasian	0	1	0	0	0	-1	2014-10-13 06:10:43	2014-10-14 07:15:14	14014958MM10A	2014-10-13		1	(M1)	Battery	0									0					Risk of Recidivism	1	Low	2014-10-14	Risk of Violence	2	Low	2014-10-14	2014-10-13	2014-10-14	0	0
659	pablo rocha	pablo	rocha	2014-07-28	Male	1996-05-26	19	Less than 25	Caucasian	0	10	0	1	1	-1	2014-07-27 04:46:20	2014-08-28 05:30:10	14010239CF10A	2014-07-27		1	(F3)	Felony Battery (Dom Strang)	1	15001088MM10A	(M1)	0	2015-01-27	Petit Theft $100- $300	2015-01-27	2015-01-30		0					Risk of Recidivism	10	High	2014-07-28	Risk of Violence	8	High	2014-07-28	2014-11-16	2014-11-21	1	31
659	pablo rocha	pablo	rocha	2014-07-28	Male	1996-05-26	19	Less than 25	Caucasian	0	10	0	1	1	-1	2014-07-27 04:46:20	2014-08-28 05:30:10	14010239CF10A	2014-07-27		1	(F3)	Felony Battery (Dom Strang)	1	15001088MM10A	(M1)	0	2015-01-27	Petit Theft $100- $300	2015-01-27	2015-01-30		0					Risk of Recidivism	10	High	2014-07-28	Risk of Violence	8	High	2014-07-28	2015-01-27	2015-01-30	1	116
660	carlos rosario	carlos	rosario	2013-10-15	Male	1980-04-10	36	25 - 45	Caucasian	0	1	0	0	2	-1	2013-10-14 07:59:18	2013-10-15 07:40:50	13019495MM10A	2013-10-14		1	(M1)	Battery	0									0					Risk of Recidivism	1	Low	2013-10-15	Risk of Violence	1	Low	2013-10-15	2013-10-14	2013-10-15	2	0
661	henri pyram	henri	pyram	2014-07-17	Male	1982-12-19	33	25 - 45	Other	0	1	0	0	0	-1	2014-07-16 05:31:14	2014-07-17 08:13:05	14009705CF10A	2014-07-16		1	(F3)	Tampering With Physical Evidence	0									0					Risk of Recidivism	1	Low	2014-07-17	Risk of Violence	1	Low	2014-07-17	2014-07-16	2014-07-17	0	0
662	lisette echevarria	lisette	echevarria	2013-04-26	Female	1991-12-20	24	Less than 25	Caucasian	0	5	0	0	0	0	2013-04-26 02:32:29	2013-04-26 08:01:47	13006023CF10A	2013-04-25		1	(F3)	Poss3,4 Methylenedioxymethcath	0									0					Risk of Recidivism	5	Medium	2013-04-26	Risk of Violence	5	Medium	2013-04-26	2013-04-26	2013-04-26	0	0
663	sean anderson	sean	anderson	2014-09-24	Male	1983-10-23	32	25 - 45	Caucasian	0	1	0	0	0	0	2014-09-24 01:45:37	2014-09-24 08:20:00	14034607MU10A	2014-09-23		1	(M1)	Driving Under The Influence	0									0					Risk of Recidivism	1	Low	2014-09-24	Risk of Violence	1	Low	2014-09-24	2014-09-24	2014-09-24	0	0
664	robson de souza	robson	de souza	2013-05-13	Male	1982-03-22	34	25 - 45	Caucasian	0	1	0	0	0	0	2013-05-13 06:00:31	2013-05-13 07:26:25	13009229MM10A	2013-05-13		0	(M1)	DUI Level 0.15 Or Minor In Veh	0									0					Risk of Recidivism	1	Low	2013-05-13	Risk of Violence	1	Low	2013-05-13	2013-05-13	2013-05-13	0	0
665	jimmy deloach	jimmy	deloach	2014-05-02	Male	1984-04-23	31	25 - 45	African-American	0	1	0	0	1	0	2014-05-02 03:51:09	2014-05-04 01:51:41	14006158CF10A		2014-05-02	0	(F3)	arrest case no charge	0									0					Risk of Recidivism	1	Low	2014-05-02	Risk of Violence	1	Low	2014-05-02	2014-05-02	2014-05-04	1	2
667	ariel barias	ariel	barias	2014-07-29	Male	1991-10-31	24	Less than 25	African-American	0	4	0	0	4	-1	2014-07-28 05:29:54	2014-07-29 08:35:00	14010297CF10A	2014-07-28		1	(F3)	False Imprisonment	0									0					Risk of Recidivism	4	Low	2014-07-29	Risk of Violence	5	Medium	2014-07-29	2014-07-28	2014-07-29	4	0
668	felix manzueta	felix	manzueta	2013-03-12	Male	1990-09-18	25	25 - 45	Hispanic	0	5	0	0	2	-1	2013-03-11 08:47:22	2013-03-12 01:01:00	13003587CF10A		2013-03-11	1	(F3)	arrest case no charge	1	13008082CF10A	(M1)	0	2013-06-07	Resist/Obstruct W/O Violence	2013-06-07	2013-06-09		1	13008082CF10A	(F2)	2013-06-07	Aggravated Battery	Risk of Recidivism	5	Medium	2013-03-12	Risk of Violence	3	Low	2013-03-12	2013-06-07	2013-06-09	2	0
669	robby ireland	robby	ireland	2014-03-05	Male	1996-02-04	20	Less than 25	African-American	1	10	0	1	1	-1	2014-03-04 08:07:24	2014-03-05 08:09:37	14003032CF10A		2014-03-04	1	(F3)	arrest case no charge	1	14016748MM10A	(M2)	0	2014-10-30	Trespass Struct/Conveyance	2014-10-30	2015-04-07		0					Risk of Recidivism	10	High	2014-03-05	Risk of Violence	8	High	2014-03-05	2014-10-30	2015-04-07	1	0
672	dominick frazier	dominick	frazier	2014-10-25	Male	1993-08-30	22	Less than 25	African-American	0	3	0	0	1	0	2014-10-25 12:33:08	2014-10-25 08:50:44	14014370CF10A		2014-10-24	1	(F3)	arrest case no charge	0									0					Risk of Recidivism	3	Low	2014-10-25	Risk of Violence	5	Medium	2014-10-25	2014-10-25	2014-10-25	1	0
673	adriel stockton	adriel	stockton	2014-09-08	Male	1987-08-26	28	25 - 45	Hispanic	0	5	0	0	2	-263	2013-12-19 10:00:03	2013-12-20 12:55:18	12008430MM10A		2013-12-19	263	(M1)	arrest case no charge	1	15015390CF10A	(F2)	0	2015-11-27	Robbery / No Weapon	2015-11-27	2015-12-11		1	15015390CF10A	(F3)	2015-11-27	Battery on a Person Over 65	Risk of Recidivism	5	Medium	2014-09-08	Risk of Violence	3	Low	2014-09-08	2015-11-27	2015-12-11	2	0
674	haveard cobb	haveard	cobb	2013-09-24	Male	1991-07-14	24	Less than 25	African-American	0	2	0	0	1	-1	2013-09-23 10:13:09	2013-09-25 09:17:37	13018140MM10A	2013-09-23		1	(M1)	Battery	1	14009581MM10A	(M1)	0	2014-06-18	Battery	2014-06-18	2014-06-19		1	14009581MM10A	(M1)	2014-06-18	Battery	Risk of Recidivism	2	Low	2013-09-24	Risk of Violence	4	Low	2013-09-24	2014-06-18	2014-06-19	1	1
675	thomas zaremba	thomas	zaremba	2013-01-22	Male	1954-08-28	61	Greater than 45	Caucasian	0	1	0	0	4	-1	2013-01-21 08:12:45	2013-01-23 02:40:57	01006487CF10D		2013-01-21	1	(F3)	arrest case no charge	0									0					Risk of Recidivism	1	Low	2013-01-22	Risk of Violence	1	Low	2013-01-22	2013-01-21	2013-01-23	4	1
676	shelby bruns	shelby	bruns	2013-11-23	Male	1981-09-07	34	25 - 45	Caucasian	0	6	0	0	9	-1	2013-11-22 01:13:42	2014-05-30 08:42:57	13016278CF10A	2013-11-22		1	(F3)	Aggravated Assault W/Dead Weap	0									0					Risk of Recidivism	6	Medium	2013-11-23	Risk of Violence	4	Low	2013-11-23	2013-11-22	2014-05-30	9	188
677	kylee simmons	kylee	simmons	2014-07-29	Female	1988-07-25	27	25 - 45	Caucasian	0	4	0	0	1	-14	2014-07-15 04:42:23	2014-07-29 11:06:38	13016039CF10A		2014-07-15	14	(F3)	arrest case no charge	0									0					Risk of Recidivism	4	Low	2014-07-29	Risk of Violence	2	Low	2014-07-29	2014-10-02	2015-05-20	1	0
677	kylee simmons	kylee	simmons	2014-07-29	Female	1988-07-25	27	25 - 45	Caucasian	0	4	0	0	1	-14	2014-07-15 04:42:23	2014-07-29 11:06:38	13016039CF10A		2014-07-15	14	(F3)	arrest case no charge	0									0					Risk of Recidivism	4	Low	2014-07-29	Risk of Violence	2	Low	2014-07-29	2015-08-21	2015-09-11	1	295
677	kylee simmons	kylee	simmons	2014-07-29	Female	1988-07-25	27	25 - 45	Caucasian	0	4	0	0	1	-14	2014-07-15 04:42:23	2014-07-29 11:06:38	13016039CF10A		2014-07-15	14	(F3)	arrest case no charge	0									0					Risk of Recidivism	4	Low	2014-07-29	Risk of Violence	2	Low	2014-07-29	2015-08-21	2015-09-11	1	409
678	johnnie randell	johnnie	randell	2014-03-05	Female	1965-12-14	50	Greater than 45	African-American	0	2	0	0	3	0	2014-03-05 12:31:35	2014-03-05 08:38:53	14003105CF10A	2014-03-04		1	(F3)	Aggravated Assault W/Dead Weap	0									0					Risk of Recidivism	2	Low	2014-03-05	Risk of Violence	1	Low	2014-03-05	2014-03-05	2014-03-05	3	0
679	anthony louis	anthony	louis	2013-03-19	Male	1985-07-19	30	25 - 45	African-American	0	1	0	0	1	0	2013-03-19 01:34:13	2013-03-23 12:51:55	13005335MM10A	2013-03-18		1	(M1)	Battery	0									0					Risk of Recidivism	1	Low	2013-03-19	Risk of Violence	2	Low	2013-03-19	2013-03-19	2013-03-23	1	4
680	broderick alston	broderick	alston	2013-11-30	Male	1977-09-04	38	25 - 45	African-American	0	3	0	0	5	-1	2013-11-29 07:00:11	2013-11-30 12:28:10	13016563CF10A	2013-11-29		1	(F3)	Possession of Cannabis	0									0					Risk of Recidivism	3	Low	2013-11-30	Risk of Violence	2	Low	2013-11-30	2013-11-29	2013-11-30	5	0
681	christopher kasten	christopher	kasten	2013-12-13	Male	1991-06-06	24	Less than 25	Caucasian	0	1	0	0	0	-1	2013-12-12 09:51:57	2013-12-13 01:45:42	13023013MM10A	2013-12-12		1	(M1)	Battery	0									0					Risk of Recidivism	1	Low	2013-12-13	Risk of Violence	2	Low	2013-12-13	2013-12-12	2013-12-13	0	0
682	thomas young	thomas	young	2014-04-26	Male	1989-01-07	27	25 - 45	African-American	1	8	0	0	2	-1	2014-04-25 05:24:27	2014-04-27 03:29:27	14005781CF10A	2014-04-25		1	(F3)	Grand Theft Firearm	0									0					Risk of Recidivism	8	High	2014-04-26	Risk of Violence	5	Medium	2014-04-26	2014-04-25	2014-04-27	2	1
683	michael selz	michael	selz	2014-06-19	Male	1981-05-25	34	25 - 45	Caucasian	0	1	0	0	0	0	2014-06-19 03:06:09	2014-06-19 08:59:47	14009628MM10A	2014-06-18		1	(M1)	Battery	0									0					Risk of Recidivism	1	Low	2014-06-19	Risk of Violence	1	Low	2014-06-19	2014-06-19	2014-06-19	0	0
684	steven wilson	steven	wilson	2013-10-02	Male	1971-03-19	45	Greater than 45	African-American	0	2	0	0	16	-83	2013-07-11 11:35:36	2013-09-14 03:05:59	13010099CF10A		2013-07-17	77	(F3)	arrest case no charge	0									0					Risk of Recidivism	2	Low	2013-10-02	Risk of Violence	1	Low	2013-10-02	2013-07-11	2013-09-14	16	0
685	sabrina gray	sabrina	gray	2014-10-27	Female	1969-12-19	46	Greater than 45	African-American	0	10	0	0	2	-1	2014-10-26 11:14:31	2014-11-05 04:22:00	14014417CF10A	2014-10-26		1	(F3)	Grand Theft in the 3rd Degree	1	15003635CF10A	(F3)	0	2015-03-17	Use of Anti-Shoplifting Device	2015-03-17	2015-03-18		0					Risk of Recidivism	10	High	2014-10-27	Risk of Violence	8	High	2014-10-27	2015-03-17	2015-03-18	2	9
686	jason andrews	jason	andrews	2013-09-12	Male	1974-11-25	41	25 - 45	Caucasian	0	1	0	0	0	-1	2013-09-11 06:01:06	2013-09-15 02:36:35	13017318MM10A	2013-09-11		1	(M1)	Battery	1	14000843MM40A	(M2)		2014-02-01	Petit Theft				0					Risk of Recidivism	1	Low	2013-09-12	Risk of Violence	1	Low	2013-09-12	2013-09-11	2013-09-15	0	3
687	trevoy williams	trevoy	williams	2014-10-30	Male	1995-08-20	20	Less than 25	Other	0	8	0	1	0	-1	2014-10-29 03:32:22	2014-11-20 08:32:38	14014530CF10A	2014-10-29		1	(F3)	Possession of Cocaine	1	15003795CF10A	(F3)	0	2015-03-20	Possession Of Alprazolam	2015-03-20	2015-04-13		1	15003795CF10A	(M2)	2015-03-20	Assault	Risk of Recidivism	8	High	2014-10-30	Risk of Violence	6	Medium	2014-10-30	2015-03-20	2015-04-13	0	21
688	ian turnbull	ian	turnbull	2013-04-17	Male	1989-03-05	27	25 - 45	African-American	0	8	0	0	13	-1	2013-04-16 07:03:53	2013-04-17 10:30:53	13007374MM10A	2013-04-16		1	(M1)	Possess Cannabis/20 Grams Or Less	1	15004896MM10A	(M1)		2015-04-06	Battery				1	15004896MM10A	(M1)	2015-04-06	Battery	Risk of Recidivism	8	High	2013-04-17	Risk of Violence	9	High	2013-04-17	2016-03-18	2016-03-18	13	0
689	beverly smith	beverly	smith	2013-08-07	Female	1964-10-23	51	Greater than 45	African-American	0	8	0	0	16	-122	2013-04-07 10:07:51	2013-06-12 10:56:00	13004969CF10A	2013-04-07		122	(F3)	Possession of Cocaine	0									0					Risk of Recidivism	8	High	2013-08-07	Risk of Violence	1	Low	2013-08-07	2013-04-07	2013-06-12	16	0
691	marlon turner	marlon	turner	2013-10-16	Male	1989-10-11	26	25 - 45	African-American	0	6	0	0	1	-1	2013-10-15 07:08:32	2013-10-28 08:48:39	13019551MM10A	2013-10-15		1	(M1)	Battery	1	13014688CF10A	(F3)	523	2013-10-18	Crim Use of Personal ID Info	2015-03-25	2015-04-26		0					Risk of Recidivism	6	Medium	2013-10-16	Risk of Violence	3	Low	2013-10-16	2013-10-15	2013-10-28	1	0
692	xavier brown	xavier	brown	2014-10-30	Male	1987-03-01	29	25 - 45	African-American	0	5	0	0	3	0	2014-10-30 02:21:37	2014-10-31 04:43:59	14014588CF10A	2014-10-30		0	(F3)	Possession of Ethylone	1	15015066TC40A	(M2)		2015-02-25	Driving License Suspended				0					Risk of Recidivism	5	Medium	2014-10-30	Risk of Violence	3	Low	2014-10-30	2014-10-30	2014-10-31	3	1
693	steve stanley	steve	stanley	2013-10-25	Male	1964-03-18	52	Greater than 45	Caucasian	0	5	0	0	6	-1	2013-10-24 07:05:40	2013-10-26 02:35:00	13014853CF10A	2013-10-24		1	(F3)	Grand Theft in the 3rd Degree	1	14001678MM40A	(M1)		2014-04-05	Trespass Other Struct/Conve				0					Risk of Recidivism	5	Medium	2013-10-25	Risk of Violence	3	Low	2013-10-25	2013-10-24	2013-10-26	6	1
694	stephen washburn	stephen	washburn	2014-02-16	Male	1987-05-08	28	25 - 45	Caucasian	0	4	0	0	1	0	2014-02-16 12:19:08	2014-02-20 12:30:39	14002157CF10A	2014-02-15		1	(F2)	Agg Battery Grt/Bod/Harm	1	14011224MM10A	(M2)	0	2014-07-23	Assault	2014-07-23	2014-08-14		1	14011224MM10A	(M2)	2014-07-23	Assault	Risk of Recidivism	4	Low	2014-02-16	Risk of Violence	3	Low	2014-02-16	2014-07-23	2014-08-14	1	4
696	dorian osceola	dorian	osceola	2014-01-13	Female	1981-06-30	34	25 - 45	Native American	0	7	0	0	4	-152	2013-08-14 03:52:36	2013-11-19 04:05:13	13007784CF10A		2013-08-14	152	(F2)	arrest case no charge	1	14009863CF10A	(F3)	3	2014-07-16	Possession of Cocaine	2014-07-19	2014-07-19		0					Risk of Recidivism	7	Medium	2014-01-13	Risk of Violence	3	Low	2014-01-13	2015-07-08	2015-07-24	4	0
697	nathan yetts	nathan	yetts	2014-11-12	Male	1960-10-05	55	Greater than 45	African-American	0	3	0	0	5	-1	2014-11-11 12:52:32	2015-03-10 12:38:48	14015135CF10A	2014-11-11		1	(F3)	Felony Petit Theft	1	14015674CF10A	(F3)		2014-11-19	Felony Petit Theft				0					Risk of Recidivism	3	Low	2014-11-12	Risk of Violence	1	Low	2014-11-12	2014-11-11	2015-03-10	5	0
698	david glatt	david	glatt	2014-10-22	Male	1969-09-23	46	Greater than 45	Caucasian	0	2	0	0	2	-11	2014-10-11 09:37:56	2014-10-17 06:49:51	14014880MM10A	2014-10-11		11	(M1)	Petit Theft $100- $300	0									0					Risk of Recidivism	2	Low	2014-10-22	Risk of Violence	1	Low	2014-10-22	2014-10-11	2014-10-17	2	0
699	ronnie berg	ronnie	berg	2014-04-05	Male	1956-12-12	59	Greater than 45	Caucasian	0	1	0	0	0	0	2014-04-05 12:03:11	2014-04-05 01:26:18	14013149MU10A	2014-04-04		1	(M2)	Lve/Scen/Acc/Veh/Prop/Damage	0									0					Risk of Recidivism	1	Low	2014-04-05	Risk of Violence	1	Low	2014-04-05	2014-04-05	2014-04-05	0	0
700	brandon whitfield	brandon	whitfield	2013-03-05	Male	1989-07-22	26	25 - 45	African-American	1	9	1	0	10	-1	2013-03-04 11:33:53	2013-03-05 04:54:32	13003239CF10A	2013-03-04		1	(F2)	Aggravated Battery	1	14008023CF10A	(F3)	0	2014-06-10	Poss Pyrrolidinovalerophenone	2014-06-10	2014-06-10		1	15008298CF10A	(F3)	2015-06-27	Felony Battery (Dom Strang)	Risk of Recidivism	9	High	2013-03-05	Risk of Violence	6	Medium	2013-03-05	2014-06-10	2014-06-10	10	0
700	brandon whitfield	brandon	whitfield	2013-03-05	Male	1989-07-22	26	25 - 45	African-American	1	9	1	0	10	-1	2013-03-04 11:33:53	2013-03-05 04:54:32	13003239CF10A	2013-03-04		1	(F2)	Aggravated Battery	1	14008023CF10A	(F3)	0	2014-06-10	Poss Pyrrolidinovalerophenone	2014-06-10	2014-06-10		1	15008298CF10A	(F3)	2015-06-27	Felony Battery (Dom Strang)	Risk of Recidivism	9	High	2013-03-05	Risk of Violence	6	Medium	2013-03-05	2014-06-10	2014-06-10	10	462
701	eddie mosley	eddie	mosley	2013-09-11	Male	1987-08-20	28	25 - 45	African-American	0	10	0	0	5	-1	2013-09-10 04:03:57	2013-09-11 08:05:58	13012799CF10A	2013-09-10		1	(F3)	Possession Of Alprazolam	0									0					Risk of Recidivism	10	High	2013-09-11	Risk of Violence	10	High	2013-09-11	2013-09-10	2013-09-11	5	0
703	robert zinser	robert	zinser	2013-12-12	Male	1953-03-17	63	Greater than 45	Caucasian	0	1	0	0	2	-3	2013-12-09 08:43:05	2013-12-12 10:30:31	13017021CF10A	2013-12-09		3	(F3)	Felony DUI (level 3)	0									0					Risk of Recidivism	1	Low	2013-12-12	Risk of Violence	1	Low	2013-12-12	2014-06-25	2014-06-30	2	0
703	robert zinser	robert	zinser	2013-12-12	Male	1953-03-17	63	Greater than 45	Caucasian	0	1	0	0	2	-3	2013-12-09 08:43:05	2013-12-12 10:30:31	13017021CF10A	2013-12-09		3	(F3)	Felony DUI (level 3)	0									0					Risk of Recidivism	1	Low	2013-12-12	Risk of Violence	1	Low	2013-12-12	2014-06-25	2014-06-30	2	200
704	richard brown	richard	brown	2013-04-17	Male	1973-12-15	42	25 - 45	African-American	0	1	0	0	0	0	2013-04-17 03:45:48	2013-04-18 05:26:44	13005521CF10A	2013-04-17		0	(F3)	Aggravated Assault w/Firearm	0									0					Risk of Recidivism	1	Low	2013-04-17	Risk of Violence	1	Low	2013-04-17	2013-04-17	2013-04-18	0	1
705	jonathan toussaint	jonathan	toussaint	2014-05-30	Male	1995-01-30	21	Less than 25	African-American	0	3	0	0	1	-1	2014-05-29 03:13:53	2014-05-30 04:18:39	14007467CF10A		2014-05-29	1	(F3)	arrest case no charge	0									0					Risk of Recidivism	3	Low	2014-05-30	Risk of Violence	5	Medium	2014-05-30	2014-05-29	2014-05-30	1	0
706	lawrence wiggins	lawrence	wiggins	2014-05-04	Male	1958-08-08	57	Greater than 45	African-American	0	1	0	0	2	-1	2014-05-03 02:00:02	2014-05-04 09:05:27	14006211CF10A	2014-05-03		1	(F1)	Aggrav Child Abuse-Agg Battery	0									0					Risk of Recidivism	1	Low	2014-05-04	Risk of Violence	1	Low	2014-05-04	2014-05-03	2014-05-04	2	0
707	davion silvera	davion	silvera	2013-04-20	Male	1992-06-04	23	Less than 25	African-American	1	6	2	2	6	-1	2013-04-19 04:56:58	2013-04-20 01:49:41	13005638CF10A	2013-04-19		1	(F3)	Driving While License Revoked	1	15010863CF10A	(F3)	0	2015-08-22	False Imprisonment	2015-08-22	2015-08-23		1	15010863CF10A	(M1)	2015-08-22	Battery	Risk of Recidivism	6	Medium	2013-04-20	Risk of Violence	6	Medium	2013-04-20	2013-10-03	2013-10-25	6	0
707	davion silvera	davion	silvera	2013-04-20	Male	1992-06-04	23	Less than 25	African-American	1	6	2	2	6	-1	2013-04-19 04:56:58	2013-04-20 01:49:41	13005638CF10A	2013-04-19		1	(F3)	Driving While License Revoked	1	15010863CF10A	(F3)	0	2015-08-22	False Imprisonment	2015-08-22	2015-08-23		1	15010863CF10A	(M1)	2015-08-22	Battery	Risk of Recidivism	6	Medium	2013-04-20	Risk of Violence	6	Medium	2013-04-20	2015-08-22	2015-08-23	6	188
708	horace tillman	horace	tillman	2014-06-29	Male	1962-03-22	54	Greater than 45	African-American	0	9	0	0	28	-1	2014-06-28 10:26:07	2014-07-04 04:50:37	14008912CF10A	2014-06-28		1	(F3)	Possession of Cocaine	1	14012714MM10A	(M1)	0	2014-08-23	Trespass Other Struct/Convey	2014-08-23	2014-08-25		0					Risk of Recidivism	9	High	2014-06-29	Risk of Violence	5	Medium	2014-06-29	2014-08-23	2014-08-25	28	5
709	trevor dorsey	trevor	dorsey	2014-10-15	Male	1980-11-13	35	25 - 45	African-American	0	7	0	1	8	-1	2014-10-14 03:55:39	2014-10-24 09:06:46	14015069CF10A	2014-10-14		1	(F3)	Felony Battery w/Prior Convict	1	14015663MM10A	(M1)	0	2014-10-29	Viol Pretrial Release Dom Viol	2014-10-29	2014-11-05		0					Risk of Recidivism	7	Medium	2014-10-15	Risk of Violence	4	Low	2014-10-15	2014-10-29	2014-11-05	8	9
710	richard pugliese	richard	pugliese	2014-04-15	Male	1973-10-10	42	25 - 45	Caucasian	0	1	0	0	1	0	2014-04-15 04:15:07	2014-04-16 03:57:47	14005281CF10A	2014-04-15		0	(F3)	Possession of Cocaine	0									0					Risk of Recidivism	1	Low	2014-04-15	Risk of Violence	1	Low	2014-04-15	2014-04-15	2014-04-16	1	1
711	danielle warren	danielle	warren	2014-07-13	Female	1991-08-17	24	Less than 25	African-American	1	9	0	0	6	-1	2014-07-12 06:31:35	2014-08-07 08:23:48	14009548CF10A		2014-07-12	1	(F2)	arrest case no charge	1	15004610CF10A	(M1)	0	2015-04-08	Unlaw Use False Name/Identity	2015-04-08	2015-08-03		0					Risk of Recidivism	9	High	2014-07-13	Risk of Violence	9	High	2014-07-13	2014-12-05	2014-12-08	6	25
711	danielle warren	danielle	warren	2014-07-13	Female	1991-08-17	24	Less than 25	African-American	1	9	0	0	6	-1	2014-07-12 06:31:35	2014-08-07 08:23:48	14009548CF10A		2014-07-12	1	(F2)	arrest case no charge	1	15004610CF10A	(M1)	0	2015-04-08	Unlaw Use False Name/Identity	2015-04-08	2015-08-03		0					Risk of Recidivism	9	High	2014-07-13	Risk of Violence	9	High	2014-07-13	2015-01-02	2015-01-29	6	148
711	danielle warren	danielle	warren	2014-07-13	Female	1991-08-17	24	Less than 25	African-American	1	9	0	0	6	-1	2014-07-12 06:31:35	2014-08-07 08:23:48	14009548CF10A		2014-07-12	1	(F2)	arrest case no charge	1	15004610CF10A	(M1)	0	2015-04-08	Unlaw Use False Name/Identity	2015-04-08	2015-08-03		0					Risk of Recidivism	9	High	2014-07-13	Risk of Violence	9	High	2014-07-13	2015-03-26	2015-03-31	6	200
711	danielle warren	danielle	warren	2014-07-13	Female	1991-08-17	24	Less than 25	African-American	1	9	0	0	6	-1	2014-07-12 06:31:35	2014-08-07 08:23:48	14009548CF10A		2014-07-12	1	(F2)	arrest case no charge	1	15004610CF10A	(M1)	0	2015-04-08	Unlaw Use False Name/Identity	2015-04-08	2015-08-03		0					Risk of Recidivism	9	High	2014-07-13	Risk of Violence	9	High	2014-07-13	2015-04-08	2015-08-03	6	261
712	derrick stephenson	derrick	stephenson	2014-01-16	Male	1962-03-27	54	Greater than 45	African-American	0	1	0	0	2	-26	2013-12-21 05:27:36	2013-12-22 01:10:00	13023551MM10A	2013-12-21		26	(M1)	Battery	0									0					Risk of Recidivism	1	Low	2014-01-16	Risk of Violence	1	Low	2014-01-16	2013-12-21	2013-12-22	2	0
713	dennis williams	dennis	williams	2013-11-24	Male	1958-02-26	58	Greater than 45	African-American	0	6	0	0	12	-1	2013-11-23 08:54:38	2013-11-27 08:50:05	13022024MM10A	2013-11-23		1	(M1)	DUI Level 0.15 Or Minor In Veh	1	14000418MM20A	(M2)	21	2014-01-12	Petit Theft	2014-02-02	2014-03-11		0					Risk of Recidivism	6	Medium	2013-11-24	Risk of Violence	3	Low	2013-11-24	2013-11-23	2013-11-27	12	3
714	jose mata	jose	mata	2014-10-22	Male	1975-08-30	40	25 - 45	Hispanic	0	1	0	0	1	0	2014-10-22 04:09:57	2014-10-23 03:12:35	14039082MU10A	2014-10-22		0	(M1)	DUI - Enhanced	0									0					Risk of Recidivism	1	Low	2014-10-22	Risk of Violence	1	Low	2014-10-22	2015-09-04	2015-09-20	1	1
714	jose mata	jose	mata	2014-10-22	Male	1975-08-30	40	25 - 45	Hispanic	0	1	0	0	1	0	2014-10-22 04:09:57	2014-10-23 03:12:35	14039082MU10A	2014-10-22		0	(M1)	DUI - Enhanced	0									0					Risk of Recidivism	1	Low	2014-10-22	Risk of Violence	1	Low	2014-10-22	2015-09-04	2015-09-20	1	333
715	luis vallejo	luis	vallejo	2014-12-15	Male	1992-07-05	23	Less than 25	Caucasian	0	5	0	1	1	0	2014-12-15 01:06:38	2014-12-15 07:32:18	14016584CF10A	2014-12-14		1	(M1)	Resist/Obstruct W/O Violence	1	15006241CF10A	(F3)	0	2015-05-13	Grand Theft in the 3rd Degree	2015-05-13	2015-05-14		0					Risk of Recidivism	5	Medium	2014-12-15	Risk of Violence	5	Medium	2014-12-15	2015-05-13	2015-05-14	1	0
716	larence brown	larence	brown	2014-03-10	Male	1981-02-12	35	25 - 45	African-American	0	2	0	0	1	-1	2014-03-09 10:01:46	2014-03-10 09:42:18	14004071MM10A	2014-03-09		1	(M1)	Battery	0									0					Risk of Recidivism	2	Low	2014-03-10	Risk of Violence	2	Low	2014-03-10	2014-03-09	2014-03-10	1	0
717	arthur coney	arthur	coney	2014-07-23	Male	1963-03-06	53	Greater than 45	African-American	0	6	0	0	17	222	2015-03-02 12:31:25	2015-09-17 06:24:37	13010825CF10A	2013-08-04		353	(F3)	Felony Battery	0									0					Risk of Recidivism	6	Medium	2014-07-23	Risk of Violence	4	Low	2014-07-23	2015-03-02	2015-09-17	17	0
717	arthur coney	arthur	coney	2014-07-23	Male	1963-03-06	53	Greater than 45	African-American	0	6	0	0	17	222	2015-03-02 12:31:25	2015-09-17 06:24:37	13010825CF10A	2013-08-04		353	(F3)	Felony Battery	0									0					Risk of Recidivism	6	Medium	2014-07-23	Risk of Violence	4	Low	2014-07-23	2015-09-17	2016-02-15	17	572
718	tavon session	tavon	session	2013-11-19	Male	1995-09-20	20	Less than 25	African-American	0	10	0	0	1	0	2013-11-19 02:33:54	2013-11-21 03:37:00	13016073CF10A	2013-11-19		0	(F3)	Fraudulent Use of Credit Card	1	14002743MM10A	(M1)	1	2014-02-16	Unlaw Use False Name/Identity	2014-02-17	2014-02-18		1	15012940CF10A	(F2)	2015-10-06	Agg Flee/Eluding (Injury/Prop Damage)	Risk of Recidivism	10	High	2013-11-19	Risk of Violence	10	High	2013-11-19	2014-02-07	2014-02-08	1	2
718	tavon session	tavon	session	2013-11-19	Male	1995-09-20	20	Less than 25	African-American	0	10	0	0	1	0	2013-11-19 02:33:54	2013-11-21 03:37:00	13016073CF10A	2013-11-19		0	(F3)	Fraudulent Use of Credit Card	1	14002743MM10A	(M1)	1	2014-02-16	Unlaw Use False Name/Identity	2014-02-17	2014-02-18		1	15012940CF10A	(F2)	2015-10-06	Agg Flee/Eluding (Injury/Prop Damage)	Risk of Recidivism	10	High	2013-11-19	Risk of Violence	10	High	2013-11-19	2014-02-07	2014-02-08	1	81
719	brandon ryals	brandon	ryals	2014-04-09	Male	1991-10-17	24	Less than 25	African-American	0	4	0	0	1	-243	2013-08-09 02:50:49	2013-08-10 03:52:45	13011214CF10A	2013-08-09		243	(F3)	Possession of Cannabis	0									0					Risk of Recidivism	4	Low	2014-04-09	Risk of Violence	4	Low	2014-04-09	2013-08-09	2013-08-10	1	0
720	bradley kirker	bradley	kirker	2013-02-04	Male	1964-08-26	51	Greater than 45	Caucasian	0	1	0	0	0	0	2013-02-04 02:44:33	2013-03-11 09:01:18	13001737CF10A	2013-02-04		0	(F3)	Felony Battery (Dom Strang)	0									0					Risk of Recidivism	1	Low	2013-02-04	Risk of Violence	1	Low	2013-02-04	2013-02-04	2013-03-11	0	35
721	christian rivera	christian	rivera	2013-04-27	Male	1991-06-04	24	Less than 25	Hispanic	0	10	0	0	0	0	2013-04-27 02:50:45	2013-04-28 03:43:53	13006075CF10A	2013-04-26		1	(F3)	Poss 3,4 MDMA (Ecstasy)	0									0					Risk of Recidivism	10	High	2013-04-27	Risk of Violence	7	Medium	2013-04-27	2013-04-27	2013-04-28	0	1
722	david levy	david	levy	2013-05-30	Male	1979-03-19	37	25 - 45	Caucasian	0	2	0	0	3	-14	2013-05-16 08:42:26	2013-05-23 06:52:01	13007017CF10A	2013-05-16		14	(F3)	Possession of Cocaine	0									0					Risk of Recidivism	2	Low	2013-05-30	Risk of Violence	1	Low	2013-05-30	2013-05-16	2013-05-23	3	0
723	elcye audatte	elcye	audatte	2014-11-06	Female	1969-06-07	46	Greater than 45	African-American	0	1	0	0	0	-2	2014-11-04 02:28:08	2014-11-06 12:35:02	14014819CF10A	2014-11-03		3	(F2)	Aggrav Battery w/Deadly Weapon	0									0					Risk of Recidivism	1	Low	2014-11-06	Risk of Violence	1	Low	2014-11-06	2014-11-04	2014-11-06	0	0
724	dori klein	dori	klein	2014-02-26	Male	1969-04-17	47	Greater than 45	Caucasian	0	1	0	0	3	-1	2014-02-25 11:20:43	2014-02-26 09:34:42	14002661CF10A	2014-02-25		1	(F3)	Drivg While Lic Suspd/Revk/Can	0									0					Risk of Recidivism	1	Low	2014-02-26	Risk of Violence	1	Low	2014-02-26	2014-02-25	2014-02-26	3	0
725	antuan burgess	antuan	burgess	2014-08-07	Male	1971-07-01	44	25 - 45	African-American	0	4	0	0	3				13013463CF10A		2013-12-13	237	(F2)	arrest case no charge	0									0					Risk of Recidivism	4	Low	2014-08-07	Risk of Violence	6	Medium	2014-08-07	2002-02-12	2003-11-22	3	0
726	christian mansell	christian	mansell	2014-12-24	Male	1982-03-11	34	25 - 45	Caucasian	0	6	0	0	4	-1	2014-12-23 08:14:59	2014-12-24 08:59:44	14016968CF10A	2014-12-23		1	(F3)	Possession of Cannabis	1	15000494MM20A	(M2)		2015-02-04	Susp Drivers Lic 1st Offense				0					Risk of Recidivism	6	Medium	2014-12-24	Risk of Violence	2	Low	2014-12-24	2014-12-23	2014-12-24	4	0
727	kevin connors	kevin	connors	2013-09-03	Male	1959-05-26	56	Greater than 45	Caucasian	0	1	0	0	0	-2	2013-09-01 11:41:31	2013-09-02 08:47:35	13012358CF10A	2013-09-01		2	(F3)	Grand Theft in the 3rd Degree	0									0					Risk of Recidivism	1	Low	2013-09-03	Risk of Violence	1	Low	2013-09-03	2013-09-01	2013-09-02	0	0
728	jason padilla	jason	padilla	2013-12-23	Male	1981-12-19	34	25 - 45	Hispanic	0	1	0	0	4	-1	2013-12-22 11:14:06	2014-01-23 05:54:28	13017638CF10A	2013-12-22		1	(F2)	Burglary Dwelling Occupied	1	14008974MM10A	(M2)	0	2014-06-05	Posses/Disply Susp/Revk/Frd DL	2014-06-05	2014-06-06		0					Risk of Recidivism	1	Low	2013-12-23	Risk of Violence	1	Low	2013-12-23	2014-06-05	2014-06-06	4	31
729	raymond wolf	raymond	wolf	2013-02-25	Male	1956-06-10	59	Greater than 45	Caucasian	0	1	0	0	1	-2	2013-02-23 01:07:25	2013-02-23 09:07:54	13002725CF10A	2013-02-22		3	(F7)	Burglary Dwelling Assault/Batt	1	13019047TC10A	(M2)	73	2013-03-25	Leave Acc/Attend Veh/More $50	2013-06-06	2013-06-14		0					Risk of Recidivism	1	Low	2013-02-25	Risk of Violence	1	Low	2013-02-25	2013-12-18	2013-12-24	1	0
730	cuong do	cuong	do	2013-05-16	Male	1981-03-30	35	25 - 45	Asian	0	6	0	0	0	-1	2013-05-15 03:27:43	2013-08-24 05:06:24	13006952CF10A	2013-05-15		1	(F3)	Burglary Structure Unoccup	0									0					Risk of Recidivism	6	Medium	2013-05-16	Risk of Violence	4	Low	2013-05-16	2013-05-15	2013-08-24	0	100
731	jorge moreno	jorge	moreno	2013-02-07	Male	1957-09-15	58	Greater than 45	Hispanic	0	1	0	0	1	-11	2013-01-27 07:57:13	2013-02-06 10:02:46	13001341CF10A	2013-01-27		11	(F3)	Possession Burglary Tools	0									0					Risk of Recidivism	1	Low	2013-02-07	Risk of Violence	1	Low	2013-02-07	2013-01-27	2013-02-06	1	0
732	richard chacon	richard	chacon	2013-02-06	Male	1986-08-08	29	25 - 45	Hispanic	0	4	0	0	2	-26	2013-01-11 06:07:32	2013-01-12 04:14:13	13000687MM10A	2013-01-11		26	(M1)	Driving Under The Influence	0									0					Risk of Recidivism	4	Low	2013-02-06	Risk of Violence	2	Low	2013-02-06	2013-01-11	2013-01-12	2	0
733	jody kenney	jody	kenney	2014-09-19	Female	1962-06-07	53	Greater than 45	Caucasian	0	1	0	0	1	-23	2014-08-27 08:15:35	2014-09-19 03:46:00	13019131MM10A		2014-08-27	23	(M1)	arrest case no charge	0									0					Risk of Recidivism	1	Low	2014-09-19	Risk of Violence	1	Low	2014-09-19	2014-08-27	2014-09-19	1	0
734	joseph harrison	joseph	harrison	2014-07-31	Male	1981-01-25	35	25 - 45	African-American	0	5	0	0	0	0	2014-07-31 03:57:02	2014-08-07 08:23:56	14010437CF10A	2014-07-31		0	(F3)	Carrying Concealed Firearm	0									0					Risk of Recidivism	5	Medium	2014-07-31	Risk of Violence	3	Low	2014-07-31	2015-01-13	2015-02-04	0	7
734	joseph harrison	joseph	harrison	2014-07-31	Male	1981-01-25	35	25 - 45	African-American	0	5	0	0	0	0	2014-07-31 03:57:02	2014-08-07 08:23:56	14010437CF10A	2014-07-31		0	(F3)	Carrying Concealed Firearm	0									0					Risk of Recidivism	5	Medium	2014-07-31	Risk of Violence	3	Low	2014-07-31	2015-01-13	2015-02-04	0	188
735	giovanni vassallo	giovanni	vassallo	2014-02-27	Male	1986-11-24	29	25 - 45	Caucasian	0	3	0	0	1	-66	2013-12-23 02:32:27	2014-01-29 11:14:01	13009110CF10A		2013-12-23	66	(F3)	arrest case no charge	0									0					Risk of Recidivism	3	Low	2014-02-27	Risk of Violence	5	Medium	2014-02-27	2014-08-26	2014-10-14	1	0
735	giovanni vassallo	giovanni	vassallo	2014-02-27	Male	1986-11-24	29	25 - 45	Caucasian	0	3	0	0	1	-66	2013-12-23 02:32:27	2014-01-29 11:14:01	13009110CF10A		2013-12-23	66	(F3)	arrest case no charge	0									0					Risk of Recidivism	3	Low	2014-02-27	Risk of Violence	5	Medium	2014-02-27	2014-10-14	2015-06-16	1	474
736	sidney altidor	sidney	altidor	2014-08-06	Male	1986-02-01	30	25 - 45	African-American	0	1	0	0	4	-1	2014-08-05 02:13:00	2014-08-06 02:14:42	14011846MM10A	2014-08-05		1	(M1)	Battery	0									0					Risk of Recidivism	1	Low	2014-08-06	Risk of Violence	2	Low	2014-08-06	2014-08-05	2014-08-06	4	0
737	samantha caicedo	samantha	caicedo	2014-04-16	Female	1991-11-01	24	Less than 25	Caucasian	0	9	0	1	6	0	2014-04-16 02:28:47	2014-04-19 11:22:18	14005342CF10A	2014-04-15		1	(F3)	Poss Contr Subst W/o Prescript	1	16001029MM10A	(M1)	0	2016-01-30	Battery	2016-01-30	2016-01-31		1	16001029MM10A	(M1)	2016-01-30	Battery	Risk of Recidivism	9	High	2014-04-16	Risk of Violence	4	Low	2014-04-16	2016-01-30	2016-01-31	6	3
738	justin leal	justin	leal	2013-11-06	Male	1995-01-20	21	Less than 25	Caucasian	0	9	0	4	2	-1	2013-11-05 11:10:50	2013-11-14 01:27:06	13020886MM10A	2013-11-05		1	(M2)	Assault	1	14000150MM20A	(M2)		2013-12-13	Mandatory Susp Possess Alcohol				1	14012093CF10A	(F3)	2014-07-15	Battery on Law Enforc Officer	Risk of Recidivism	9	High	2013-11-06	Risk of Violence	9	High	2013-11-06	2013-11-05	2013-11-14	2	8
739	spencer clayborne	spencer	clayborne	2013-04-10	Male	1989-09-22	26	25 - 45	African-American	0	9	0	0	2				12024513MM10A		2013-03-25	16	(M2)	arrest case no charge	0									0					Risk of Recidivism	9	High	2013-04-10	Risk of Violence	6	Medium	2013-04-10			2	0
740	dung dang	dung	dang	2014-11-21	Male	1965-12-06	50	Greater than 45	Asian	0	7	0	0	5	0	2014-11-21 02:03:06	2014-12-02 08:28:45	14015716CF10A	2014-11-21		0	(F3)	Driving While License Revoked	1	15001443CF10A	(M1)	1	2015-01-30	Unlaw Use False Name/Identity	2015-01-31	2015-04-10		0					Risk of Recidivism	7	Medium	2014-11-21	Risk of Violence	5	Medium	2014-11-21	2014-11-21	2014-12-02	5	11
742	steven turner	steven	turner	2014-08-25	Male	1982-12-27	33	25 - 45	Caucasian	0	9	0	0	0	-3	2014-08-22 03:45:16	2014-08-22 08:06:35	14011477CF10A	2014-08-22		3	(F3)	Possession of Cocaine	0									0					Risk of Recidivism	9	High	2014-08-25	Risk of Violence	7	Medium	2014-08-25	2014-08-22	2014-08-22	0	0
743	courtney brownlee	courtney	brownlee	2013-02-13	Male	1989-10-28	26	25 - 45	African-American	0	2	0	0	1	-1	2013-02-12 03:08:29	2013-02-13 08:21:18	13002167CF10A	2013-02-12		1	(F3)	Cash Item w/Intent to Defraud	0									0					Risk of Recidivism	2	Low	2013-02-13	Risk of Violence	3	Low	2013-02-13	2013-02-12	2013-02-13	1	0
744	bryant brown	bryant	brown	2013-05-22	Male	1967-03-19	49	Greater than 45	African-American	2	7	0	1	18	-1	2013-05-21 01:49:49	2014-02-20 07:00:54	13007245CF10A	2013-05-21		1	(F3)	Possession of Cocaine	0									0					Risk of Recidivism	7	Medium	2013-05-22	Risk of Violence	4	Low	2013-05-22	2014-02-20	2020-01-01	18	1045
745	jessica andujar	jessica	andujar	2013-09-06	Female	1985-12-28	30	25 - 45	Caucasian	0	2	0	0	0	-1	2013-09-05 10:47:19	2013-09-06 11:08:59	13016989MM10A	2013-09-05		1	(M1)	Driving Under The Influence	0									0					Risk of Recidivism	2	Low	2013-09-06	Risk of Violence	2	Low	2013-09-06	2013-09-05	2013-09-06	0	0
746	edward cobb	edward	cobb	2013-03-22	Male	1984-11-25	31	25 - 45	African-American	1	5	0	0	6				13004100CF10A		2013-03-20	2	(F1)	arrest case no charge	0									0					Risk of Recidivism	5	Medium	2013-03-22	Risk of Violence	8	High	2013-03-22	2014-01-28	2020-01-01	6	0
746	edward cobb	edward	cobb	2013-03-22	Male	1984-11-25	31	25 - 45	African-American	1	5	0	0	6				13004100CF10A		2013-03-20	2	(F1)	arrest case no charge	0									0					Risk of Recidivism	5	Medium	2013-03-22	Risk of Violence	8	High	2013-03-22	2014-01-28	2020-01-01	6	1106
747	thomas kraft	thomas	kraft	2014-11-25	Male	1978-09-30	37	25 - 45	Caucasian	0	3	0	0	5	-1	2014-11-24 04:14:25	2014-12-23 05:37:40	14007493CF10A		2014-11-24	1	(F3)	arrest case no charge	0									0					Risk of Recidivism	3	Low	2014-11-25	Risk of Violence	3	Low	2014-11-25	2014-11-24	2014-12-23	5	28
749	linda robbio	linda	robbio	2014-06-04	Female	1956-02-17	60	Greater than 45	Caucasian	0	4	0	0	5	-1	2014-06-03 02:08:58	2014-06-03 01:16:36	14008766MM10A	2014-06-02		2	(M1)	Battery	0									0					Risk of Recidivism	4	Low	2014-06-04	Risk of Violence	1	Low	2014-06-04	2014-06-03	2014-06-03	5	0
750	ruben cotilla	ruben	cotilla	2013-10-01	Male	1986-05-04	29	25 - 45	Caucasian	0	9	0	0	6	-43	2013-08-19 01:15:23	2013-09-06 08:35:02	13003618CF10A		2013-08-19	43	(F3)	arrest case no charge	1	14014420TC40A	(M2)	71	2014-02-26	Driving License Suspended	2014-05-08	2014-07-01		0					Risk of Recidivism	9	High	2013-10-01	Risk of Violence	8	High	2013-10-01	2014-05-08	2014-07-01	6	0
751	luis umana-williams	luis	umana-williams	2014-05-05	Male	1960-12-06	55	Greater than 45	Hispanic	0	1	0	0	0	0	2014-05-05 12:17:22	2014-05-06 05:17:26	14006295CF10A	2014-05-04		1	(F3)	Grand Theft in the 3rd Degree	0									0					Risk of Recidivism	1	Low	2014-05-05	Risk of Violence	1	Low	2014-05-05	2014-05-05	2014-05-06	0	1
752	raymond ondic	raymond	ondic	2014-03-26	Male	1986-08-30	29	25 - 45	Caucasian	0	4	0	0	0	0	2014-03-26 12:14:14	2014-03-27 12:18:56	14005233MM10A	2014-03-25		1	(M1)	Battery	1	14008675MM10A	(M1)	0	2014-05-31	Battery	2014-05-31	2014-06-09		1	14008675MM10A	(M1)	2014-05-31	Battery	Risk of Recidivism	4	Low	2014-03-26	Risk of Violence	4	Low	2014-03-26	2014-05-31	2014-06-09	0	1
753	gregory wilson	gregory	wilson	2013-02-18	Male	1961-08-25	54	Greater than 45	African-American	0	1	0	0	0	-1	2013-02-17 03:23:30	2013-02-18 06:40:01	13003415MM10A	2013-02-17		1	(M1)	Battery	0									0					Risk of Recidivism	1	Low	2013-02-18	Risk of Violence	1	Low	2013-02-18	2013-02-17	2013-02-18	0	0
754	tawfiq hamin	tawfiq	hamin	2013-11-13	Male	1987-01-16	29	25 - 45	African-American	0	4	0	0	4	-1	2013-11-12 01:08:14	2013-11-20 06:26:56	13015733CF10A	2013-11-12		1	(F3)	False Ownership Info/Pawn Item	1	14006688CF10A	(F3)		2014-01-02	Burglary Unoccupied Dwelling				1	14006870MM10A	(M1)	2014-04-24	Battery	Risk of Recidivism	4	Low	2013-11-13	Risk of Violence	4	Low	2013-11-13	2013-11-12	2013-11-20	4	7
755	reginald baptiste	reginald	baptiste	2014-11-15	Male	1987-03-09	29	25 - 45	African-American	0	8	0	0	12	-1	2014-11-14 06:37:03	2014-11-15 11:28:36	14015355CF10A	2014-11-14		1	(F2)	Deliver Cocaine	0									0					Risk of Recidivism	8	High	2014-11-15	Risk of Violence	4	Low	2014-11-15	2015-01-15	2015-01-16	12	0
755	reginald baptiste	reginald	baptiste	2014-11-15	Male	1987-03-09	29	25 - 45	African-American	0	8	0	0	12	-1	2014-11-14 06:37:03	2014-11-15 11:28:36	14015355CF10A	2014-11-14		1	(F2)	Deliver Cocaine	0									0					Risk of Recidivism	8	High	2014-11-15	Risk of Violence	4	Low	2014-11-15	2015-01-15	2015-01-16	12	62
756	deborah zachary	deborah	zachary	2013-10-11	Female	1956-08-18	59	Greater than 45	Caucasian	0	1	0	0	0	-2	2013-10-09 09:01:32	2013-10-10 07:57:22	13019214MM10A	2013-10-09		2	(M1)	DUI Property Damage/Injury	0									0					Risk of Recidivism	1	Low	2013-10-11	Risk of Violence	1	Low	2013-10-11	2013-10-09	2013-10-10	0	0
757	walter anderson	walter	anderson	2013-03-27	Male	1977-11-15	38	25 - 45	African-American	0	5	0	0	0	0	2013-03-27 01:50:02	2013-03-28 08:18:15	13004425CF10A	2013-03-26		1	(F3)	Tampering With Physical Evidence	0									0					Risk of Recidivism	5	Medium	2013-03-27	Risk of Violence	1	Low	2013-03-27	2013-03-27	2013-03-28	0	1
758	xiomara rivera	xiomara	rivera	2013-09-11	Female	1993-12-02	22	Less than 25	Hispanic	0	5	0	0	2	49	2013-10-30 01:49:29	2013-11-18 01:00:50	13007858CF10A	2013-06-03		100	(F3)	Possession of Cocaine	1	15005940MM10A	(M2)	0	2015-05-31	Unlaw LicTag/Sticker Attach	2015-05-31	2015-05-31		0					Risk of Recidivism	5	Medium	2013-09-11	Risk of Violence	4	Low	2013-09-11	2013-10-30	2013-11-18	2	0
758	xiomara rivera	xiomara	rivera	2013-09-11	Female	1993-12-02	22	Less than 25	Hispanic	0	5	0	0	2	49	2013-10-30 01:49:29	2013-11-18 01:00:50	13007858CF10A	2013-06-03		100	(F3)	Possession of Cocaine	1	15005940MM10A	(M2)	0	2015-05-31	Unlaw LicTag/Sticker Attach	2015-05-31	2015-05-31		0					Risk of Recidivism	5	Medium	2013-09-11	Risk of Violence	4	Low	2013-09-11	2015-05-31	2015-05-31	2	68
758	xiomara rivera	xiomara	rivera	2013-09-11	Female	1993-12-02	22	Less than 25	Hispanic	0	5	0	0	2	49	2013-10-30 01:49:29	2013-11-18 01:00:50	13007858CF10A	2013-06-03		100	(F3)	Possession of Cocaine	1	15005940MM10A	(M2)	0	2015-05-31	Unlaw LicTag/Sticker Attach	2015-05-31	2015-05-31		0					Risk of Recidivism	5	Medium	2013-09-11	Risk of Violence	4	Low	2013-09-11	2015-05-31	2015-05-31	2	627
759	robert cortez	robert	cortez	2013-05-13	Male	1989-03-30	27	25 - 45	Caucasian	0	-1	0	0	1	102	2013-08-23 09:11:34	2014-01-07 02:22:59	12000292CF10A	2012-01-06		493	(M1)	Aggravated Assault w/Firearm	0									0					Risk of Recidivism	-1	N/A	2013-05-13	Risk of Violence	-1	N/A	2013-05-13	2013-08-23	2014-01-07	1	0
759	robert cortez	robert	cortez	2013-05-13	Male	1989-03-30	27	25 - 45	Caucasian	0	-1	0	0	1	102	2013-08-23 09:11:34	2014-01-07 02:22:59	12000292CF10A	2012-01-06		493	(M1)	Aggravated Assault w/Firearm	0									0					Risk of Recidivism	-1	N/A	2013-05-13	Risk of Violence	-1	N/A	2013-05-13	2013-08-23	2014-01-07	1	239
760	mark tindall	mark	tindall	2014-09-25	Male	1987-02-11	29	25 - 45	African-American	0	7	0	0	4	-53	2014-08-03 09:45:47	2014-08-29 07:47:26	14010583CF10A		2014-08-03	53	(F3)	arrest case no charge	1	15001709CF10A	(M1)	0	2015-02-05	Resist/Obstruct W/O Violence	2015-02-05	2015-04-23		1	15001709CF10A	(F3)	2015-02-05	Battery on Law Enforc Officer	Risk of Recidivism	7	Medium	2014-09-25	Risk of Violence	6	Medium	2014-09-25	2015-02-05	2015-04-23	4	0
762	cameron berry	cameron	berry	2013-02-21	Male	1988-07-16	27	25 - 45	Caucasian	0	3	0	0	1	-1	2013-02-20 09:27:13	2013-02-21 12:19:53	13007640TC10A	2013-02-20		1	(M1)	Opert With Susp DL 2nd Offens	1	14005658TC10A	(M1)	0	2014-02-12	Opert With Susp DL 2nd Offens	2014-02-12	2014-02-18		0					Risk of Recidivism	3	Low	2013-02-21	Risk of Violence	3	Low	2013-02-21	2014-02-12	2014-02-18	1	0
763	jorge valle	jorge	valle	2014-05-18	Male	1990-04-14	26	25 - 45	Hispanic	0	5	0	0	7	-1	2014-05-17 07:40:21	2014-05-18 09:31:41	14006865CF10A	2014-05-17		1	(F3)	Aggravated Assault W/Dead Weap	1	14016192MM10A	(M1)	0	2014-10-09	Resist/Obstruct W/O Violence	2014-10-09	2014-10-10		0					Risk of Recidivism	5	Medium	2014-05-18	Risk of Violence	5	Medium	2014-05-18	2014-10-09	2014-10-10	7	0
764	luis sanchez	luis	sanchez	2013-04-21	Male	1963-10-26	52	Greater than 45	Hispanic	0	3	0	0	20	-1	2013-04-20 10:15:03	2013-05-18 07:59:38	13005646CF10A	2013-04-20		1	(F2)	False Bomb Report	0									0					Risk of Recidivism	3	Low	2013-04-21	Risk of Violence	1	Low	2013-04-21	2013-08-03	2013-08-06	20	27
764	luis sanchez	luis	sanchez	2013-04-21	Male	1963-10-26	52	Greater than 45	Hispanic	0	3	0	0	20	-1	2013-04-20 10:15:03	2013-05-18 07:59:38	13005646CF10A	2013-04-20		1	(F2)	False Bomb Report	0									0					Risk of Recidivism	3	Low	2013-04-21	Risk of Violence	1	Low	2013-04-21	2013-09-25	2013-09-26	20	107
764	luis sanchez	luis	sanchez	2013-04-21	Male	1963-10-26	52	Greater than 45	Hispanic	0	3	0	0	20	-1	2013-04-20 10:15:03	2013-05-18 07:59:38	13005646CF10A	2013-04-20		1	(F2)	False Bomb Report	0									0					Risk of Recidivism	3	Low	2013-04-21	Risk of Violence	1	Low	2013-04-21	2013-09-25	2013-09-26	20	158
765	henry williams	henry	williams	2013-12-21	Male	1949-09-19	66	Greater than 45	African-American	0	6	0	0	33	0	2013-12-21 12:34:16	2014-01-04 03:41:19	13017585CF10A	2013-12-20		1	(F3)	Crimin Mischief Damage $1000+	1	15000331MM30A	(M1)	173	2015-01-08	Possess Cannabis/20 Grams Or Less	2015-06-30	2015-07-01		0					Risk of Recidivism	6	Medium	2013-12-21	Risk of Violence	2	Low	2013-12-21	2013-12-21	2014-01-04	33	14
768	quincel robinson	quincel	robinson	2014-11-13	Male	1993-05-16	22	Less than 25	African-American	0	10	0	0	0	-1	2014-11-12 10:25:38	2014-11-13 02:06:34	14015203CF10A	2014-11-12		1	(F3)	Grand Theft in the 3rd Degree	0									0					Risk of Recidivism	10	High	2014-11-13	Risk of Violence	5	Medium	2014-11-13	2014-11-12	2014-11-13	0	0
769	zachary libman	zachary	libman	2013-03-09	Male	1989-02-17	27	25 - 45	Caucasian	0	5	0	0	2	0	2013-03-09 02:19:02	2013-03-09 09:06:46	13003509CF10A	2013-03-08		1	(F3)	Possession of Cocaine	0									0					Risk of Recidivism	5	Medium	2013-03-09	Risk of Violence	4	Low	2013-03-09	2013-03-09	2013-03-09	2	0
770	freddy cardona	freddy	cardona	2013-04-22	Male	1965-02-15	51	Greater than 45	Caucasian	0	1	0	0	1	-1	2013-04-21 02:10:18	2013-04-22 03:59:29	13007691MM10A	2013-04-21		1	(M1)	DUI Property Damage/Injury	0									0					Risk of Recidivism	1	Low	2013-04-22	Risk of Violence	1	Low	2013-04-22	2014-09-12	2014-09-12	1	0
770	freddy cardona	freddy	cardona	2013-04-22	Male	1965-02-15	51	Greater than 45	Caucasian	0	1	0	0	1	-1	2013-04-21 02:10:18	2013-04-22 03:59:29	13007691MM10A	2013-04-21		1	(M1)	DUI Property Damage/Injury	0									0					Risk of Recidivism	1	Low	2013-04-22	Risk of Violence	1	Low	2013-04-22	2014-09-12	2014-09-12	1	508
771	robert newton	robert	newton	2013-10-03	Male	1981-01-02	35	25 - 45	Caucasian	0	2	0	0	1	0	2013-10-03 07:44:08	2013-12-16 08:06:46	13013878CF10A		2013-10-03	0	(F3)	arrest case no charge	0									0					Risk of Recidivism	2	Low	2013-10-03	Risk of Violence	3	Low	2013-10-03	2013-10-03	2013-12-16	1	74
772	kenneth gruschow	kenneth	gruschow	2014-11-13	Male	1944-07-20	71	Greater than 45	Caucasian	0	1	0	0	2	-17	2014-10-27 08:59:23	2014-11-01 02:49:58	14015554MM10A	2014-10-27		17	(M1)	Battery	0									0					Risk of Recidivism	1	Low	2014-11-13	Risk of Violence	1	Low	2014-11-13	2014-10-27	2014-11-01	2	0
773	ian dozier	ian	dozier	2014-11-02	Male	1979-11-20	36	25 - 45	African-American	0	1	0	0	0	-1	2014-11-01 11:14:29	2014-11-02 09:11:10	14015832MM10A	2014-11-01		1	(M1)	Battery	0									0					Risk of Recidivism	1	Low	2014-11-02	Risk of Violence	1	Low	2014-11-02	2014-11-01	2014-11-02	0	0
774	james adams	james	adams	2013-08-12	Male	1989-10-12	26	25 - 45	African-American	0	7	0	0	1				09011772CF10A	2009-06-24		1510	(F3)	Tampering With Physical Evidence	0									0					Risk of Recidivism	7	Medium	2013-08-12	Risk of Violence	4	Low	2013-08-12			1	0
775	glen myers	glen	myers	2014-02-03	Male	1963-10-09	52	Greater than 45	Caucasian	0	3	0	0	4	-1	2014-02-02 02:24:43	2014-02-03 01:24:23	14001817MM10A	2014-02-02		1	(M1)	Battery	0									0					Risk of Recidivism	3	Low	2014-02-03	Risk of Violence	2	Low	2014-02-03	2014-02-02	2014-02-03	4	0
777	tibor vittman	tibor	vittman	2014-10-03	Male	1976-04-24	39	25 - 45	Caucasian	0	1	0	0	4	-1	2014-10-02 08:37:13	2014-10-09 12:23:14	14013305CF10A		2014-10-02	1	(F2)	arrest case no charge	0									0					Risk of Recidivism	1	Low	2014-10-03	Risk of Violence	1	Low	2014-10-03	2015-06-15	2015-07-17	4	6
777	tibor vittman	tibor	vittman	2014-10-03	Male	1976-04-24	39	25 - 45	Caucasian	0	1	0	0	4	-1	2014-10-02 08:37:13	2014-10-09 12:23:14	14013305CF10A		2014-10-02	1	(F2)	arrest case no charge	0									0					Risk of Recidivism	1	Low	2014-10-03	Risk of Violence	1	Low	2014-10-03	2015-06-15	2015-07-17	4	287
778	aracelio ramos	aracelio	ramos	2014-06-07	Male	1986-04-13	30	25 - 45	Caucasian	0	5	0	0	1	-1	2014-06-06 01:42:05	2014-06-07 02:01:46	14007844CF10A	2014-06-06		1	(F3)	Aggravated Assault w/Firearm	0									0					Risk of Recidivism	5	Medium	2014-06-07	Risk of Violence	3	Low	2014-06-07	2014-06-06	2014-06-07	1	0
779	monica dunlap	monica	dunlap	2013-05-16	Female	1980-08-27	35	25 - 45	African-American	0	2	0	0	12	-54	2013-03-23 12:31:12	2013-03-23 02:23:21	13012402TC10A	2013-03-22		55	(M2)	Susp Drivers Lic 1st Offense	0									0					Risk of Recidivism	2	Low	2013-05-16	Risk of Violence	1	Low	2013-05-16	2013-07-16	2013-07-16	12	0
779	monica dunlap	monica	dunlap	2013-05-16	Female	1980-08-27	35	25 - 45	African-American	0	2	0	0	12	-54	2013-03-23 12:31:12	2013-03-23 02:23:21	13012402TC10A	2013-03-22		55	(M2)	Susp Drivers Lic 1st Offense	0									0					Risk of Recidivism	2	Low	2013-05-16	Risk of Violence	1	Low	2013-05-16	2013-07-16	2013-07-16	12	61
780	tyophi clay	tyophi	clay	2013-05-07	Male	1990-10-17	25	25 - 45	African-American	2	8	0	1	2	-1	2013-05-06 08:05:23	2013-08-22 06:22:07	13006466CF10A	2013-05-06		1	(F2)	Poss Wep Conv Felon	0									0					Risk of Recidivism	8	High	2013-05-07	Risk of Violence	9	High	2013-05-07	2013-08-22	2020-01-01	2	1060
781	norman joseph	norman	joseph	2013-03-16	Male	1967-06-13	48	Greater than 45	Other	0	5	0	0	12	0	2013-03-16 03:19:01	2013-03-17 08:00:36	13003858CF10A	2013-03-16		0	(F3)	Aggravated Assault w/Firearm	0									0					Risk of Recidivism	5	Medium	2013-03-16	Risk of Violence	4	Low	2013-03-16	2013-03-16	2013-03-17	12	1
782	calvin brown	calvin	brown	2014-02-25	Male	1960-04-30	55	Greater than 45	African-American	0	9	0	0	1	-1	2014-02-24 03:25:48	2014-07-10 06:26:54	14002629CF10A	2014-02-24		1	(F3)	Felony Petit Theft	0									0					Risk of Recidivism	9	High	2014-02-25	Risk of Violence	3	Low	2014-02-25	2014-02-24	2014-07-10	1	135
783	maria argueta	maria	argueta	2014-12-05	Female	1953-09-01	62	Greater than 45	Hispanic	0	1	0	0	0	-1	2014-12-04 05:43:16	2014-12-05 08:30:55	14016144CF10A	2014-12-04		1	(F3)	Grand Theft in the 3rd Degree	0									0					Risk of Recidivism	1	Low	2014-12-05	Risk of Violence	1	Low	2014-12-05	2014-12-04	2014-12-05	0	0
784	stephanie kennedy	stephanie	kennedy	2014-05-01	Female	1982-02-10	34	25 - 45	Caucasian	0	6	0	0	4	-1	2014-04-30 05:56:53	2014-05-20 05:27:23	14005987CF10A	2014-04-30		1	(F3)	Grand Theft in the 3rd Degree	0									0					Risk of Recidivism	6	Medium	2014-05-01	Risk of Violence	2	Low	2014-05-01	2014-04-30	2014-05-20	4	19
785	chaquiay anglin	chaquiay	anglin	2013-10-27	Female	1989-09-18	26	25 - 45	African-American	0	2	0	0	0	-1	2013-10-26 02:28:18	2013-10-27 08:36:51	13020322MM10A	2013-10-26		1	(M1)	Battery	0									0					Risk of Recidivism	2	Low	2013-10-27	Risk of Violence	2	Low	2013-10-27	2013-10-26	2013-10-27	0	0
786	barbara phetakoune	barbara	phetakoune	2014-01-14	Female	1967-10-29	48	Greater than 45	Caucasian	0	1	0	0	0	0	2014-01-14 04:43:41	2014-01-15 03:21:55	14001976MU10A	2014-01-14		0	(M2)	Leave Accd/Attend Veh/Less $50	0									0					Risk of Recidivism	1	Low	2014-01-14	Risk of Violence	1	Low	2014-01-14	2014-01-14	2014-01-15	0	1
787	rayman ruiz	rayman	ruiz	2013-08-27	Male	1985-05-03	30	25 - 45	Hispanic	0	4	0	0	7	-1	2013-08-26 11:08:06	2013-10-03 05:13:08	13016300MM10A	2013-08-26		1	(M1)	Battery	0									0					Risk of Recidivism	4	Low	2013-08-27	Risk of Violence	5	Medium	2013-08-27	2013-08-26	2013-10-03	7	37
788	kareem williams	kareem	williams	2013-11-03	Male	1987-08-02	28	25 - 45	Other	0	1	0	0	2	-1	2013-11-02 05:18:38	2013-11-04 04:03:11	13020690MM10A	2013-11-02		1	(M1)	Battery	0									0					Risk of Recidivism	1	Low	2013-11-03	Risk of Violence	2	Low	2013-11-03	2013-11-02	2013-11-04	2	1
789	oswald mcbride	oswald	mcbride	2013-10-08	Male	1983-02-28	33	25 - 45	African-American	0	3	0	0	2	0	2013-10-08 02:14:25	2013-10-08 11:59:33	13019062MM10A	2013-10-08		0	(M1)	Battery	0									0					Risk of Recidivism	3	Low	2013-10-08	Risk of Violence	3	Low	2013-10-08	2013-12-23	2013-12-24	2	0
789	oswald mcbride	oswald	mcbride	2013-10-08	Male	1983-02-28	33	25 - 45	African-American	0	3	0	0	2	0	2013-10-08 02:14:25	2013-10-08 11:59:33	13019062MM10A	2013-10-08		0	(M1)	Battery	0									0					Risk of Recidivism	3	Low	2013-10-08	Risk of Violence	3	Low	2013-10-08	2013-12-23	2013-12-24	2	77
790	salvatoris williams	salvatoris	williams	2013-04-23	Female	1981-07-19	34	25 - 45	African-American	0	4	0	0	6	-1	2013-04-22 08:12:13	2013-06-13 09:46:00	13005780CF10A	2013-04-22		1	(F3)	Burglary Conveyance Unoccup	0									0					Risk of Recidivism	4	Low	2013-04-23	Risk of Violence	2	Low	2013-04-23	2015-07-05	2015-07-06	6	51
790	salvatoris williams	salvatoris	williams	2013-04-23	Female	1981-07-19	34	25 - 45	African-American	0	4	0	0	6	-1	2013-04-22 08:12:13	2013-06-13 09:46:00	13005780CF10A	2013-04-22		1	(F3)	Burglary Conveyance Unoccup	0									0					Risk of Recidivism	4	Low	2013-04-23	Risk of Violence	2	Low	2013-04-23	2015-07-05	2015-07-06	6	804
791	raven taylor	raven	taylor	2014-10-17	Female	1993-07-14	22	Less than 25	African-American	0	9	0	0	1	-1	2014-10-16 05:01:48	2014-11-04 10:13:36	14008073CF10A		2014-10-16	1	(F3)	arrest case no charge	0									0					Risk of Recidivism	9	High	2014-10-17	Risk of Violence	5	Medium	2014-10-17	2014-10-16	2014-11-04	1	18
792	sastri abhilash	sastri	abhilash	2013-12-20	Male	1991-01-05	25	25 - 45	Other	0	1	0	0	0	0	2013-12-20 03:36:29	2013-12-20 02:06:03	13023510MM10A	2013-12-20		0	(M1)	Possess Cannabis/20 Grams Or Less	0									0					Risk of Recidivism	1	Low	2013-12-20	Risk of Violence	2	Low	2013-12-20	2013-12-20	2013-12-20	0	0
793	sherman dean	sherman	dean	2014-11-06	Male	1956-08-09	59	Greater than 45	African-American	0	7	0	0	10	-1	2014-11-05 07:10:16	2015-03-12 10:11:59	12008376CF10A		2014-11-05	1	(F3)	arrest case no charge	1	16000510MO40A	(MO3)	0	2016-01-06	Carry Open/Uncov Bev In Pub	2016-01-06	2016-01-07		0					Risk of Recidivism	7	Medium	2014-11-06	Risk of Violence	4	Low	2014-11-06	2016-01-06	2016-01-07	10	126
794	carlis mccrea	carlis	mccrea	2014-06-11	Male	1986-08-09	29	25 - 45	African-American	0	5	0	0	5	-1	2014-06-10 04:43:13	2014-06-12 09:19:13	14008044CF10A	2014-06-10		1	(F3)	Poss Contr Subst W/o Prescript	1	14003088MM40A	(M1)		2014-07-02	Possess Cannabis/20 Grams Or Less				0					Risk of Recidivism	5	Medium	2014-06-11	Risk of Violence	3	Low	2014-06-11	2014-06-10	2014-06-12	5	1
795	abid rehman	abid	rehman	2014-09-04	Male	1973-06-02	42	25 - 45	Other	0	1	0	0	0	0	2014-09-04 04:11:34	2014-09-04 08:08:43	14013270MM10A	2014-09-04		0	(M1)	Battery	0									0					Risk of Recidivism	1	Low	2014-09-04	Risk of Violence	1	Low	2014-09-04	2014-09-04	2014-09-04	0	0
796	juan delgado-roger	juan	delgado-roger	2013-04-10	Male	1991-04-30	24	Less than 25	Caucasian	0	2	0	0	0	0	2013-04-10 01:50:54	2013-04-11 07:15:22	13005116CF10A	2013-04-10		0	(F3)	Possession of Cocaine	0									0					Risk of Recidivism	2	Low	2013-04-10	Risk of Violence	3	Low	2013-04-10	2015-01-08	2015-01-14	0	1
796	juan delgado-roger	juan	delgado-roger	2013-04-10	Male	1991-04-30	24	Less than 25	Caucasian	0	2	0	0	0	0	2013-04-10 01:50:54	2013-04-11 07:15:22	13005116CF10A	2013-04-10		0	(F3)	Possession of Cocaine	0									0					Risk of Recidivism	2	Low	2013-04-10	Risk of Violence	3	Low	2013-04-10	2015-01-08	2015-01-14	0	644
797	kevin cabot	kevin	cabot	2014-11-10	Male	1957-12-20	58	Greater than 45	Caucasian	0	1	0	0	0	-1	2014-11-09 01:15:54	2014-11-10 08:03:21	15001159CF10A	2014-11-08		2	(F3)	Felony DUI (level 3)	0									0					Risk of Recidivism	1	Low	2014-11-10	Risk of Violence	1	Low	2014-11-10	2015-02-17	2015-02-20	0	0
797	kevin cabot	kevin	cabot	2014-11-10	Male	1957-12-20	58	Greater than 45	Caucasian	0	1	0	0	0	-1	2014-11-09 01:15:54	2014-11-10 08:03:21	15001159CF10A	2014-11-08		2	(F3)	Felony DUI (level 3)	0									0					Risk of Recidivism	1	Low	2014-11-10	Risk of Violence	1	Low	2014-11-10	2015-02-17	2015-02-20	0	102
798	ernest reed	ernest	reed	2013-03-02	Male	1968-02-02	48	Greater than 45	Caucasian	0	7	0	0	1	-1	2013-03-01 07:50:26	2013-07-08 08:13:11	13003128CF10A	2013-03-01		1	(F2)	Agg Battery Grt/Bod/Harm	1	14004829MM10A	(M2)		2013-12-26	Petit Theft				0					Risk of Recidivism	7	Medium	2013-03-02	Risk of Violence	4	Low	2013-03-02	2013-03-01	2013-07-08	1	128
799	vilma dieppa	vilma	dieppa	2014-06-15	Female	1962-02-15	54	Greater than 45	Caucasian	0	1	0	0	2	0	2014-06-15 03:30:26	2014-06-16 01:18:35	14008282CF10A	2014-06-14		1	(F3)	Resist Officer w/Violence	0									0					Risk of Recidivism	1	Low	2014-06-15	Risk of Violence	1	Low	2014-06-15	2014-06-15	2014-06-16	2	1
800	leroy ware	leroy	ware	2013-02-08	Male	1960-06-07	55	Greater than 45	African-American	0	8	0	0	0	61	2013-04-10 01:10:20	2013-05-25 07:54:19	13002796MM10A	2013-02-07		1	(M1)	Battery	1	13005155CF10A	(F3)	0	2013-04-10	Battery on a Person Over 65	2013-04-10	2013-05-25		1	13005155CF10A	(F3)	2013-04-10	Battery on a Person Over 65	Risk of Recidivism	8	High	2013-02-08	Risk of Violence	4	Low	2013-02-08	2013-04-10	2013-05-25	0	0
801	jamaal mccrea	jamaal	mccrea	2014-06-02	Male	1986-02-02	30	25 - 45	African-American	0	2	0	1	0	0	2014-06-02 03:57:39	2014-06-04 04:35:30	14008757MM10A	2014-06-02		0	(M1)	Battery	0									0					Risk of Recidivism	2	Low	2014-06-02	Risk of Violence	2	Low	2014-06-02	2014-06-02	2014-06-04	0	2
802	angelo ramos	angelo	ramos	2014-06-29	Male	1991-10-23	24	Less than 25	Caucasian	0	5	0	0	3	-214	2013-11-27 04:57:52	2013-11-28 02:47:36	14008917CF10A	2014-06-28		1	(F2)	Burglary Unoccupied Dwelling	0									0					Risk of Recidivism	5	Medium	2014-06-29	Risk of Violence	6	Medium	2014-06-29	2013-11-27	2013-11-28	3	0
803	kelvin jones	kelvin	jones	2014-01-21	Male	1964-04-07	52	Greater than 45	African-American	0	5	0	0	4	0	2014-01-21 01:50:50	2014-01-22 02:48:22	14002400MU10A	2014-01-21		0	(M2)	Fail Register Vehicle	0									0					Risk of Recidivism	5	Medium	2014-01-21	Risk of Violence	3	Low	2014-01-21	2014-01-21	2014-01-22	4	1
804	covaney graham	covaney	graham	2014-10-18	Male	1995-06-12	20	Less than 25	African-American	0	4	0	0	0	0	2014-10-18 01:22:59	2014-10-18 08:58:59	14014082CF10A	2014-10-17		1	(F3)	Possession of Ethylone	1	15006968MM10A	(M1)	0	2015-06-08	Resist/Obstruct W/O Violence	2015-06-08	2015-06-09		0					Risk of Recidivism	4	Low	2014-10-18	Risk of Violence	6	Medium	2014-10-18	2015-06-08	2015-06-09	0	0
805	zachary premock	zachary	premock	2014-05-15	Male	1990-11-23	25	25 - 45	Caucasian	0	4	0	0	4	-5	2014-05-10 01:35:17	2014-05-15 10:32:57	14006509CF10A	2014-05-09		6	(F3)	Possession of Cocaine	1	14077767TC20A	(M2)		2014-11-04	Susp Drivers Lic 1st Offense				0					Risk of Recidivism	4	Low	2014-05-15	Risk of Violence	3	Low	2014-05-15	2014-05-10	2014-05-15	4	0
806	mckenzie reijonen	mckenzie	reijonen	2013-01-02	Male	1991-07-18	24	Less than 25	Caucasian	0	2	0	0	0	-1	2013-01-01 05:32:16	2013-01-16 06:22:12	13000034CF10A	2013-01-01		1	(F2)	Agg Battery Grt/Bod/Harm	0									0					Risk of Recidivism	2	Low	2013-01-02	Risk of Violence	3	Low	2013-01-02	2013-01-01	2013-01-16	0	14
807	mauro perez	mauro	perez	2013-01-20	Male	1993-03-15	23	Less than 25	Caucasian	0	9	0	0	0	-1	2013-01-19 07:06:05	2013-01-20 12:29:47	13001351MM10A	2013-01-19		1	(M1)	Battery	0									0					Risk of Recidivism	9	High	2013-01-20	Risk of Violence	6	Medium	2013-01-20	2016-01-28	2020-01-01	0	0
807	mauro perez	mauro	perez	2013-01-20	Male	1993-03-15	23	Less than 25	Caucasian	0	9	0	0	0	-1	2013-01-19 07:06:05	2013-01-20 12:29:47	13001351MM10A	2013-01-19		1	(M1)	Battery	0									0					Risk of Recidivism	9	High	2013-01-20	Risk of Violence	6	Medium	2013-01-20	2016-01-28	2020-01-01	0	1167
808	andrew thomas	andrew	thomas	2013-10-19	Male	1988-05-02	27	25 - 45	Caucasian	0	4	1	3	6	-1	2013-10-18 01:19:43	2013-10-19 08:00:03	13014603CF10A	2013-10-18		1	(F3)	Felony Battery (Dom Strang)	1	16002005CF10A	(F3)		2016-01-08	Grand Theft in the 3rd Degree				0					Risk of Recidivism	4	Low	2013-10-19	Risk of Violence	3	Low	2013-10-19	2016-01-10	2016-01-11	6	0
809	jerry isaacs	jerry	isaacs	2014-11-21	Male	1962-05-12	53	Greater than 45	African-American	0	1	0	0	1	0	2014-11-21 02:54:37	2014-11-21 09:14:51	14015700CF10A	2014-11-21		0	(F3)	Possession of Cocaine	0									0					Risk of Recidivism	1	Low	2014-11-21	Risk of Violence	1	Low	2014-11-21	2014-11-21	2014-11-21	1	0
810	donovan sheffield	donovan	sheffield	2014-06-13	Male	1990-12-01	25	25 - 45	African-American	0	3	1	0	1	-1	2014-06-12 12:59:13	2014-06-13 08:53:42	14009329MM10A	2014-06-11		2	(M1)	Battery	1	15000662MM40A	(M1)		2015-01-23	Possess Cannabis/20 Grams Or Less				0					Risk of Recidivism	3	Low	2014-06-13	Risk of Violence	3	Low	2014-06-13	2016-03-18	2016-03-19	1	0
811	marie belfleur	marie	belfleur	2014-10-21	Female	1986-12-16	29	25 - 45	Other	0	2	0	0	0	-1	2014-10-20 03:57:47	2014-10-21 02:10:47	14014158CF10A	2014-10-20		1	(F3)	Grand Theft in the 3rd Degree	0									0					Risk of Recidivism	2	Low	2014-10-21	Risk of Violence	2	Low	2014-10-21	2014-10-20	2014-10-21	0	0
812	antwon hyman	antwon	hyman	2013-08-17	Male	1984-09-04	31	25 - 45	African-American	0	2	0	0	0	-1	2013-08-16 06:01:59	2013-08-16 06:08:13	13011507CF10A	2013-08-16		1	(F3)	Trespassing/Construction Site	0									0					Risk of Recidivism	2	Low	2013-08-17	Risk of Violence	1	Low	2013-08-17	2013-08-16	2013-08-16	0	0
813	mark singletary	mark	singletary	2014-04-13	Male	1990-12-31	25	25 - 45	African-American	0	4	1	0	6	-1	2014-04-12 01:03:26	2014-04-16 08:49:06	14005145CF10A		2014-04-11	2	(F3)	arrest case no charge	1	14078804TC20A	(M2)	0	2014-11-07	Driving License Suspended	2014-11-07	2014-11-17		0					Risk of Recidivism	4	Low	2014-04-13	Risk of Violence	5	Medium	2014-04-13	2014-11-07	2014-11-17	6	3
814	benjamin levine	benjamin	levine	2014-01-21	Male	1983-06-11	32	25 - 45	Caucasian	0	1	0	0	1	-7	2014-01-14 10:07:59	2014-01-15 01:58:04	14000604CF10A		2014-01-14	7	(F2)	arrest case no charge	1	15008433MM10A	(M1)	0	2015-08-09	Battery	2015-08-09	2015-08-10		1	15008433MM10A	(M1)	2015-08-09	Battery	Risk of Recidivism	1	Low	2014-01-21	Risk of Violence	2	Low	2014-01-21	2015-08-09	2015-08-10	1	0
815	scott johnson	scott	johnson	2014-04-07	Male	1994-05-09	21	Less than 25	Caucasian	0	3	0	0	0	-1	2014-04-06 12:28:23	2014-04-06 02:30:38	14004711CF10A	2014-04-05		2	(F3)	Grand Theft in the 3rd Degree	1	15018043TC20A	(M2)		2015-01-27	Racing On Highway				0					Risk of Recidivism	3	Low	2014-04-07	Risk of Violence	5	Medium	2014-04-07	2014-04-06	2014-04-06	0	0
816	robert dey	robert	dey	2014-03-04	Male	1970-07-14	45	Greater than 45	Caucasian	0	5	0	0	10	-1	2014-03-03 11:42:26	2014-03-14 10:14:59	14004518CF10A	2014-03-03		1	(F3)	Felony Battery w/Prior Convict	0									0					Risk of Recidivism	5	Medium	2014-03-04	Risk of Violence	7	Medium	2014-03-04	2014-08-19	2014-10-14	10	10
816	robert dey	robert	dey	2014-03-04	Male	1970-07-14	45	Greater than 45	Caucasian	0	5	0	0	10	-1	2014-03-03 11:42:26	2014-03-14 10:14:59	14004518CF10A	2014-03-03		1	(F3)	Felony Battery w/Prior Convict	0									0					Risk of Recidivism	5	Medium	2014-03-04	Risk of Violence	7	Medium	2014-03-04	2014-10-28	2015-04-23	10	224
816	robert dey	robert	dey	2014-03-04	Male	1970-07-14	45	Greater than 45	Caucasian	0	5	0	0	10	-1	2014-03-03 11:42:26	2014-03-14 10:14:59	14004518CF10A	2014-03-03		1	(F3)	Felony Battery w/Prior Convict	0									0					Risk of Recidivism	5	Medium	2014-03-04	Risk of Violence	7	Medium	2014-03-04	2014-10-28	2015-04-23	10	415
817	arrantes green	arrantes	green	2013-02-21	Male	1978-05-16	37	25 - 45	Other	0	1	0	0	1	-1	2013-02-20 08:05:01	2013-02-25 09:11:42	13002589CF10A	2013-02-20		1	(F3)	Crim Use of Personal ID Info	0									0					Risk of Recidivism	1	Low	2013-02-21	Risk of Violence	1	Low	2013-02-21	2013-02-20	2013-02-25	1	4
818	frantz mersier	frantz	mersier	2013-12-08	Male	1990-06-01	25	25 - 45	Caucasian	0	3	0	0	0	0	2013-12-08 01:39:45	2013-12-08 01:45:29	13016946CF10A	2013-12-07		1	(F3)	Possession of Cannabis	0									0					Risk of Recidivism	3	Low	2013-12-08	Risk of Violence	4	Low	2013-12-08	2014-02-12	2014-02-27	0	0
818	frantz mersier	frantz	mersier	2013-12-08	Male	1990-06-01	25	25 - 45	Caucasian	0	3	0	0	0	0	2013-12-08 01:39:45	2013-12-08 01:45:29	13016946CF10A	2013-12-07		1	(F3)	Possession of Cannabis	0									0					Risk of Recidivism	3	Low	2013-12-08	Risk of Violence	4	Low	2013-12-08	2014-02-12	2014-02-27	0	81
819	jaheel dyer	jaheel	dyer	2014-07-02	Male	1995-02-19	21	Less than 25	African-American	0	3	0	0	0	0	2014-07-02 02:25:15	2014-07-02 08:24:48	14010222MM10A	2014-07-02		0	(M1)	Battery	0									0					Risk of Recidivism	3	Low	2014-07-02	Risk of Violence	6	Medium	2014-07-02	2014-07-02	2014-07-02	0	0
820	terrance holland	terrance	holland	2013-01-01	Male	1984-01-11	32	25 - 45	Hispanic	1	10	1	0	20	0	2013-01-01 05:08:53	2013-01-02 03:08:56	12017968CF10A		2013-01-01	0	(F3)	arrest case no charge	0									0					Risk of Recidivism	10	High	2013-01-01	Risk of Violence	7	Medium	2013-01-01	2013-01-01	2013-01-02	20	1
821	dorcas willis	dorcas	willis	2013-04-25	Male	1980-08-31	35	25 - 45	African-American	0	7	0	0	0	-1	2013-04-24 07:43:40	2013-04-26 08:46:06	13005883CF10A	2013-04-24		1	(F3)	Grand Theft in the 3rd Degree	0									0					Risk of Recidivism	7	Medium	2013-04-25	Risk of Violence	2	Low	2013-04-25	2013-04-24	2013-04-26	0	1
822	carey daub	carey	daub	2014-09-11	Male	1981-07-09	34	25 - 45	Caucasian	1	10	0	0	28	-86	2014-06-17 12:22:33	2014-09-11 11:26:21	14008357CF10A	2014-06-17		86	(F3)	Driving While License Revoked	0									0					Risk of Recidivism	10	High	2014-09-11	Risk of Violence	5	Medium	2014-09-11	2014-06-17	2014-09-11	28	0
823	sammie williams	sammie	williams	2014-02-09	Male	1973-04-26	42	25 - 45	African-American	0	7	0	0	14	-1	2014-02-08 09:03:23	2014-02-10 02:33:36	14001806CF10A	2014-02-08		1	(F3)	Drivg While Lic Suspd/Revk/Can	1	14004051CF10A	(F3)	0	2014-03-22	Driving While License Revoked	2014-03-22	2014-05-29		0					Risk of Recidivism	7	Medium	2014-02-09	Risk of Violence	6	Medium	2014-02-09	2014-03-22	2014-05-29	14	1
825	alexander marino	alexander	marino	2013-09-09	Male	1991-07-20	24	Less than 25	Caucasian	0	10	0	1	9	-23	2013-08-17 01:46:04	2013-08-27 03:55:32	13015605MM10A	2013-08-17		23	(M1)	Viol Injunct Domestic Violence	1	13014469CF10A	(F3)	0	2013-10-16	Possession Burglary Tools	2013-10-16	2014-10-06		1	16002201CF10A	(F2)	2016-02-19	Aggrav Battery w/Deadly Weapon	Risk of Recidivism	10	High	2013-09-09	Risk of Violence	8	High	2013-09-09	2013-10-16	2014-10-06	9	0
826	sara voss	sara	voss	2014-10-30	Female	1989-09-18	26	25 - 45	Caucasian	0	2	0	0	1	-1	2014-10-29 07:15:19	2014-10-30 08:46:23	14014516CF10A	2014-10-29		1	(F3)	Uttering a Forged Instrument	0									0					Risk of Recidivism	2	Low	2014-10-30	Risk of Violence	2	Low	2014-10-30	2014-10-29	2014-10-30	1	0
827	david adrien	david	adrien	2014-07-06	Male	1980-12-18	35	25 - 45	African-American	0	7	0	0	6	-1	2014-07-05 02:12:03	2014-09-13 11:39:38	14010320MM10A	2014-07-05		1	(M1)	Battery	0									0					Risk of Recidivism	7	Medium	2014-07-06	Risk of Violence	3	Low	2014-07-06	2014-11-10	2015-01-30	6	69
827	david adrien	david	adrien	2014-07-06	Male	1980-12-18	35	25 - 45	African-American	0	7	0	0	6	-1	2014-07-05 02:12:03	2014-09-13 11:39:38	14010320MM10A	2014-07-05		1	(M1)	Battery	0									0					Risk of Recidivism	7	Medium	2014-07-06	Risk of Violence	3	Low	2014-07-06	2014-11-10	2015-01-30	6	208
828	ashley baer	ashley	baer	2014-11-13	Female	1989-04-29	26	25 - 45	Caucasian	0	9	0	0	0	-1	2014-11-12 09:58:59	2014-12-15 08:48:06	14015196CF10A	2014-11-12		1	(F3)	Possession Of Heroin	0									0					Risk of Recidivism	9	High	2014-11-13	Risk of Violence	9	High	2014-11-13	2014-11-12	2014-12-15	0	32
829	jordan torres	jordan	torres	2014-07-15	Male	1993-05-15	22	Less than 25	Caucasian	1	10	0	4	6	168	2014-12-30 03:25:32	2015-03-02 11:38:08	13015457CF10A	2013-11-06		251	(F3)	Possession of Cocaine	1	14097534TC30A	(M2)	32	2014-11-28	Susp Drivers Lic 1st Offense	2014-12-30	2015-03-02		0					Risk of Recidivism	10	High	2014-07-15	Risk of Violence	10	High	2014-07-15	2014-12-30	2015-03-02	6	0
830	justin gomez	justin	gomez	2013-08-24	Male	1994-11-24	21	Less than 25	Hispanic	0	6	0	0	0	-1	2013-08-23 09:06:45	2013-08-24 08:56:18	13011897CF10A	2013-08-23		1	(F3)	Grand Theft in the 3rd Degree	1	14000125MM20A	(M2)	153	2013-12-18	Petit Theft	2014-05-20	2014-05-22		0					Risk of Recidivism	6	Medium	2013-08-24	Risk of Violence	9	High	2013-08-24	2014-08-01	2015-03-03	0	0
831	malcolm austin	malcolm	austin	2013-03-20	Male	1968-10-11	47	Greater than 45	Caucasian	0	1	0	0	1	0	2013-03-20 02:25:51	2013-03-20 07:51:16	13005458MM10A	2013-03-19		1	(M1)	Battery	0									0					Risk of Recidivism	1	Low	2013-03-20	Risk of Violence	1	Low	2013-03-20	2013-03-20	2013-03-20	1	0
832	edward wright	edward	wright	2014-04-07	Male	1944-05-06	71	Greater than 45	Caucasian	0	1	0	0	0	-1	2014-04-06 12:20:20	2014-04-07 02:08:08	14005863MM10A	2014-04-06		1	(M1)	Battery	0									0					Risk of Recidivism	1	Low	2014-04-07	Risk of Violence	1	Low	2014-04-07	2014-04-06	2014-04-07	0	0
833	robyn willis	robyn	willis	2014-07-10	Female	1995-01-02	21	Less than 25	African-American	0	4	0	0	0	-1	2014-07-09 06:08:29	2014-07-10 01:41:42	14009410CF10A	2014-07-09		1	(M1)	Aggravated Assault W/Dead Weap	0									0					Risk of Recidivism	4	Low	2014-07-10	Risk of Violence	5	Medium	2014-07-10	2014-07-09	2014-07-10	0	0
834	stephen krupski	stephen	krupski	2014-04-29	Male	1948-01-16	68	Greater than 45	Caucasian	0	1	0	0	0	0	2014-04-29 02:30:27	2014-04-30 02:57:12	14016504MU10A	2014-04-29		0	(M2)	Driving Under The Influence	0									0					Risk of Recidivism	1	Low	2014-04-29	Risk of Violence	1	Low	2014-04-29	2014-04-29	2014-04-30	0	1
835	denzil woodcock	denzil	woodcock	2014-03-21	Male	1988-12-15	27	25 - 45	African-American	0	9	0	0	5	-1	2014-03-20 02:19:43	2014-03-21 07:57:16	14003953CF10A	2014-03-20		1	(F2)	Aggrav Battery w/Deadly Weapon	1	15021096TC10A	(M2)	0	2015-07-18	Operating W/O Valid License	2015-07-18	2015-07-18		0					Risk of Recidivism	9	High	2014-03-21	Risk of Violence	7	Medium	2014-03-21	2015-07-18	2015-07-18	5	0
835	denzil woodcock	denzil	woodcock	2014-03-21	Male	1988-12-15	27	25 - 45	African-American	0	9	0	0	5	-1	2014-03-20 02:19:43	2014-03-21 07:57:16	14003953CF10A	2014-03-20		1	(F2)	Aggrav Battery w/Deadly Weapon	1	15021096TC10A	(M2)	0	2015-07-18	Operating W/O Valid License	2015-07-18	2015-07-18		0					Risk of Recidivism	9	High	2014-03-21	Risk of Violence	7	Medium	2014-03-21	2015-07-18	2015-07-18	5	484
836	milton martin	milton	martin	2014-10-15	Male	1972-12-12	43	25 - 45	Hispanic	0	1	0	0	2	-12	2014-10-03 04:35:53	2014-10-07 09:34:35	14035950MU10A	2014-10-03		12	(M1)	DUI Level 0.15 Or Minor In Veh	1	14074516TC20A	(M2)	228	2014-10-16	Susp Drivers Lic 1st Offense	2015-06-01	2015-06-05		0					Risk of Recidivism	1	Low	2014-10-15	Risk of Violence	1	Low	2014-10-15	2015-06-01	2015-06-05	2	0
837	dean lietzau	dean	lietzau	2013-11-17	Male	1969-06-10	46	Greater than 45	Caucasian	0	6	0	0	2	-1	2013-11-16 09:37:06	2013-11-17 08:25:25	13015937CF10A	2013-11-16		1	(F3)	Possession Of Alprazolam	1	14003780MM40A	(M1)	143	2014-08-23	Petit Theft $100- $300	2015-01-13	2015-01-13		0					Risk of Recidivism	6	Medium	2013-11-17	Risk of Violence	1	Low	2013-11-17	2015-10-01	2015-10-02	2	0
838	derrick goodley	derrick	goodley	2013-01-29	Male	1971-11-14	44	25 - 45	African-American	0	3	0	0	1	0	2013-01-29 06:36:33	2013-01-29 08:34:07	13002096MM10A	2013-01-29		0	(M2)	Reckless Driving	0									0					Risk of Recidivism	3	Low	2013-01-29	Risk of Violence	1	Low	2013-01-29	2013-01-29	2013-01-29	1	0
839	genevieve fitzpatrick	genevieve	fitzpatrick	2014-08-25	Female	1976-10-10	39	25 - 45	Caucasian	0	1	0	0	0	-1	2014-08-24 08:16:51	2014-08-25 01:31:58	14011537CF10A	2014-08-24		1	(F2)	Aggrav Battery w/Deadly Weapon	0									0					Risk of Recidivism	1	Low	2014-08-25	Risk of Violence	1	Low	2014-08-25	2014-08-24	2014-08-25	0	0
840	rafael rivera	rafael	rivera	2013-04-17	Male	1988-07-05	27	25 - 45	African-American	0	5	0	0	0				13005535CF10A	2013-04-16		1	(F1)	Consp Traff Oxycodone 28g><30k	0									0					Risk of Recidivism	5	Medium	2013-04-17	Risk of Violence	5	Medium	2013-04-17			0	0
841	cesar pedraza	cesar	pedraza	2013-12-13	Male	1993-03-25	23	Less than 25	Caucasian	0	2	0	0	2	-1	2013-12-12 11:10:00	2013-12-13 08:47:02	13017191CF10A	2013-12-12		1	(F3)	Possession of Cannabis	0									0					Risk of Recidivism	2	Low	2013-12-13	Risk of Violence	3	Low	2013-12-13	2013-12-12	2013-12-13	2	0
842	ana cuba	ana	cuba	2013-02-13	Female	1965-12-30	50	Greater than 45	Hispanic	0	1	0	0	1				12002463CF10A	2009-07-04		1320	(F3)	Unemployment Compensatn Fraud	0									0					Risk of Recidivism	1	Low	2013-02-13	Risk of Violence	1	Low	2013-02-13			1	0
843	richard harding	richard	harding	2013-10-03	Male	1973-09-28	42	25 - 45	African-American	0	5	0	0	8	-1	2013-10-02 10:41:22	2013-10-04 05:24:16	13007224CF10A		2013-10-02	1	(F3)	arrest case no charge	0									0					Risk of Recidivism	5	Medium	2013-10-03	Risk of Violence	2	Low	2013-10-03	2013-10-02	2013-10-04	8	1
844	benjamin feast	benjamin	feast	2013-05-22	Male	1957-10-13	58	Greater than 45	African-American	0	6	0	0	6	-1	2013-05-21 03:25:30	2013-10-12 05:17:10	13007238CF10A	2013-05-21		1	(F3)	Felony Petit Theft	0									0					Risk of Recidivism	6	Medium	2013-05-22	Risk of Violence	3	Low	2013-05-22	2014-10-15	2014-12-12	6	143
844	benjamin feast	benjamin	feast	2013-05-22	Male	1957-10-13	58	Greater than 45	African-American	0	6	0	0	6	-1	2013-05-21 03:25:30	2013-10-12 05:17:10	13007238CF10A	2013-05-21		1	(F3)	Felony Petit Theft	0									0					Risk of Recidivism	6	Medium	2013-05-22	Risk of Violence	3	Low	2013-05-22	2014-10-15	2014-12-12	6	569
845	richard irons	richard	irons	2014-07-03	Male	1991-04-25	24	Less than 25	African-American	0	3	0	0	0	-1	2014-07-02 01:14:28	2014-07-03 08:49:40	14010216MM10A	2014-07-02		1	(M1)	Battery	0									0					Risk of Recidivism	3	Low	2014-07-03	Risk of Violence	4	Low	2014-07-03	2014-07-02	2014-07-03	0	0
846	varon reckley	varon	reckley	2014-04-25	Male	1967-01-29	49	Greater than 45	African-American	0	7	0	0	15	-107	2014-01-08 03:42:48	2014-04-25 11:16:46	14000316CF10A		2014-02-05	79	(F3)	arrest case no charge	0									0					Risk of Recidivism	7	Medium	2014-04-25	Risk of Violence	7	Medium	2014-04-25	2016-04-13	2016-04-14	15	0
846	varon reckley	varon	reckley	2014-04-25	Male	1967-01-29	49	Greater than 45	African-American	0	7	0	0	15	-107	2014-01-08 03:42:48	2014-04-25 11:16:46	14000316CF10A		2014-02-05	79	(F3)	arrest case no charge	0									0					Risk of Recidivism	7	Medium	2014-04-25	Risk of Violence	7	Medium	2014-04-25	2016-04-13	2016-04-14	15	720
847	steven nettleford	steven	nettleford	2013-01-25	Male	1990-02-13	26	25 - 45	African-American	0	6	0	1	3	-1	2013-01-24 09:05:00	2013-01-26 04:55:47	13001179CF10A	2013-01-24		1	(F3)	Grand Theft (Motor Vehicle)	1	15008815CF10A	(F3)	0	2015-07-09	Poss Pyrrolidinovalerophenone	2015-07-09	2015-10-18		0					Risk of Recidivism	6	Medium	2013-01-25	Risk of Violence	4	Low	2013-01-25	2015-07-09	2015-10-18	3	1
848	eva downs	eva	downs	2013-02-04	Female	1968-02-07	48	Greater than 45	Other	0	1	0	0	0	-1	2013-02-03 10:36:16	2013-02-20 12:12:55	13001821CF10A	2013-02-03		1	(F3)	Grand Theft in the 3rd Degree	0									0					Risk of Recidivism	1	Low	2013-02-04	Risk of Violence	1	Low	2013-02-04	2013-02-03	2013-02-20	0	16
849	abdul leiba	abdul	leiba	2013-10-30	Male	1976-09-11	39	25 - 45	African-American	0	3	0	0	3	-1	2013-10-29 05:34:04	2013-11-01 05:49:33	13015098CF10A	2013-10-29		1	(F3)	Grand Theft in the 3rd Degree	1	14007250CF10A	(M2)	0	2014-05-24	Susp Drivers Lic 1st Offense	2014-05-24	2014-05-26		0					Risk of Recidivism	3	Low	2013-10-30	Risk of Violence	2	Low	2013-10-30	2014-05-24	2014-05-26	3	2
850	deandre miller	deandre	miller	2013-05-15	Male	1995-03-26	21	Less than 25	African-American	0	5	2	0	3	0	2013-05-15 12:34:33	2013-05-15 07:01:43	13006891CF10A		2013-05-14	1	(F2)	arrest case no charge	1	14010145CF10A	(F3)	0	2014-07-25	Grand Theft in the 3rd Degree	2014-07-25	2014-09-04		1	15008351CF10A	(F2)	2015-06-29	Robbery / No Weapon	Risk of Recidivism	5	Medium	2013-05-15	Risk of Violence	6	Medium	2013-05-15	2014-07-25	2014-09-04	3	0
851	keith antolick	keith	antolick	2014-01-31	Male	1952-06-19	63	Greater than 45	Caucasian	0	1	0	0	1	-9	2014-01-22 10:01:17	2014-01-28 03:54:00	14002640MU10A	2014-01-22		9	(M1)	DUI Property Damage/Injury	0									0					Risk of Recidivism	1	Low	2014-01-31	Risk of Violence	1	Low	2014-01-31	2014-01-22	2014-01-28	1	0
852	tyrone carter	tyrone	carter	2013-11-18	Male	1993-11-05	22	Less than 25	African-American	0	7	1	0	3	-11	2013-11-07 10:41:34	2013-11-15 08:48:23	12016330CF10A		2013-11-07	11	(F2)	arrest case no charge	1	15005819CF10A	(F3)		2015-05-04	Burglary Conveyance Unoccup				1	15006218CF10A	(F3)	2015-05-11	Felony Battery (Dom Strang)	Risk of Recidivism	7	Medium	2013-11-18	Risk of Violence	7	Medium	2013-11-18	2013-11-07	2013-11-15	3	0
853	david schultz	david	schultz	2013-02-03	Male	1965-09-25	50	Greater than 45	African-American	0	3	0	0	3	-1	2013-02-02 09:08:31	2013-02-03 06:57:55	13002401MM10A	2013-02-02		1	(M1)	Battery	0									0					Risk of Recidivism	3	Low	2013-02-03	Risk of Violence	2	Low	2013-02-03	2013-02-02	2013-02-03	3	0
855	geoffrey salesman	geoffrey	salesman	2013-05-27	Male	1977-07-18	38	25 - 45	African-American	0	1	0	0	0	-1	2013-05-26 10:41:56	2013-06-05 09:47:42	13007530CF10A	2013-05-26		1	(F7)	Burglary Dwelling Assault/Batt	0									0					Risk of Recidivism	1	Low	2013-05-27	Risk of Violence	1	Low	2013-05-27	2013-05-26	2013-06-05	0	9
856	osvaldo pereyra	osvaldo	pereyra	2013-10-22	Male	1974-06-23	41	25 - 45	Caucasian	0	6	0	0	1	-6	2013-10-16 03:27:50	2013-10-22 10:32:34	13014495CF10A	2013-10-15		7	(F2)	Sexual Battery / Vict 12 Yrs +	0									0					Risk of Recidivism	6	Medium	2013-10-22	Risk of Violence	4	Low	2013-10-22	2013-11-27	2013-12-02	1	0
856	osvaldo pereyra	osvaldo	pereyra	2013-10-22	Male	1974-06-23	41	25 - 45	Caucasian	0	6	0	0	1	-6	2013-10-16 03:27:50	2013-10-22 10:32:34	13014495CF10A	2013-10-15		7	(F2)	Sexual Battery / Vict 12 Yrs +	0									0					Risk of Recidivism	6	Medium	2013-10-22	Risk of Violence	4	Low	2013-10-22	2013-11-27	2013-12-02	1	41
857	travis holmes	travis	holmes	2014-02-25	Male	1987-12-07	28	25 - 45	African-American	8	8	0	1	16	-1	2014-02-24 04:17:37	2014-02-25 08:09:24	14002607CF10A	2014-02-24		1	(F2)	Aggravated Battery / Pregnant	1	15005982CF10A	(M1)	0	2015-05-07	Possess Cannabis/20 Grams Or Less	2015-05-07	2015-06-01		1	15008803CF10A	(F2)	2015-06-30	Aggravated Battery / Pregnant	Risk of Recidivism	8	High	2014-02-25	Risk of Violence	9	High	2014-02-25	2015-05-07	2015-06-01	16	0
858	shakennea baker	shakennea	baker	2013-11-06	Female	1985-12-07	30	25 - 45	African-American	0	3	0	0	0	0	2013-11-06 03:13:16	2013-11-07 09:03:30	13020963MM10A	2013-11-06		0	(M1)	Battery	0									0					Risk of Recidivism	3	Low	2013-11-06	Risk of Violence	3	Low	2013-11-06	2013-11-06	2013-11-07	0	1
859	rionne holloman	rionne	holloman	2013-04-24	Male	1993-01-28	23	Less than 25	African-American	0	5	0	0	1	0	2013-04-24 02:27:23	2013-04-24 08:08:08	13005889CF10A	2013-04-23		1	(F3)	Agg Fleeing and Eluding	0									0					Risk of Recidivism	5	Medium	2013-04-24	Risk of Violence	7	Medium	2013-04-24	2014-02-20	2014-03-28	1	0
859	rionne holloman	rionne	holloman	2013-04-24	Male	1993-01-28	23	Less than 25	African-American	0	5	0	0	1	0	2013-04-24 02:27:23	2013-04-24 08:08:08	13005889CF10A	2013-04-23		1	(F3)	Agg Fleeing and Eluding	0									0					Risk of Recidivism	5	Medium	2013-04-24	Risk of Violence	7	Medium	2013-04-24	2014-02-20	2014-03-28	1	338
860	santiago montoya	santiago	montoya	2014-04-07	Male	1995-03-15	21	Less than 25	Caucasian	0	3	0	0	0	-1	2014-04-06 10:49:34	2014-04-07 08:24:56	14004752CF10A	2014-04-06		1	(F2)	Burglary Unoccupied Dwelling	0									0					Risk of Recidivism	3	Low	2014-04-07	Risk of Violence	6	Medium	2014-04-07	2014-04-06	2014-04-07	0	0
861	jared wanger	jared	wanger	2014-01-23	Male	1990-05-22	25	25 - 45	Caucasian	0	4	0	0	2	-13	2014-01-10 03:47:24	2014-01-22 08:41:17	13010449CF10A		2014-01-10	13	(F3)	arrest case no charge	1	14010024CF10A	(F3)	1	2014-07-22	Grand Theft in the 3rd Degree	2014-07-23	2014-08-27		0					Risk of Recidivism	4	Low	2014-01-23	Risk of Violence	3	Low	2014-01-23	2015-06-19	2015-06-30	2	0
862	ivan karnell	ivan	karnell	2014-12-05	Male	1962-04-29	53	Greater than 45	Caucasian	0	1	0	0	2	-45	2014-10-21 11:34:03	2014-10-22 12:59:16	09002261MM20A	2009-06-09		2005	(M1)	Theft/To Deprive	0									0					Risk of Recidivism	1	Low	2014-12-05	Risk of Violence	1	Low	2014-12-05	2014-10-21	2014-10-22	2	0
863	christopher metcalf	christopher	metcalf	2013-09-15	Male	1976-03-12	40	25 - 45	Caucasian	0	4	0	0	5	0	2013-09-15 03:23:56	2013-09-15 07:27:18	13013025CF10A	2013-09-14		1	(F3)	Neglect Child / No Bodily Harm	0									0					Risk of Recidivism	4	Low	2013-09-15	Risk of Violence	1	Low	2013-09-15	2015-10-07	2015-10-16	5	0
863	christopher metcalf	christopher	metcalf	2013-09-15	Male	1976-03-12	40	25 - 45	Caucasian	0	4	0	0	5	0	2013-09-15 03:23:56	2013-09-15 07:27:18	13013025CF10A	2013-09-14		1	(F3)	Neglect Child / No Bodily Harm	0									0					Risk of Recidivism	4	Low	2013-09-15	Risk of Violence	1	Low	2013-09-15	2015-10-07	2015-10-16	5	761
864	frank carvalho	frank	carvalho	2013-04-25	Male	1991-05-25	24	Less than 25	Hispanic	0	8	0	0	8	0	2013-04-25 02:04:02	2013-04-25 01:19:35	13005907CF10A	2013-04-25		0	(F3)	Possession of Cannabis	0									0					Risk of Recidivism	8	High	2013-04-25	Risk of Violence	4	Low	2013-04-25	2013-04-25	2013-04-25	8	0
865	catie boyer	catie	boyer	2014-06-13	Female	1992-06-30	23	Less than 25	Caucasian	0	8	0	1	3	-65	2014-04-09 04:09:13	2014-05-14 10:23:00	14013950MU10A	2014-04-09		65	(M2)	Driving License Suspended	0									0					Risk of Recidivism	8	High	2014-06-13	Risk of Violence	4	Low	2014-06-13	2014-04-09	2014-05-14	3	0
867	timothy garner	timothy	garner	2013-12-22	Male	1988-12-27	27	25 - 45	African-American	0	4	0	0	5	0	2013-12-22 05:35:31	2014-02-24 08:43:57	13023566MM10A	2013-12-22		0	(M2)	Criminal Mischief Damage <$200	1	14073493TC40A	(M2)	114	2014-10-28	Operating W/O Valid License	2015-02-19	2015-03-10		0					Risk of Recidivism	4	Low	2013-12-22	Risk of Violence	9	High	2013-12-22	2013-12-22	2014-02-24	5	64
868	yvonne taylor	yvonne	taylor	2014-11-01	Female	1978-07-23	37	25 - 45	African-American	0	1	0	0	0	0	2014-11-01 01:16:37	2014-11-02 09:44:25	14014674CF10A	2014-10-31		1	(F3)	Aggravated Assault w/Firearm	0									0					Risk of Recidivism	1	Low	2014-11-01	Risk of Violence	1	Low	2014-11-01	2014-11-01	2014-11-02	0	1
869	mark rawiszer	mark	rawiszer	2013-09-07	Male	1971-09-03	44	25 - 45	Caucasian	0	3	0	0	11	0	2013-09-07 03:37:40	2014-03-06 10:26:26	13017051MM10A	2013-09-07		0	(M1)	Battery	0									0					Risk of Recidivism	3	Low	2013-09-07	Risk of Violence	6	Medium	2013-09-07	2013-09-07	2014-03-06	11	180
870	tanares russ	tanares	russ	2013-10-30	Female	1980-11-13	35	25 - 45	African-American	0	2	0	0	6	-1	2013-10-29 02:27:04	2013-10-30 08:32:44	13015117CF10A		2013-10-29	1	(F3)	arrest case no charge	1	15005910MM10A	(M1)	1	2015-05-29	Battery	2015-05-30	2015-07-17		1	15005910MM10A	(M1)	2015-05-29	Battery	Risk of Recidivism	2	Low	2013-10-30	Risk of Violence	1	Low	2013-10-30	2015-05-30	2015-07-17	6	0
871	attique mohammad	attique	mohammad	2013-02-06	Male	1973-12-25	42	25 - 45	Caucasian	0	1	0	0	0	0	2013-02-06 02:27:50	2013-02-06 07:49:59	13002721MM10A	2013-02-06		0	(M1)	Battery	0									0					Risk of Recidivism	1	Low	2013-02-06	Risk of Violence	1	Low	2013-02-06	2013-02-06	2013-02-06	0	0
872	anthony deary	anthony	deary	2014-01-24	Male	1978-03-17	38	25 - 45	African-American	0	7	0	0	15	0	2014-01-24 04:04:57	2014-01-24 09:37:14	14001075CF10A	2014-01-23		1	(F3)	Drivg While Lic Suspd/Revk/Can	1	16014195TC30A	(M2)		2016-03-04	Driving License Suspended				0					Risk of Recidivism	7	Medium	2014-01-24	Risk of Violence	5	Medium	2014-01-24	2014-01-24	2014-01-24	15	0
874	jorge fernandez	jorge	fernandez	2013-03-06	Male	1990-01-23	26	25 - 45	Hispanic	0	6	0	0	4	0	2013-03-06 12:02:54	2013-03-06 09:47:10	13003284CF10A	2013-03-05		1	(F3)	Possession of Cannabis	0									0					Risk of Recidivism	6	Medium	2013-03-06	Risk of Violence	6	Medium	2013-03-06	2013-03-06	2013-03-06	4	0
875	brittany funchess	brittany	funchess	2013-05-28	Female	1990-05-30	25	25 - 45	African-American	0	3	0	0	0	-1	2013-05-27 09:36:52	2013-05-28 09:04:37	13010161MM10A	2013-05-27		1	(M1)	Resist/Obstruct W/O Violence	0									0					Risk of Recidivism	3	Low	2013-05-28	Risk of Violence	3	Low	2013-05-28	2013-05-27	2013-05-28	0	0
876	glenn watson	glenn	watson	2014-09-29	Male	1981-05-19	34	25 - 45	Caucasian	0	1	0	0	0	-1	2014-09-28 11:18:18	2014-09-29 01:21:56	14014310MM10A	2014-09-28		1	(M1)	Battery	0									0					Risk of Recidivism	1	Low	2014-09-29	Risk of Violence	1	Low	2014-09-29	2014-09-28	2014-09-29	0	0
877	diante williams	diante	williams	2013-12-11	Male	1993-12-26	22	Less than 25	African-American	1	7	0	0	2	-1	2013-12-10 03:14:45	2013-12-11 09:07:02	13017150CF10A	2013-12-10		1	(F3)	Grand Theft Dwell Property	0									0					Risk of Recidivism	7	Medium	2013-12-11	Risk of Violence	8	High	2013-12-11	2014-01-31	2014-02-08	2	0
877	diante williams	diante	williams	2013-12-11	Male	1993-12-26	22	Less than 25	African-American	1	7	0	0	2	-1	2013-12-10 03:14:45	2013-12-11 09:07:02	13017150CF10A	2013-12-10		1	(F3)	Grand Theft Dwell Property	0									0					Risk of Recidivism	7	Medium	2013-12-11	Risk of Violence	8	High	2013-12-11	2014-08-08	2014-08-21	2	59
877	diante williams	diante	williams	2013-12-11	Male	1993-12-26	22	Less than 25	African-American	1	7	0	0	2	-1	2013-12-10 03:14:45	2013-12-11 09:07:02	13017150CF10A	2013-12-10		1	(F3)	Grand Theft Dwell Property	0									0					Risk of Recidivism	7	Medium	2013-12-11	Risk of Violence	8	High	2013-12-11	2014-08-21	2016-04-09	2	850
879	alfonso starling	alfonso	starling	2013-05-17	Male	1992-01-19	24	Less than 25	Caucasian	0	4	0	0	1				12011759CF10A		2012-08-10	280	(F2)	arrest case no charge	0									0					Risk of Recidivism	4	Low	2013-05-17	Risk of Violence	6	Medium	2013-05-17			1	0
880	victor lozada	victor	lozada	2013-08-13	Male	1951-05-12	64	Greater than 45	Hispanic	0	1	0	0	1	-8	2013-08-05 12:41:27	2013-08-13 02:27:19	13010831CF10A	2013-08-04		9	(F3)	Aggravated Assault	0									0					Risk of Recidivism	1	Low	2013-08-13	Risk of Violence	1	Low	2013-08-13	2013-08-05	2013-08-13	1	0
881	lawrence derubeis	lawrence	derubeis	2014-01-21	Female	1966-05-22	49	Greater than 45	Caucasian	0	1	0	0	2	0	2014-01-21 03:14:16	2014-01-21 07:59:17	14002500MU10A	2014-01-21		0	(M1)	Driving Under The Influence	1	14027296TC10A	(M2)	0	2014-07-25	Driving License Suspended	2014-07-25	2014-07-26		0					Risk of Recidivism	1	Low	2014-01-21	Risk of Violence	1	Low	2014-01-21	2014-06-08	2014-06-09	2	0
881	lawrence derubeis	lawrence	derubeis	2014-01-21	Female	1966-05-22	49	Greater than 45	Caucasian	0	1	0	0	2	0	2014-01-21 03:14:16	2014-01-21 07:59:17	14002500MU10A	2014-01-21		0	(M1)	Driving Under The Influence	1	14027296TC10A	(M2)	0	2014-07-25	Driving License Suspended	2014-07-25	2014-07-26		0					Risk of Recidivism	1	Low	2014-01-21	Risk of Violence	1	Low	2014-01-21	2014-07-25	2014-07-26	2	139
882	david hall	david	hall	2014-12-15	Male	1965-07-14	50	Greater than 45	Caucasian	0	1	0	0	5	-1	2014-12-14 04:50:01	2014-12-15 06:38:00	15002028CF10A	2014-12-14		1	(F3)	Driving While License Revoked	1	14016894CF10A	(M2)	0	2014-12-21	Unlaw LicTag/Sticker Attach	2014-12-21	2015-01-16		0					Risk of Recidivism	1	Low	2014-12-15	Risk of Violence	1	Low	2014-12-15	2014-12-21	2015-01-16	5	0
883	ryan bergeron	ryan	bergeron	2014-04-01	Male	1988-04-07	28	25 - 45	Caucasian	0	6	0	0	8	162	2014-09-10 05:48:28	2014-10-11 05:18:30	13014781CF10A		2013-10-22	161	(F2)	arrest case no charge	1	15011994CF10A	(F3)		2015-09-15	Possession of Cocaine				0					Risk of Recidivism	6	Medium	2014-04-01	Risk of Violence	8	High	2014-04-01	2014-09-10	2014-10-11	8	0
883	ryan bergeron	ryan	bergeron	2014-04-01	Male	1988-04-07	28	25 - 45	Caucasian	0	6	0	0	8	162	2014-09-10 05:48:28	2014-10-11 05:18:30	13014781CF10A		2013-10-22	161	(F2)	arrest case no charge	1	15011994CF10A	(F3)		2015-09-15	Possession of Cocaine				0					Risk of Recidivism	6	Medium	2014-04-01	Risk of Violence	8	High	2014-04-01	2014-09-10	2014-10-11	8	193
884	benny evans	benny	evans	2013-08-14	Male	1949-12-19	66	Greater than 45	Caucasian	0	1	0	0	0	0	2013-08-14 05:00:03	2013-08-15 04:51:13	13015395MM10A	2013-08-14		0	(M1)	Battery	1	15045735TC40A	(M2)		2015-08-01	Driving License Suspended				0					Risk of Recidivism	1	Low	2013-08-14	Risk of Violence	1	Low	2013-08-14	2013-08-14	2013-08-15	0	1
886	adriana valencia	adriana	valencia	2013-08-21	Female	1969-08-29	46	Greater than 45	Caucasian	0	1	0	0	0	-1	2013-08-20 09:12:14	2013-08-21 09:19:20	13015855MM10A	2013-08-20		1	(M1)	Battery	0									0					Risk of Recidivism	1	Low	2013-08-21	Risk of Violence	1	Low	2013-08-21	2013-08-20	2013-08-21	0	0
887	courtney louis	courtney	louis	2013-03-04	Male	1985-05-11	30	25 - 45	African-American	0	6	0	1	5	-1	2013-03-03 06:23:59	2013-03-04 08:33:50	13003196CF10A	2013-03-03		1	(F3)	Driving While License Revoked	1	13011913CF10A	(F3)	0	2013-08-23	Unauth C/P/S Sounds>1000/Audio	2013-08-23	2013-08-24		1	14009967MM10A	(M1)	2014-06-26	Battery	Risk of Recidivism	6	Medium	2013-03-04	Risk of Violence	6	Medium	2013-03-04	2013-08-23	2013-08-24	5	0
888	pamela delgado	pamela	delgado	2014-01-22	Female	1993-11-01	22	Less than 25	Caucasian	0	3	0	0	0	0	2014-01-22 12:55:30	2014-01-22 09:20:36	14001125MM10A	2014-01-21		1	(M1)	Battery	0									0					Risk of Recidivism	3	Low	2014-01-22	Risk of Violence	4	Low	2014-01-22	2014-01-22	2014-01-22	0	0
889	clevor kiffin	clevor	kiffin	2013-03-24	Male	1993-04-06	23	Less than 25	Caucasian	0	4	0	0	1	-1	2013-03-23 10:06:43	2013-04-02 09:22:16	13013358TC10A		2013-03-23	1	(M2)	arrest case no charge	0									0					Risk of Recidivism	4	Low	2013-03-24	Risk of Violence	6	Medium	2013-03-24	2016-02-06	2016-02-07	1	9
889	clevor kiffin	clevor	kiffin	2013-03-24	Male	1993-04-06	23	Less than 25	Caucasian	0	4	0	0	1	-1	2013-03-23 10:06:43	2013-04-02 09:22:16	13013358TC10A		2013-03-23	1	(M2)	arrest case no charge	0									0					Risk of Recidivism	4	Low	2013-03-24	Risk of Violence	6	Medium	2013-03-24	2016-02-06	2016-02-07	1	1050
890	donovan newbold	donovan	newbold	2013-12-07	Male	1985-11-26	30	25 - 45	Other	0	6	0	0	0	-1	2013-12-06 07:17:34	2013-12-07 07:42:09	13022646MM10A	2013-12-06		1	(M1)	Battery	1	14039702TC40A	(M2)		2014-06-07	Operating W/O Valid License				0					Risk of Recidivism	6	Medium	2013-12-07	Risk of Violence	5	Medium	2013-12-07	2015-10-05	2015-10-16	0	0
891	rashad adams	rashad	adams	2014-11-28	Male	1991-06-21	24	Less than 25	African-American	1	10	0	0	10	75	2015-02-11 07:10:51	2015-02-28 12:17:14	14015066CF10A		2014-11-28	0	(F2)	arrest case no charge	1	15001970CF10A	(F3)	0	2015-02-11	Poss Pyrrolidinovalerophenone	2015-02-11	2015-02-28		0					Risk of Recidivism	10	High	2014-11-28	Risk of Violence	5	Medium	2014-11-28	2015-02-11	2015-02-28	10	0
892	john lindsey	john	lindsey	2014-01-10	Male	1963-03-17	53	Greater than 45	Caucasian	0	7	0	0	0	-1	2014-01-09 04:27:16	2015-02-28 05:48:40	14000382CF10A	2014-01-09		1	(F3)	Possession Burglary Tools	0									0					Risk of Recidivism	7	Medium	2014-01-10	Risk of Violence	5	Medium	2014-01-10	2014-01-09	2015-02-28	0	414
893	donnie aguilar	donnie	aguilar	2013-02-25	Male	1985-01-19	31	25 - 45	Hispanic	0	1	0	0	0	-1	2013-02-24 12:26:26	2013-02-25 01:51:33	13003813MM10A	2013-02-23		2	(M2)	DUI Property Damage/Injury	0									0					Risk of Recidivism	1	Low	2013-02-25	Risk of Violence	2	Low	2013-02-25	2013-02-24	2013-02-25	0	0
894	robson thuller	robson	thuller	2014-09-25	Male	1959-11-14	56	Greater than 45	Caucasian	0	1	0	0	3				14034608MU10A	2014-09-24		1	(M1)	DUI Level 0.15 Or Minor In Veh	0									0					Risk of Recidivism	1	Low	2014-09-25	Risk of Violence	1	Low	2014-09-25			3	0
895	patrick cezaire	patrick	cezaire	2013-05-01	Male	1985-03-15	31	25 - 45	Other	0	2	0	0	1	-1	2013-04-30 07:18:35	2013-05-01 03:47:37	13006119CF10A		2013-04-30	1	(F3)	arrest case no charge	0									0					Risk of Recidivism	2	Low	2013-05-01	Risk of Violence	2	Low	2013-05-01	2014-12-30	2014-12-31	1	0
895	patrick cezaire	patrick	cezaire	2013-05-01	Male	1985-03-15	31	25 - 45	Other	0	2	0	0	1	-1	2013-04-30 07:18:35	2013-05-01 03:47:37	13006119CF10A		2013-04-30	1	(F3)	arrest case no charge	0									0					Risk of Recidivism	2	Low	2013-05-01	Risk of Violence	2	Low	2013-05-01	2014-12-30	2014-12-31	1	609
896	jessica pydykowski	jessica	pydykowski	2014-10-18	Female	1984-11-03	31	25 - 45	Caucasian	0	7	0	0	0	-2	2014-10-16 04:19:33	2014-10-21 03:30:28	14013985CF10A	2014-10-16		2	(F3)	Grand Theft in the 3rd Degree	0									0					Risk of Recidivism	7	Medium	2014-10-18	Risk of Violence	3	Low	2014-10-18	2014-10-16	2014-10-21	0	3
897	sequan turner	sequan	turner	2013-02-26	Male	1995-01-13	21	Less than 25	African-American	4	7	0	0	4	622	2014-11-10 05:41:58	2015-03-08 04:08:32	12017851CF10A		2012-12-20	68	(F3)	arrest case no charge	1	14016144MM10A	(M2)	0	2014-11-10	Petit Theft	2014-11-10	2015-03-08		0					Risk of Recidivism	7	Medium	2013-02-26	Risk of Violence	8	High	2013-02-26	2014-11-10	2015-03-08	4	0
898	antvonte sanders	antvonte	sanders	2013-03-07	Male	1988-02-25	28	25 - 45	African-American	0	8	0	0	4	747	2015-03-24 07:19:51	2015-05-15 10:51:34	12002361CF10A		2012-03-06	366	(F2)	arrest case no charge	1	15003939CF10A	(F3)	0	2015-03-24	Tampering With Physical Evidence	2015-03-24	2015-05-15		0					Risk of Recidivism	8	High	2013-03-07	Risk of Violence	7	Medium	2013-03-07	2015-03-24	2015-05-15	4	0
899	stephen parra	stephen	parra	2013-03-17	Male	1991-04-08	25	25 - 45	African-American	0	3	0	0	0	-1	2013-03-16 09:16:46	2013-03-17 02:17:18	13005181MM10A	2013-03-16		1	(M2)	Disorderly Conduct	1	15011037CF10A	(F3)	0	2015-08-26	False Imprisonment	2015-08-26	2015-08-29		1	15011037CF10A	(M1)	2015-08-26	Battery	Risk of Recidivism	3	Low	2013-03-17	Risk of Violence	4	Low	2013-03-17	2015-08-26	2015-08-29	0	0
900	aaliyah lovo	aaliyah	lovo	2013-11-04	Female	1994-11-10	21	Less than 25	Caucasian	0	7	0	0	0	-1	2013-11-03 01:54:43	2013-11-05 05:54:27	13015312CF10A	2013-11-03		1	(F2)	Burglary Unoccupied Dwelling	0									0					Risk of Recidivism	7	Medium	2013-11-04	Risk of Violence	5	Medium	2013-11-04	2013-11-03	2013-11-05	0	1
901	odean lawrence	odean	lawrence	2013-01-13	Male	1988-07-18	27	25 - 45	African-American	0	2	0	0	0	-1	2013-01-12 04:24:36	2013-01-13 12:41:13	13000749MM10A	2013-01-12		1	(M1)	Battery	0									0					Risk of Recidivism	2	Low	2013-01-13	Risk of Violence	3	Low	2013-01-13	2013-01-12	2013-01-13	0	0
902	michael rohrs	michael	rohrs	2013-04-11	Male	1968-02-06	48	Greater than 45	Caucasian	0	-1	0	0	3	-1	2013-04-10 05:39:46	2013-04-12 09:08:49	13005170CF10A	2013-04-10		1	(F3)	Possession of Cocaine	1	14003620CF10A	(F1)	0	2014-03-14	Traffick Methampheta 28g><200g	2014-03-14	2014-04-21		0					Risk of Recidivism	-1	N/A	2013-04-11	Risk of Violence	3	Low	2013-04-11	2014-03-14	2014-04-21	3	1
904	jean rodriguez	jean	rodriguez	2014-05-24	Male	1995-12-13	20	Less than 25	Hispanic	0	2	0	0	0	-1	2014-05-23 07:42:01	2014-05-24 08:43:14	14008346MM10A	2014-05-23		1	(M1)	Possess Cannabis/20 Grams Or Less	1	14017412MM10A	(M2)	0	2014-12-10	Petit Theft	2014-12-10	2014-12-11		0					Risk of Recidivism	2	Low	2014-05-24	Risk of Violence	5	Medium	2014-05-24	2014-12-10	2014-12-11	0	0
905	luis mora	luis	mora	2013-07-23	Male	1983-05-16	32	25 - 45	Hispanic	0	1	0	0	1	-27	2013-06-26 07:47:32	2013-06-26 08:09:02	13008994CF10A	2013-06-26		27	(F3)	Possession of Cocaine	0									0					Risk of Recidivism	1	Low	2013-07-23	Risk of Violence	1	Low	2013-07-23	2013-06-26	2013-06-26	1	0
906	megan mcnulty	megan	mcnulty	2013-09-22	Female	1991-07-28	24	Less than 25	Caucasian	0	5	0	1	0	0	2013-09-22 05:21:34	2013-09-23 02:00:15	13013345CF10A	2013-09-22		0	(F2)	Burglary Unoccupied Dwelling	0									0					Risk of Recidivism	5	Medium	2013-09-22	Risk of Violence	5	Medium	2013-09-22	2013-09-22	2013-09-23	0	1
907	kwamayne davis	kwamayne	davis	2014-06-06	Male	1993-10-03	22	Less than 25	African-American	0	7	0	0	1	-1	2014-06-05 03:23:07	2014-08-22 11:16:35	14007777CF10A	2014-06-05		1	(F3)	Possession Burglary Tools	0									0					Risk of Recidivism	7	Medium	2014-06-06	Risk of Violence	6	Medium	2014-06-06	2014-06-05	2014-08-22	1	77
908	amanda anglero	amanda	anglero	2014-10-15	Female	1991-11-13	24	Less than 25	Caucasian	0	2	0	0	0	-1	2014-10-14 12:51:58	2014-10-15 01:48:46	14015033MM10A	2014-10-14		1	(M1)	Battery	0									0					Risk of Recidivism	2	Low	2014-10-15	Risk of Violence	3	Low	2014-10-15	2014-10-14	2014-10-15	0	0
909	mellick jackson	mellick	jackson	2014-01-29	Male	1996-04-11	20	Less than 25	African-American	1	3	0	0	1	-1	2014-01-28 12:49:23	2014-01-29 10:42:36	14000687CF10A		2014-01-28	1	(F7)	arrest case no charge	0									0					Risk of Recidivism	3	Low	2014-01-29	Risk of Violence	6	Medium	2014-01-29	2014-01-28	2014-01-29	1	0
910	kyle foster	kyle	foster	2014-07-24	Male	1989-08-03	26	25 - 45	African-American	0	4	0	0	1	-56	2014-05-29 05:26:07	2014-07-23 08:52:10	14007458CF10A	2014-05-29		56	(F3)	Agg Fleeing and Eluding	0									0					Risk of Recidivism	4	Low	2014-07-24	Risk of Violence	4	Low	2014-07-24	2014-05-29	2014-07-23	1	0
911	maria velasquez	maria	velasquez	2014-09-08	Female	1967-09-30	48	Greater than 45	Hispanic	0	1	0	0	0	0	2014-09-08 01:12:38	2014-09-08 01:13:23	14032232MU10A	2014-09-07		1	(M1)	DUI Level 0.15 Or Minor In Veh	0									0					Risk of Recidivism	1	Low	2014-09-08	Risk of Violence	1	Low	2014-09-08	2014-09-08	2014-09-08	0	0
912	nykky chanthavong	nykky	chanthavong	2014-08-26	Male	1990-03-22	26	25 - 45	Asian	0	1	0	0	0	-1	2014-08-25 06:09:17	2014-08-25 07:06:29	14030971MU10A	2014-08-25		1	(M1)	Driving Under The Influence	0									0					Risk of Recidivism	1	Low	2014-08-26	Risk of Violence	2	Low	2014-08-26	2014-08-25	2014-08-25	0	0
913	bertram cooper	bertram	cooper	2013-07-12	Male	1985-01-13	31	25 - 45	African-American	0	8	0	0	3	-20	2013-06-22 07:50:45	2013-07-12 05:35:03	13011983MM10A	2013-06-22		20	(M1)	Viol Pretrial Release Dom Viol	1	15004547MM10A	(M1)	0	2015-04-16	Resist/Obstruct W/O Violence	2015-04-16	2015-04-17		0					Risk of Recidivism	8	High	2013-07-12	Risk of Violence	3	Low	2013-07-12	2015-04-16	2015-04-17	3	0
914	dwayne donaldson	dwayne	donaldson	2014-12-02	Male	1988-08-02	27	25 - 45	African-American	0	7	0	0	3	-1	2014-12-01 03:21:53	2014-12-07 04:35:04	14016999MM10A	2014-12-01		1	(M1)	Battery	1	15007366CF10A	(F3)	0	2015-06-06	Aggravated Assault w/Firearm	2015-06-06	2015-06-07		1	15007366CF10A	(F3)	2015-06-06	Aggravated Assault w/Firearm	Risk of Recidivism	7	Medium	2014-12-02	Risk of Violence	8	High	2014-12-02	2015-06-06	2015-06-07	3	5
915	ricardo daley	ricardo	daley	2013-10-08	Male	1956-11-12	59	Greater than 45	African-American	0	5	0	0	17	-65	2013-08-04 05:51:30	2013-10-01 10:35:06	13010841CF10A	2013-08-04		65	(F3)	Grand Theft in the 3rd Degree	1	14001373MM20A	(M1)	72	2014-03-16	Possess Drug Paraphernalia	2014-05-27	2014-06-24		0					Risk of Recidivism	5	Medium	2013-10-08	Risk of Violence	2	Low	2013-10-08	2014-05-27	2014-06-24	17	0
916	johhnie scott	johhnie	scott	2013-01-18	Male	1975-06-13	40	25 - 45	African-American	0	2	0	0	0	-1	2013-01-17 05:59:00	2013-01-18 08:48:30	13000829CF10A	2013-01-17		1	(F3)	Aggravated Assault w/Firearm	0									0					Risk of Recidivism	2	Low	2013-01-18	Risk of Violence	1	Low	2013-01-18	2013-01-17	2013-01-18	0	0
917	marcus gibbons	marcus	gibbons	2014-12-10	Male	1993-08-17	22	Less than 25	African-American	0	10	0	0	11	0	2014-12-10 01:21:36	2014-12-10 01:26:52	14016372CF10A	2014-12-09		1	(F3)	Possession of Cocaine	1	15001136CF10A	(F3)	0	2015-01-25	Poss Pyrrolidinovalerophenone	2015-01-25	2015-02-28		1	16001348MM10A	(M1)	2016-02-10	Battery	Risk of Recidivism	10	High	2014-12-10	Risk of Violence	8	High	2014-12-10	2015-01-09	2015-01-10	11	0
917	marcus gibbons	marcus	gibbons	2014-12-10	Male	1993-08-17	22	Less than 25	African-American	0	10	0	0	11	0	2014-12-10 01:21:36	2014-12-10 01:26:52	14016372CF10A	2014-12-09		1	(F3)	Possession of Cocaine	1	15001136CF10A	(F3)	0	2015-01-25	Poss Pyrrolidinovalerophenone	2015-01-25	2015-02-28		1	16001348MM10A	(M1)	2016-02-10	Battery	Risk of Recidivism	10	High	2014-12-10	Risk of Violence	8	High	2014-12-10	2015-01-25	2015-02-28	11	31
918	vernee mckenzie	vernee	mckenzie	2013-04-16	Female	1977-09-25	38	25 - 45	African-American	0	1	0	0	1	-1	2013-04-15 11:18:52	2013-04-16 09:12:28	13005448CF10A	2013-04-15		1	(F2)	Robbery / No Weapon	0									0					Risk of Recidivism	1	Low	2013-04-16	Risk of Violence	1	Low	2013-04-16	2013-04-15	2013-04-16	1	0
919	jeffrey malletgonzales	jeffrey	malletgonzales	2014-12-11	Male	1979-11-12	36	25 - 45	Hispanic	0	10	0	0	1	-8	2014-12-03 12:46:36	2015-01-12 09:14:40	14013084MM10A	2014-09-01		101	(M1)	Petit Theft $100- $300	1	15013906CF10A	(F3)	0	2015-10-25	Grand Theft in the 3rd Degree	2015-10-25	2015-12-23		0					Risk of Recidivism	10	High	2014-12-11	Risk of Violence	9	High	2014-12-11	2015-10-25	2015-12-23	1	32
920	neville gordon	neville	gordon	2014-05-09	Male	1965-08-26	50	Greater than 45	Other	0	1	0	0	4	-1	2014-05-08 02:02:52	2014-05-09 02:04:12	14007637MM10A	2014-05-08		1	(M1)	Battery	0									0					Risk of Recidivism	1	Low	2014-05-09	Risk of Violence	1	Low	2014-05-09	2014-05-08	2014-05-09	4	0
921	steve mitchell	steve	mitchell	2013-03-04	Male	1985-11-11	30	25 - 45	African-American	0	7	0	0	1	0	2013-03-04 03:53:19	2013-03-05 01:59:42	13004414MM10A	2013-03-04		0	(M1)	Possess Cannabis/20 Grams Or Less	0									0					Risk of Recidivism	7	Medium	2013-03-04	Risk of Violence	4	Low	2013-03-04	2013-04-29	2013-05-09	1	1
921	steve mitchell	steve	mitchell	2013-03-04	Male	1985-11-11	30	25 - 45	African-American	0	7	0	0	1	0	2013-03-04 03:53:19	2013-03-05 01:59:42	13004414MM10A	2013-03-04		0	(M1)	Possess Cannabis/20 Grams Or Less	0									0					Risk of Recidivism	7	Medium	2013-03-04	Risk of Violence	4	Low	2013-03-04	2013-04-29	2013-05-09	1	66
922	robert golden	robert	golden	2014-05-15	Male	1988-08-12	27	25 - 45	Caucasian	0	6	0	0	6	-1	2014-05-14 02:14:46	2014-06-17 10:56:58	14006740CF10A		2014-05-14	1	(F3)	arrest case no charge	1	16000579CF10A	(F2)		2016-01-10	Threaten Throw Destruct Device				1	16000579CF10A	(F2)	2016-01-10	Threaten Throw Destruct Device	Risk of Recidivism	6	Medium	2014-05-15	Risk of Violence	4	Low	2014-05-15	2015-07-13	2015-07-14	6	33
922	robert golden	robert	golden	2014-05-15	Male	1988-08-12	27	25 - 45	Caucasian	0	6	0	0	6	-1	2014-05-14 02:14:46	2014-06-17 10:56:58	14006740CF10A		2014-05-14	1	(F3)	arrest case no charge	1	16000579CF10A	(F2)		2016-01-10	Threaten Throw Destruct Device				1	16000579CF10A	(F2)	2016-01-10	Threaten Throw Destruct Device	Risk of Recidivism	6	Medium	2014-05-15	Risk of Violence	4	Low	2014-05-15	2015-07-13	2015-07-14	6	425
923	edmond shield	edmond	shield	2013-11-06	Male	1972-09-04	43	25 - 45	African-American	0	1	0	0	1				13020969MM10A	2013-11-06		0	(M1)	Battery	0									0					Risk of Recidivism	1	Low	2013-11-06	Risk of Violence	1	Low	2013-11-06			1	0
924	cindy lambke	cindy	lambke	2013-10-09	Female	1956-05-13	59	Greater than 45	Caucasian	0	1	0	0	0	0	2013-10-09 03:00:19	2013-10-09 08:12:28	13019210MM10A	2013-10-08		1	(M2)	Driving Under The Influence	0									0					Risk of Recidivism	1	Low	2013-10-09	Risk of Violence	1	Low	2013-10-09	2013-10-09	2013-10-09	0	0
925	kevin parker	kevin	parker	2013-04-18	Male	1979-01-24	37	25 - 45	Caucasian	0	1	0	0	2	-2	2013-04-16 05:14:39	2013-04-17 05:35:24	13007381MM10A	2013-04-16		2	(M1)	DUI Level 0.15 Or Minor In Veh	0									0					Risk of Recidivism	1	Low	2013-04-18	Risk of Violence	1	Low	2013-04-18	2013-04-16	2013-04-17	2	0
926	antoine williams	antoine	williams	2014-08-25	Male	1988-04-13	28	25 - 45	African-American	0	7	0	0	5	0	2014-08-25 02:53:15	2014-08-26 05:00:56	14011579CF10A	2014-08-25		0	(M1)	Felony Battery (Dom Strang)	1	14081815TC30A	(M2)		2014-09-27	Driving License Suspended				0					Risk of Recidivism	7	Medium	2014-08-25	Risk of Violence	7	Medium	2014-08-25	2014-08-25	2014-08-26	5	1
927	remo bosi-godomar	remo	bosi-godomar	2013-09-06	Male	1977-11-06	38	25 - 45	Caucasian	0	1	0	0	0	0	2013-09-06 01:28:27	2013-09-06 10:50:40	13012553CF10A	2013-09-06		0	(F3)	Possession of Cocaine	0									0					Risk of Recidivism	1	Low	2013-09-06	Risk of Violence	1	Low	2013-09-06	2013-09-06	2013-09-06	0	0
928	michelle traslavina	michelle	traslavina	2014-11-27	Female	1982-10-12	33	25 - 45	Caucasian	0	1	0	0	0	0	2014-11-27 12:33:26	2014-11-27 07:48:10	14043174MU10A	2014-11-26		1	(M1)	DUI Property Damage/Injury	0									0					Risk of Recidivism	1	Low	2014-11-27	Risk of Violence	1	Low	2014-11-27	2014-11-27	2014-11-27	0	0
929	luis navas	luis	navas	2014-09-17	Male	1991-10-28	24	Less than 25	Caucasian	0	4	0	1	2	-1	2014-09-16 04:06:42	2014-09-17 08:16:07	14012550CF10A	2014-09-16		1	(F3)	Grand Theft (Motor Vehicle)	0									0					Risk of Recidivism	4	Low	2014-09-17	Risk of Violence	5	Medium	2014-09-17	2014-09-16	2014-09-17	2	0
930	jeremiah durandisse	jeremiah	durandisse	2014-07-26	Male	1994-04-11	22	Less than 25	African-American	0	8	0	1	0	-1	2014-07-25 12:06:14	2014-07-26 08:38:15	14010162CF10A	2014-07-25		1	(F3)	Att Burgl Unoccupied Dwel	1	15001242MM40A	(M1)	139	2015-03-05	Resist/Obstruct W/O Violence	2015-07-22	2015-07-29		0					Risk of Recidivism	8	High	2014-07-26	Risk of Violence	6	Medium	2014-07-26	2016-01-27	2016-03-08	0	0
931	edwin martinez	edwin	martinez	2014-04-10	Male	1956-02-09	60	Greater than 45	Hispanic	0	4	0	0	0	-7	2014-04-03 09:55:18	2014-04-08 09:16:29	14004680CF10A	2014-04-03		7	(F3)	Possession of Cocaine	0									0					Risk of Recidivism	4	Low	2014-04-10	Risk of Violence	1	Low	2014-04-10	2014-04-03	2014-04-08	0	0
932	trinidad ramirez-ramirez	trinidad	ramirez-ramirez	2013-09-16	Male	1972-11-06	43	25 - 45	Hispanic	0	1	0	0	1	-44	2013-08-03 01:01:38	2013-09-13 05:55:40	13014658MM10A	2013-08-03		44	(M2)	Operating W/O Valid License	0									0					Risk of Recidivism	1	Low	2013-09-16	Risk of Violence	1	Low	2013-09-16	2013-08-03	2013-09-13	1	0
933	ares fernandez	ares	fernandez	2014-03-25	Male	1988-03-29	28	25 - 45	Caucasian	0	9	0	0	1	-1	2014-03-24 04:19:45	2014-04-02 08:59:00	14002981CF10A		2014-03-24	1	(F3)	arrest case no charge	0									0					Risk of Recidivism	9	High	2014-03-25	Risk of Violence	3	Low	2014-03-25	2014-06-18	2014-07-28	1	8
933	ares fernandez	ares	fernandez	2014-03-25	Male	1988-03-29	28	25 - 45	Caucasian	0	9	0	0	1	-1	2014-03-24 04:19:45	2014-04-02 08:59:00	14002981CF10A		2014-03-24	1	(F3)	arrest case no charge	0									0					Risk of Recidivism	9	High	2014-03-25	Risk of Violence	3	Low	2014-03-25	2014-09-17	2015-01-22	1	125
933	ares fernandez	ares	fernandez	2014-03-25	Male	1988-03-29	28	25 - 45	Caucasian	0	9	0	0	1	-1	2014-03-24 04:19:45	2014-04-02 08:59:00	14002981CF10A		2014-03-24	1	(F3)	arrest case no charge	0									0					Risk of Recidivism	9	High	2014-03-25	Risk of Violence	3	Low	2014-03-25	2014-09-17	2015-01-22	1	303
934	jerald peterson	jerald	peterson	2013-04-09	Male	1990-04-20	25	25 - 45	African-American	0	5	0	0	4	-1	2013-04-08 05:49:48	2013-05-10 05:42:55	13005037CF10A	2013-04-08		1	(F3)	Grand Theft Firearm	1	13008240CF10A	(M1)	1	2013-06-11	Possess Cannabis/20 Grams Or Less	2013-06-12	2013-09-11		1	13013057CF10A	(F1)	2013-09-15	Attempt Murder in the First Degree	Risk of Recidivism	5	Medium	2013-04-09	Risk of Violence	4	Low	2013-04-09	2013-04-08	2013-05-10	4	31
935	carmelo aquino	carmelo	aquino	2013-12-01	Male	1964-05-31	51	Greater than 45	Caucasian	0	1	0	0	0	0	2013-12-01 12:17:36	2013-12-01 12:33:39	13022352MM10A	2013-11-30		1	(M1)	DUI Level 0.15 Or Minor In Veh	0									0					Risk of Recidivism	1	Low	2013-12-01	Risk of Violence	1	Low	2013-12-01	2013-12-01	2013-12-01	0	0
936	christopher manderville	christopher	manderville	2014-07-02	Male	1983-04-08	33	25 - 45	Caucasian	0	1	0	0	0	-1	2014-07-01 09:18:40	2014-07-02 01:40:24	14009019CF10A	2014-07-01		1	(F3)	Battery on Law Enforc Officer	0									0					Risk of Recidivism	1	Low	2014-07-02	Risk of Violence	1	Low	2014-07-02	2015-06-18	2015-08-31	0	0
936	christopher manderville	christopher	manderville	2014-07-02	Male	1983-04-08	33	25 - 45	Caucasian	0	1	0	0	0	-1	2014-07-01 09:18:40	2014-07-02 01:40:24	14009019CF10A	2014-07-01		1	(F3)	Battery on Law Enforc Officer	0									0					Risk of Recidivism	1	Low	2014-07-02	Risk of Violence	1	Low	2014-07-02	2015-06-18	2015-08-31	0	425
937	johell ullda	johell	ullda	2013-12-25	Male	1986-02-28	30	25 - 45	Hispanic	0	5	0	0	6				13017755CF10A	2013-12-24		1	(F3)	Possession of Cocaine	1	14009698CF10A	(F3)		2014-07-15	Fleeing Or Attmp Eluding A Leo				1	14009698CF10A	(F2)	2014-07-15	Agg Assault Law Enforc Officer	Risk of Recidivism	5	Medium	2013-12-25	Risk of Violence	3	Low	2013-12-25	2014-12-16	2020-01-01	6	0
938	colleen barry	colleen	barry	2014-07-20	Female	1957-07-16	58	Greater than 45	Caucasian	0	1	0	0	0	0	2014-07-20 01:21:27	2014-07-20 09:41:00	14026259MU10A	2014-07-19		1	(M1)	Driving Under The Influence	0									0					Risk of Recidivism	1	Low	2014-07-20	Risk of Violence	1	Low	2014-07-20	2014-07-20	2014-07-20	0	0
939	denfield thomas	denfield	thomas	2014-11-28	Male	1952-06-20	63	Greater than 45	African-American	0	1	0	0	2	-1	2014-11-27 09:04:17	2014-12-09 09:50:39	14016855MM10A	2014-11-27		1	(M1)	Battery	0									0					Risk of Recidivism	1	Low	2014-11-28	Risk of Violence	1	Low	2014-11-28	2014-11-27	2014-12-09	2	11
940	danielle kaarlsen	danielle	kaarlsen	2014-11-24	Female	1987-08-05	28	25 - 45	Caucasian	0	4	0	0	0	-1	2014-11-23 05:42:40	2014-11-24 02:12:18	14016701MM10A	2014-11-23		1	(M1)	Battery	0									0					Risk of Recidivism	4	Low	2014-11-24	Risk of Violence	5	Medium	2014-11-24	2014-11-23	2014-11-24	0	0
942	nicole noakes	nicole	noakes	2014-04-13	Female	1987-09-03	28	25 - 45	Caucasian	0	3	0	0	0	-1	2014-04-12 02:58:42	2014-04-21 07:01:46	14006242MM10A	2014-04-11		2	(M1)	Battery	0									0					Risk of Recidivism	3	Low	2014-04-13	Risk of Violence	3	Low	2014-04-13	2014-04-12	2014-04-21	0	8
943	jarrod indik	jarrod	indik	2013-10-23	Male	1987-02-04	29	25 - 45	Caucasian	0	2	0	0	2	29	2013-11-21 04:46:06	2013-12-16 12:07:03	13012077CF10A	2013-08-27		57	(M1)	Felony Battery (Dom Strang)	1	14013034MM10A	(M1)	0	2014-08-31	Trespass/Property/Other Structure	2014-08-31	2014-09-16		0					Risk of Recidivism	2	Low	2013-10-23	Risk of Violence	2	Low	2013-10-23	2013-11-21	2013-12-16	2	0
943	jarrod indik	jarrod	indik	2013-10-23	Male	1987-02-04	29	25 - 45	Caucasian	0	2	0	0	2	29	2013-11-21 04:46:06	2013-12-16 12:07:03	13012077CF10A	2013-08-27		57	(M1)	Felony Battery (Dom Strang)	1	14013034MM10A	(M1)	0	2014-08-31	Trespass/Property/Other Structure	2014-08-31	2014-09-16		0					Risk of Recidivism	2	Low	2013-10-23	Risk of Violence	2	Low	2013-10-23	2014-03-22	2014-04-04	2	54
943	jarrod indik	jarrod	indik	2013-10-23	Male	1987-02-04	29	25 - 45	Caucasian	0	2	0	0	2	29	2013-11-21 04:46:06	2013-12-16 12:07:03	13012077CF10A	2013-08-27		57	(M1)	Felony Battery (Dom Strang)	1	14013034MM10A	(M1)	0	2014-08-31	Trespass/Property/Other Structure	2014-08-31	2014-09-16		0					Risk of Recidivism	2	Low	2013-10-23	Risk of Violence	2	Low	2013-10-23	2014-08-31	2014-09-16	2	163
944	zechariah faulk	zechariah	faulk	2014-01-03	Male	1987-10-11	28	25 - 45	African-American	0	3	0	0	10	0	2014-01-03 04:56:59	2014-01-03 08:00:20	14000141CF10A	2014-01-03		0	(F3)	Driving While License Revoked	0									0					Risk of Recidivism	3	Low	2014-01-03	Risk of Violence	2	Low	2014-01-03	2014-03-13	2014-03-21	10	0
944	zechariah faulk	zechariah	faulk	2014-01-03	Male	1987-10-11	28	25 - 45	African-American	0	3	0	0	10	0	2014-01-03 04:56:59	2014-01-03 08:00:20	14000141CF10A	2014-01-03		0	(F3)	Driving While License Revoked	0									0					Risk of Recidivism	3	Low	2014-01-03	Risk of Violence	2	Low	2014-01-03	2014-03-13	2014-03-21	10	77
945	laurence thomas	laurence	thomas	2013-10-18	Male	1990-03-31	26	25 - 45	African-American	0	8	0	0	6				13011582MM10A	2013-05-07		164	(M1)	Possess Cannabis/20 Grams Or Less	0									0					Risk of Recidivism	8	High	2013-10-18	Risk of Violence	8	High	2013-10-18			6	0
946	sylvester hicks	sylvester	hicks	2013-04-27	Male	1961-04-06	55	Greater than 45	African-American	0	3	0	0	9	0	2013-04-27 11:23:09	2013-05-01 06:19:51	12018015MO10A		2013-04-27	0	(MO3)	arrest case no charge	1	14002424CF10A	(F2)	0	2014-02-20	Deliver Cocaine	2014-02-20	2014-02-28		0					Risk of Recidivism	3	Low	2013-04-27	Risk of Violence	1	Low	2013-04-27	2014-02-20	2014-02-28	9	4
947	lemore noah	lemore	noah	2013-02-24	Female	1992-11-02	23	Less than 25	Caucasian	0	10	0	0	3	-1	2013-02-23 12:49:04	2013-03-01 06:16:35	13002766CF10A	2013-02-23		1	(F3)	Poss Contr Subst W/o Prescript	0									0					Risk of Recidivism	10	High	2013-02-24	Risk of Violence	9	High	2013-02-24	2013-04-03	2013-05-26	3	5
947	lemore noah	lemore	noah	2013-02-24	Female	1992-11-02	23	Less than 25	Caucasian	0	10	0	0	3	-1	2013-02-23 12:49:04	2013-03-01 06:16:35	13002766CF10A	2013-02-23		1	(F3)	Poss Contr Subst W/o Prescript	0									0					Risk of Recidivism	10	High	2013-02-24	Risk of Violence	9	High	2013-02-24	2013-04-03	2013-05-26	3	91
948	ashliegh batiste	ashliegh	batiste	2013-01-20	Female	1993-04-28	22	Less than 25	African-American	0	5	0	0	0	-1	2013-01-19 11:57:56	2013-01-27 05:20:46	13001334MO10A	2013-01-19		1	(MO3)	Failure To Pay Taxi Cab Charge	0									0					Risk of Recidivism	5	Medium	2013-01-20	Risk of Violence	6	Medium	2013-01-20	2013-01-19	2013-01-27	0	7
949	danielle malin	danielle	malin	2014-10-25	Female	1996-05-08	19	Less than 25	Caucasian	0	10	0	0	2	-2	2014-10-23 05:11:45	2014-11-14 11:47:41	14014288CF10A	2014-10-23		2	(F3)	Possession of Cocaine	1	14015607CF10A	(F3)	0	2014-11-20	Possession of Cocaine	2014-11-20	2015-01-07		0					Risk of Recidivism	10	High	2014-10-25	Risk of Violence	7	Medium	2014-10-25	2014-11-20	2015-01-07	2	20
950	michael williams	michael	williams	2013-05-24	Male	1993-02-10	23	Less than 25	African-American	0	10	0	0	4	0	2013-05-24 04:23:16	2013-05-26 08:24:37	13007422CF10A	2013-05-24		0	(F3)	Possession of Cocaine	0									0					Risk of Recidivism	10	High	2013-05-24	Risk of Violence	8	High	2013-05-24	2013-06-28	2013-10-17	4	2
950	michael williams	michael	williams	2013-05-24	Male	1993-02-10	23	Less than 25	African-American	0	10	0	0	4	0	2013-05-24 04:23:16	2013-05-26 08:24:37	13007422CF10A	2013-05-24		0	(F3)	Possession of Cocaine	0									0					Risk of Recidivism	10	High	2013-05-24	Risk of Violence	8	High	2013-05-24	2014-11-25	2015-05-08	4	524
950	michael williams	michael	williams	2013-05-24	Male	1993-02-10	23	Less than 25	African-American	0	10	0	0	4	0	2013-05-24 04:23:16	2013-05-26 08:24:37	13007422CF10A	2013-05-24		0	(F3)	Possession of Cocaine	0									0					Risk of Recidivism	10	High	2013-05-24	Risk of Violence	8	High	2013-05-24	2016-01-21	2020-01-01	4	714
950	michael williams	michael	williams	2013-05-24	Male	1993-02-10	23	Less than 25	African-American	0	10	0	0	4	0	2013-05-24 04:23:16	2013-05-26 08:24:37	13007422CF10A	2013-05-24		0	(F3)	Possession of Cocaine	0									0					Risk of Recidivism	10	High	2013-05-24	Risk of Violence	8	High	2013-05-24	2016-01-21	2020-01-01	4	1043
951	kelos francois	kelos	francois	2013-10-01	Male	1985-02-18	31	25 - 45	African-American	0	1	0	0	1	-27	2013-09-04 12:57:02	2013-09-04 08:28:00	13016878MM10A	2013-09-03		28	(M1)	Battery	0									0					Risk of Recidivism	1	Low	2013-10-01	Risk of Violence	1	Low	2013-10-01	2013-09-04	2013-09-04	1	0
953	curtis coombs	curtis	coombs	2014-03-10	Male	1986-06-11	29	25 - 45	African-American	0	1	0	0	0	0	2014-03-10 03:51:44	2014-03-11 03:42:19	14009450MU10A	2014-03-10		0	(M1)	DUI Level 0.15 Or Minor In Veh	0									0					Risk of Recidivism	1	Low	2014-03-10	Risk of Violence	1	Low	2014-03-10	2014-03-10	2014-03-11	0	1
954	brian rhoomes	brian	rhoomes	2013-03-31	Male	1994-08-02	21	Less than 25	African-American	0	6	0	0	1	-1	2013-03-30 07:08:35	2013-09-27 05:29:47	13000291MM30A	2013-02-14		45	(M1)	Possess Drug Paraphernalia	0									0					Risk of Recidivism	6	Medium	2013-03-31	Risk of Violence	6	Medium	2013-03-31	2013-11-30	2014-07-30	1	180
954	brian rhoomes	brian	rhoomes	2013-03-31	Male	1994-08-02	21	Less than 25	African-American	0	6	0	0	1	-1	2013-03-30 07:08:35	2013-09-27 05:29:47	13000291MM30A	2013-02-14		45	(M1)	Possess Drug Paraphernalia	0									0					Risk of Recidivism	6	Medium	2013-03-31	Risk of Violence	6	Medium	2013-03-31	2013-11-30	2014-07-30	1	486
955	anthony robinson	anthony	robinson	2013-04-08	Male	1954-07-13	61	Greater than 45	African-American	0	6	0	0	15	-1	2013-04-07 03:18:51	2013-04-08 07:34:33	13005014CF10A	2013-04-07		1	(F3)	Felony Petit Theft	1	13008244CF10A	(F3)	0	2013-06-11	Possession of Cocaine	2013-06-11	2013-06-12		0					Risk of Recidivism	6	Medium	2013-04-08	Risk of Violence	3	Low	2013-04-08	2013-06-11	2013-06-12	15	0
956	jaron thomas	jaron	thomas	2013-10-09	Male	1991-07-23	24	Less than 25	African-American	0	10	0	0	4	-175	2013-04-17 11:36:33	2013-04-18 05:06:12	13005512CF10A	2013-04-17		175	(F3)	Possession of Cocaine	1	15000796MM10A	(M1)	0	2015-01-21	Viol Injunct Domestic Violence	2015-01-21	2015-01-24		1	15008227CF10A	(F1)	2015-06-25	Robbery / Weapon	Risk of Recidivism	10	High	2013-10-09	Risk of Violence	9	High	2013-10-09	2014-10-14	2014-10-17	4	0
956	jaron thomas	jaron	thomas	2013-10-09	Male	1991-07-23	24	Less than 25	African-American	0	10	0	0	4	-175	2013-04-17 11:36:33	2013-04-18 05:06:12	13005512CF10A	2013-04-17		175	(F3)	Possession of Cocaine	1	15000796MM10A	(M1)	0	2015-01-21	Viol Injunct Domestic Violence	2015-01-21	2015-01-24		1	15008227CF10A	(F1)	2015-06-25	Robbery / Weapon	Risk of Recidivism	10	High	2013-10-09	Risk of Violence	9	High	2013-10-09	2015-01-21	2015-01-24	4	373
957	carolina deochoa	carolina	deochoa	2014-07-27	Male	1989-10-14	26	25 - 45	Hispanic	0	2	0	0	0	-1	2014-07-26 07:48:43	2014-07-27 08:56:13	14010199CF10A	2014-07-26		1	(F3)	Aggravated Assault W/Dead Weap	0									0					Risk of Recidivism	2	Low	2014-07-27	Risk of Violence	2	Low	2014-07-27	2014-07-26	2014-07-27	0	0
958	wilfredo alejo-dominguez	wilfredo	alejo-dominguez	2013-02-08	Male	1984-05-18	31	25 - 45	Hispanic	0	2	0	0	0	0	2013-02-08 05:06:56	2013-02-08 08:10:52	13002891MM10A	2013-02-08		0	(M2)	Operating W/O Valid License	0									0					Risk of Recidivism	2	Low	2013-02-08	Risk of Violence	2	Low	2013-02-08	2014-08-14	2014-08-19	0	0
958	wilfredo alejo-dominguez	wilfredo	alejo-dominguez	2013-02-08	Male	1984-05-18	31	25 - 45	Hispanic	0	2	0	0	0	0	2013-02-08 05:06:56	2013-02-08 08:10:52	13002891MM10A	2013-02-08		0	(M2)	Operating W/O Valid License	0									0					Risk of Recidivism	2	Low	2013-02-08	Risk of Violence	2	Low	2013-02-08	2014-08-14	2014-08-19	0	557
959	alex cadeau	alex	cadeau	2014-10-07	Male	1995-08-02	20	Less than 25	African-American	0	9	1	1	4	-1	2014-10-06 07:50:07	2014-10-08 10:47:24	14013484CF10A		2014-10-06	1	(F3)	arrest case no charge	1	14015555CF10A	(F3)	0	2014-11-18	Grand Theft in the 3rd Degree	2014-11-18	2015-03-07		0					Risk of Recidivism	9	High	2014-10-07	Risk of Violence	6	Medium	2014-10-07	2014-11-18	2015-03-07	4	1
960	darren bartron	darren	bartron	2013-03-22	Male	1989-12-05	26	25 - 45	Caucasian	0	7	0	0	3	-1	2013-03-21 06:34:13	2013-03-22 08:27:54	13004119CF10A	2013-03-21		1	(F2)	Burglary Conveyance Occupied	1	13130692TC30A	(M2)		2013-12-19	Operating W/O Valid License				0					Risk of Recidivism	7	Medium	2013-03-22	Risk of Violence	4	Low	2013-03-22	2014-10-30	2014-10-30	3	0
961	daiana facallopez	daiana	facallopez	2014-11-05	Female	1993-06-14	22	Less than 25	Hispanic	0	3	0	0	0	0	2014-11-05 04:55:07	2014-11-06 01:41:10	14040758MU10A	2014-11-05		0	(M1)	DUI Property Damage/Injury	0									0					Risk of Recidivism	3	Low	2014-11-05	Risk of Violence	3	Low	2014-11-05	2014-11-05	2014-11-06	0	1
962	robert rose	robert	rose	2013-08-24	Male	1988-07-24	27	25 - 45	Caucasian	0	9	0	0	5	0	2013-08-24 03:53:34	2013-08-25 08:30:23	13016215MM10A	2013-08-24		0	(M1)	Battery	0									0					Risk of Recidivism	9	High	2013-08-24	Risk of Violence	7	Medium	2013-08-24	2013-08-24	2013-08-25	5	1
963	stephanie coello	stephanie	coello	2013-12-25	Male	1990-10-28	25	25 - 45	Caucasian	0	5	0	0	1	-1	2013-12-24 08:20:02	2013-12-25 12:46:17	13017744CF10A	2013-12-24		1	(F3)	Aggravated Assault w/Firearm	0									0					Risk of Recidivism	5	Medium	2013-12-25	Risk of Violence	3	Low	2013-12-25	2013-12-24	2013-12-25	1	0
964	adiel jaramillo	adiel	jaramillo	2013-04-25	Male	1992-11-23	23	Less than 25	Caucasian	0	5	2	0	3	-1	2013-04-24 08:00:35	2013-05-03 09:45:57	13005980CF10A	2013-04-25		0	(F2)	Manslaughter W/Weapon/Firearm	1	13011613CF10A	(F3)	1	2013-08-19	Possession of Cannabis	2013-08-20	2013-12-03		0					Risk of Recidivism	5	Medium	2013-04-25	Risk of Violence	5	Medium	2013-04-25	2013-04-24	2013-05-03	3	8
965	jackson clerisier	jackson	clerisier	2014-02-06	Male	1977-09-13	38	25 - 45	African-American	0	1	0	0	0	-1	2014-02-05 09:19:16	2014-02-07 09:14:53	14001640CF10A	2014-02-05		1	(F3)	Felony Battery (Dom Strang)	0									0					Risk of Recidivism	1	Low	2014-02-06	Risk of Violence	1	Low	2014-02-06	2014-02-05	2014-02-07	0	1
966	carlos fuertes	carlos	fuertes	2014-12-19	Male	1964-09-14	51	Greater than 45	Caucasian	0	4	0	0	1	0	2014-12-19 12:41:22	2014-12-19 08:19:41	14016759CF10A	2014-12-18		1	(F3)	Possession Of Heroin	0									0					Risk of Recidivism	4	Low	2014-12-19	Risk of Violence	1	Low	2014-12-19	2014-12-19	2014-12-19	1	0
967	jarvis jones	jarvis	jones	2013-04-09	Male	1989-03-07	27	25 - 45	African-American	0	9	2	1	18	0	2013-04-09 01:28:20	2013-04-09 07:13:00	13005057CF10A	2013-04-08		1	(F3)	Felony Petit Theft	1	14007283TC20A	(M2)		2014-01-23	Susp Drivers Lic 1st Offense				0					Risk of Recidivism	9	High	2013-04-09	Risk of Violence	6	Medium	2013-04-09	2013-08-01	2014-01-01	18	0
967	jarvis jones	jarvis	jones	2013-04-09	Male	1989-03-07	27	25 - 45	African-American	0	9	2	1	18	0	2013-04-09 01:28:20	2013-04-09 07:13:00	13005057CF10A	2013-04-08		1	(F3)	Felony Petit Theft	1	14007283TC20A	(M2)		2014-01-23	Susp Drivers Lic 1st Offense				0					Risk of Recidivism	9	High	2013-04-09	Risk of Violence	6	Medium	2013-04-09	2013-08-01	2014-01-01	18	267
968	jessica baron	jessica	baron	2014-09-14	Female	1980-07-15	35	25 - 45	Caucasian	0	3	0	0	0	0	2014-09-14 04:21:37	2014-09-14 01:19:27	14012489CF10A	2014-09-14		0	(F3)	Resist Officer w/Violence	1	15004121MU10A	(M1)	0	2015-02-09	Driving Under The Influence	2015-02-09	2015-02-09		0					Risk of Recidivism	3	Low	2014-09-14	Risk of Violence	2	Low	2014-09-14	2015-02-09	2015-02-09	0	0
968	jessica baron	jessica	baron	2014-09-14	Female	1980-07-15	35	25 - 45	Caucasian	0	3	0	0	0	0	2014-09-14 04:21:37	2014-09-14 01:19:27	14012489CF10A	2014-09-14		0	(F3)	Resist Officer w/Violence	1	15004121MU10A	(M1)	0	2015-02-09	Driving Under The Influence	2015-02-09	2015-02-09		0					Risk of Recidivism	3	Low	2014-09-14	Risk of Violence	2	Low	2014-09-14	2015-02-09	2015-02-09	0	148
969	luc tismeus	luc	tismeus	2013-02-06	Male	1993-09-23	22	Less than 25	Other	0	9	0	0	0	-1	2013-02-05 04:14:37	2013-02-21 05:24:06	13001811CF10A	2013-02-05		1	(F3)	Grand Theft (Motor Vehicle)	0									0					Risk of Recidivism	9	High	2013-02-06	Risk of Violence	7	Medium	2013-02-06	2013-02-05	2013-02-21	0	15
970	theodore lynch	theodore	lynch	2014-03-18	Male	1977-09-20	38	25 - 45	African-American	0	6	0	0	11	-1	2014-03-17 09:38:30	2014-03-19 09:46:17	14003754CF10A	2014-03-17		1	(F3)	Driving While License Revoked	0									0					Risk of Recidivism	6	Medium	2014-03-18	Risk of Violence	1	Low	2014-03-18	2014-07-10	2014-09-23	11	1
970	theodore lynch	theodore	lynch	2014-03-18	Male	1977-09-20	38	25 - 45	African-American	0	6	0	0	11	-1	2014-03-17 09:38:30	2014-03-19 09:46:17	14003754CF10A	2014-03-17		1	(F3)	Driving While License Revoked	0									0					Risk of Recidivism	6	Medium	2014-03-18	Risk of Violence	1	Low	2014-03-18	2014-07-10	2014-09-23	11	189
971	crystal shellman	crystal	shellman	2014-09-10	Female	1957-06-25	58	Greater than 45	African-American	0	2	0	0	4	-14	2014-08-27 09:14:45	2014-08-28 09:22:51	14011695CF10A	2014-08-27		14	(F3)	Poss 3,4 MDMA (Ecstasy)	1	15000238MM30A	(M2)		2015-01-18	Petit Theft				1	15012748CF10A	(M1)	2015-10-02	Battery	Risk of Recidivism	2	Low	2014-09-10	Risk of Violence	1	Low	2014-09-10	2016-02-19	2016-02-21	4	0
972	herman isaacs	herman	isaacs	2014-10-08	Male	1971-05-22	44	25 - 45	African-American	0	1	0	0	6	-56	2014-08-13 05:50:24	2014-10-02 11:34:27	12010524CF10A		2014-08-13	56	(F3)	arrest case no charge	0									0					Risk of Recidivism	1	Low	2014-10-08	Risk of Violence	3	Low	2014-10-08	2014-08-13	2014-10-02	6	0
973	shelley bauman	shelley	bauman	2014-05-22	Female	1959-03-20	57	Greater than 45	Caucasian	0	4	0	0	0	-1	2014-05-21 11:16:40	2014-05-23 08:33:33	14008221MM10A	2014-05-20		2	(M2)	Disorderly Conduct	1	15000280MM20A	(M1)		2015-01-11	Possess Cannabis/20 Grams Or Less				0					Risk of Recidivism	4	Low	2014-05-22	Risk of Violence	1	Low	2014-05-22	2014-05-21	2014-05-23	0	1
974	yvecken charles	yvecken	charles	2014-12-23	Male	1979-10-01	36	25 - 45	Other	0	2	0	0	6	-4	2014-12-19 10:31:03	2014-12-23 12:06:15	13003990CF10A		2014-12-19	4	(F7)	arrest case no charge	0									0					Risk of Recidivism	2	Low	2014-12-23	Risk of Violence	3	Low	2014-12-23	2016-01-04	2016-02-08	6	0
974	yvecken charles	yvecken	charles	2014-12-23	Male	1979-10-01	36	25 - 45	Other	0	2	0	0	6	-4	2014-12-19 10:31:03	2014-12-23 12:06:15	13003990CF10A		2014-12-19	4	(F7)	arrest case no charge	0									0					Risk of Recidivism	2	Low	2014-12-23	Risk of Violence	3	Low	2014-12-23	2016-01-04	2016-02-08	6	412
975	jonathan saintil	jonathan	saintil	2014-02-27	Male	1995-02-05	21	Less than 25	African-American	0	3	0	1	0	-1	2014-02-26 09:16:23	2014-02-27 02:05:20	14002730CF10A	2014-02-26		1	(F3)	Use Scanning Device to Defraud	0									0					Risk of Recidivism	3	Low	2014-02-27	Risk of Violence	5	Medium	2014-02-27	2014-02-26	2014-02-27	0	0
976	adonte pante	adonte	pante	2014-08-08	Male	1995-09-08	20	Less than 25	African-American	0	5	0	0	1	-1	2014-08-07 01:33:00	2014-08-15 08:46:00	14010754CF10A	2014-08-07		1	(F3)	Grand Theft in the 3rd Degree	0									0					Risk of Recidivism	5	Medium	2014-08-08	Risk of Violence	8	High	2014-08-08	2014-08-07	2014-08-15	1	7
977	katavia latson	katavia	latson	2013-12-05	Female	1994-03-03	22	Less than 25	African-American	0	8	0	0	0	-1	2013-12-04 07:09:34	2013-12-05 09:19:46	13016777CF10A	2013-12-04		1	(F3)	Grand Theft in the 3rd Degree	0									0					Risk of Recidivism	8	High	2013-12-05	Risk of Violence	6	Medium	2013-12-05	2013-12-04	2013-12-05	0	0
978	christopher haye	christopher	haye	2013-01-15	Male	1986-02-16	30	25 - 45	African-American	0	2	0	0	0	-1	2013-01-14 07:16:50	2013-01-17 03:17:43	13000619CF10A	2013-01-14		1	(F2)	Burglary Unoccupied Dwelling	0									0					Risk of Recidivism	2	Low	2013-01-15	Risk of Violence	2	Low	2013-01-15	2013-01-14	2013-01-17	0	2
979	mcdowell sherwood	mcdowell	sherwood	2014-07-08	Male	1991-06-05	24	Less than 25	Caucasian	0	10	0	0	1	-38	2014-05-31 02:17:45	2014-07-07 10:38:33	14007557CF10A		2014-07-02	6	(F3)	arrest case no charge	1	16002744MO10A	(M1)	0	2016-03-23		2016-03-23	2016-03-25		0					Risk of Recidivism	10	High	2014-07-08	Risk of Violence	9	High	2014-07-08	2014-11-13	2014-12-17	1	0
979	mcdowell sherwood	mcdowell	sherwood	2014-07-08	Male	1991-06-05	24	Less than 25	Caucasian	0	10	0	0	1	-38	2014-05-31 02:17:45	2014-07-07 10:38:33	14007557CF10A		2014-07-02	6	(F3)	arrest case no charge	1	16002744MO10A	(M1)	0	2016-03-23		2016-03-23	2016-03-25		0					Risk of Recidivism	10	High	2014-07-08	Risk of Violence	9	High	2014-07-08	2016-03-23	2016-03-25	1	162
981	guy pagan	guy	pagan	2014-05-05	Male	1959-11-16	56	Greater than 45	Caucasian	0	1	0	0	1	-1	2014-05-04 07:33:03	2014-05-06 03:49:16	14007369MM10A	2014-05-04		1	(M1)	Battery	0									0					Risk of Recidivism	1	Low	2014-05-05	Risk of Violence	1	Low	2014-05-05	2014-05-04	2014-05-06	1	1
982	ronald lopez	ronald	lopez	2014-08-30	Male	1983-10-23	32	25 - 45	African-American	0	3	0	0	1	-1	2014-08-29 02:59:37	2014-08-30 08:52:12	14011806CF10A	2014-08-29		1	(F3)	Aggravated Assault W/Dead Weap	0									0					Risk of Recidivism	3	Low	2014-08-30	Risk of Violence	1	Low	2014-08-30	2014-12-04	2014-12-12	1	0
982	ronald lopez	ronald	lopez	2014-08-30	Male	1983-10-23	32	25 - 45	African-American	0	3	0	0	1	-1	2014-08-29 02:59:37	2014-08-30 08:52:12	14011806CF10A	2014-08-29		1	(F3)	Aggravated Assault W/Dead Weap	0									0					Risk of Recidivism	3	Low	2014-08-30	Risk of Violence	1	Low	2014-08-30	2014-12-04	2014-12-12	1	104
983	glenn rowe	glenn	rowe	2013-12-10	Male	1993-10-19	22	Less than 25	Caucasian	0	4	0	0	2	-40	2013-10-31 02:13:50	2013-11-27 08:48:45	13015187CF10A	2013-10-30		41	(F3)	Battery on Law Enforc Officer	1	14002283CF10A	(M1)	0	2014-02-18	Battery	2014-02-18	2014-05-09		1	14002283CF10A	(M1)	2014-02-18	Battery	Risk of Recidivism	4	Low	2013-12-10	Risk of Violence	6	Medium	2013-12-10	2014-02-18	2014-05-09	2	0
985	julio garcia	julio	garcia	2014-05-21	Male	1985-04-08	31	25 - 45	Hispanic	0	2	0	0	1	-50	2014-04-01 12:51:26	2014-05-15 09:21:02	14004486CF10A		2014-04-01	50	(F2)	arrest case no charge	0									0					Risk of Recidivism	2	Low	2014-05-21	Risk of Violence	2	Low	2014-05-21	2014-04-01	2014-05-15	1	0
986	joe mori	joe	mori	2014-08-05	Male	1986-12-11	29	25 - 45	Caucasian	0	4	0	0	3	-61	2014-06-05 10:48:36	2014-07-14 09:25:13	14007805CF10A	2014-06-05		61	(F3)	Aggrav Stalking After Injunctn	1	15064282TC40A	(M2)		2015-11-06	Susp Drivers Lic 1st Offense				0					Risk of Recidivism	4	Low	2014-08-05	Risk of Violence	2	Low	2014-08-05	2015-07-04	2015-07-15	3	0
[truncated: 12,237 more rows]
[truncated: 2 more columns]
